# Supplementary material
Source: ML conference proceedings conference paper supplement (https://aclanthology.org/2024.emnlp-main.520)

[40] Caleb\_Herrick (Male): "Got an update for us?  
We can't afford to sit this out for too much  
longer. Know what I mean."

[43] Player: "Velma was embezzling from MSI. She's  
agreed to up your wages in exchange for my  
silence."

[44] Player: "You've got your pay raise."

[46] Caleb\_Herrick (Male): "Well, I'll be a  
raptidon's dinner. Reckon I ought to listen to  
gossip more often!"

[45] Caleb\_Herrick (Male): "How'd you manage that?  
Wait. Never mind. If I question it, it'll turn out  
to not be true. 'Sides, I'd never follow how you  
got Velma to part ways with a bit cart of her own  
accord."

[70] Caleb\_Herrick (Male): "Here, take this as  
compensation. It ain't a lot, but I hope it shows  
how much we appreciate all you've done."

[48] Caleb\_Herrick (Male): "Now, me and my friends  
here better get back to work. Before Velma blows a  
fuse!"

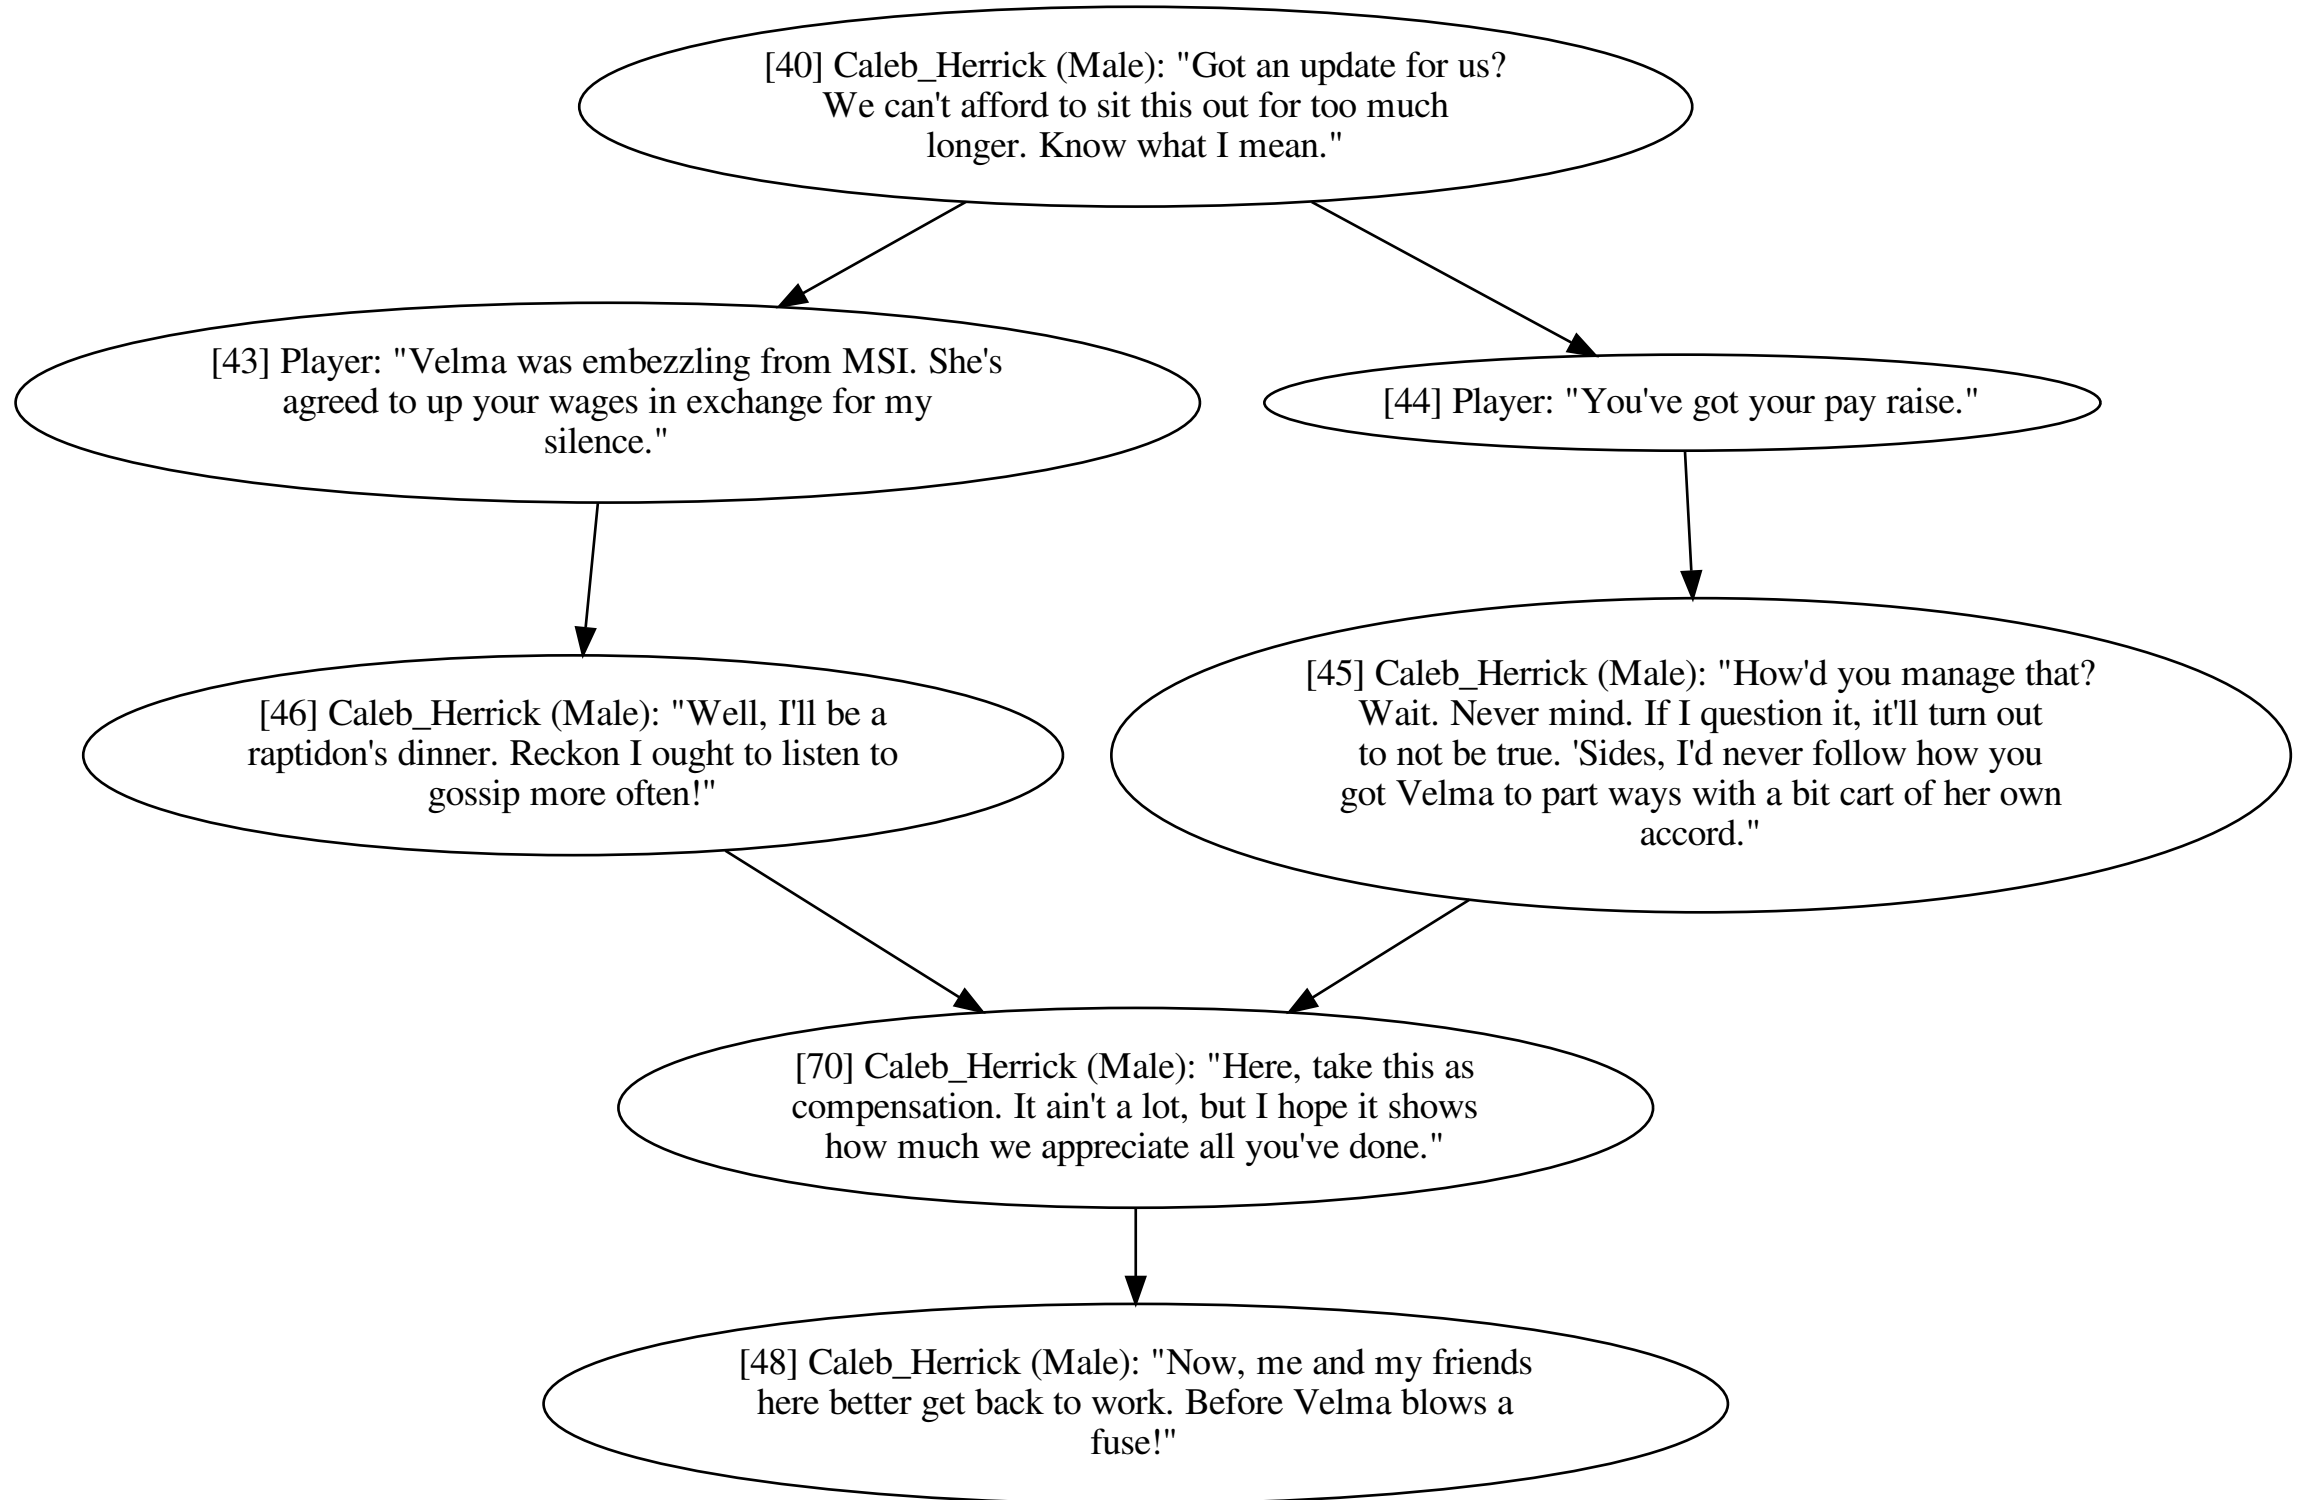

Supplement: software [file 2024.emnlp-main.520.software.zip]
