# Supplementary material
Source: ML conference proceedings conference paper supplement (https://aclanthology.org/2024.emnlp-main.520)
Supplement: software [file 2024.emnlp-main.520.software.zip]

[251] JunleiTennyson (Female): "My boards are returning to green. What a weight that is off my shoulders. I don't normally tolerate outsiders mucking about in my station's guts, but you're all right."

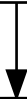

[40] JunleiTennyson (Female): "The temperature should be dropping as we speak. I'll see to it the crew knows who kept us all from boiling alive."
