# Supplementary material
Source: ML conference proceedings conference paper supplement (https://aclanthology.org/2024.emnlp-main.520)
Supplement: software [file 2024.emnlp-main.520.software.zip]

[2] HPSClerk (Female): "How may I be of assistance?"

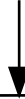

[74] Player: "I'm here to pick up a parcel for Celeste Jolicoeur."

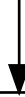

[75] HPSClerk (Female): "Of course. If you could just verify for me that you are Jolicoeur-comma-Celeste, or an officially authorized proxy?"

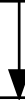

[78] Player: "<Show her your authorization.> Celeste gave me this."

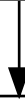

[76] HPSClerk (Female): "Everything seems to be in order. Here you are - one parcel."

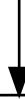

[80] HPSClerk (Female): "I hope this has been a pleasant and satisfying transaction. Halcyon Parcel Service thanks you for your patronage."
