# Supplementary material
Source: ML conference proceedings conference paper supplement (https://aclanthology.org/2024.emnlp-main.520)
Supplement: software [file 2024.emnlp-main.520.software.zip]

[4] MayVanNoy (Female): "Any luck out there?"

```
graph TD; A([4] MayVanNoy (Female): "Any luck out there?") --> B([8] Player: "I found your trauma kit. Your medic is dead."); A --> C([123] Player: "Not yet."); B --> D([113] MayVanNoy (Female): "Oh, fuck. Well... that's better than nothing. Thanks. We'll head out soon as we're patched up.")
```

[8] Player: "I found your trauma kit. Your medic is dead."

[123] Player: "Not yet."

[113] MayVanNoy (Female): "Oh, fuck. Well... that's better than nothing. Thanks. We'll head out soon as we're patched up."
