# Supplementary material
Source: ML conference proceedings conference paper supplement (https://aclanthology.org/2024.emnlp-main.520)
Supplement: software [file 2024.emnlp-main.520.software.zip]

[131] Player: "I've got your magic pills. These things are dangerous, you know."

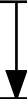

[134] Nyoka (Female): "More or less dangerous than a steady supply of alcohol? Give it here."
