# Supplementary material
Source: ML conference proceedings conference paper supplement (https://aclanthology.org/2024.emnlp-main.520)

[9] Berthold Fox (Male): "Hey, Mantiqueen Slayer.  
Glad you made it in one piece. After all, not  
everyone's so lucky."

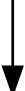

[10] Berthold Fox (Male): "Meet my Corporate  
Compliance Crew. Then check out our weapons locker  
inside. I reckon you'll find something you like. "

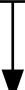

[21] Berthold Fox (Male): "Then we call it even  
between us."

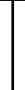

[13] Player: "I'll keep an eye out for that."

[36] Player: "Kind of odd for a group of mercs to  
label themselves as a corporate entity."

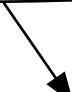

[37] Berthold Fox (Male): "The corporate model is  
the oldest and most efficient, not to mention  
stable, structure history has ever shown us. Plus,  
corporations got certain rights not entailed to  
individuals."

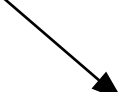

[38] Berthold Fox (Male): "I lead the C3s. Addie  
covers our payroll and expenditures. Lance handles  
the human capital, and Donald is our charming  
public face."

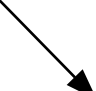

[44] Berthold Fox (Male): "Our system works -  
we've racked up more confirmed kills than any  
other crew you can hire."

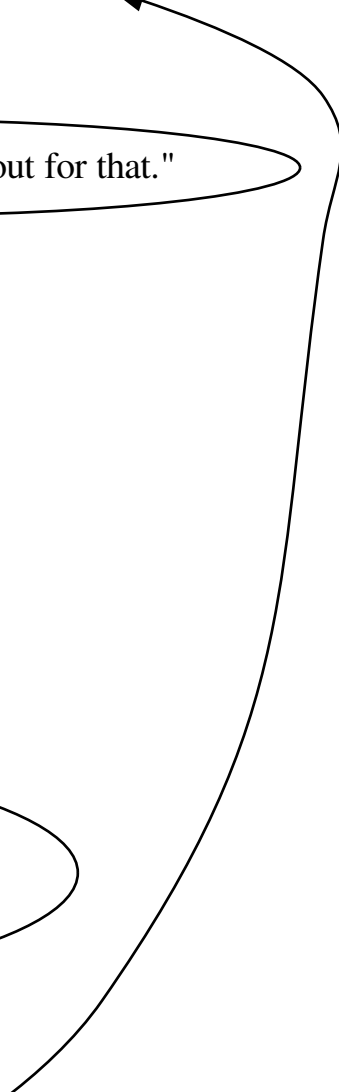

Supplement: software [file 2024.emnlp-main.520.software.zip]
