# Supplementary material
Source: ML conference proceedings conference paper supplement (https://aclanthology.org/2024.emnlp-main.520)
Supplement: software [file 2024.emnlp-main.520.software.zip]

[26] WandaDorsett (Female): "Were I a gambling woman, I'd wager you're responsible for my mechanicals' safe return."

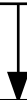

[27] WandaDorsett (Female): "I can't thank you enough."
