# Supplementary material
Source: ML conference proceedings conference paper supplement (https://aclanthology.org/2024.emnlp-main.520)
Supplement: software [file 2024.emnlp-main.520.software.zip]

[84] Giles Molina (Male): "Any luck finding my sprats?"

```
graph TD; A([84] Giles Molina (Male): "Any luck finding my sprats?") --> B([85] Player: "I have them all."); B --> C([86] Giles Molina (Male): "Truly? Why, this is marvelous!"); C --> D([91] Giles Molina (Male): "Oh, dear, it looks like some of my darlings have suffered violent misfortune. Nevertheless, it's good to have them back."); D --> E([92] Giles Molina (Male): "Thank you for your help. I'm afraid I can't spare much, but I hope you'll accept this."); E --> F([89] Giles Molina (Male): "Now, I've got to get back to the lab before my supervisor logs my absence.");
```

[85] Player: "I have them all."

[86] Giles Molina (Male): "Truly? Why, this is marvelous!"

[91] Giles Molina (Male): "Oh, dear, it looks like some of my darlings have suffered violent misfortune. Nevertheless, it's good to have them back."

[92] Giles Molina (Male): "Thank you for your help. I'm afraid I can't spare much, but I hope you'll accept this."

[89] Giles Molina (Male): "Now, I've got to get back to the lab before my supervisor logs my absence."
