# Supplementary material
Source: ML conference proceedings conference paper supplement (https://aclanthology.org/2024.emnlp-main.520)
Supplement: software [file 2024.emnlp-main.520.software.zip]

[10] Player: "Hey, I've fixed all your stuff."



```
graph TD; A([10] Player: "Hey, I've fixed all your stuff.") --> B([55] Bronson (Male): "I'll be damned. Thanks for doing that. Here - Zora sets aside a bit or two for people who help out."); B --> C([78] Bronson (Male): "Before you ask, no, it ain't pay. Just being generous to folks who do a good turn.");
```

[55] Bronson (Male): "I'll be damned. Thanks for doing that. Here - Zora sets aside a bit or two for people who help out."

[78] Bronson (Male): "Before you ask, no, it ain't pay. Just being generous to folks who do a good turn."
