# Supplementary material
Source: ML conference proceedings conference paper supplement (https://aclanthology.org/2024.emnlp-main.520)
Supplement: software [file 2024.emnlp-main.520.software.zip]

[140] Player: "I picked up this distress call. Can you play it back for me?"

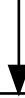

[141] PlayerShipAI (Female): "Yes, Captain. Beginning playback now."

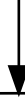

[142] UnknownCharacter (Male): "There's... there's viscera and death! Everywhere! Gunfire, gnashing teeth, the unemployed! For Law's sake, if anyone's receiving this, please send help!"

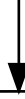

[494] UnknownCharacter (Male): "W-W-Wait, what? No, no no - "

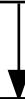

[496] PlayerShipAI (Female): "[Static] "

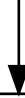

[143] PlayerShipAI (Female): "Captain, we are now capable of accessing the Roseway landing pad."

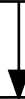

[723] PlayerShipAI (Female): "Also, corporate protocol requires that all distress signals include a list of key personnel for retrieval. The embedded names are: Anton Crane, Vaughn Cortes, and Orson Shaw."
