# Supplementary material
Source: ML conference proceedings conference paper supplement (https://aclanthology.org/2024.emnlp-main.520)
Supplement: software [file 2024.emnlp-main.520.software.zip]

[54] Player: "You mentioned a logic module. I found one in the geothermal plant."

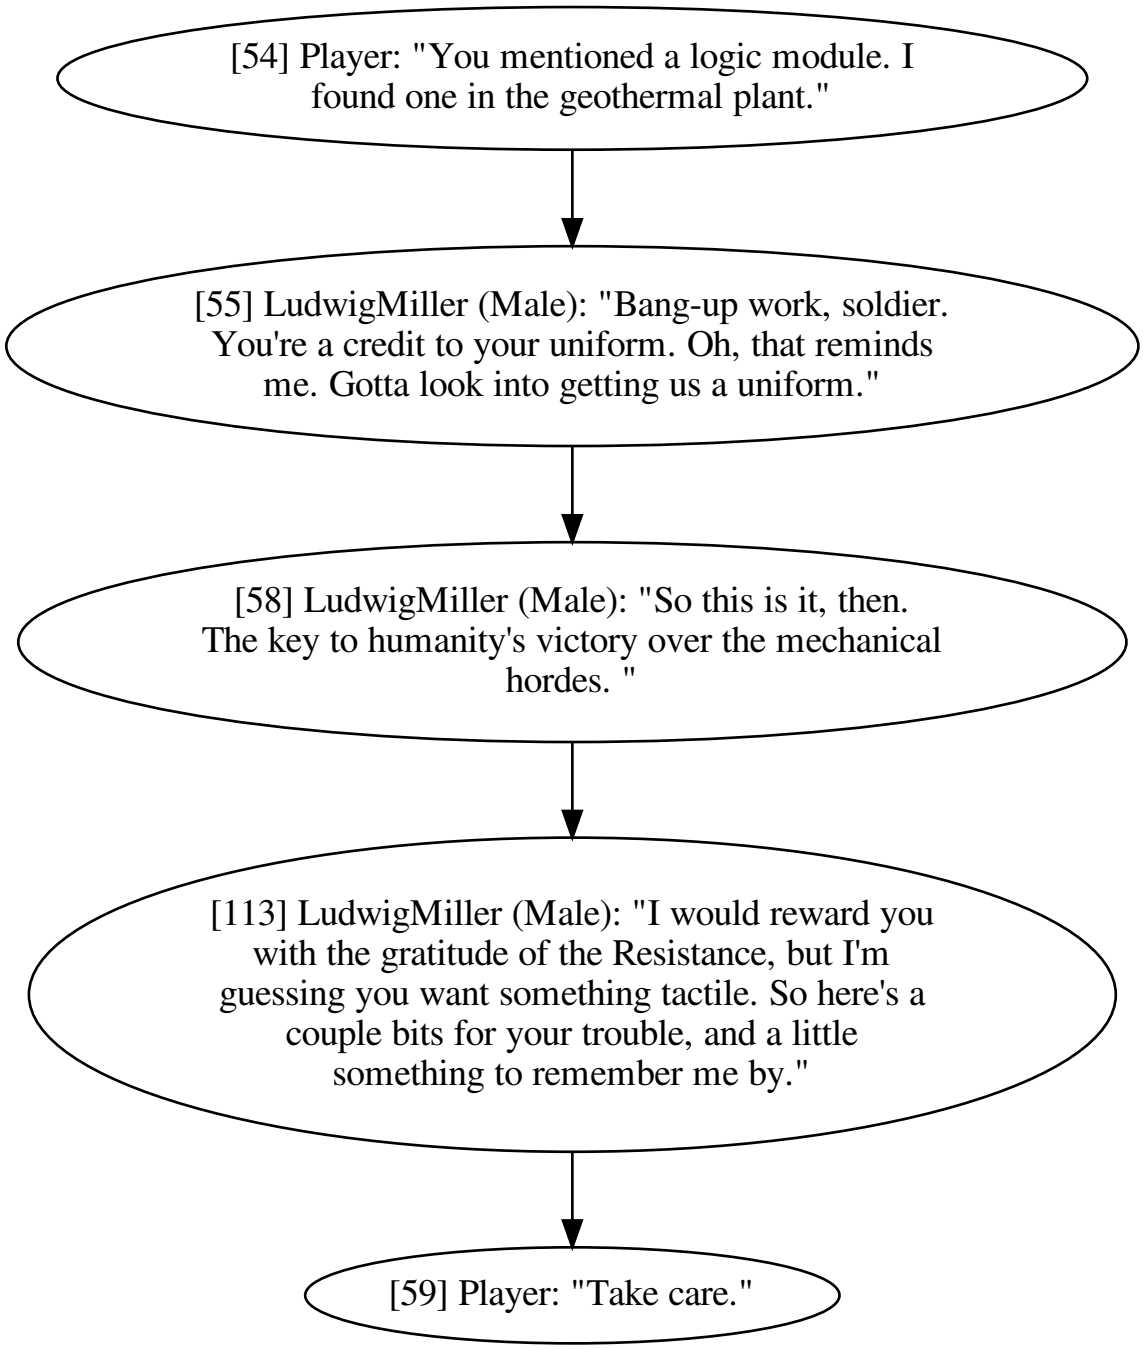

```
graph TD; A([54] Player: "You mentioned a logic module. I found one in the geothermal plant.") --> B([55] LudwigMiller (Male): "Bang-up work, soldier. You're a credit to your uniform. Oh, that reminds me. Gotta look into getting us a uniform."); B --> C([58] LudwigMiller (Male): "So this is it, then. The key to humanity's victory over the mechanical hordes. "); C --> D([113] LudwigMiller (Male): "I would reward you with the gratitude of the Resistance, but I'm guessing you want something tactile. So here's a couple bits for your trouble, and a little something to remember me by."); D --> E([59] Player: "Take care.");
```

[55] LudwigMiller (Male): "Bang-up work, soldier. You're a credit to your uniform. Oh, that reminds me. Gotta look into getting us a uniform."

[58] LudwigMiller (Male): "So this is it, then. The key to humanity's victory over the mechanical hordes. "

[113] LudwigMiller (Male): "I would reward you with the gratitude of the Resistance, but I'm guessing you want something tactile. So here's a couple bits for your trouble, and a little something to remember me by."

[59] Player: "Take care."
