# Supplementary material
Source: ML conference proceedings conference paper supplement (https://aclanthology.org/2024.emnlp-main.520)
Supplement: software [file 2024.emnlp-main.520.software.zip]

[81] Celia (Female): "Greetings, and welcome to Monarch Stellar Industries, producers and purveyors of the finest saltuna in Halcyon."

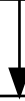

[84] Celia (Female): "What can I do for you today?"

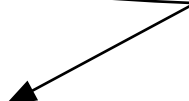

[153] Player: "Grimm asked me to check with you about his tossball poster."

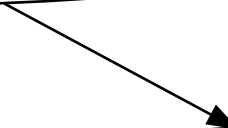

[88] Player: "Never mind."

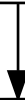

[155] Celia (Female): "You know, sending you is the first bright idea I've seen from that man. Because I told him to stop bothering me about it a week ago."

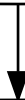

[156] Celia (Female): "I still don't know anything about it. But if you want to help him, Velma's the one to ask. She's in the warehouse."

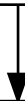

[166] Celia (Female): "But I'll warn you, Grimm wore her patience thin a long time ago."
