# Supplementary material
Source: ML conference proceedings conference paper supplement (https://aclanthology.org/2024.emnlp-main.520)
Supplement: software [file 2024.emnlp-main.520.software.zip]

[145] Player: "I found Mr. Pickett's journal."

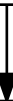

[168] sebastianadams (Male): "He'll probably be wanting it back. You see any sign of him?"

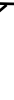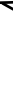

[169] Player: "I found the journal inside a dead mantiqueen."

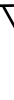

[189] Player: "He's dead. Eaten by a mantiqueen."

[172] sebastianadams (Male): "Funny place to leave a journal. But what about Mr. Pickett?"

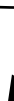

[171] Player: "He was eaten by a mantiqueen. He's dead. All that's left is that journal."

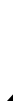

[174] sebastianadams (Male): "That's pretty sad. He sure seemed like he knew what he was doing."

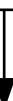

[176] sebastianadams (Male): "So this journal is all he left behind? Seems like I ought to read it. Looks mighty long, though."

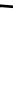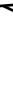

[186] Player: "Look on the bright side. He found his mantiqueen."

[177] Player: "Maybe focus on not sending anyone else out alone against a mantiqueen."

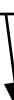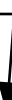

[187] sebastianadams (Male): "Huh. That's a fine way of putting it."

[181] sebastianadams (Male): "Yeah, you're probably right."

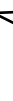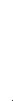

[179] sebastianadams (Male): "In any case, I appreciate you tracking down Mr. Pickett for me. Here's some bits for your trouble."

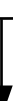

[191] Player: "Thanks."
