# Supplementary material
Source: ML conference proceedings conference paper supplement (https://aclanthology.org/2024.emnlp-main.520)
Supplement: software [file 2024.emnlp-main.520.software.zip]

[117] Player: "Hey, about those fees you wanted."

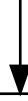

[27] Silas (Male): "You run into any trouble?"

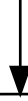

[28] Player: "I'm all done. Paperwork, fees, and signatures."

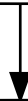

[29] Silas (Male): "Reliable work from a freelancer. That's gonna take some getting used to."

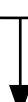

[119] Player: "I went out of my way for you."

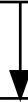

[120] Silas (Male): "And I'll buy you a drink some time."

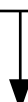

[121] Player: "I was hoping for something more tangible."

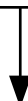

[123] Silas (Male): "Well, suppose you've earned it. One good turn deserves another."

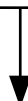

[169] Player: "Take care."
