# Supplementary material (part 1 of 2)
Source: ML conference proceedings conference paper supplement (https://aclanthology.org/2024.emnlp-main.520)

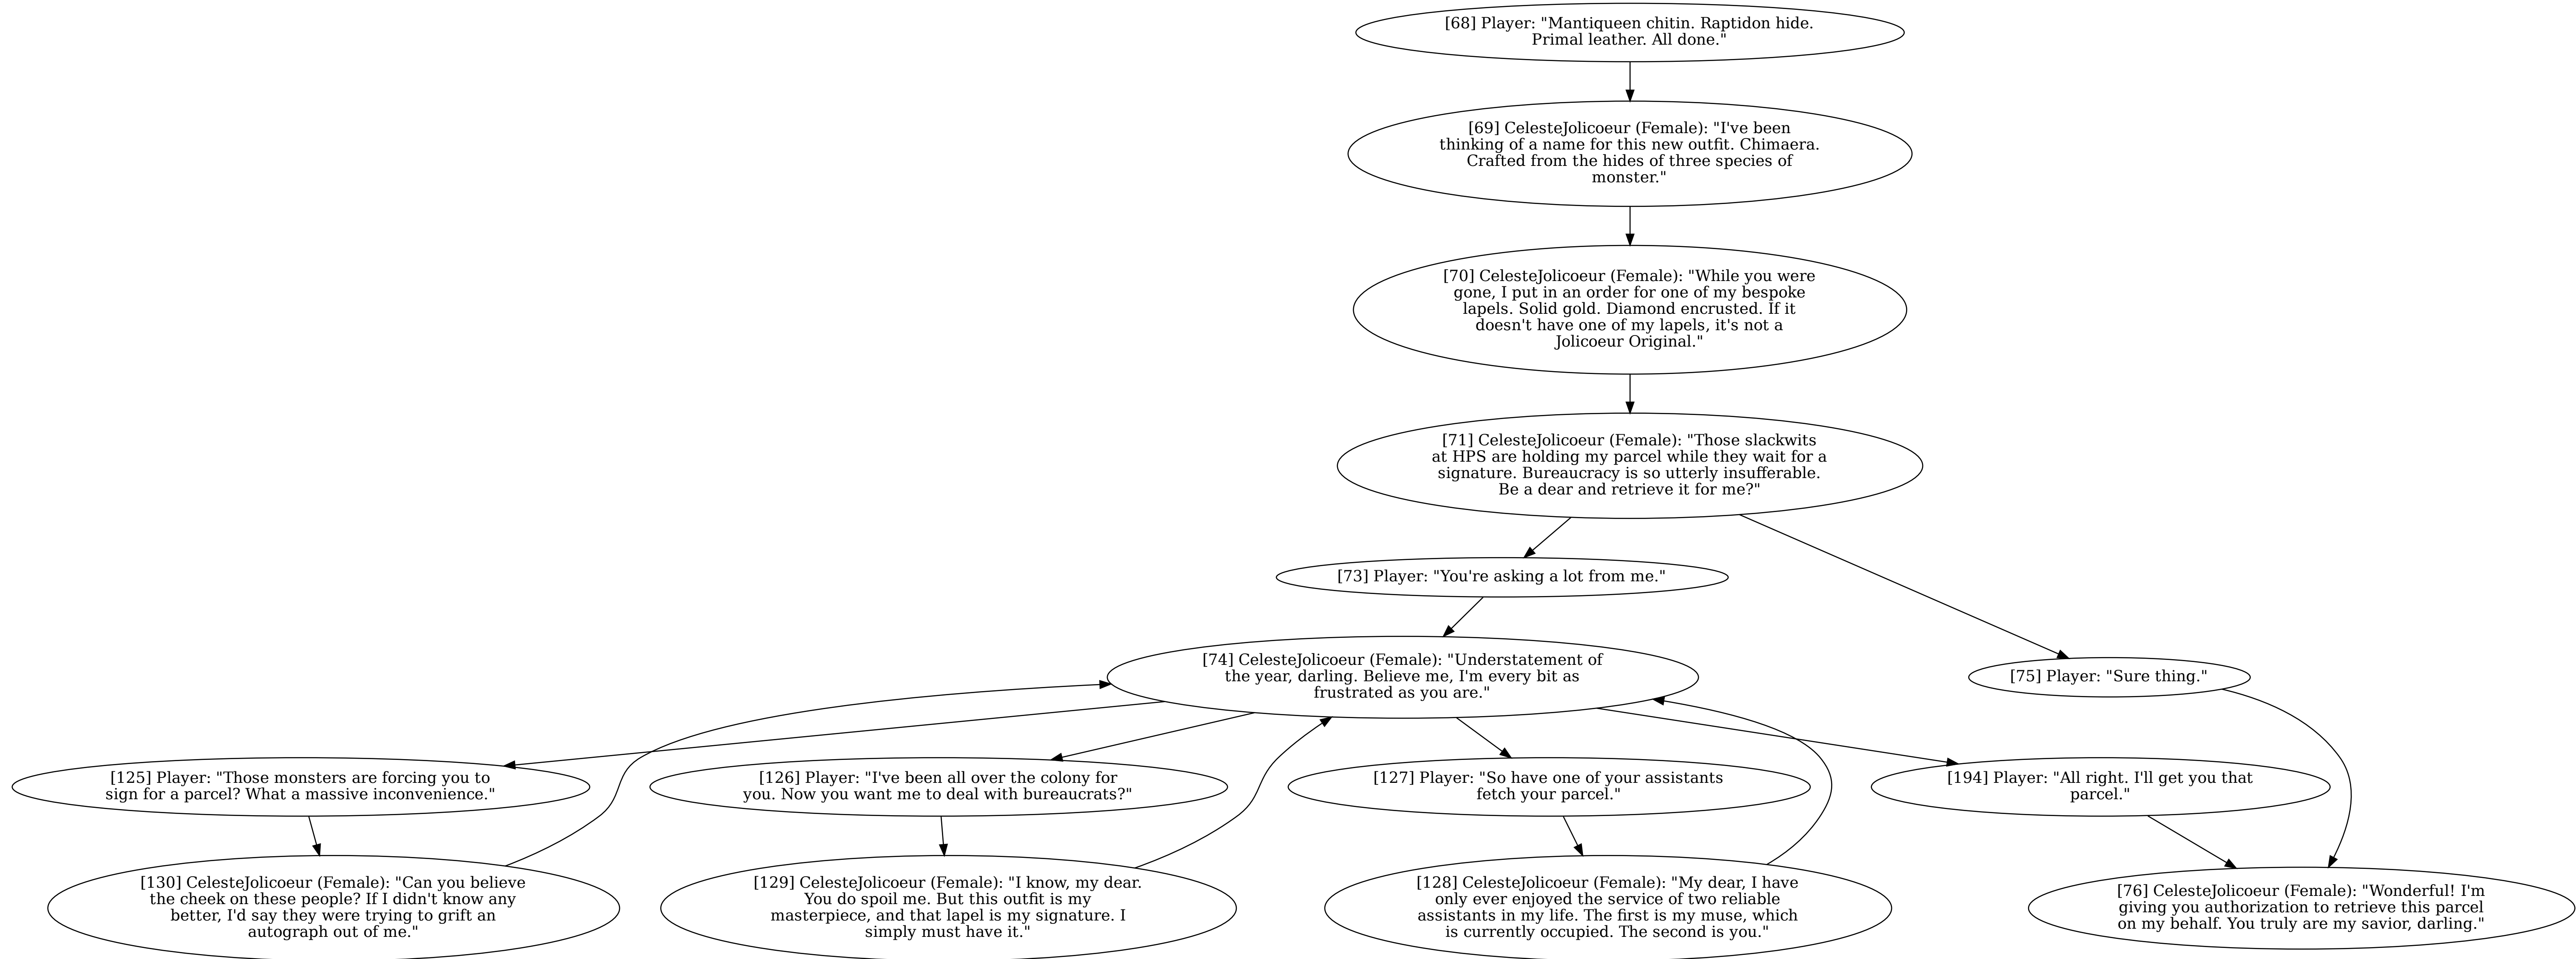

Supplement: software [file 2024.emnlp-main.520.software.zip]

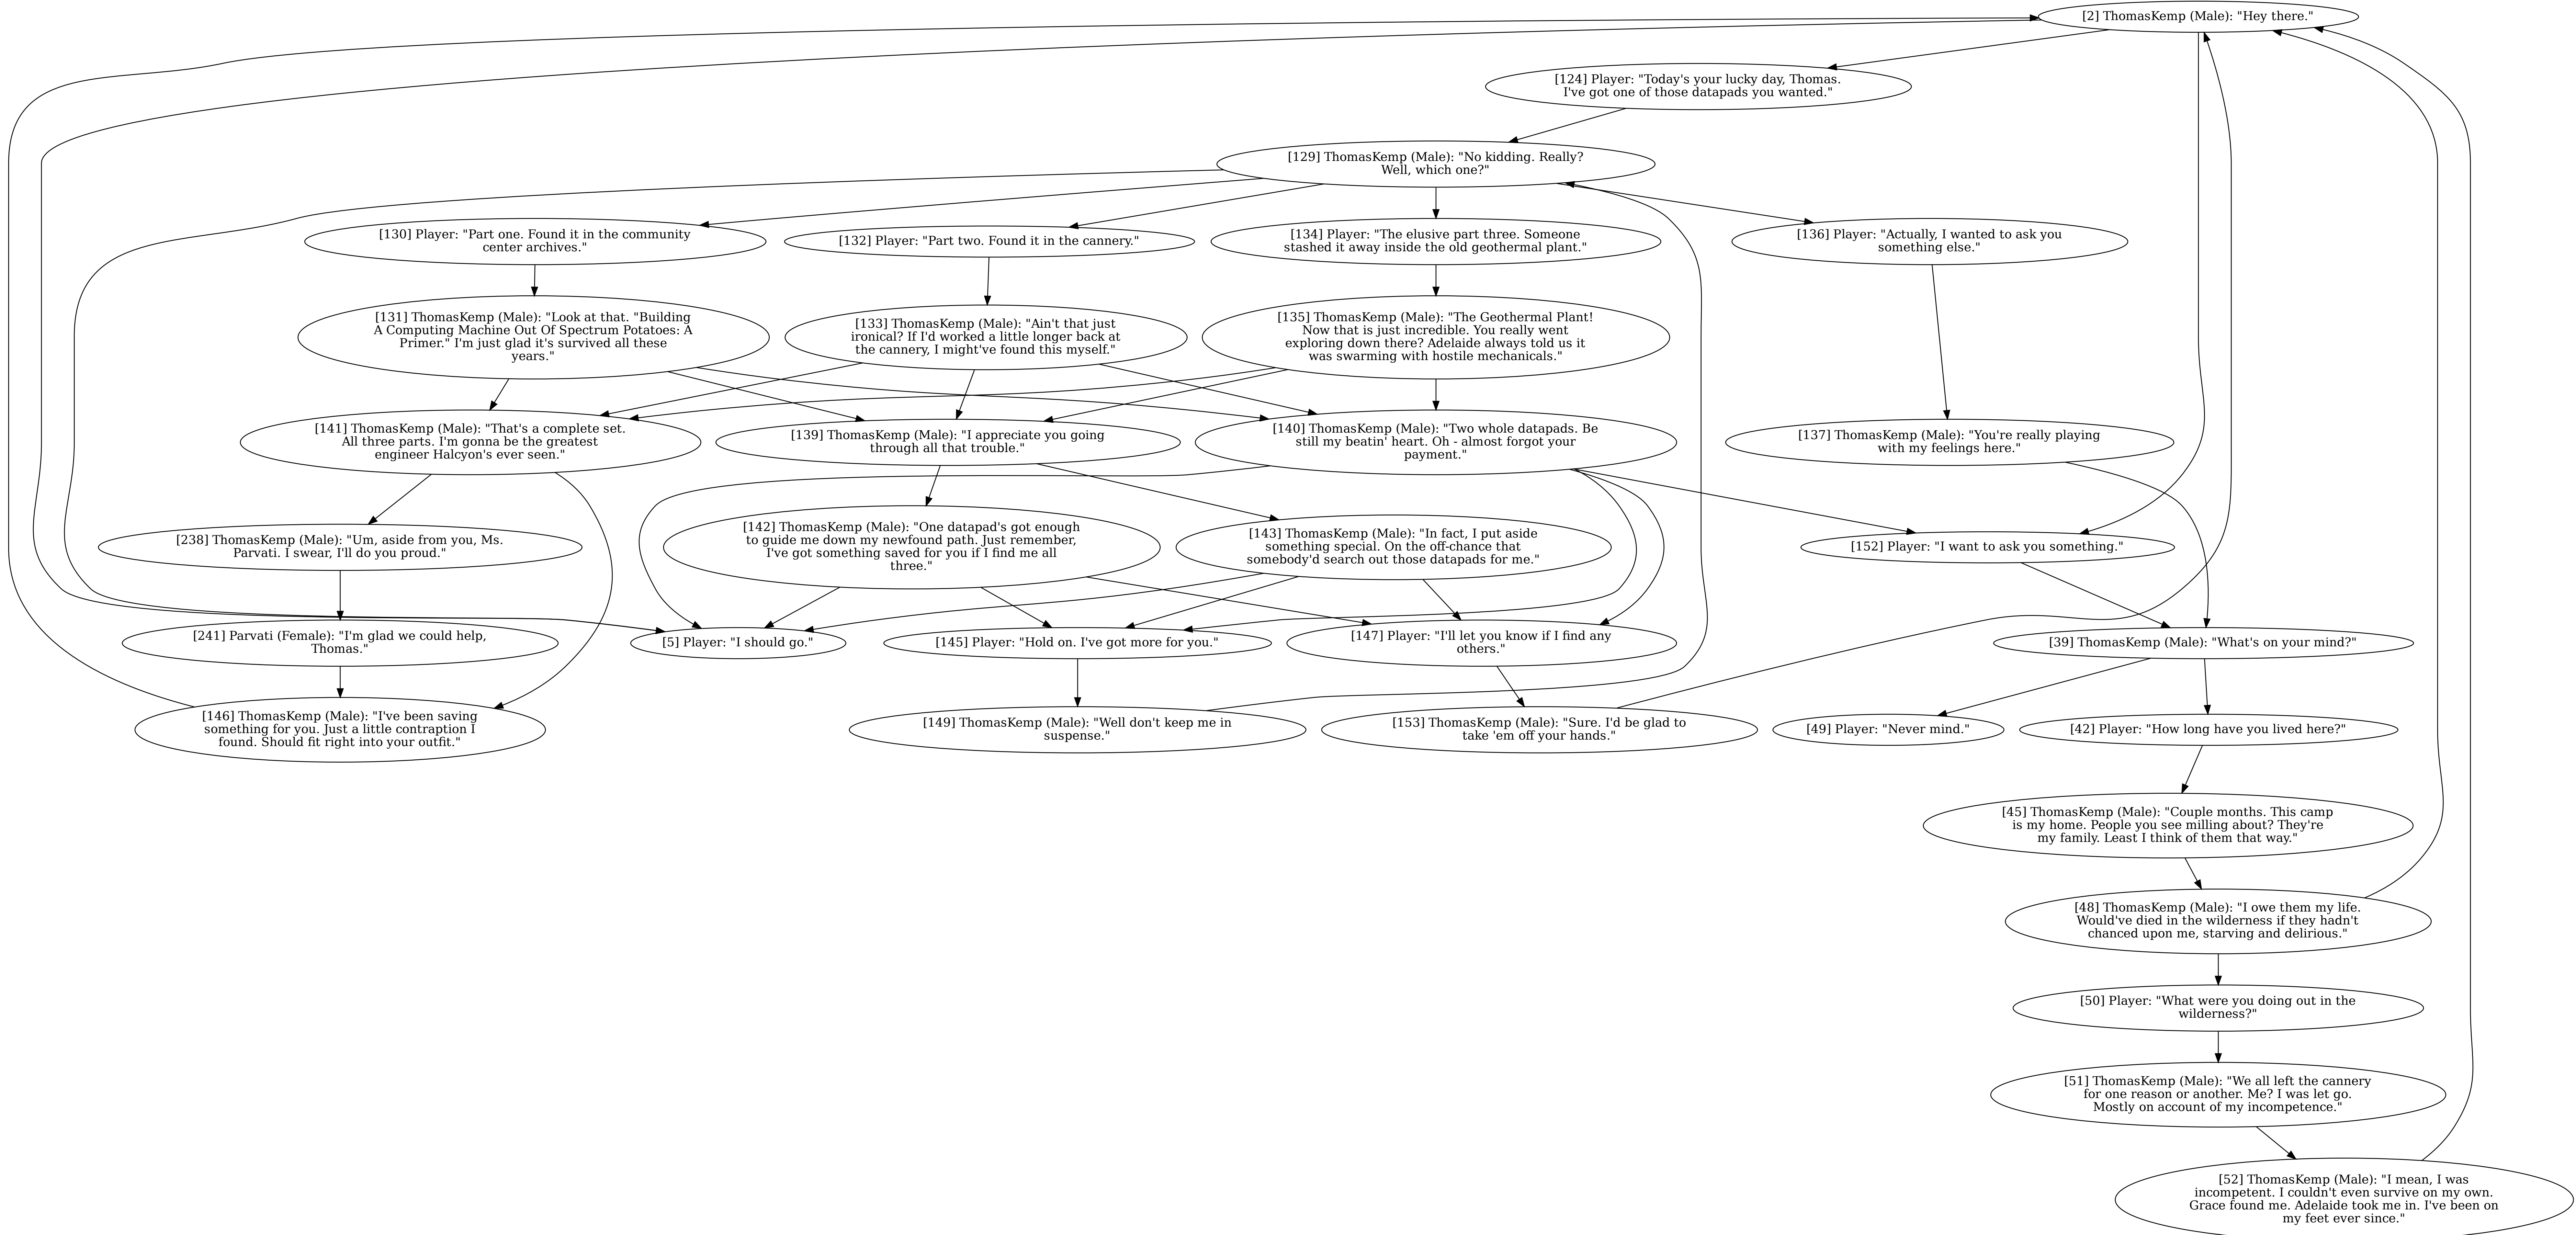

Supplement: software [file 2024.emnlp-main.520.software.zip]

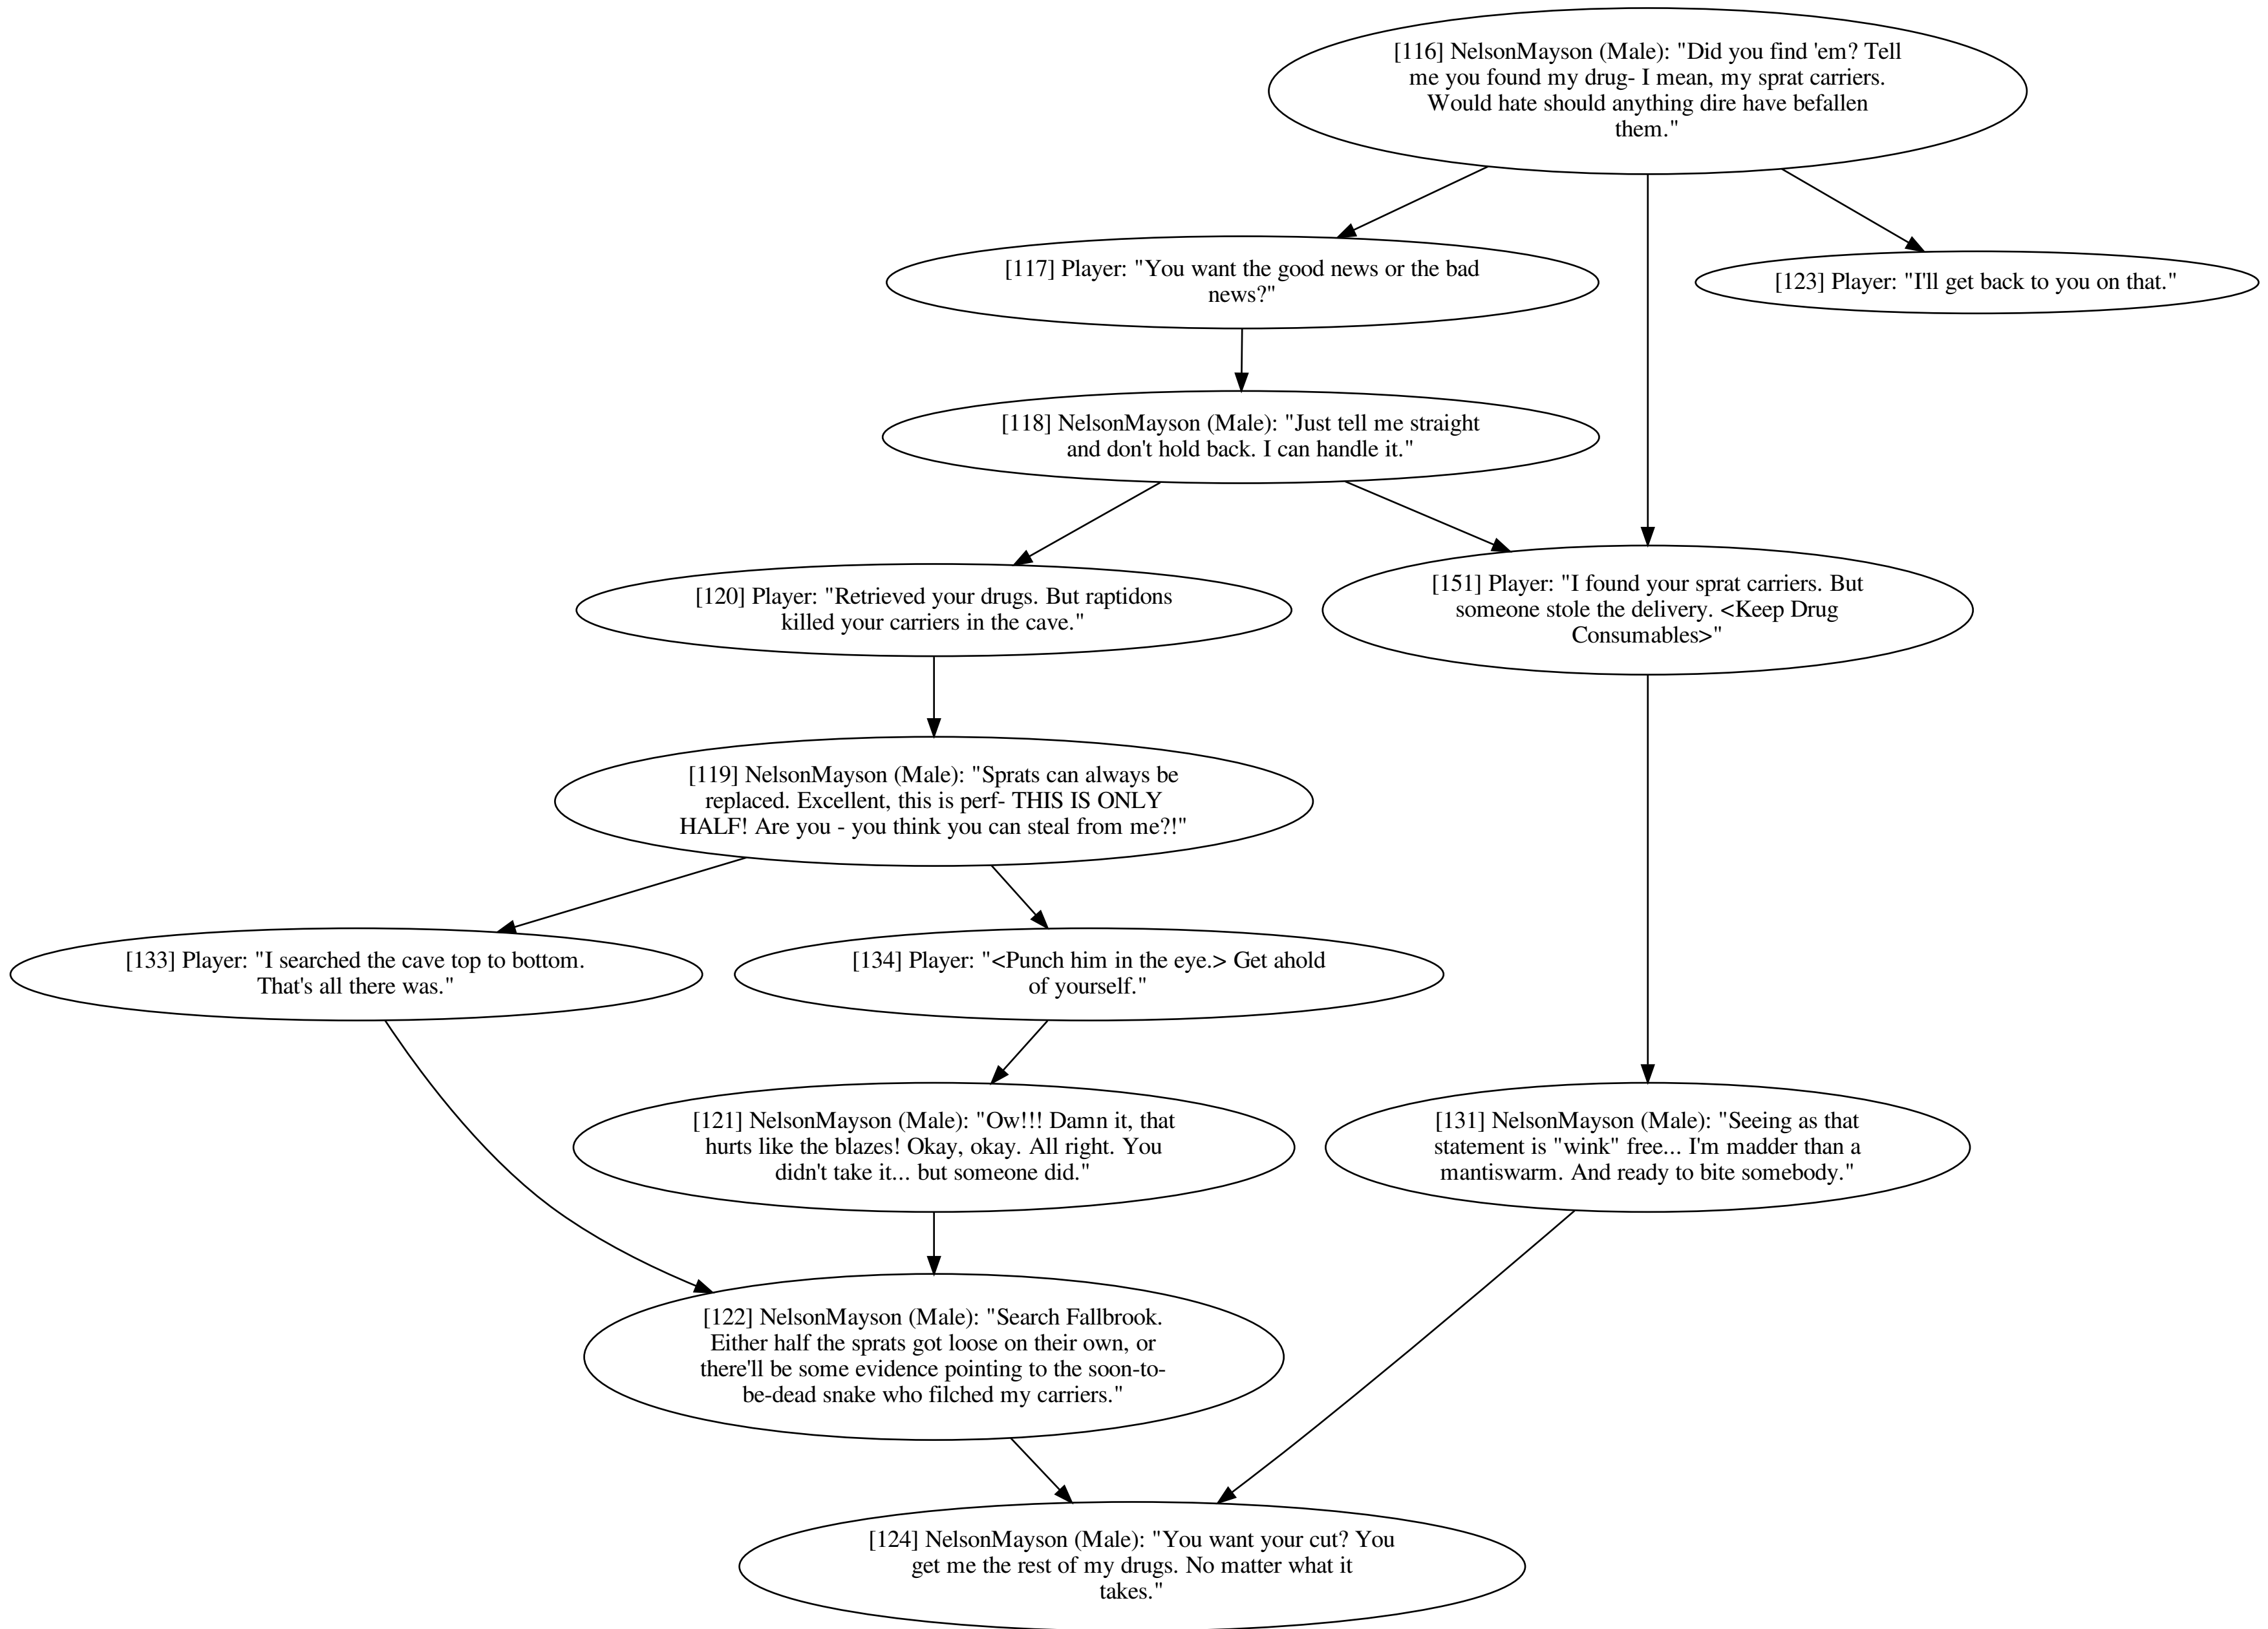

Supplement: software [file 2024.emnlp-main.520.software.zip]

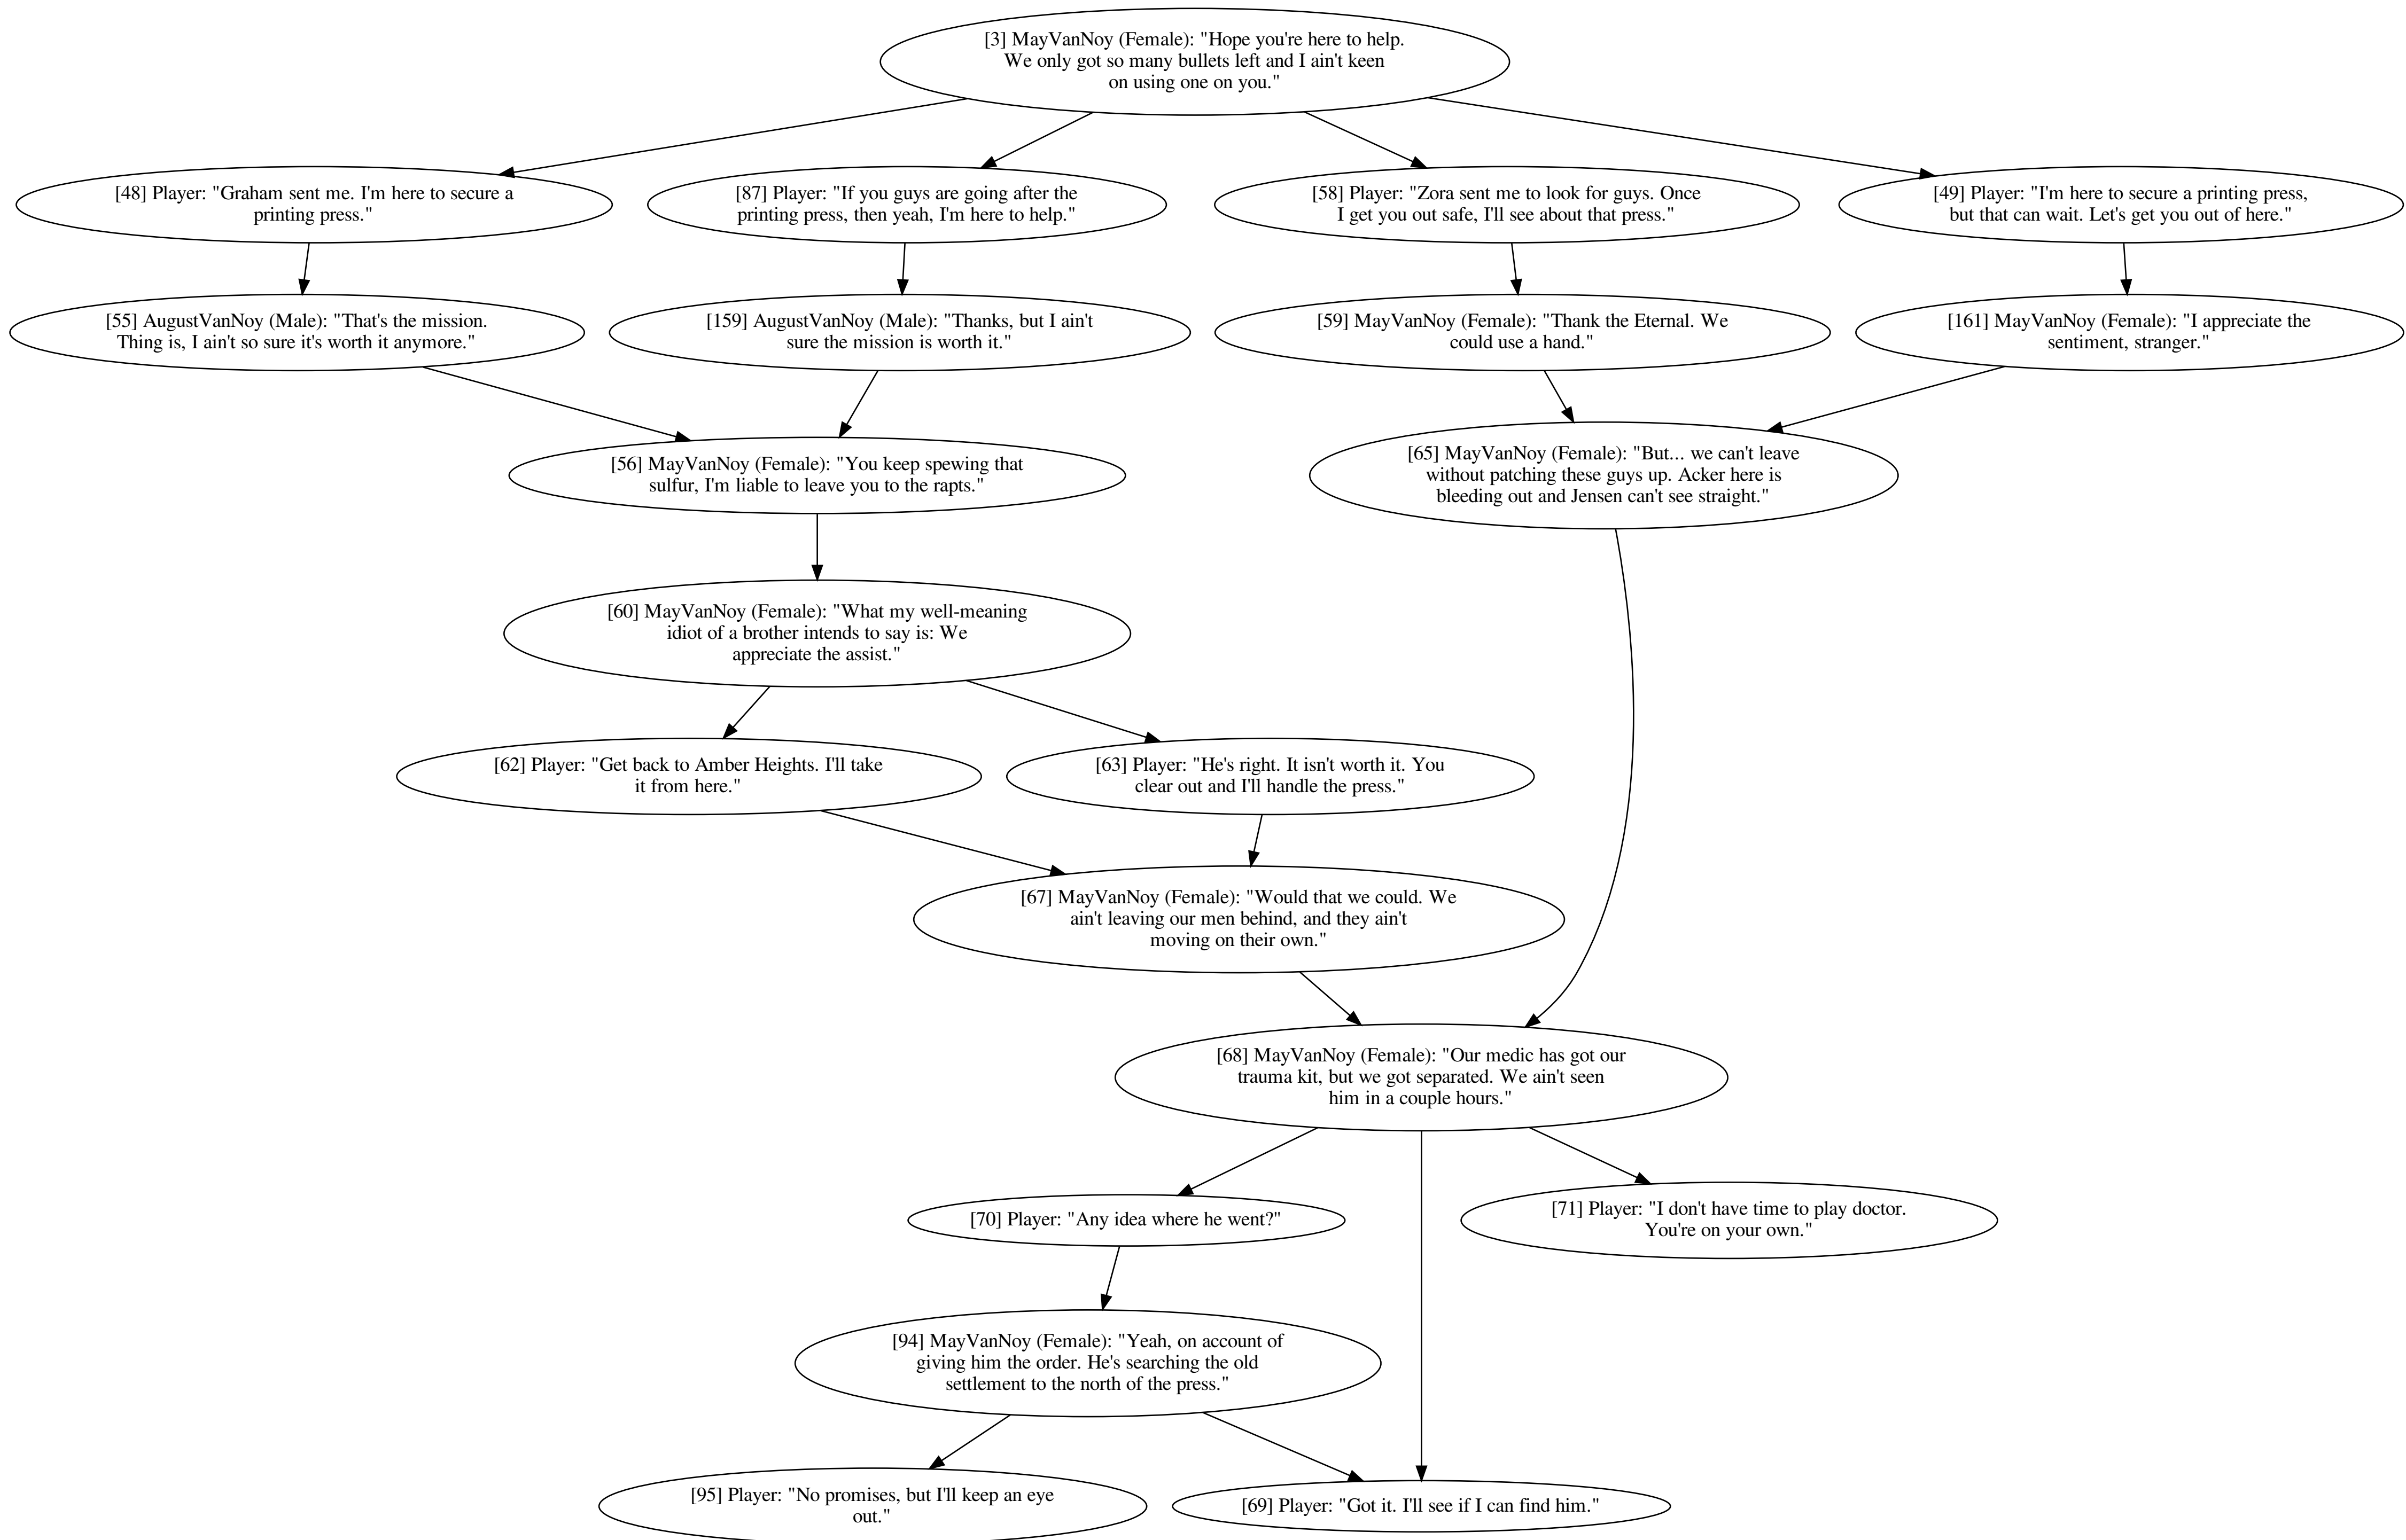

Supplement: software [file 2024.emnlp-main.520.software.zip]

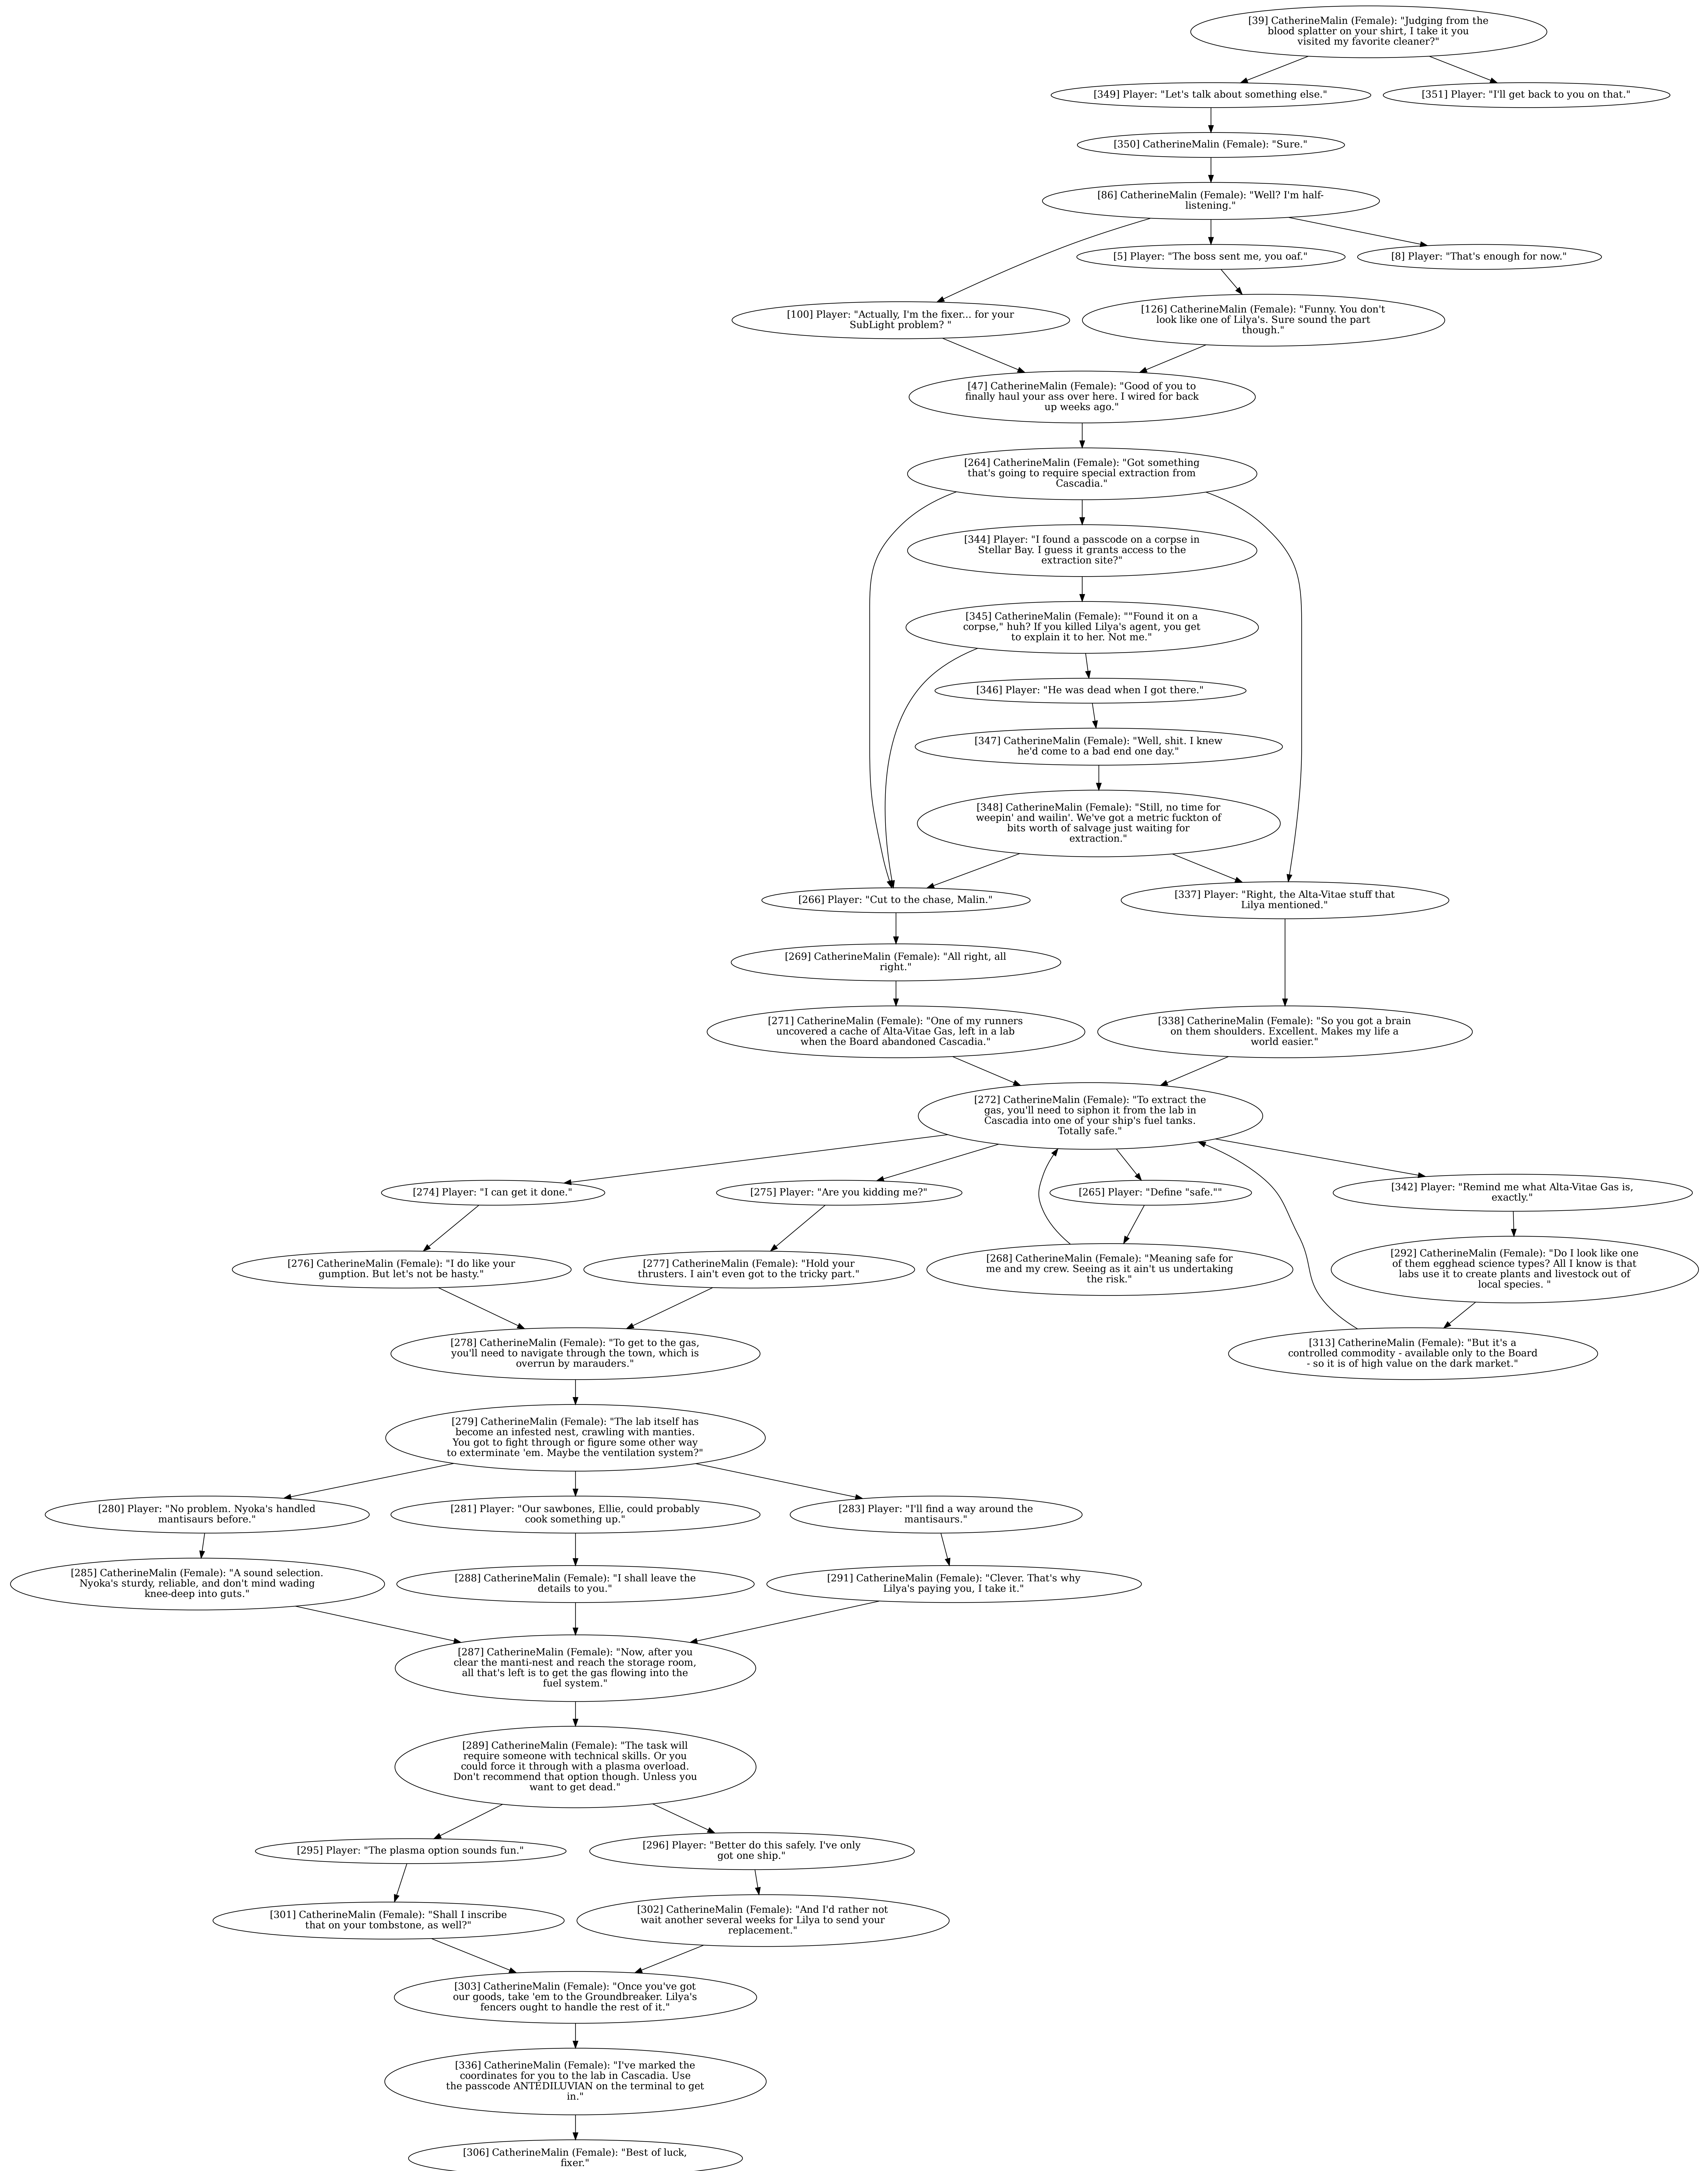

Supplement: software [file 2024.emnlp-main.520.software.zip]

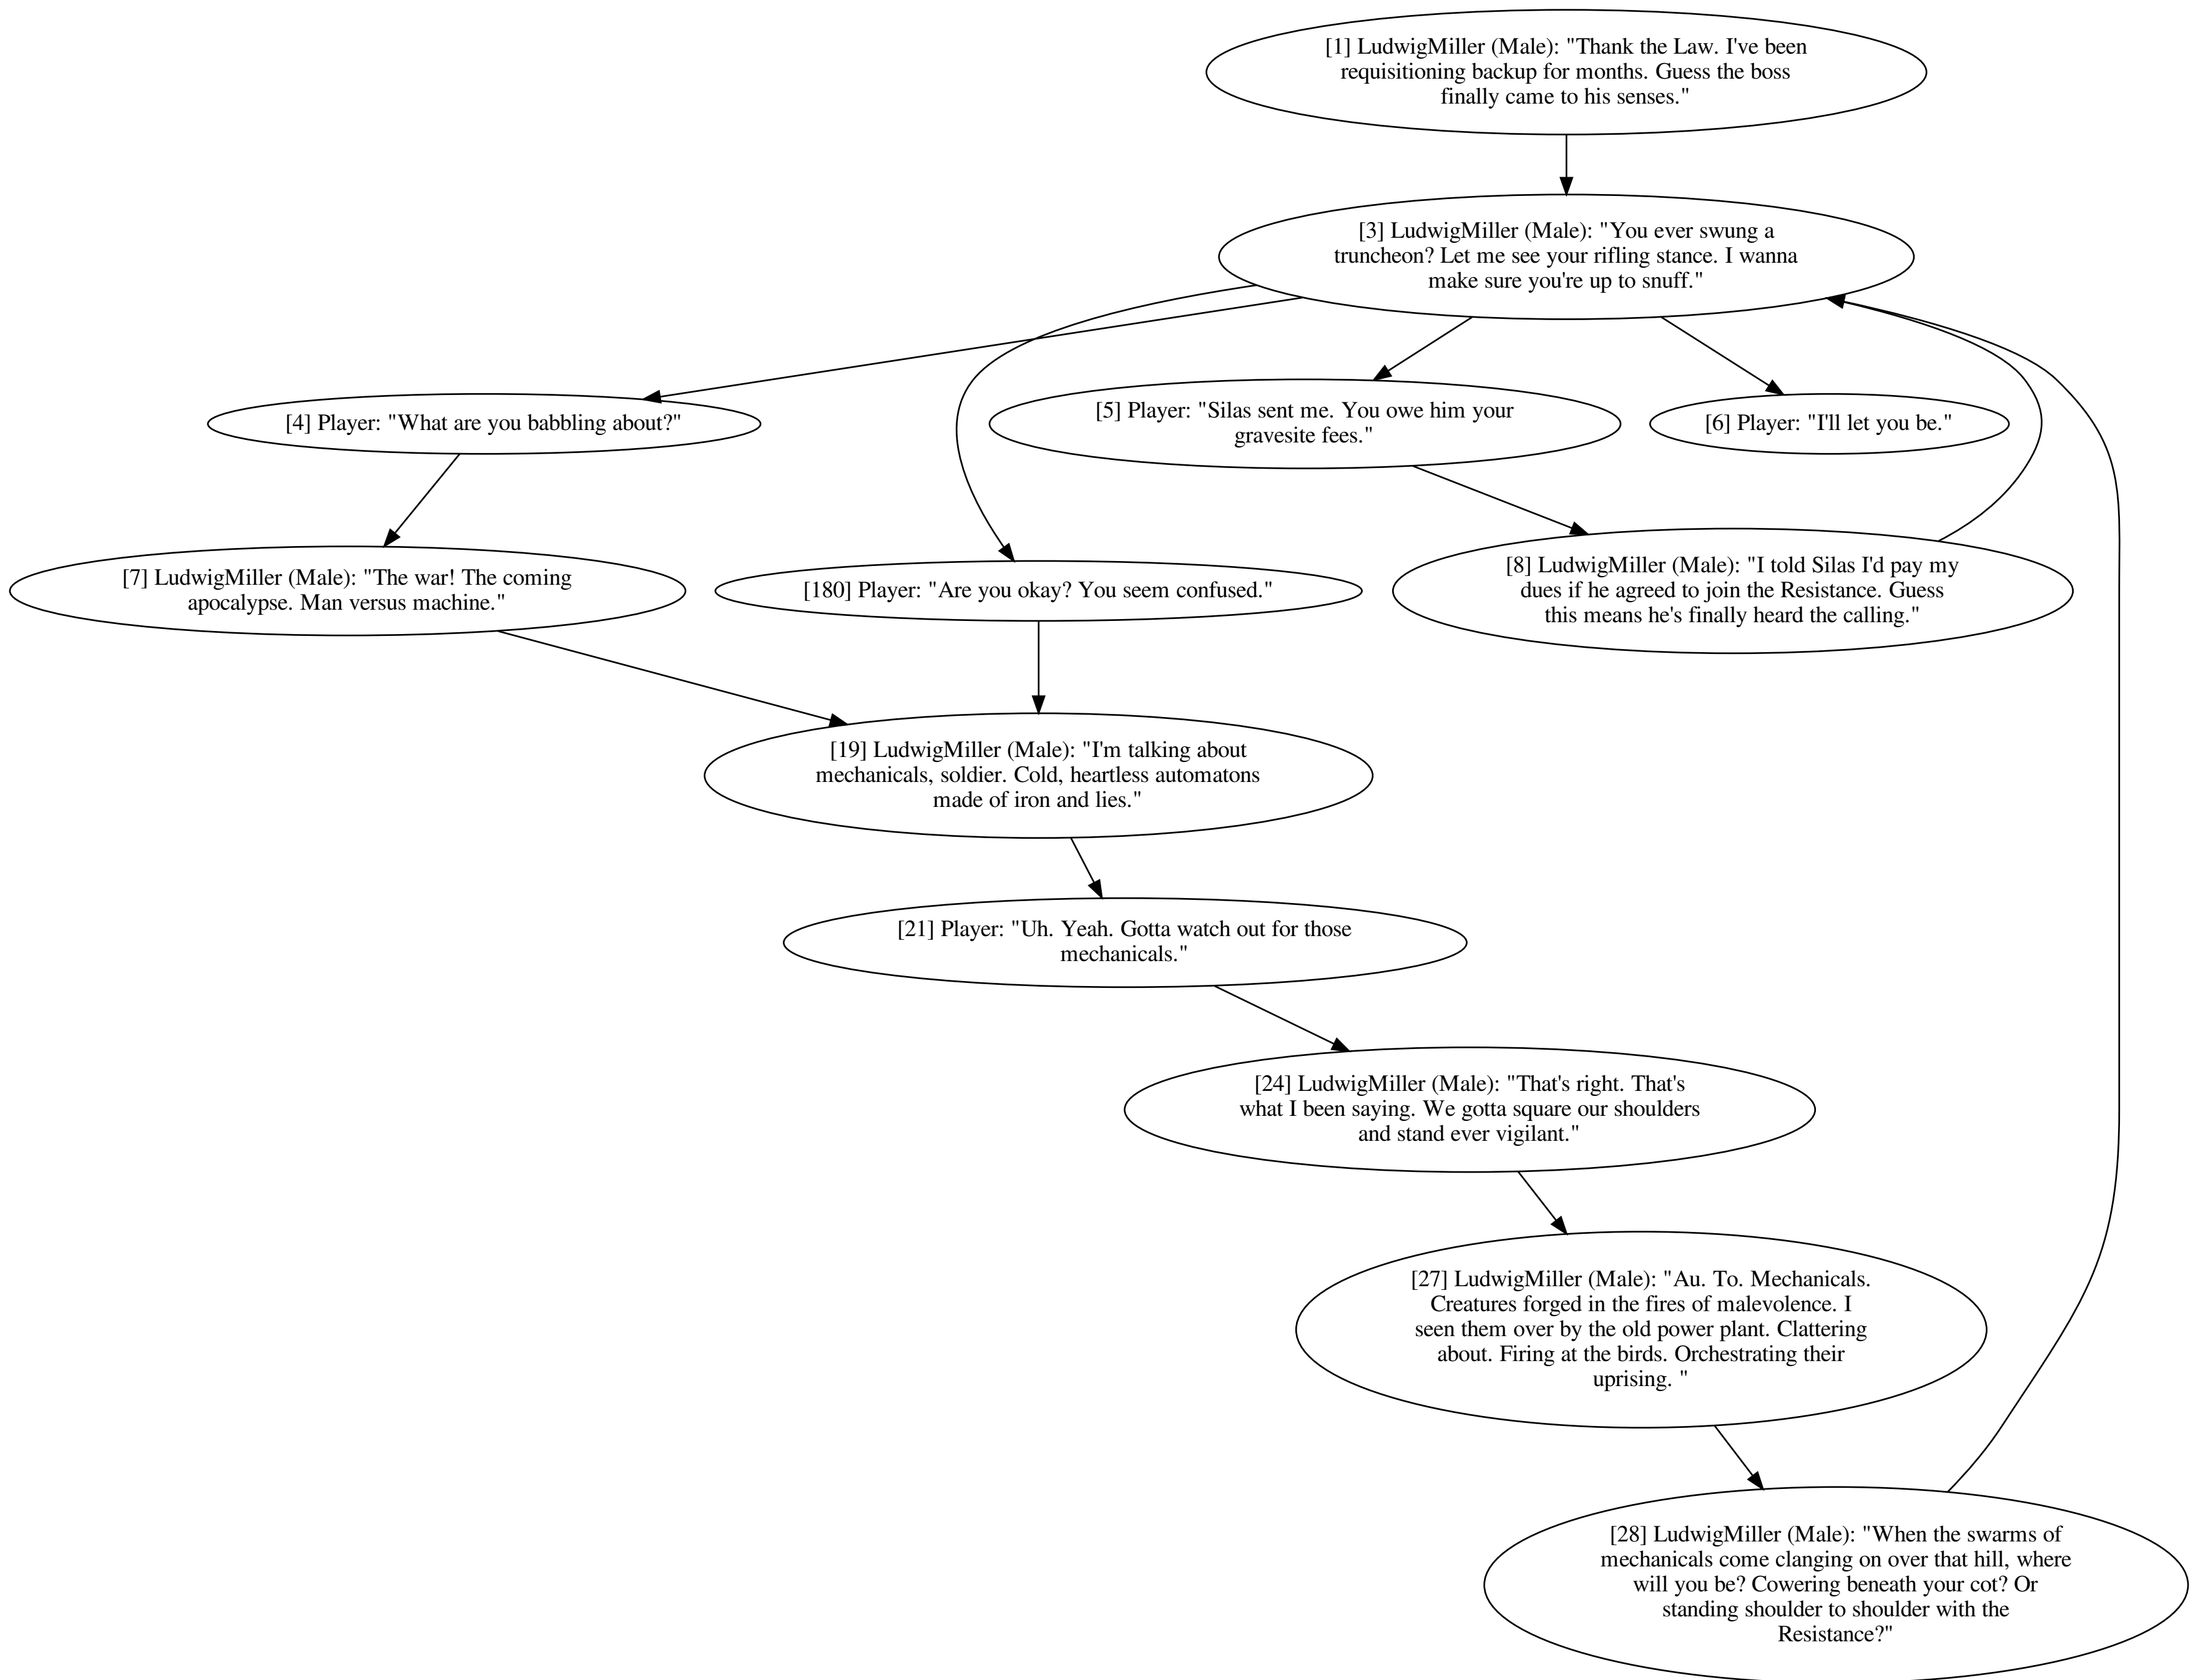

Supplement: software [file 2024.emnlp-main.520.software.zip]

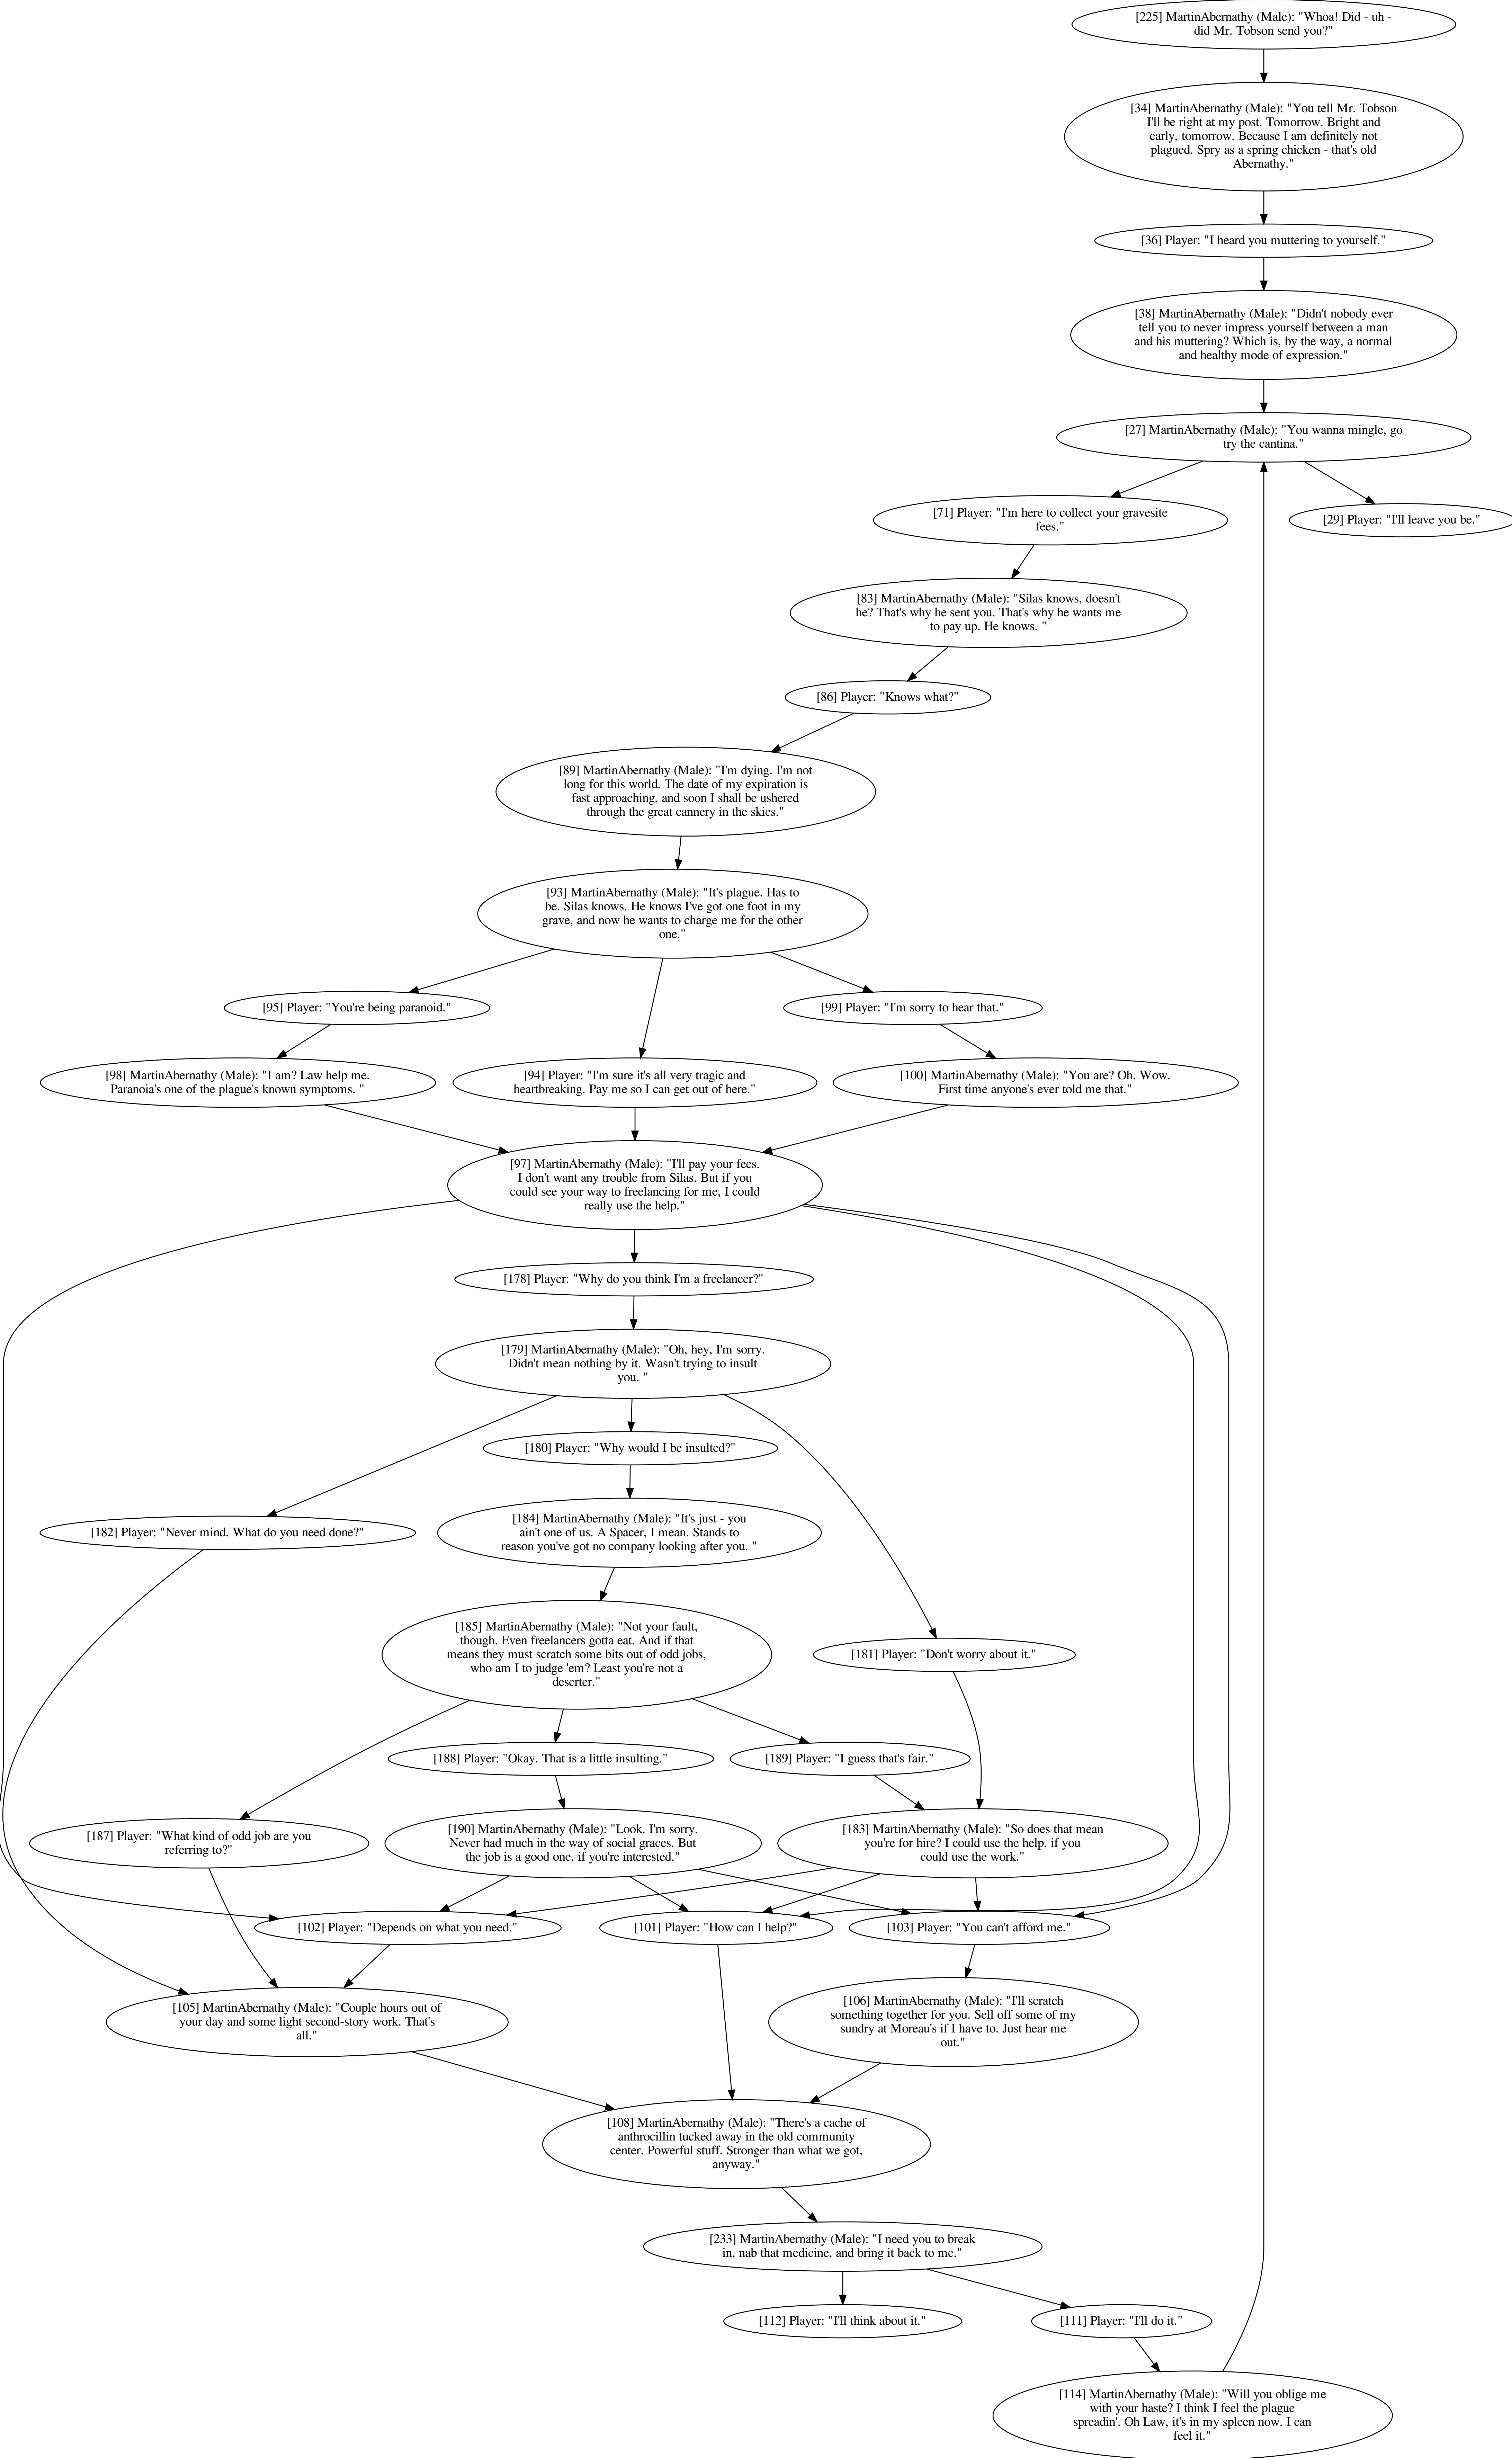

Supplement: software [file 2024.emnlp-main.520.software.zip]

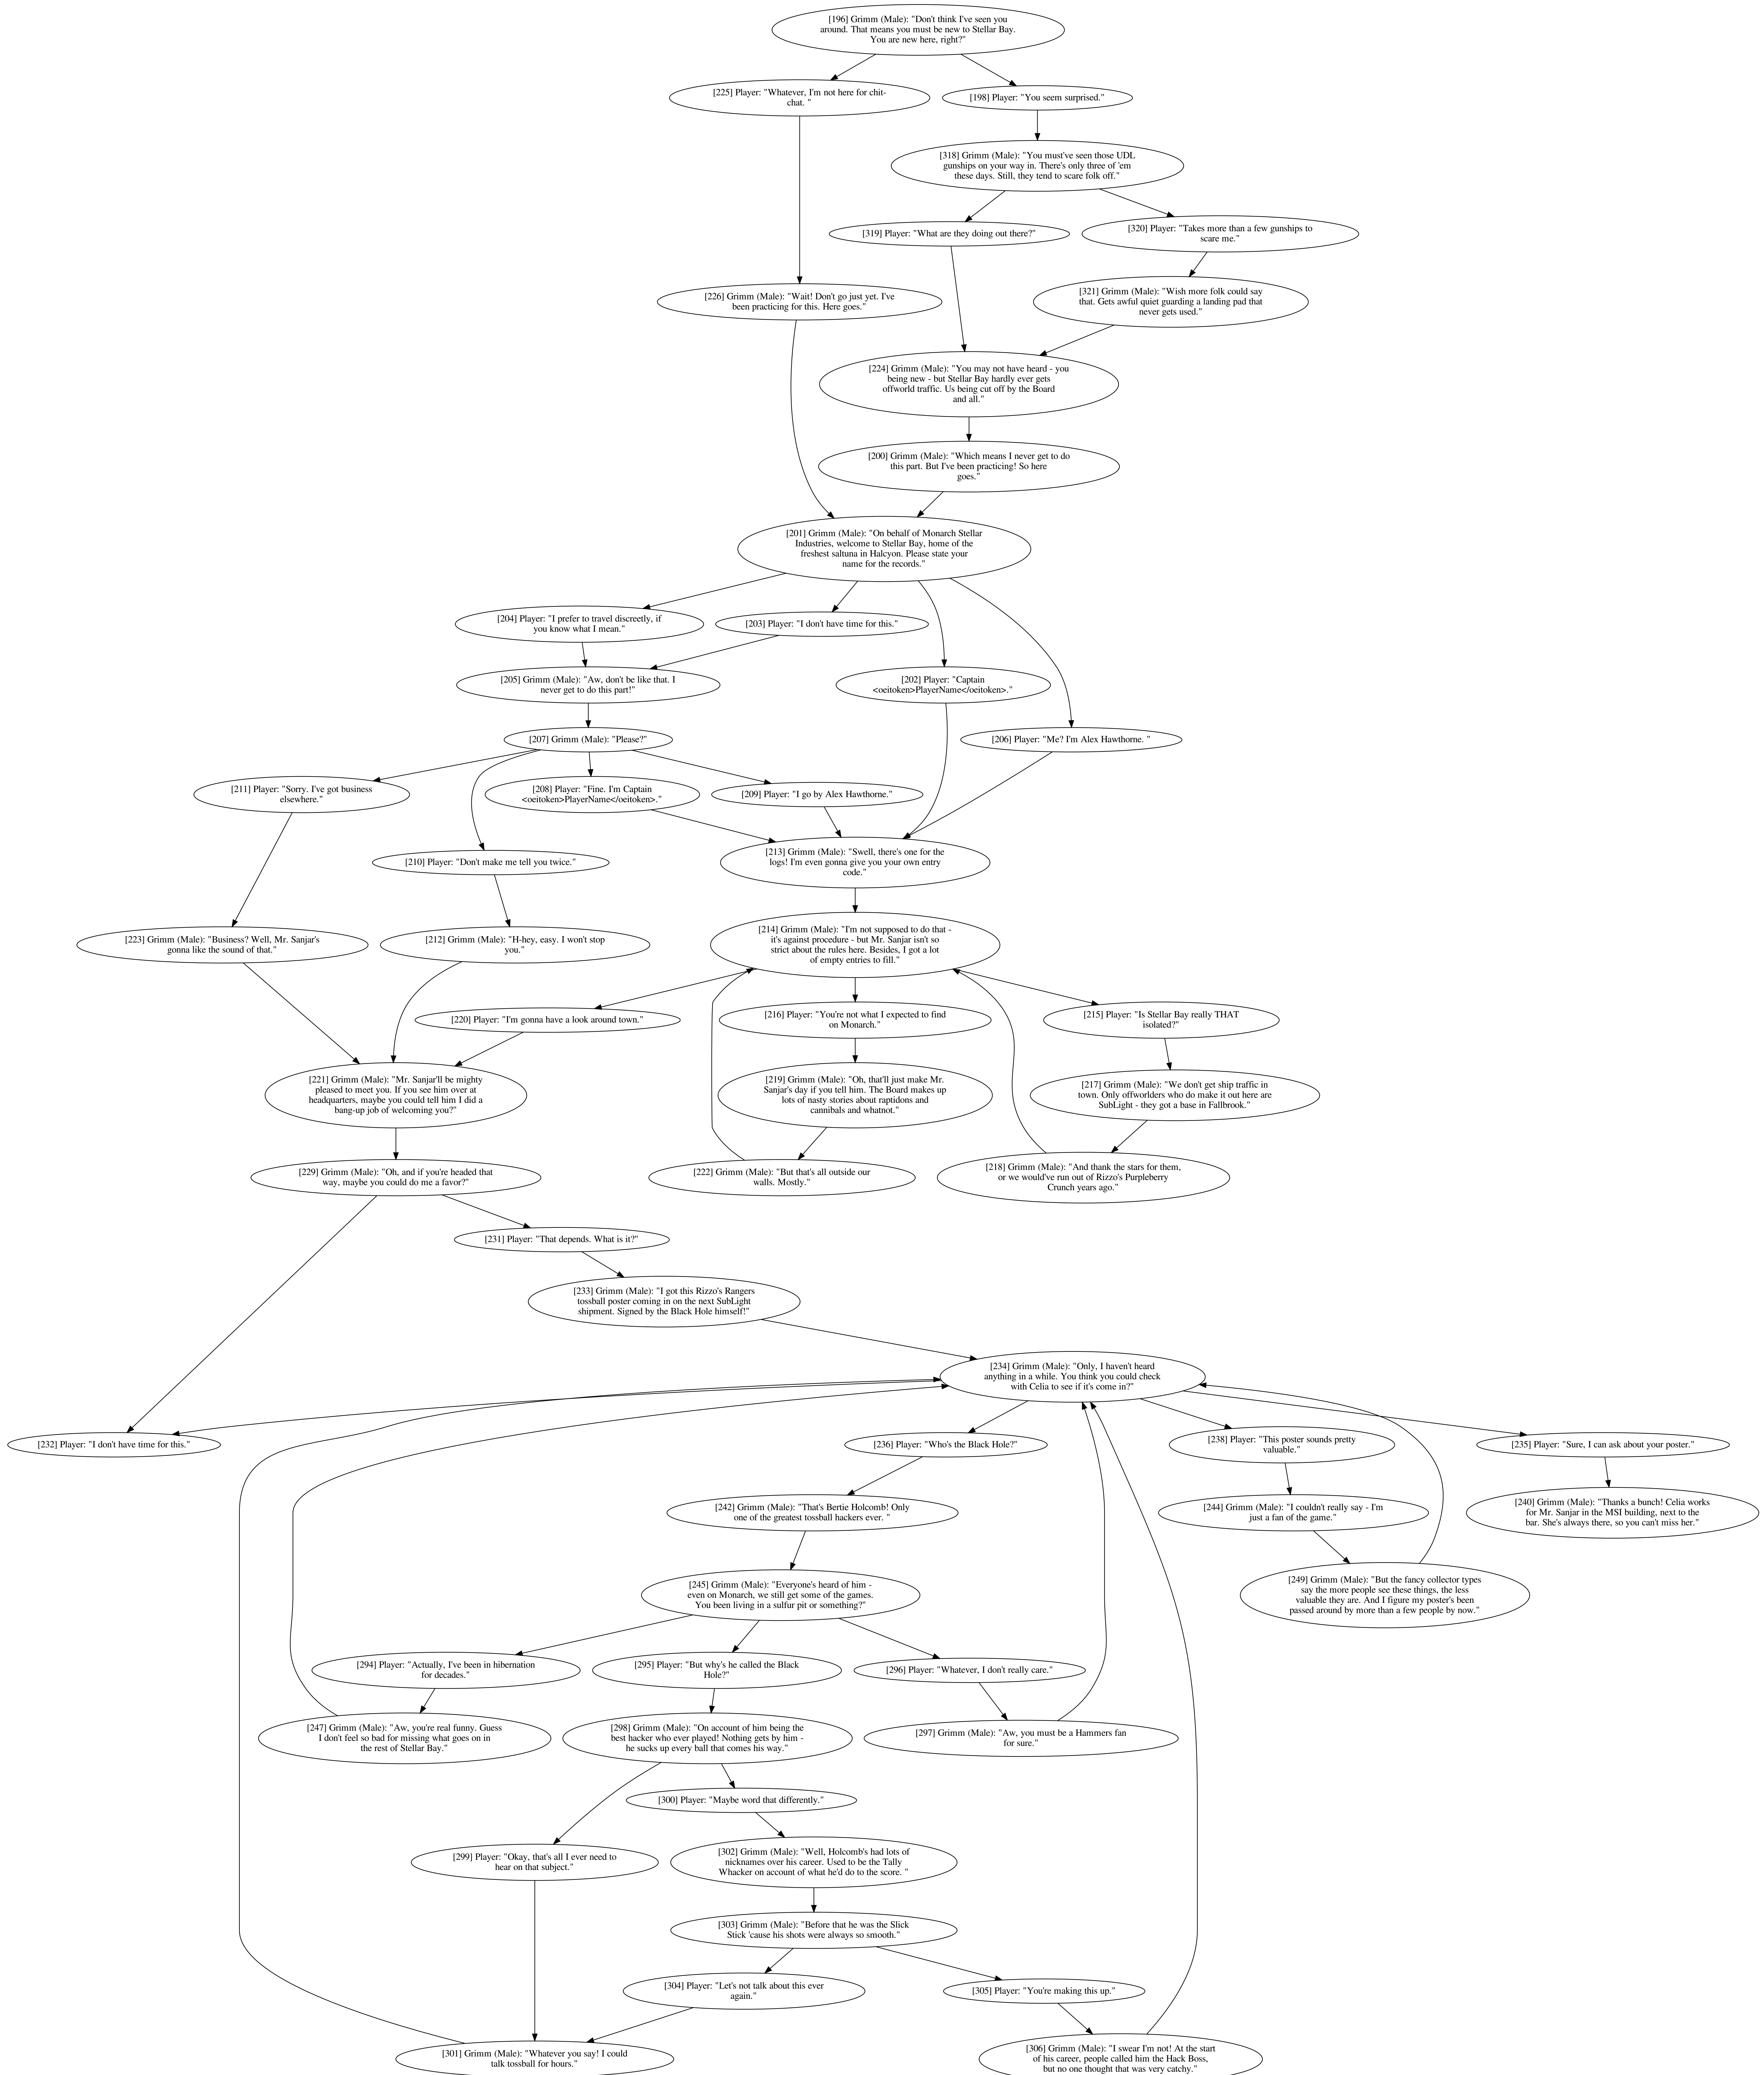

Supplement: software [file 2024.emnlp-main.520.software.zip]

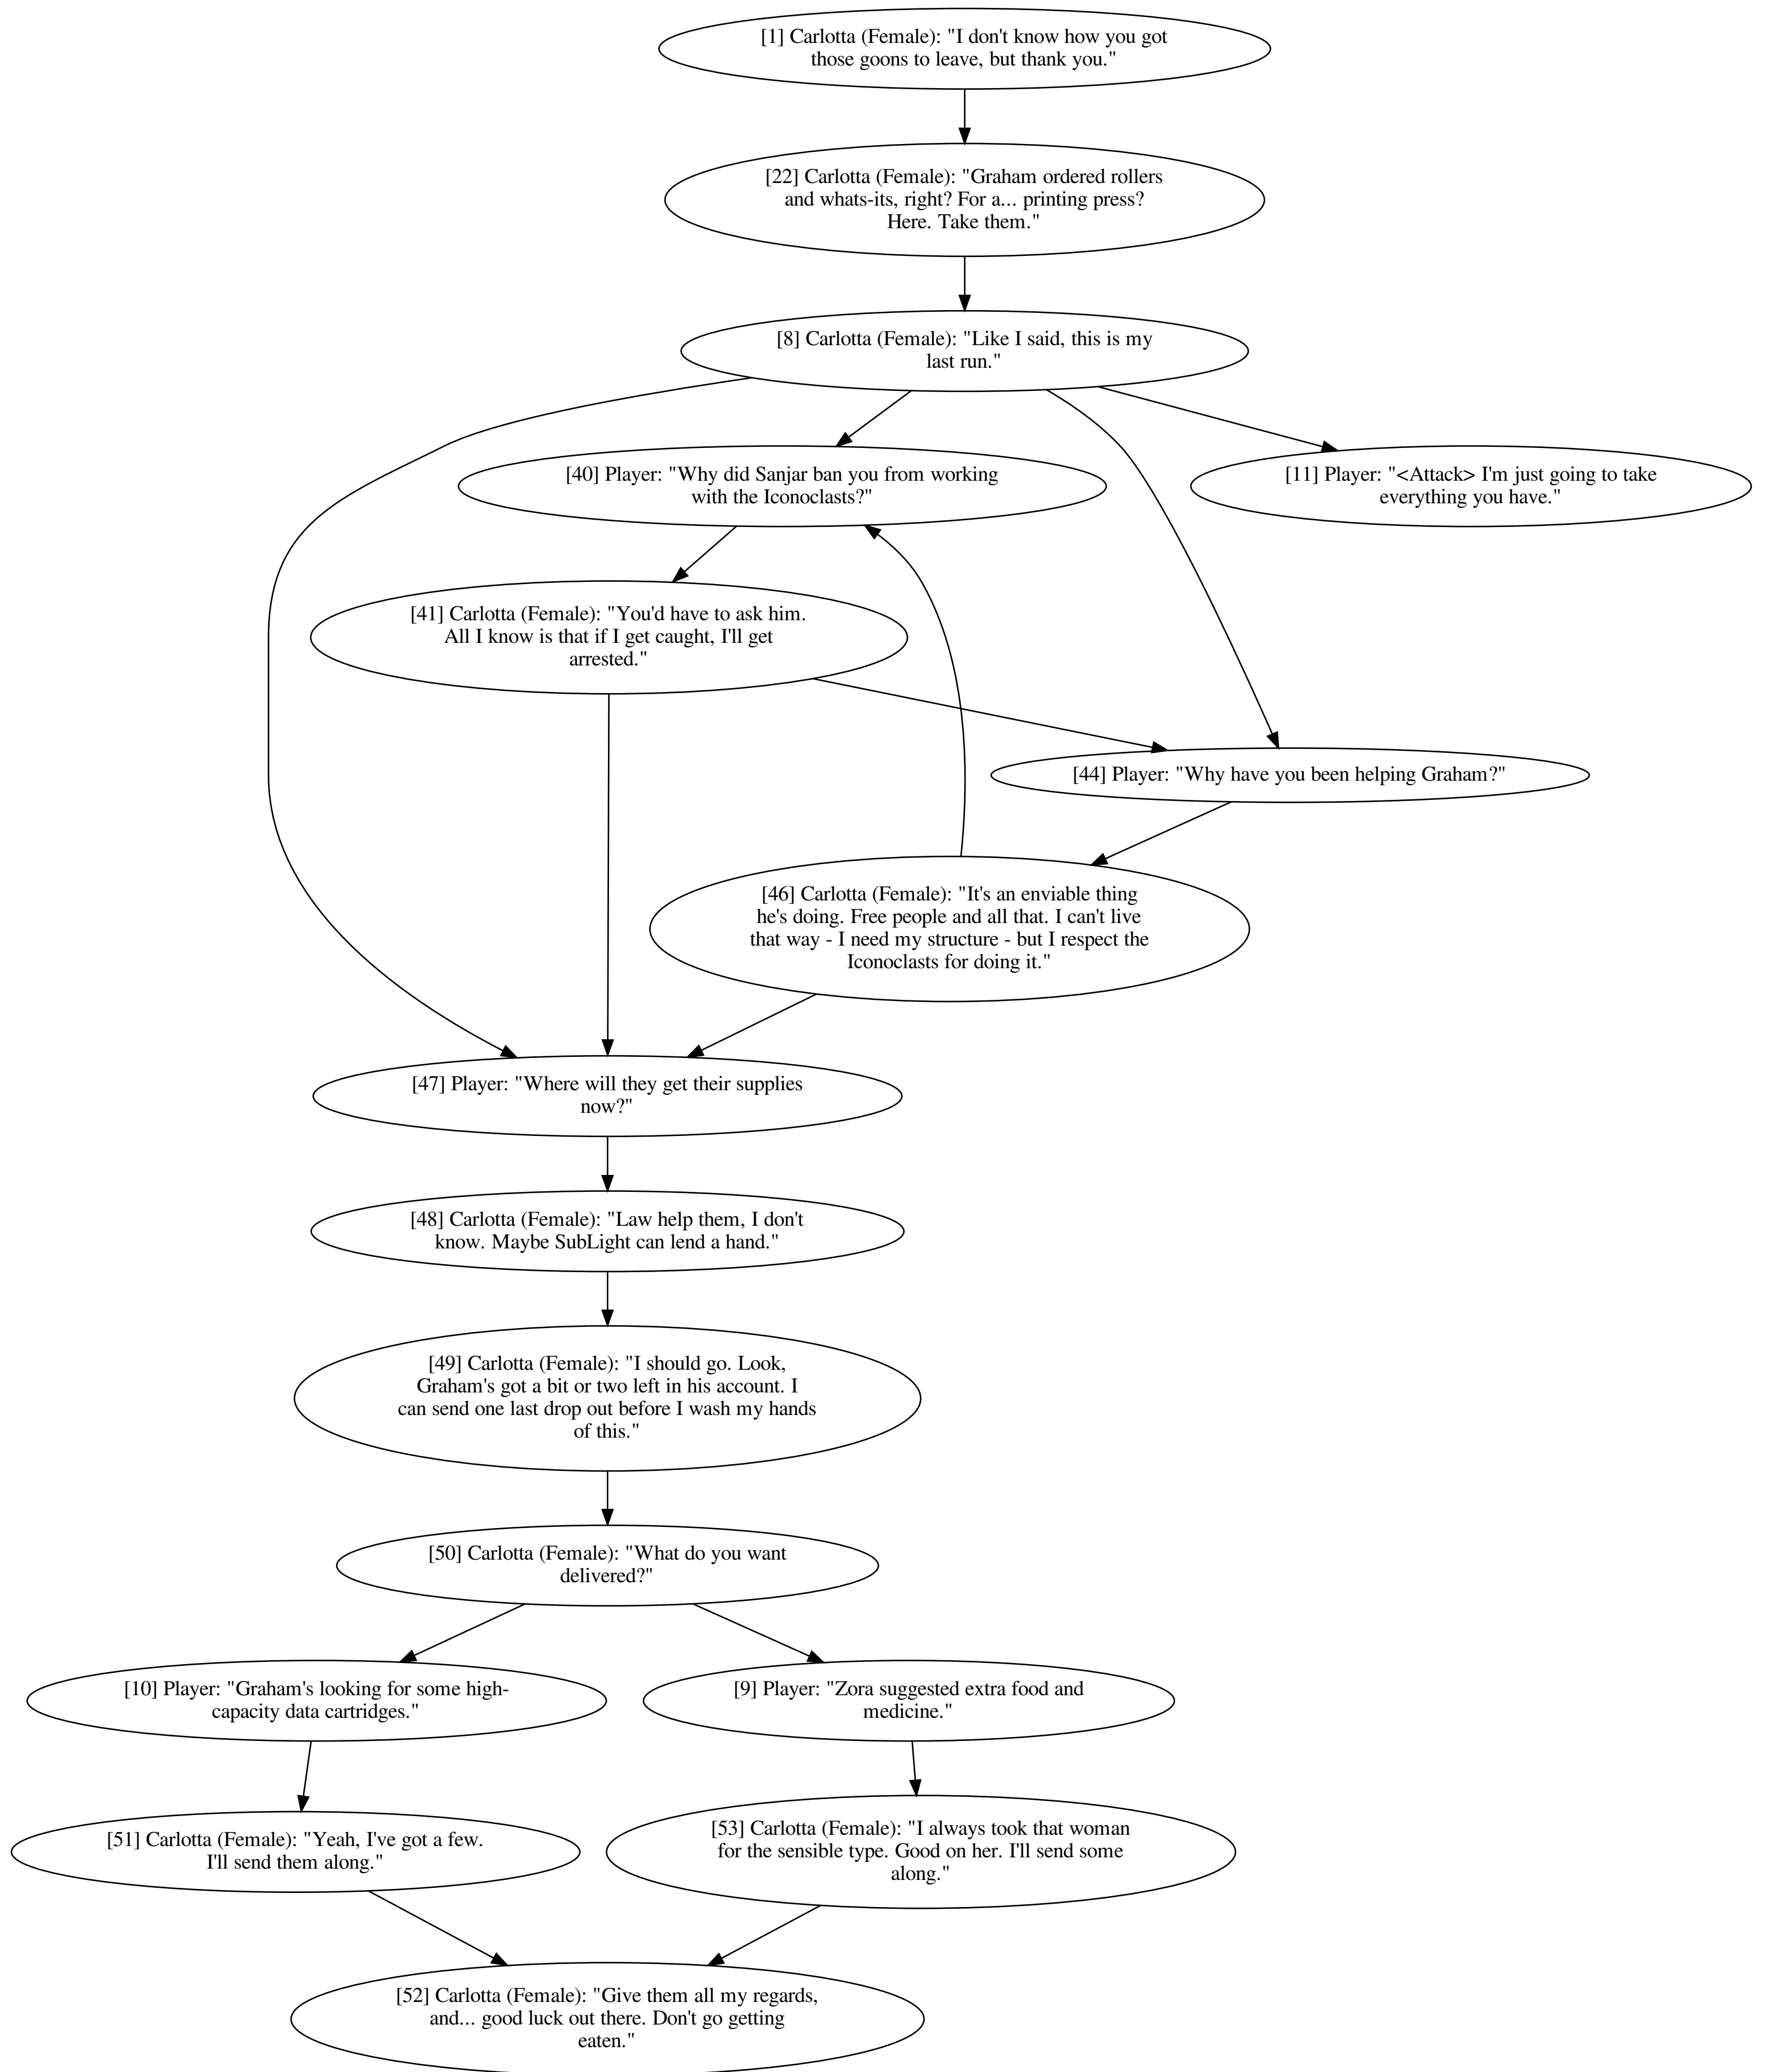

Supplement: software [file 2024.emnlp-main.520.software.zip]

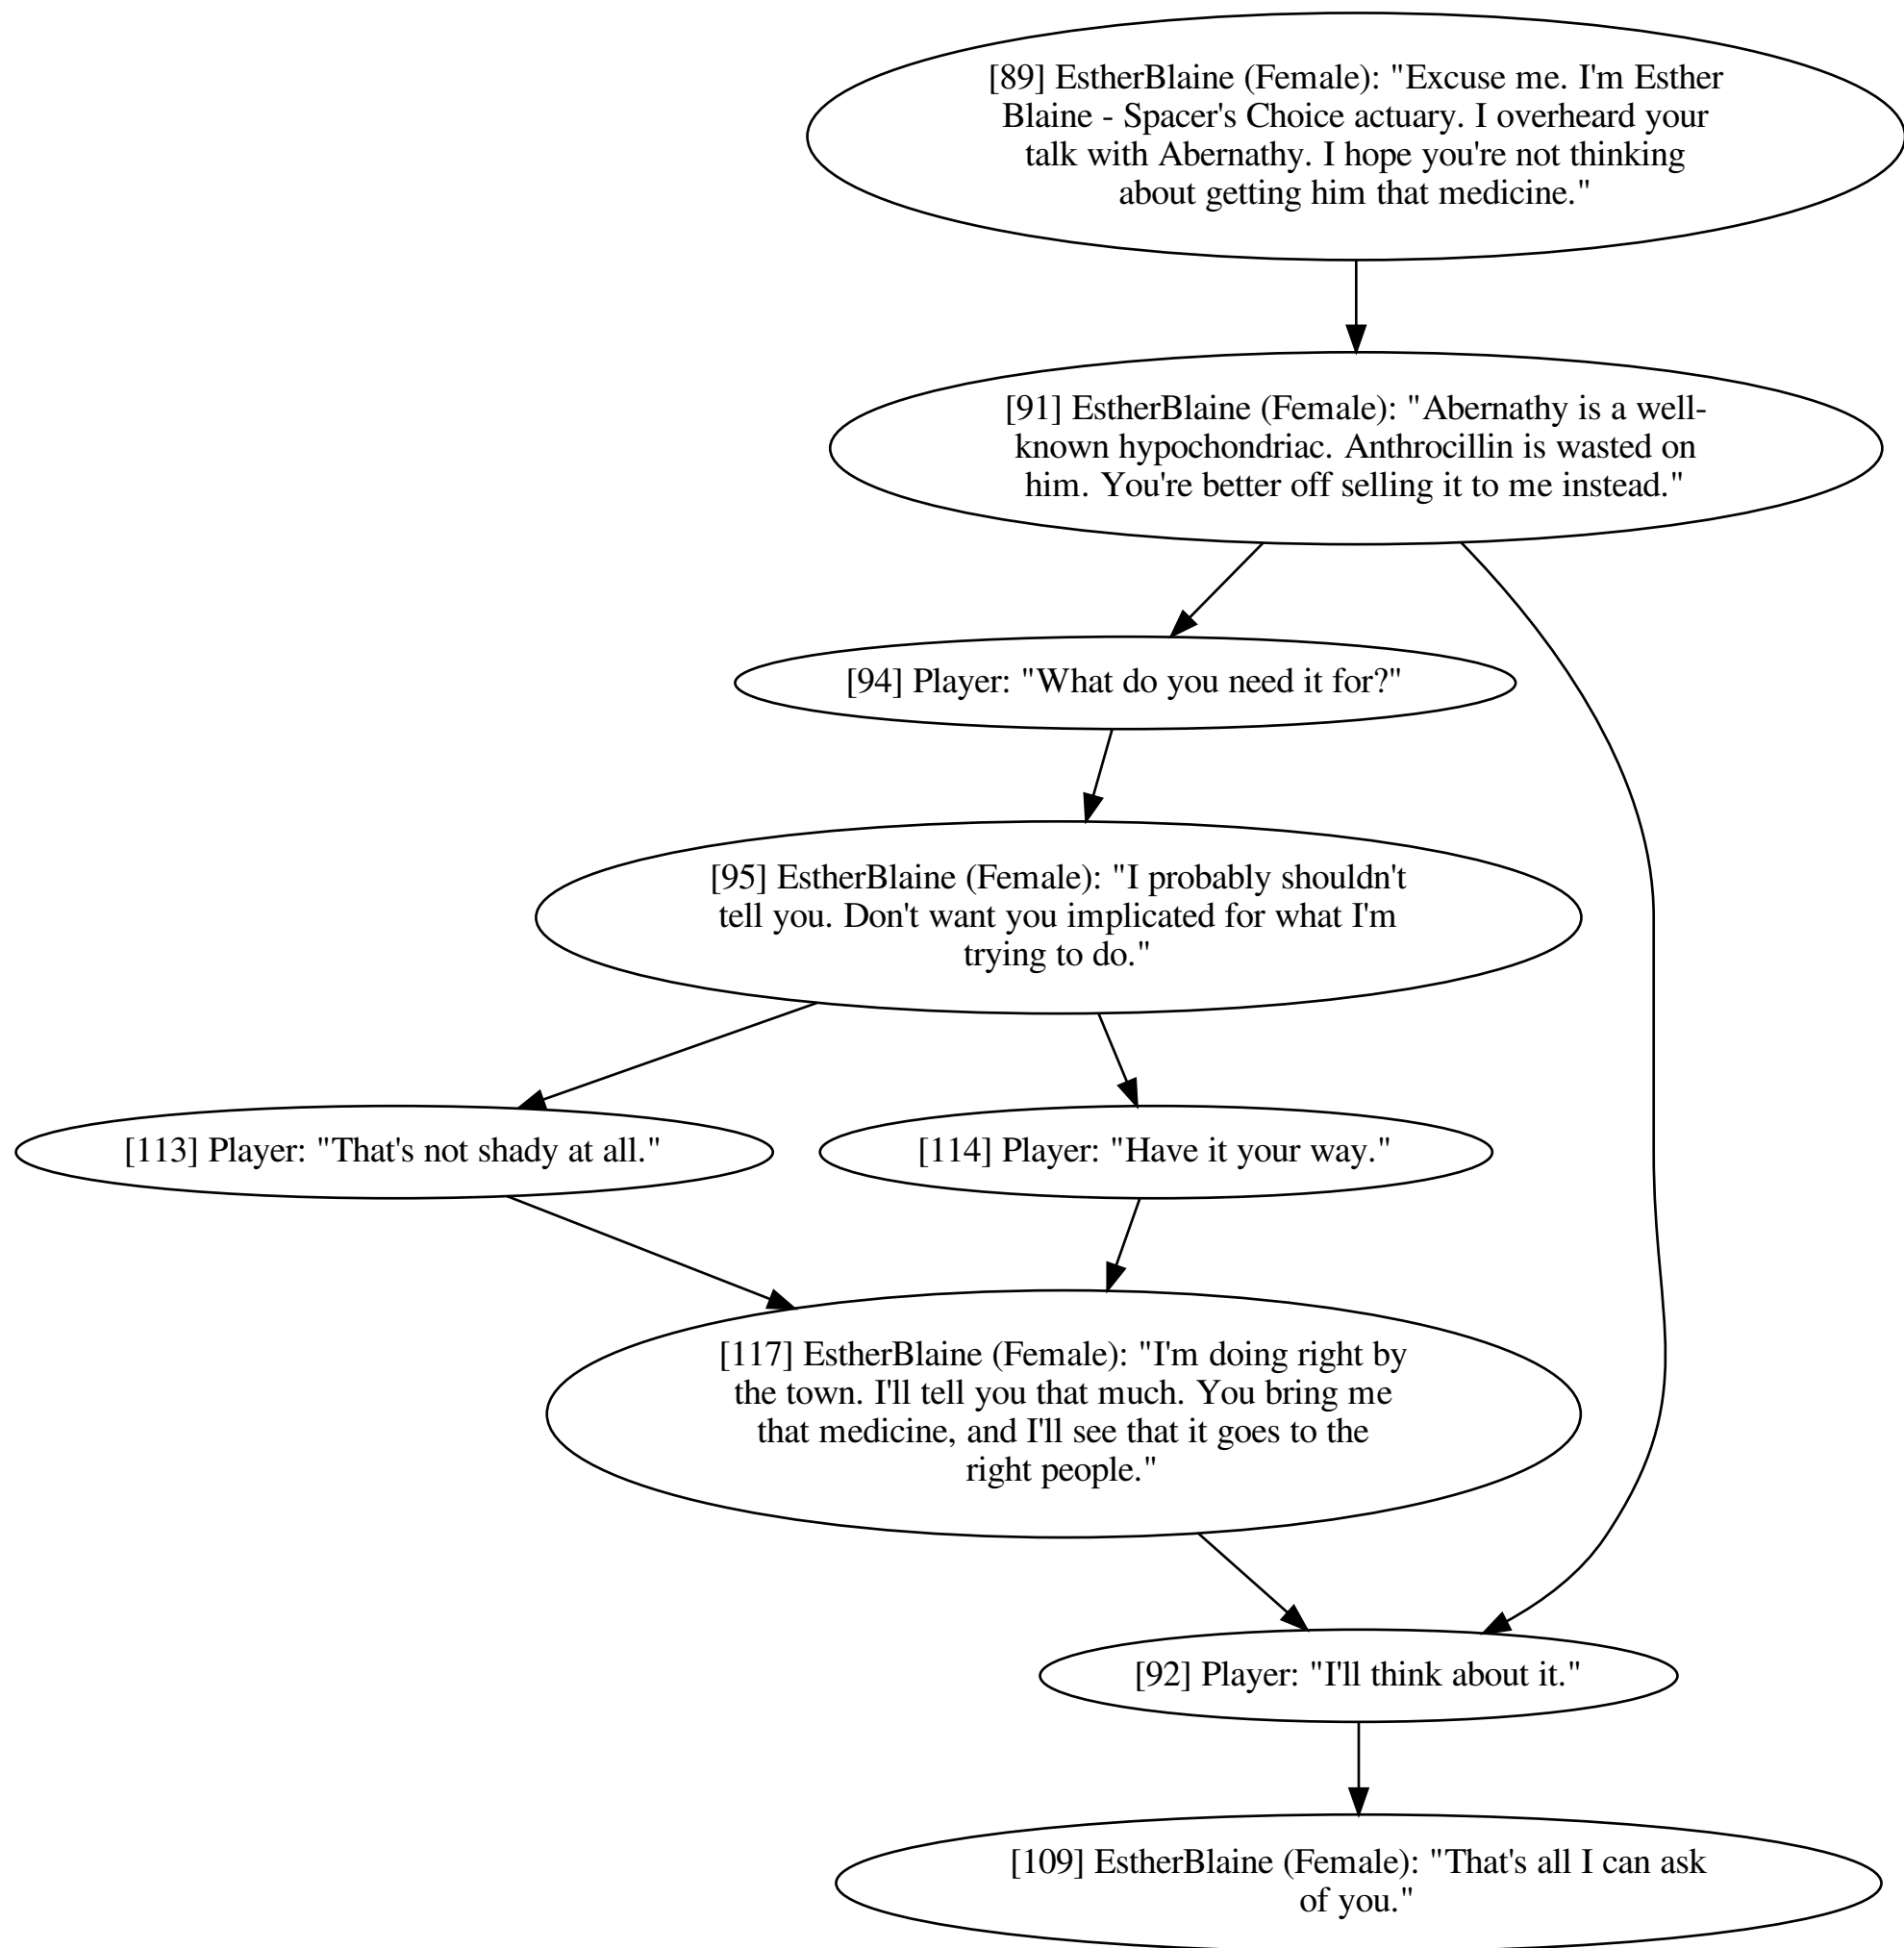

Supplement: software [file 2024.emnlp-main.520.software.zip]

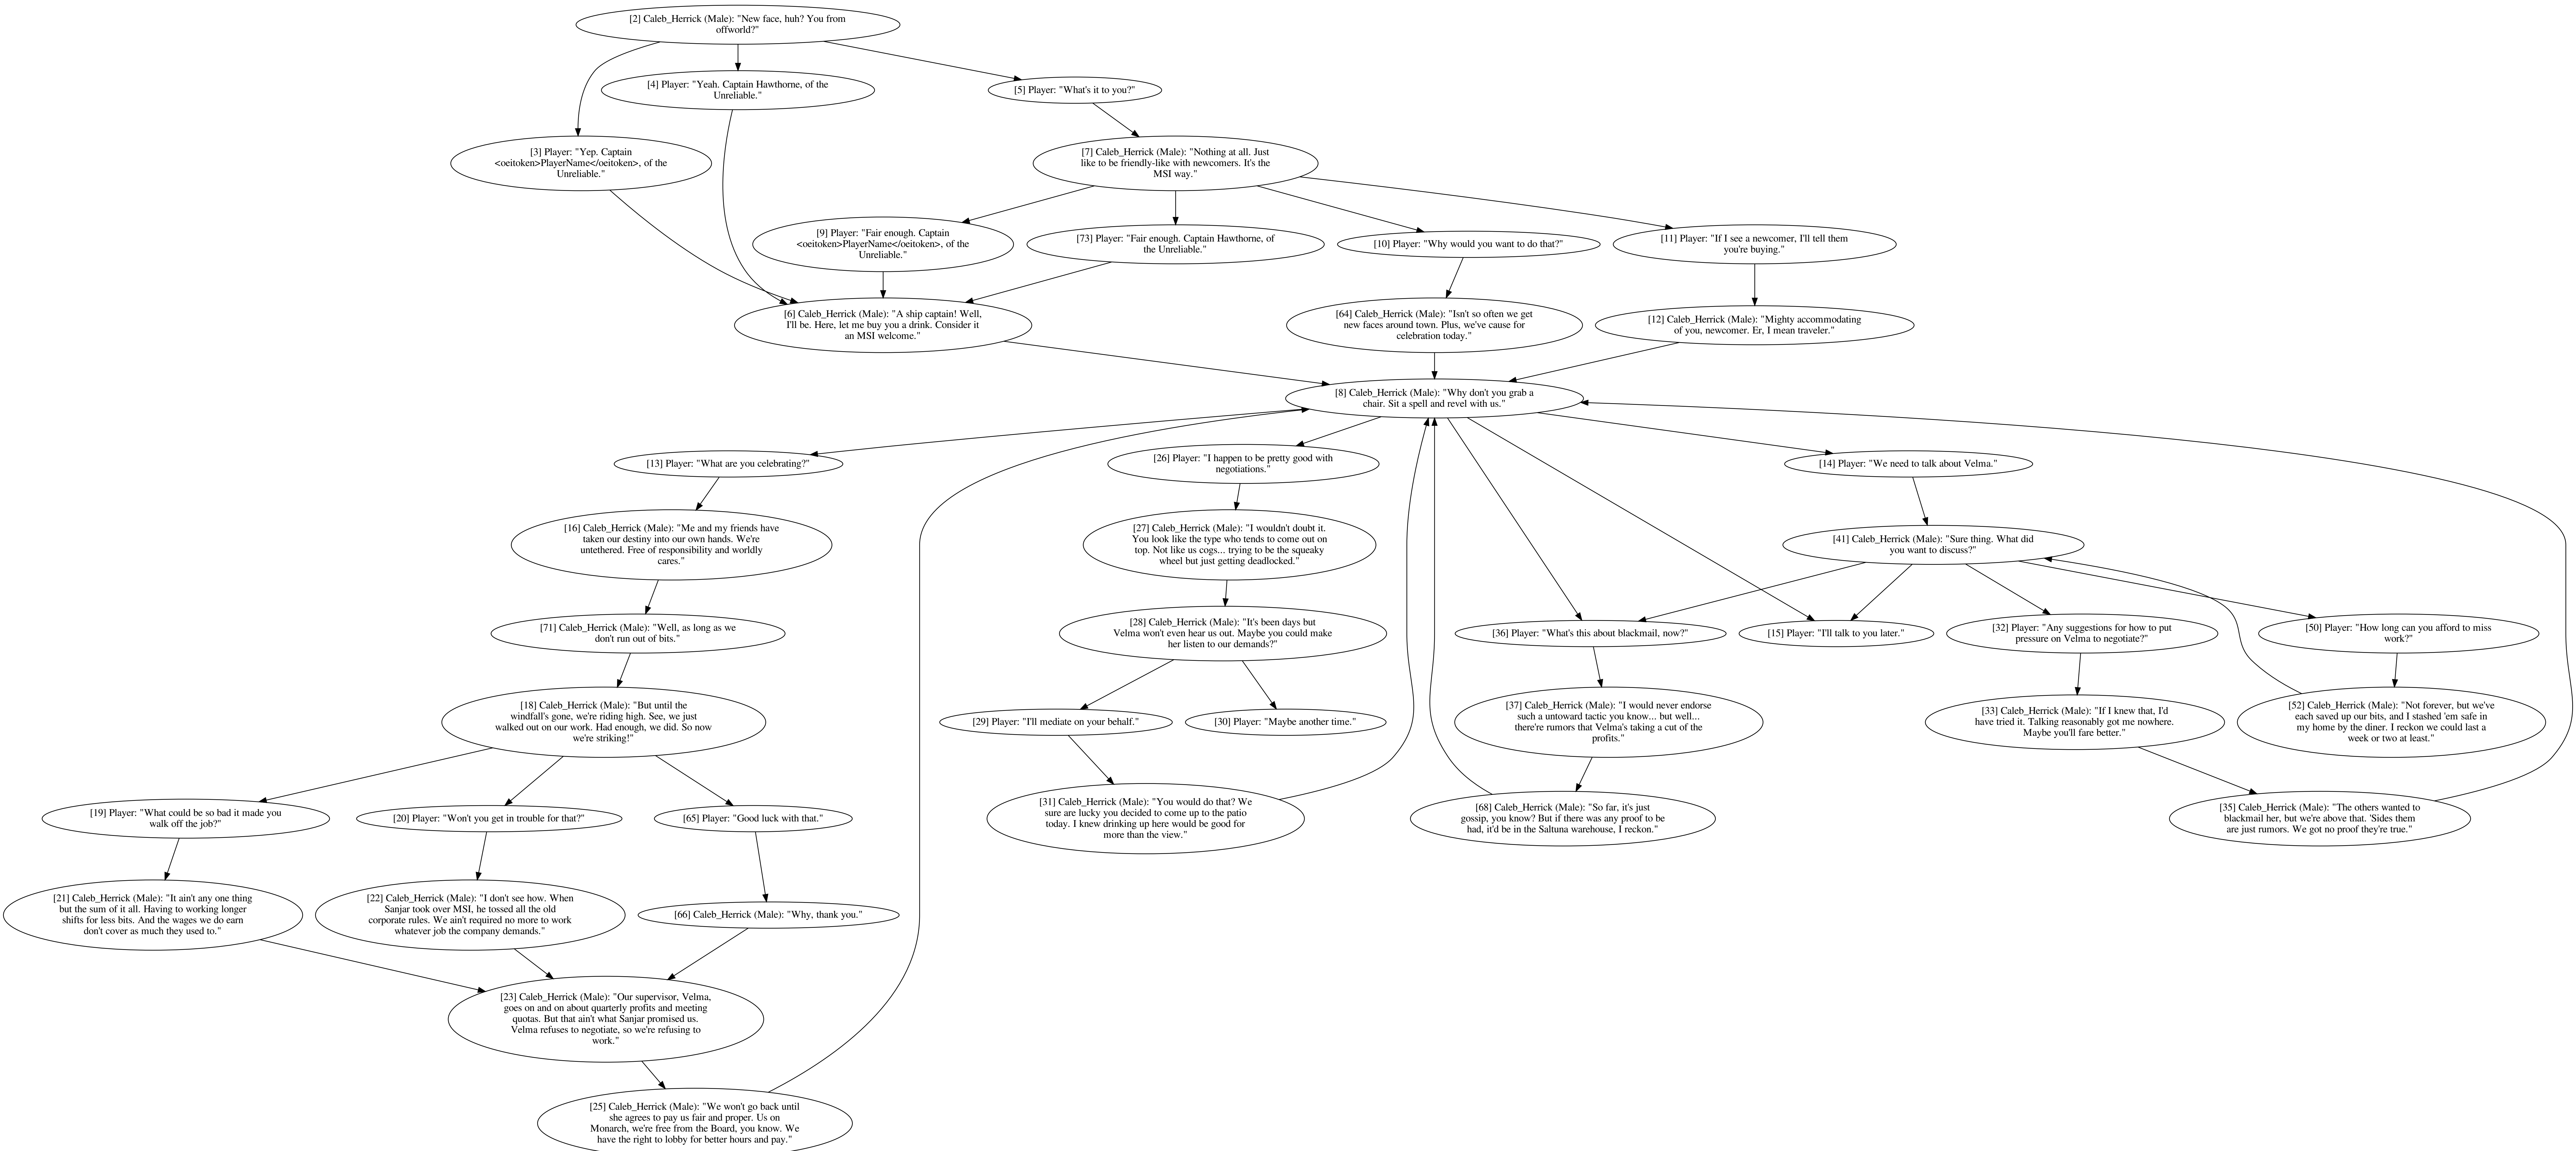

Supplement: software [file 2024.emnlp-main.520.software.zip]

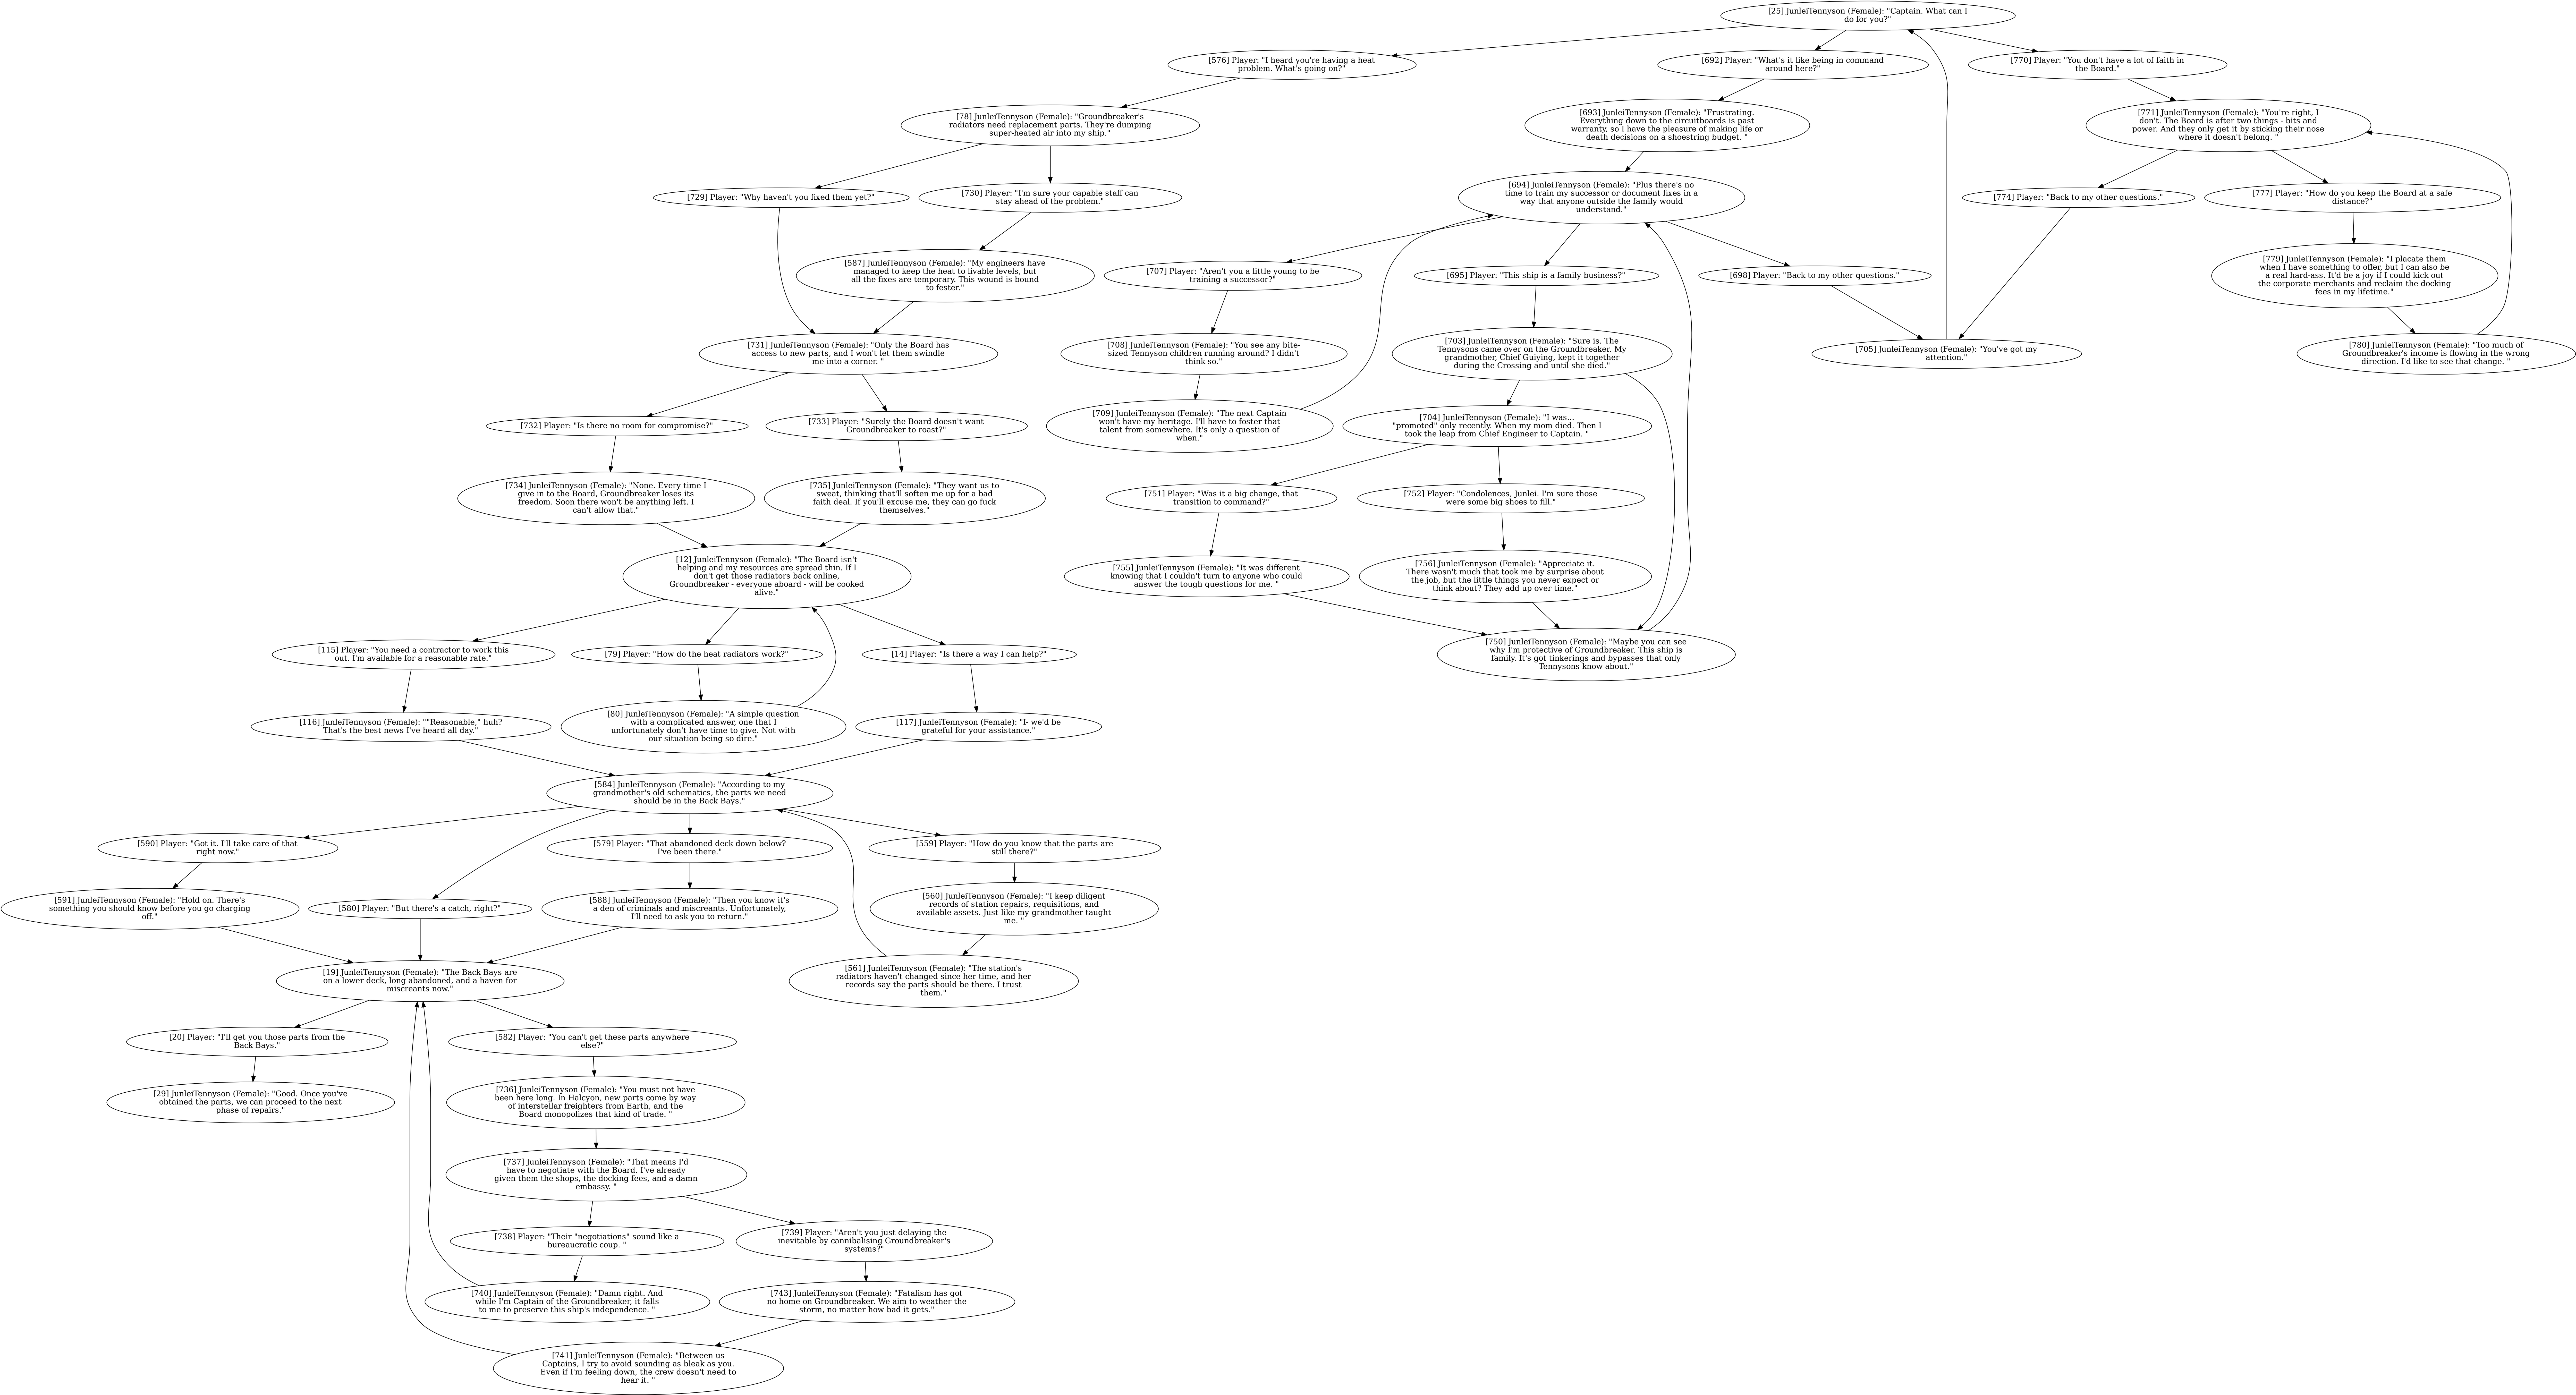

Supplement: software [file 2024.emnlp-main.520.software.zip]

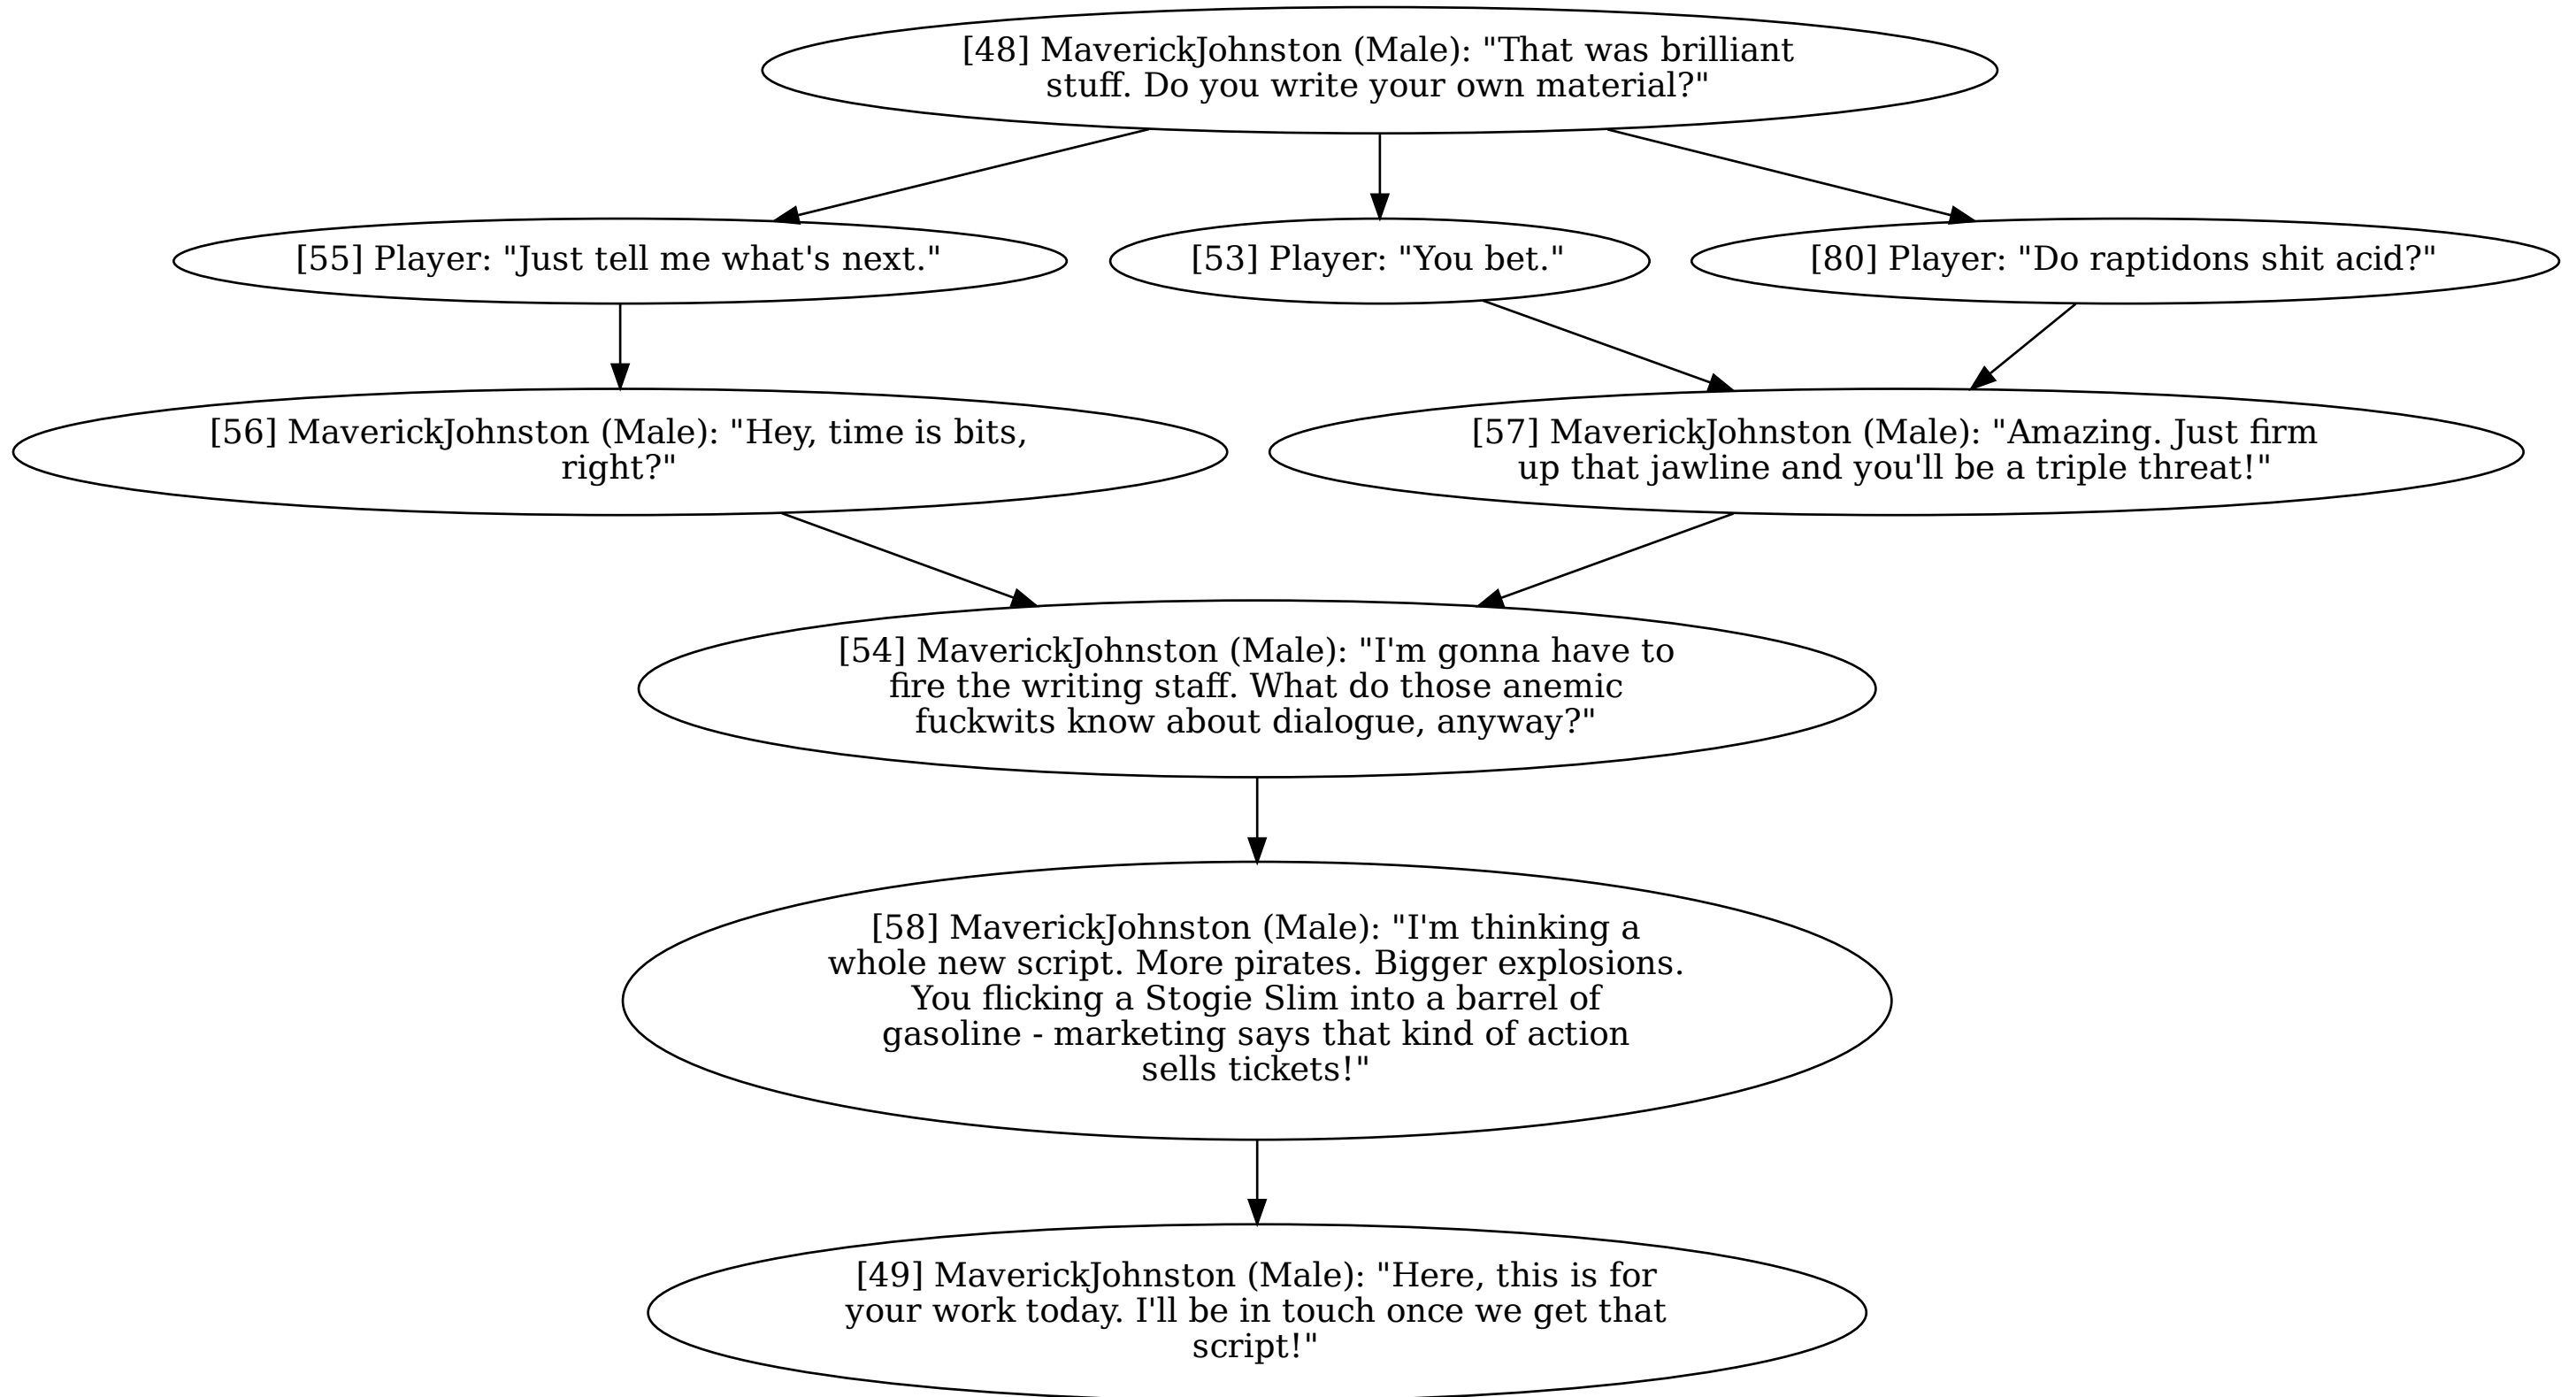

Supplement: software [file 2024.emnlp-main.520.software.zip]

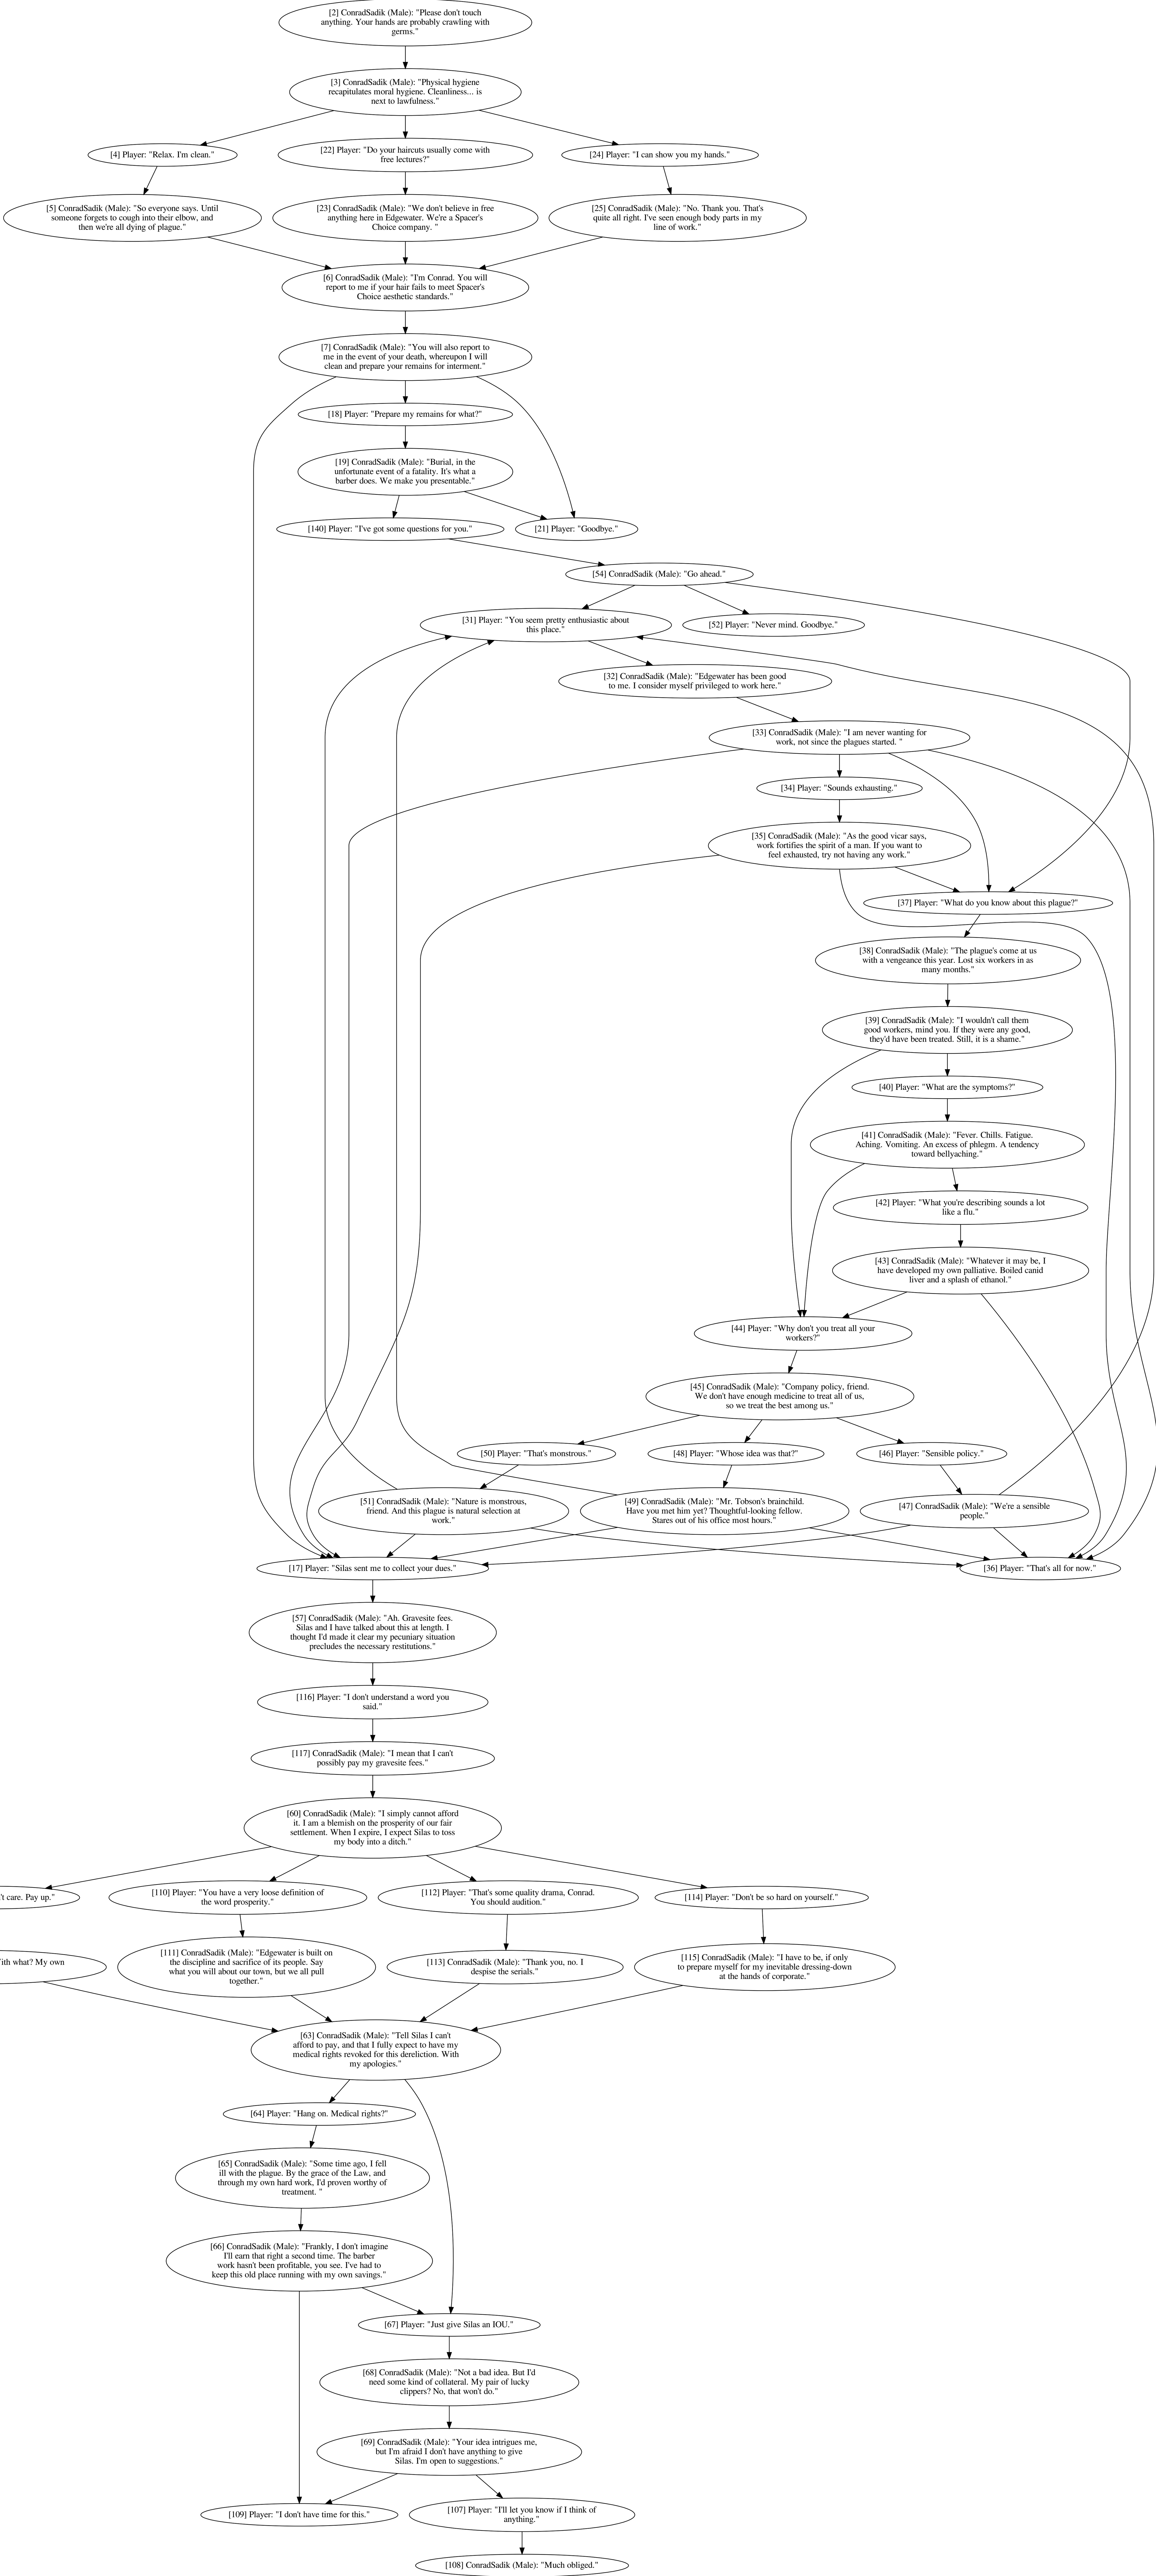

Supplement: software [file 2024.emnlp-main.520.software.zip]

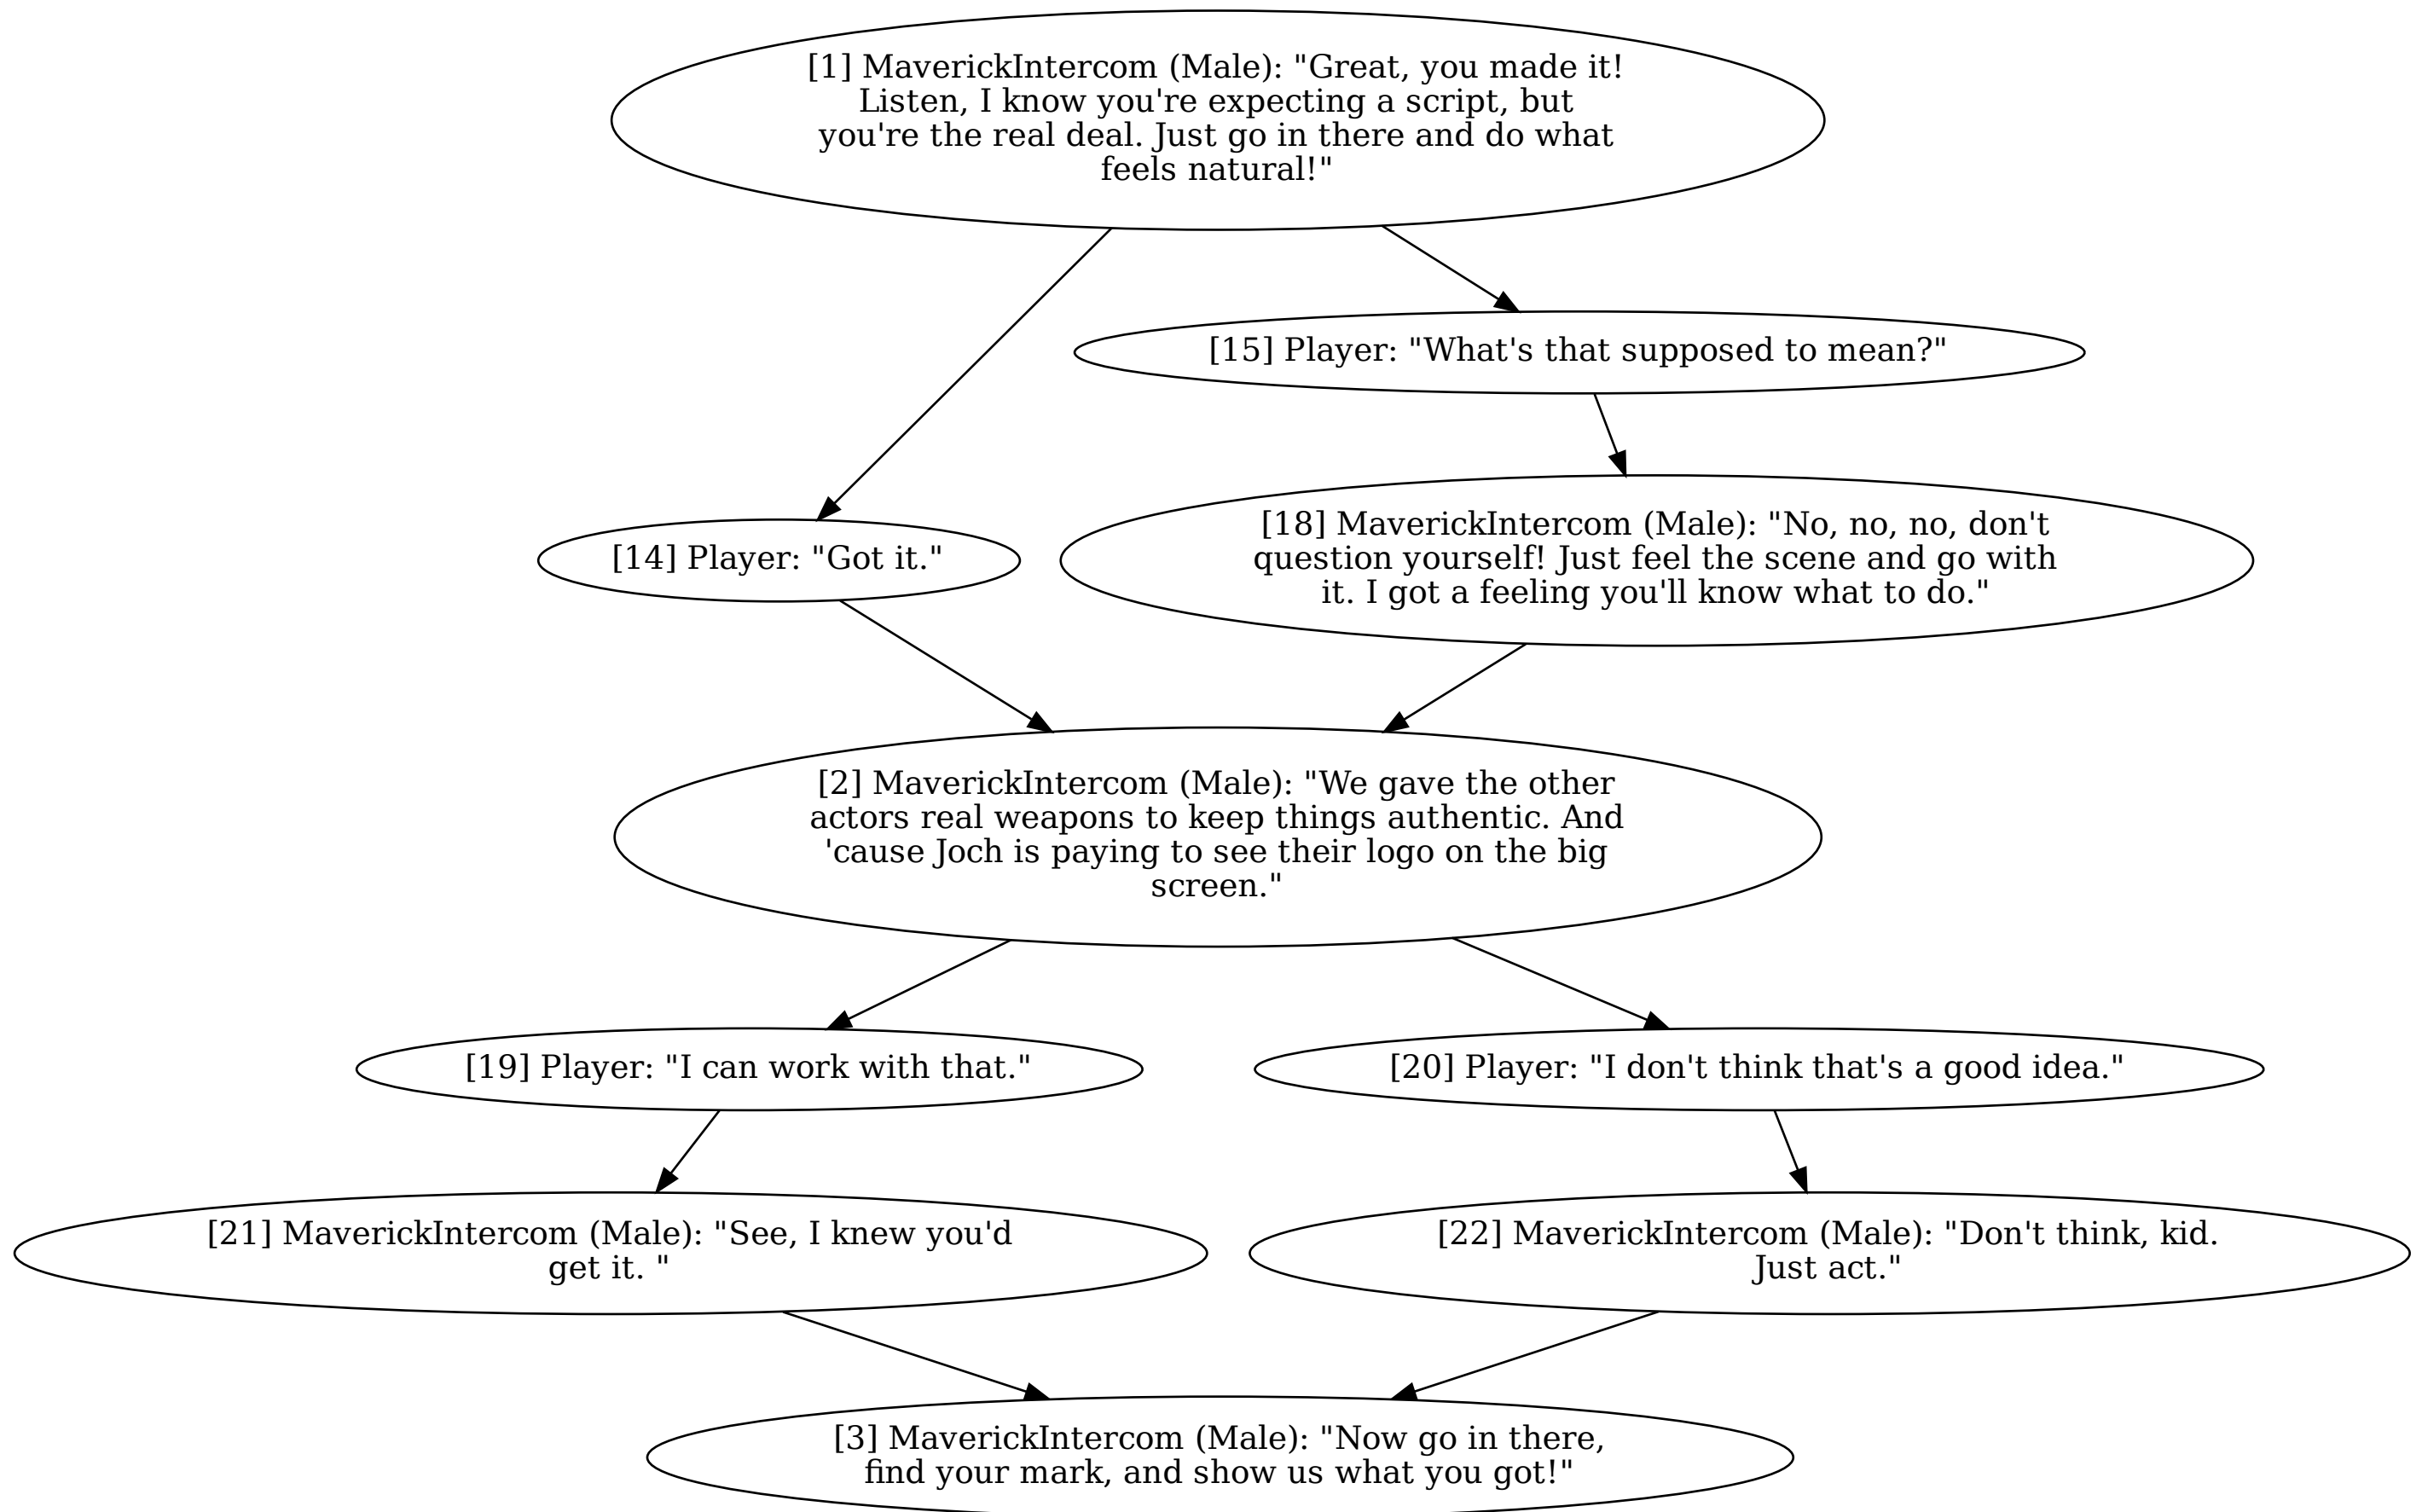

Supplement: software [file 2024.emnlp-main.520.software.zip]

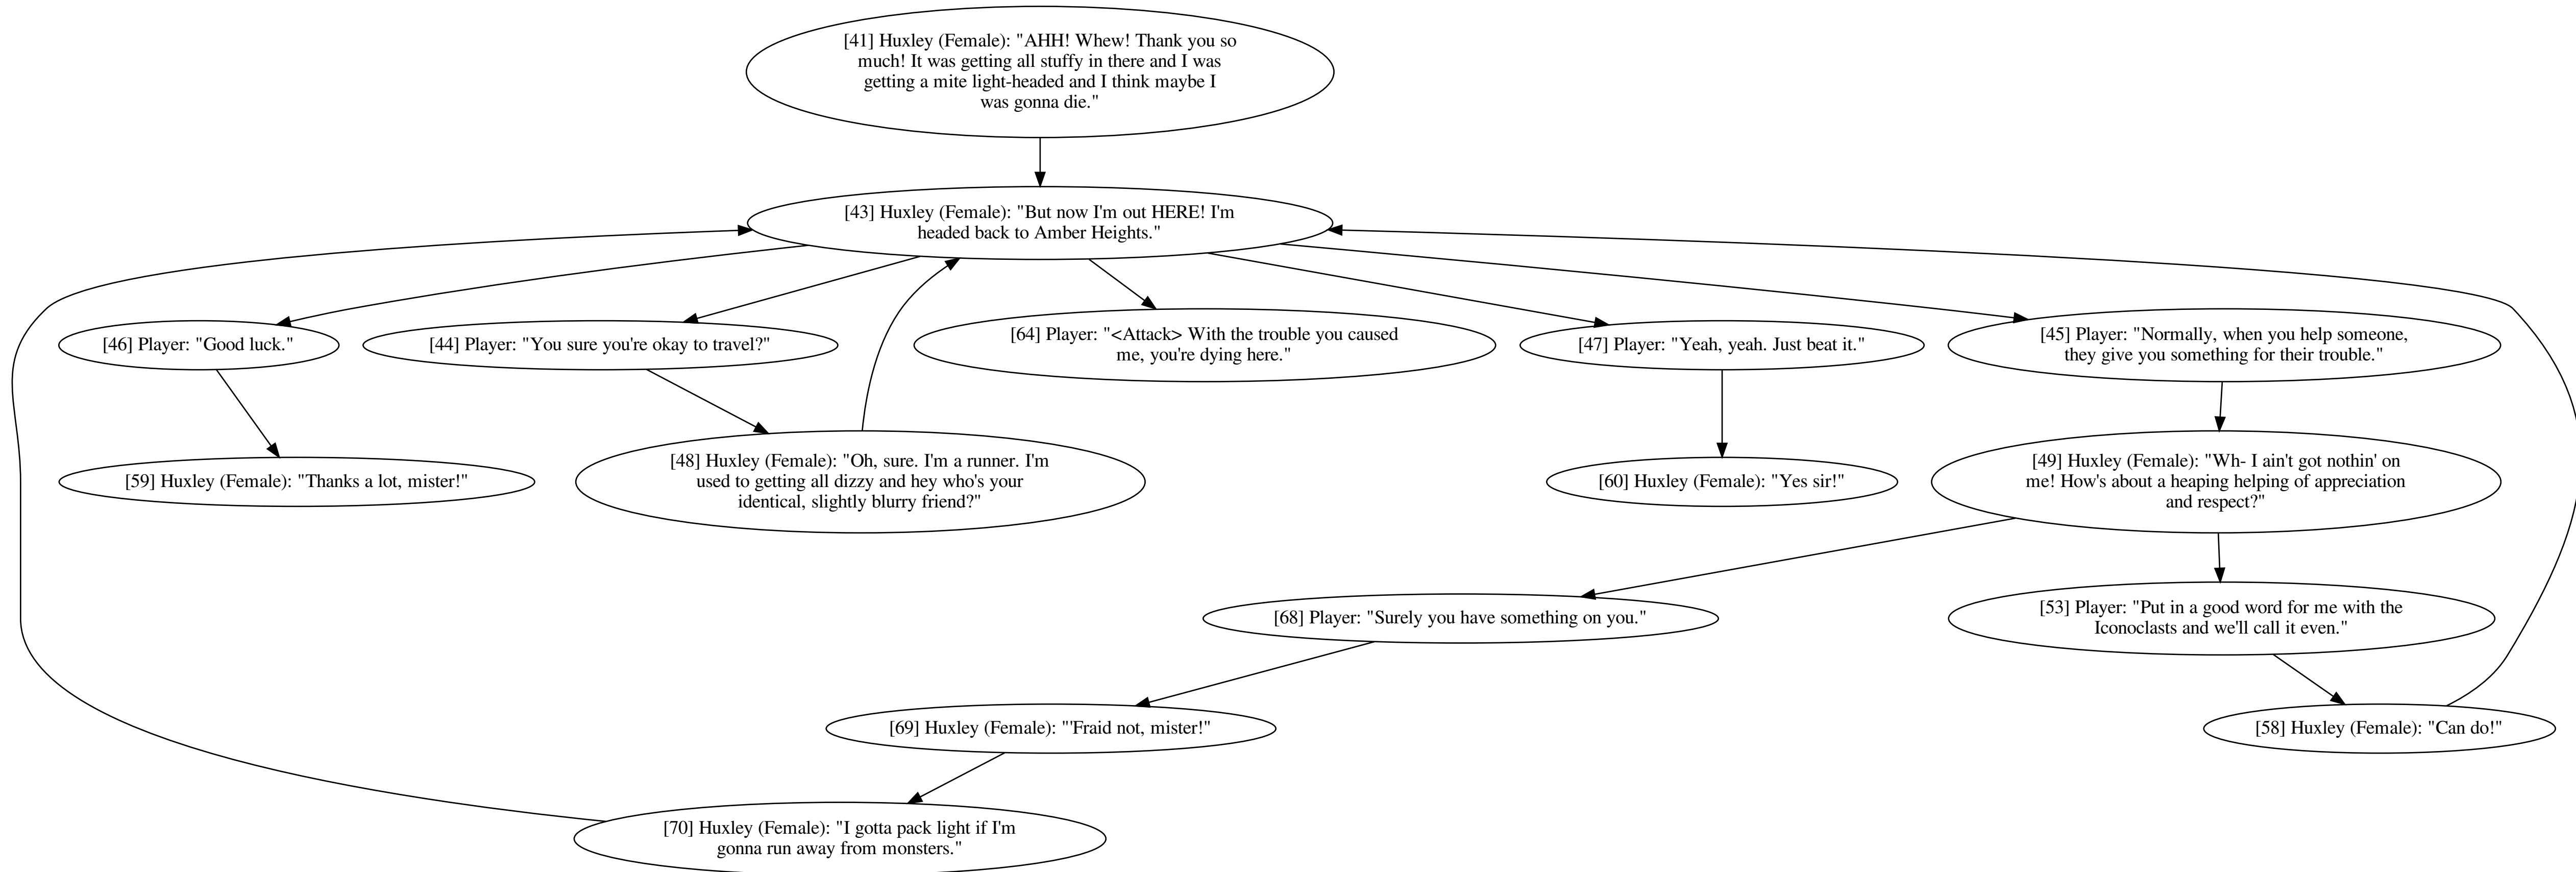

Supplement: software [file 2024.emnlp-main.520.software.zip]

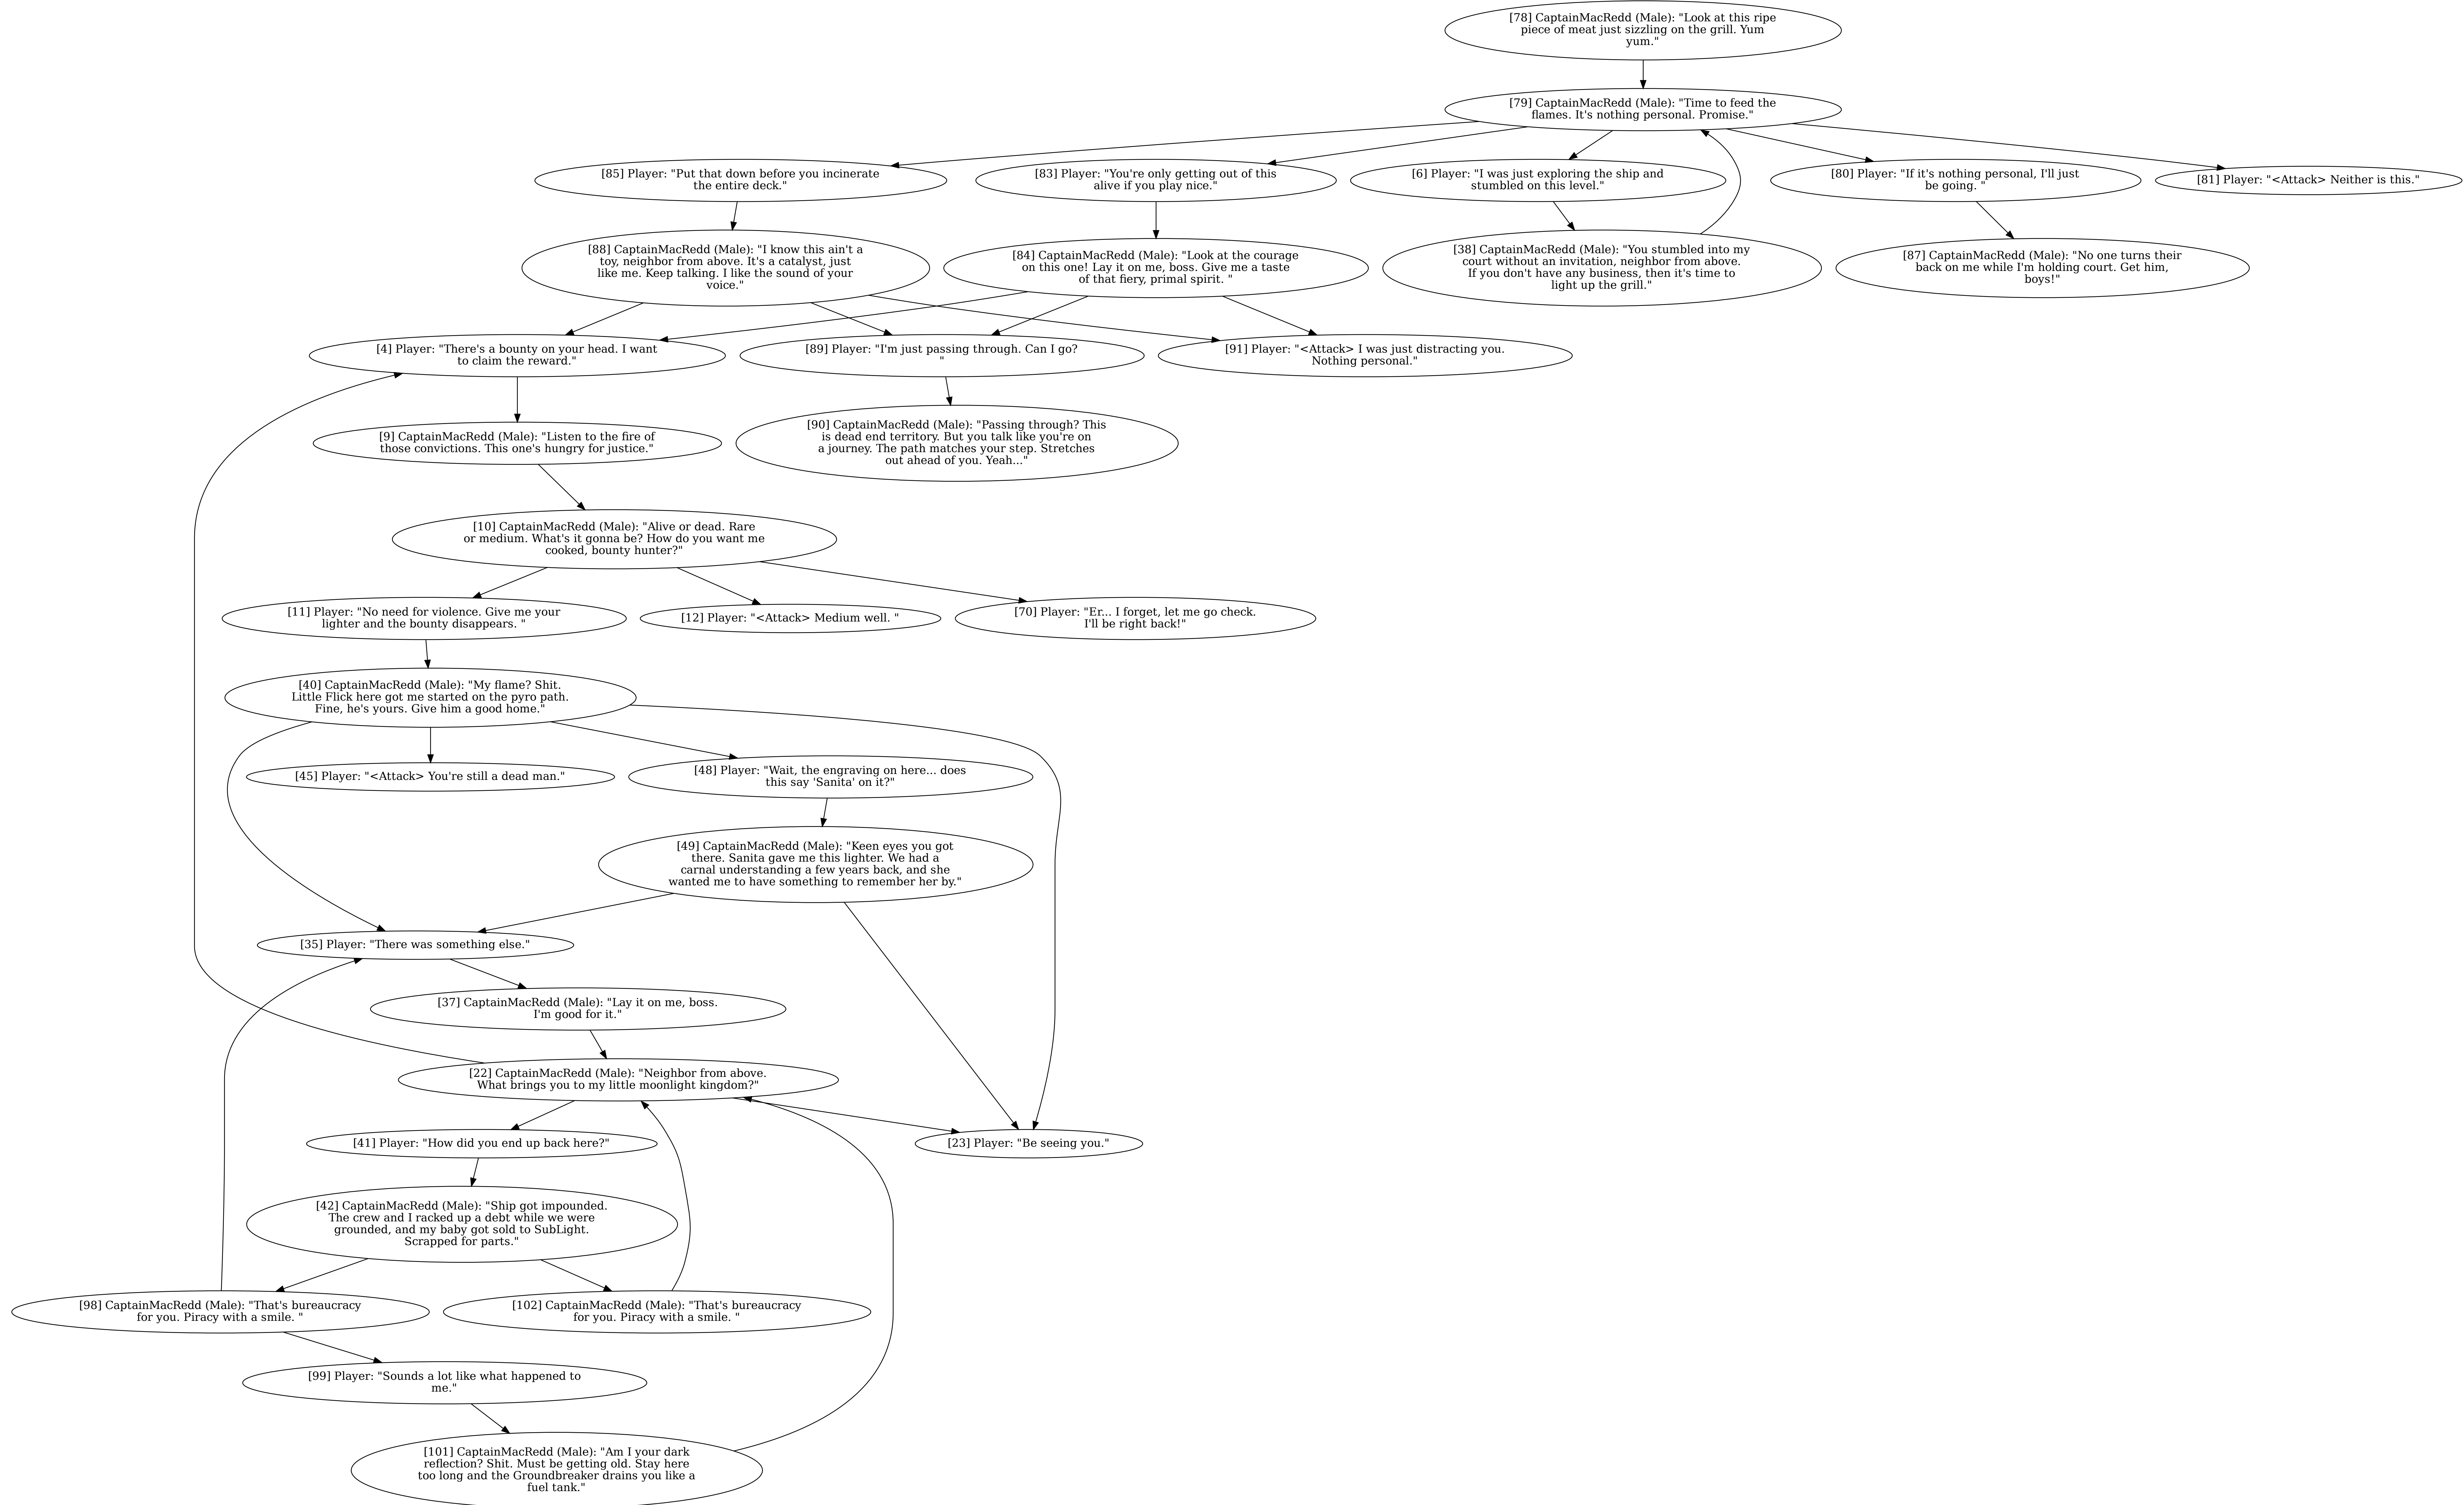

Supplement: software [file 2024.emnlp-main.520.software.zip]

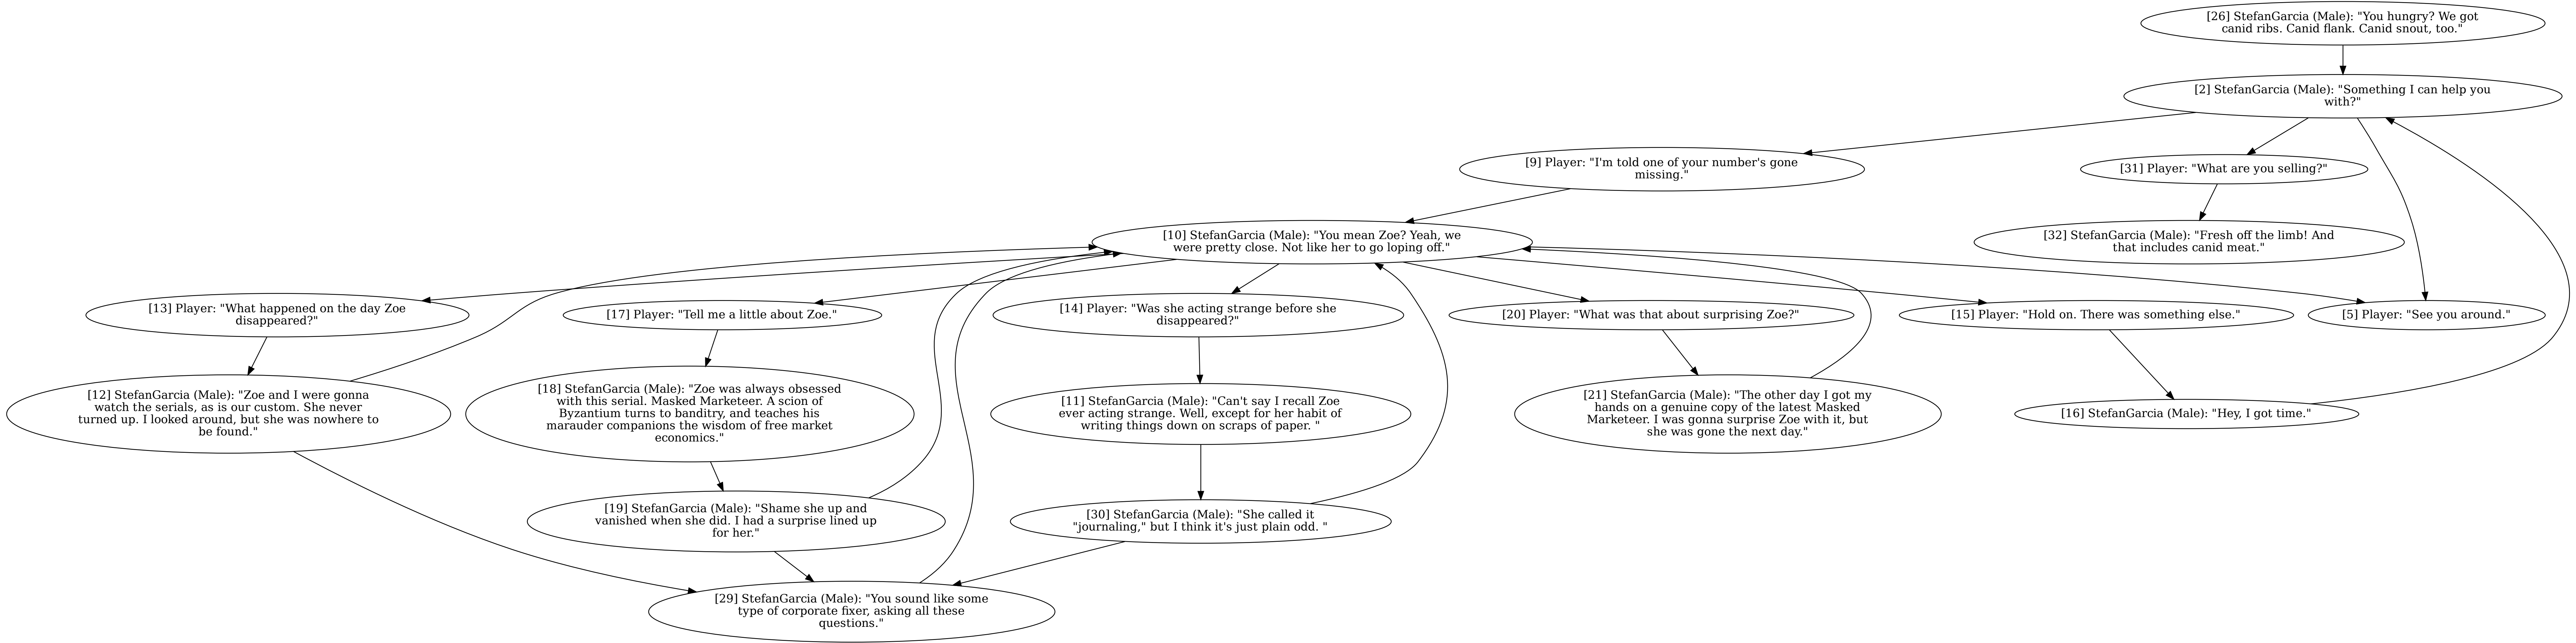

Supplement: software [file 2024.emnlp-main.520.software.zip]

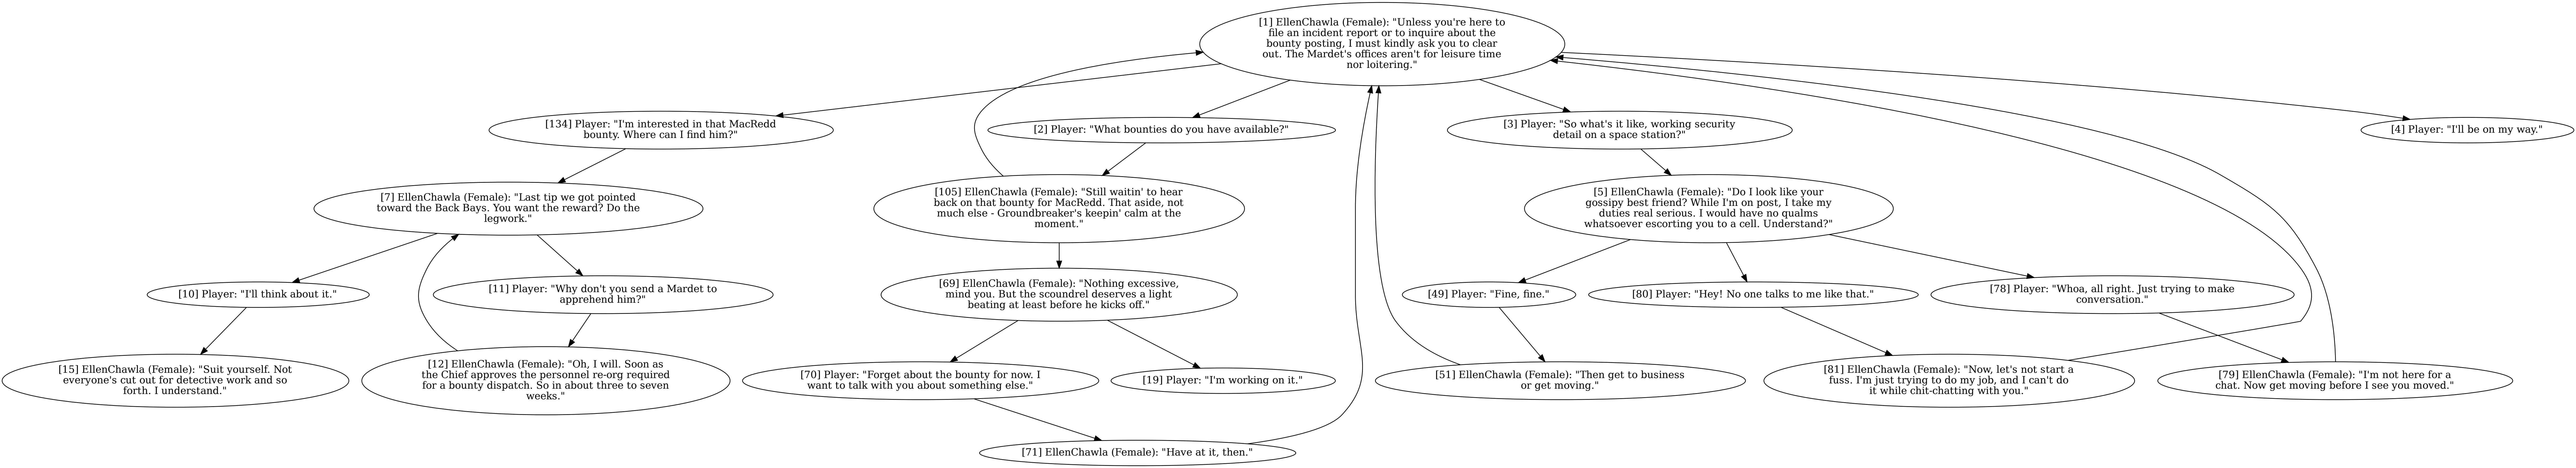

Supplement: software [file 2024.emnlp-main.520.software.zip]

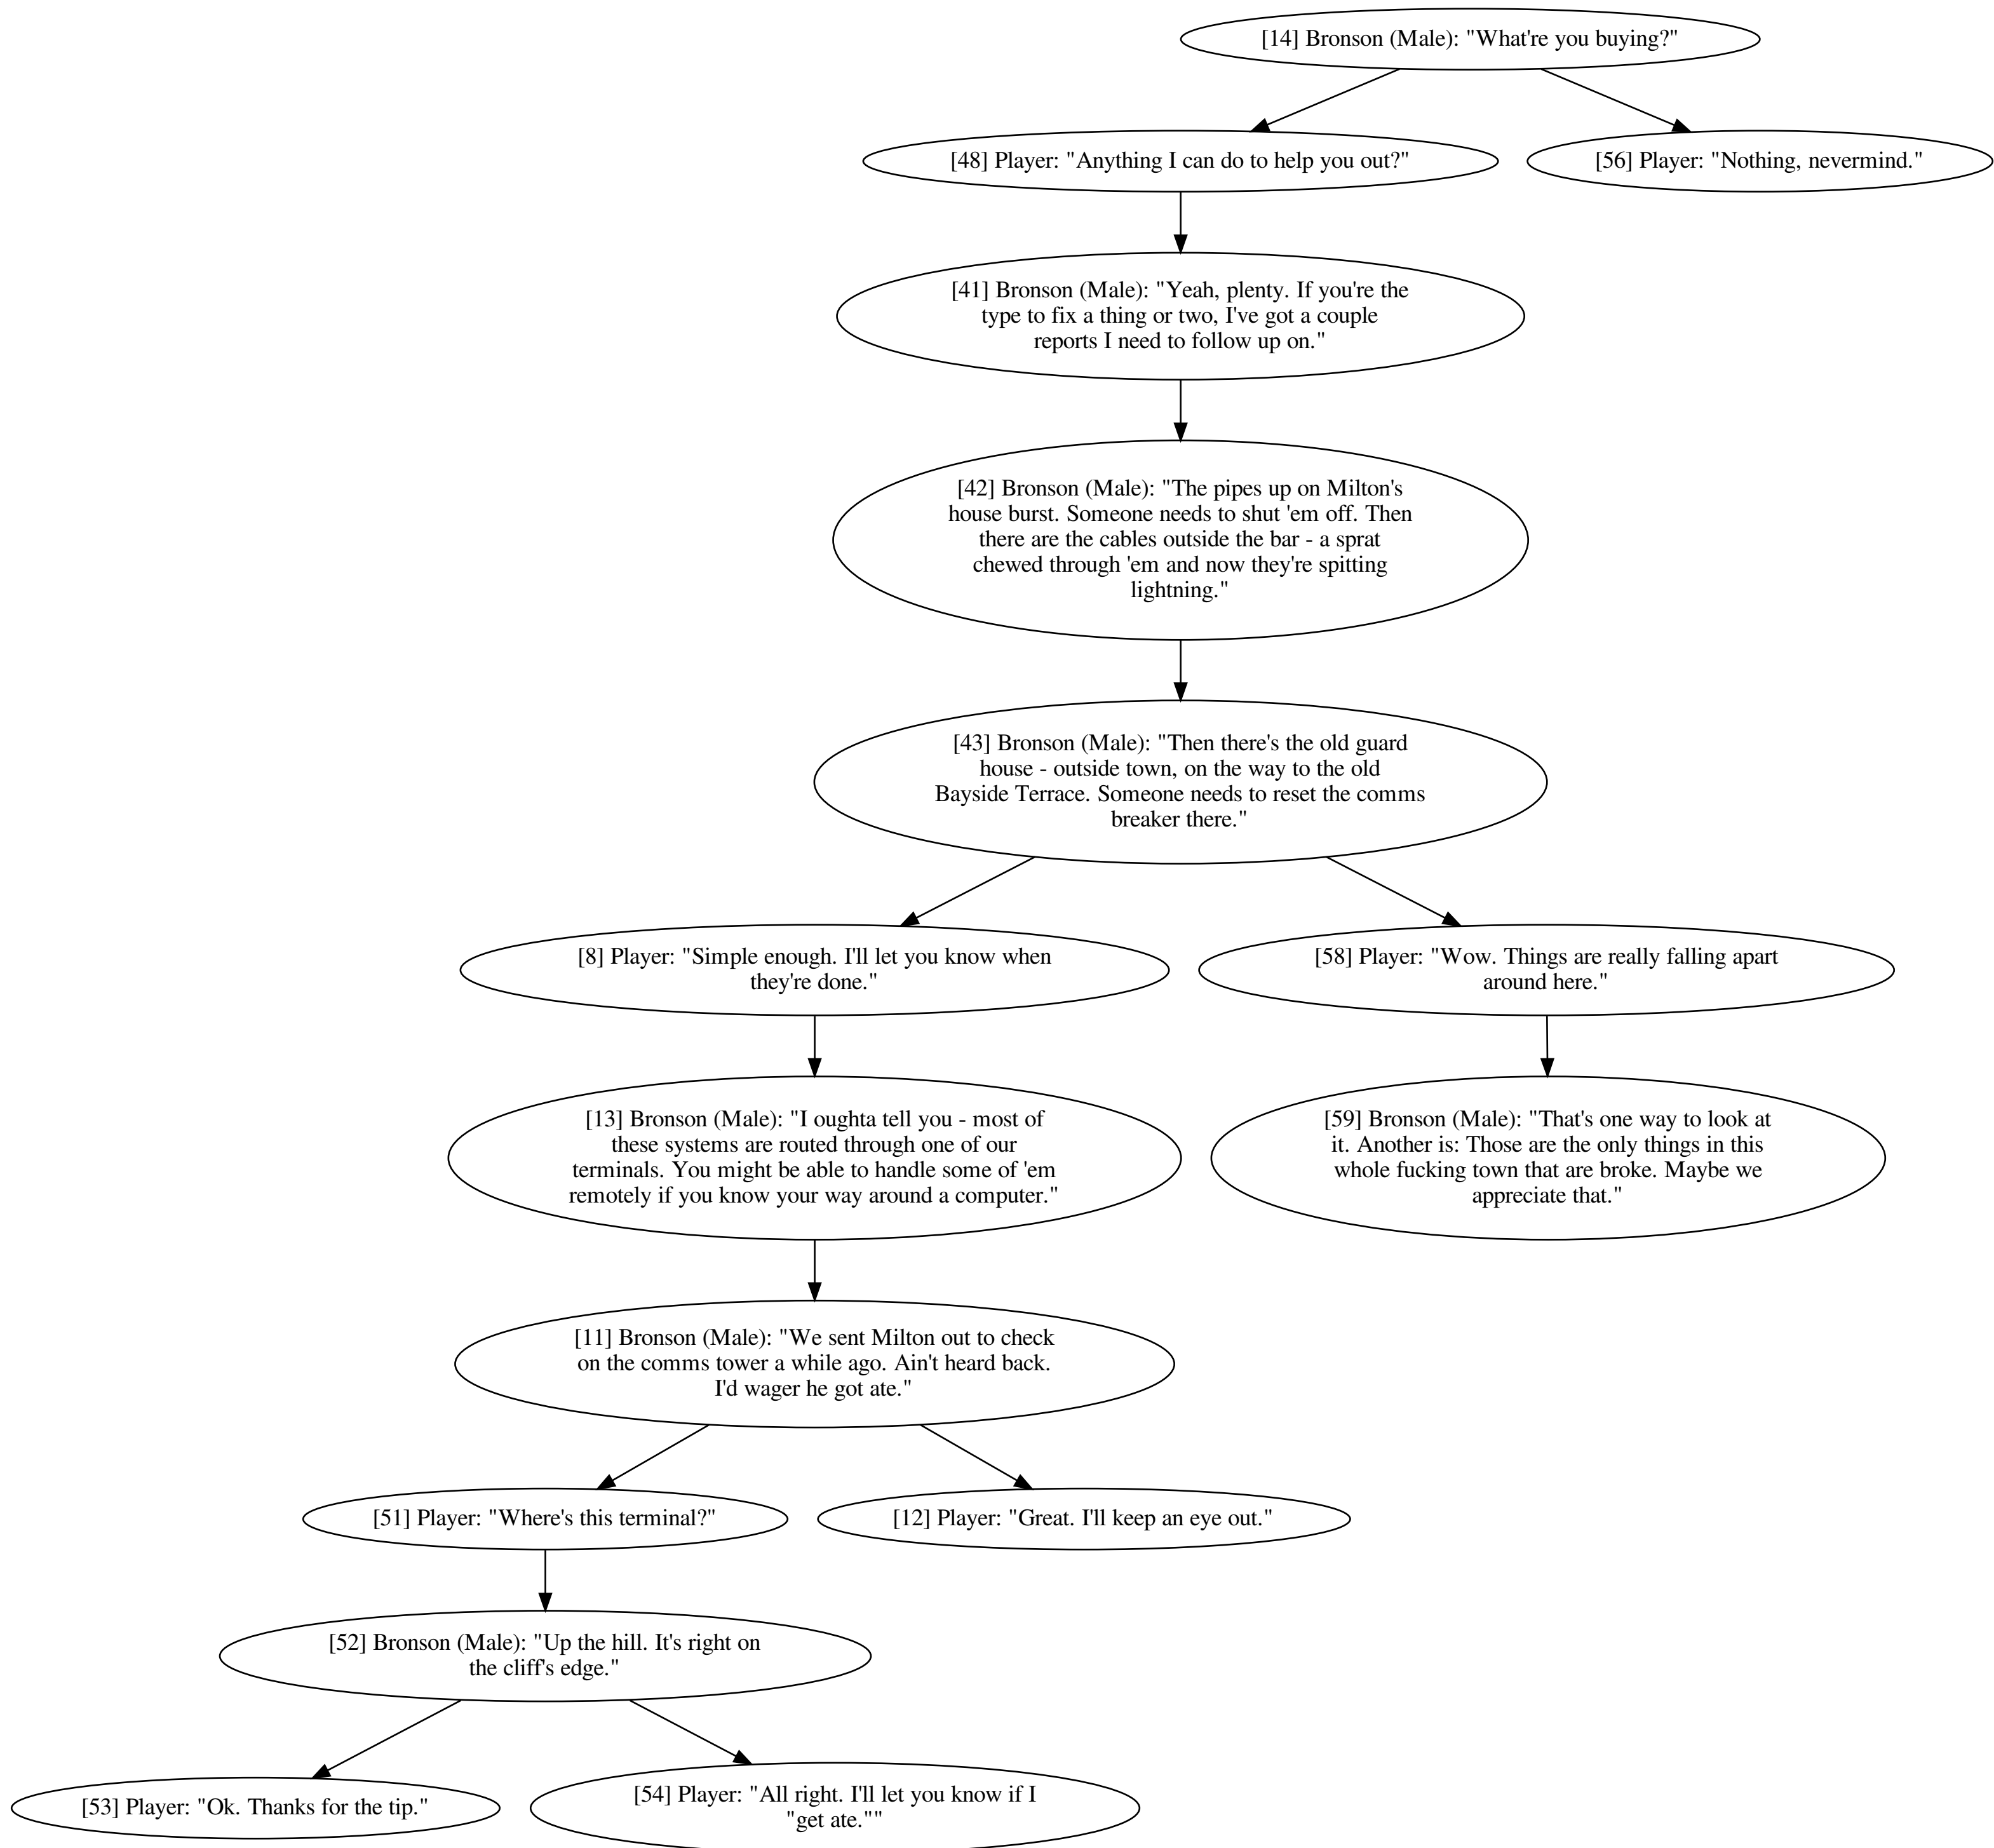

Supplement: software [file 2024.emnlp-main.520.software.zip]

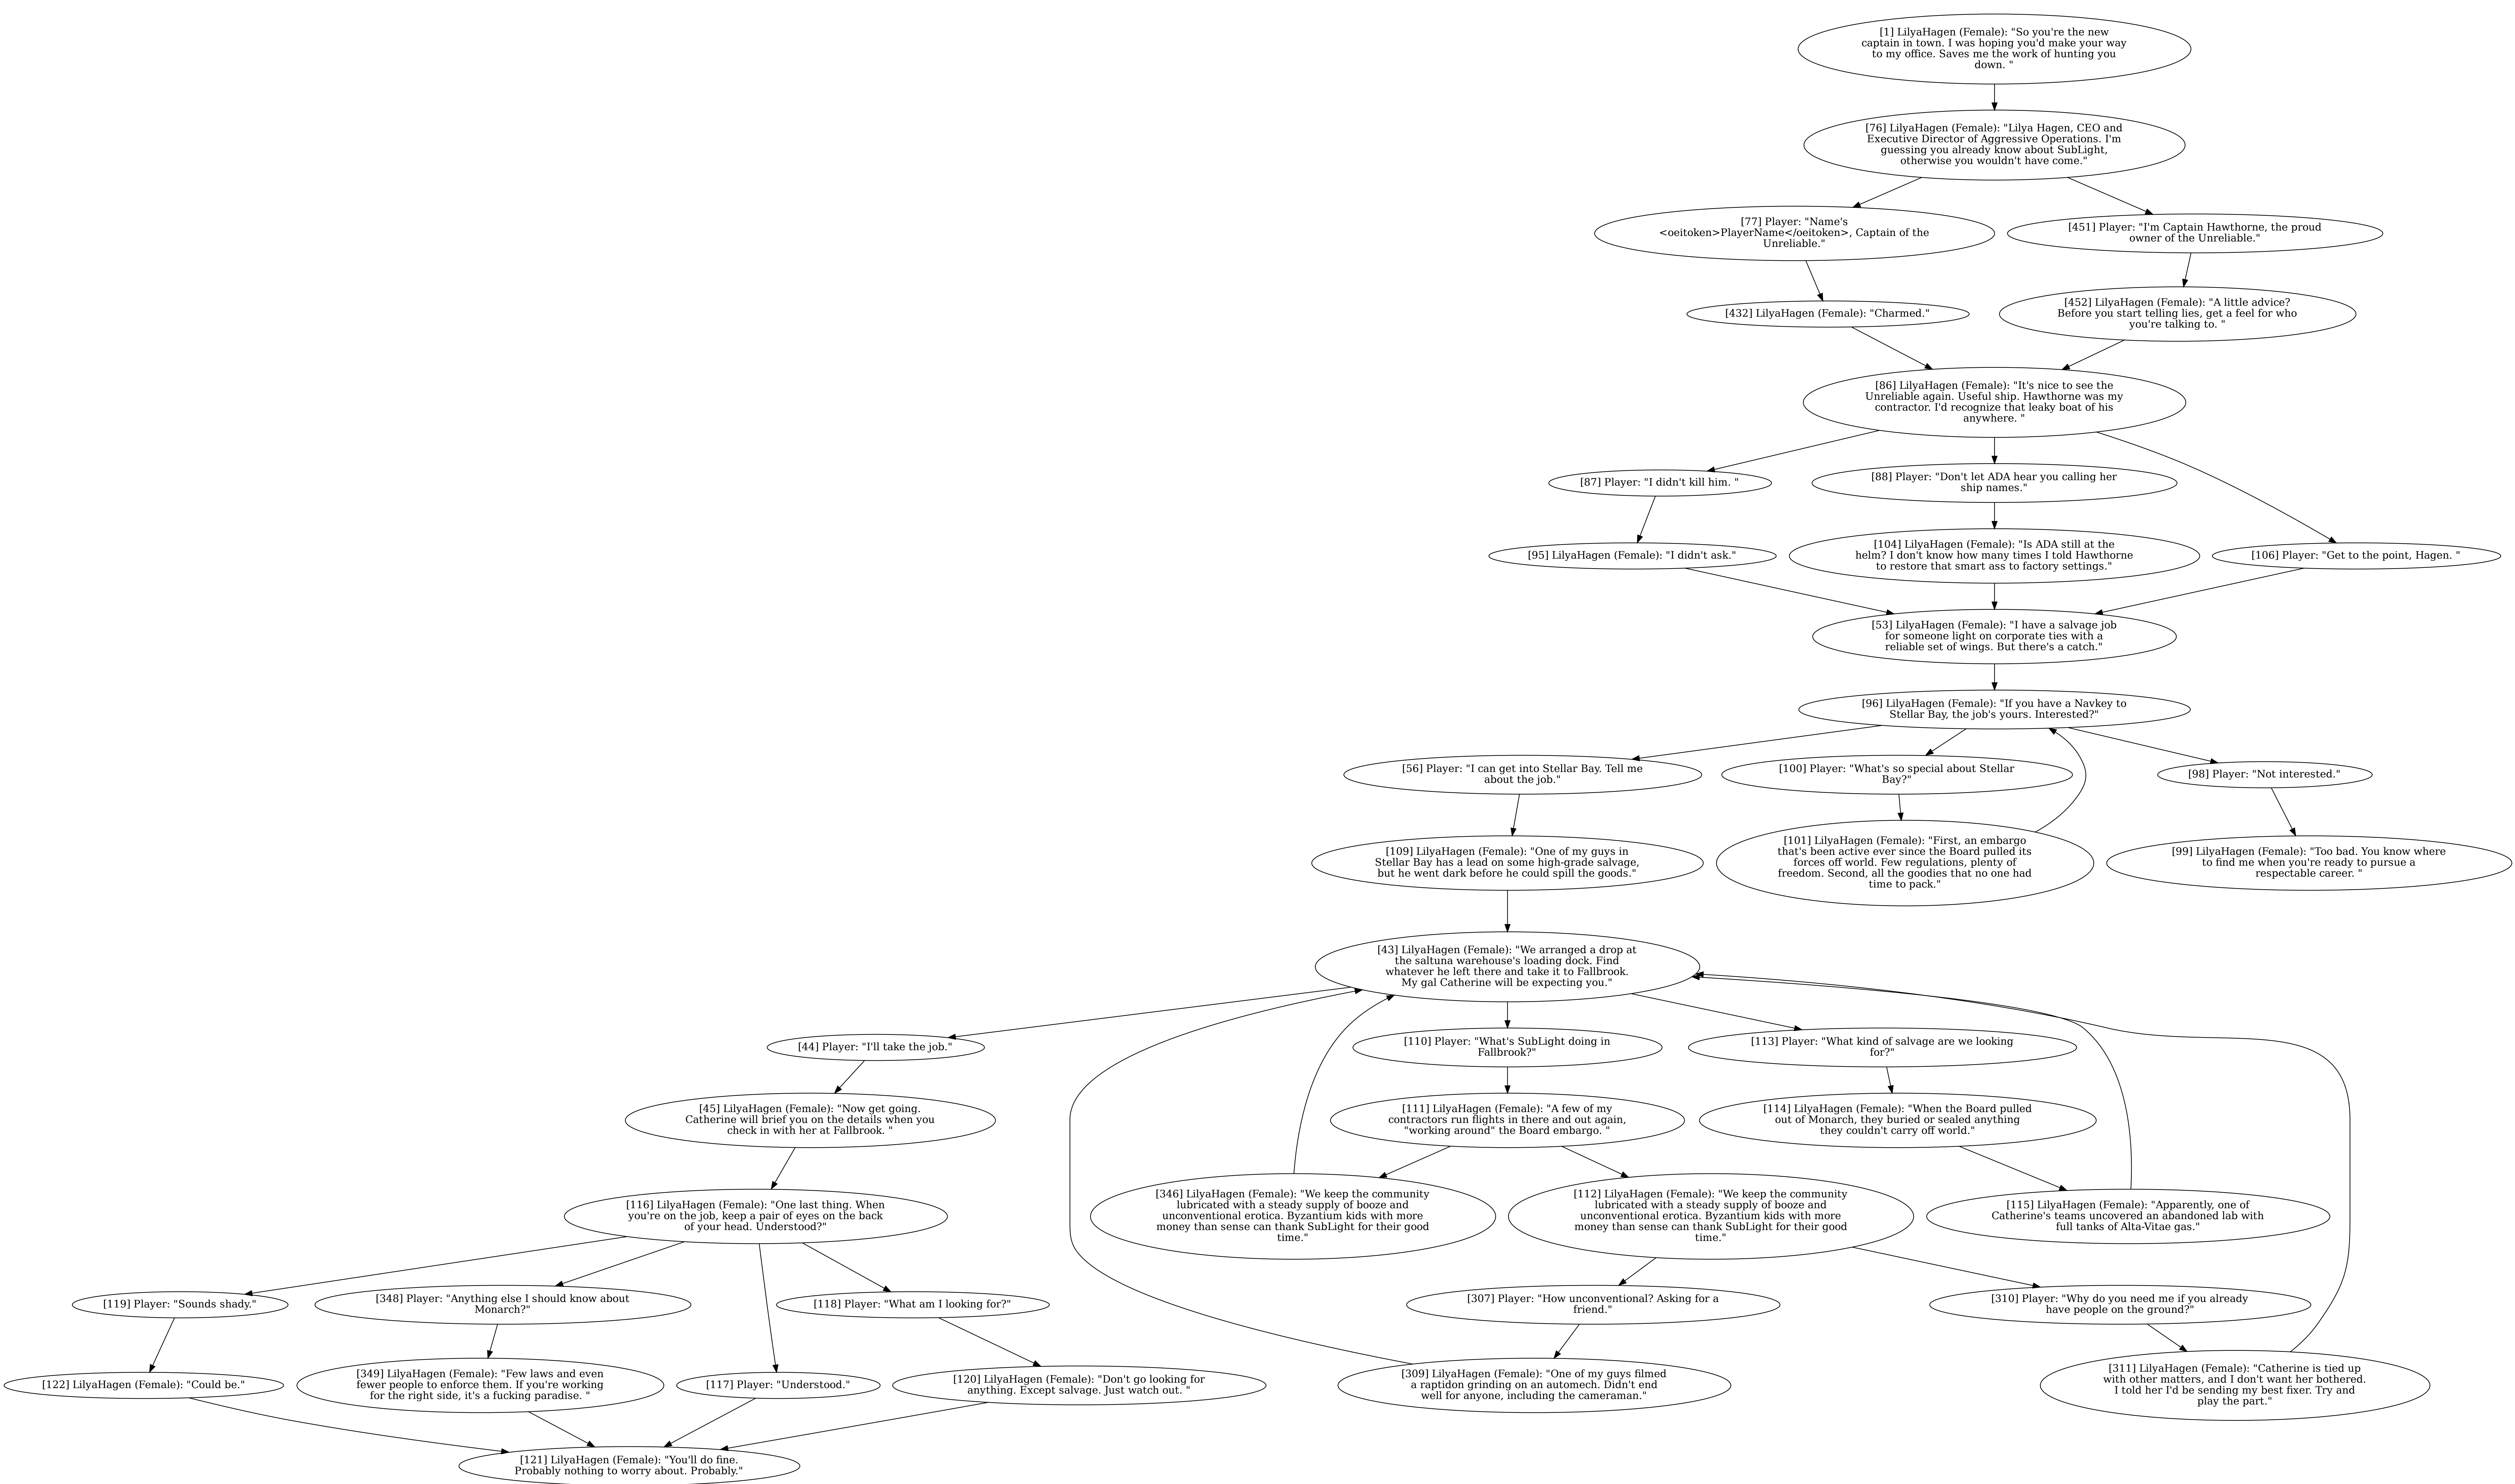

Supplement: software [file 2024.emnlp-main.520.software.zip]

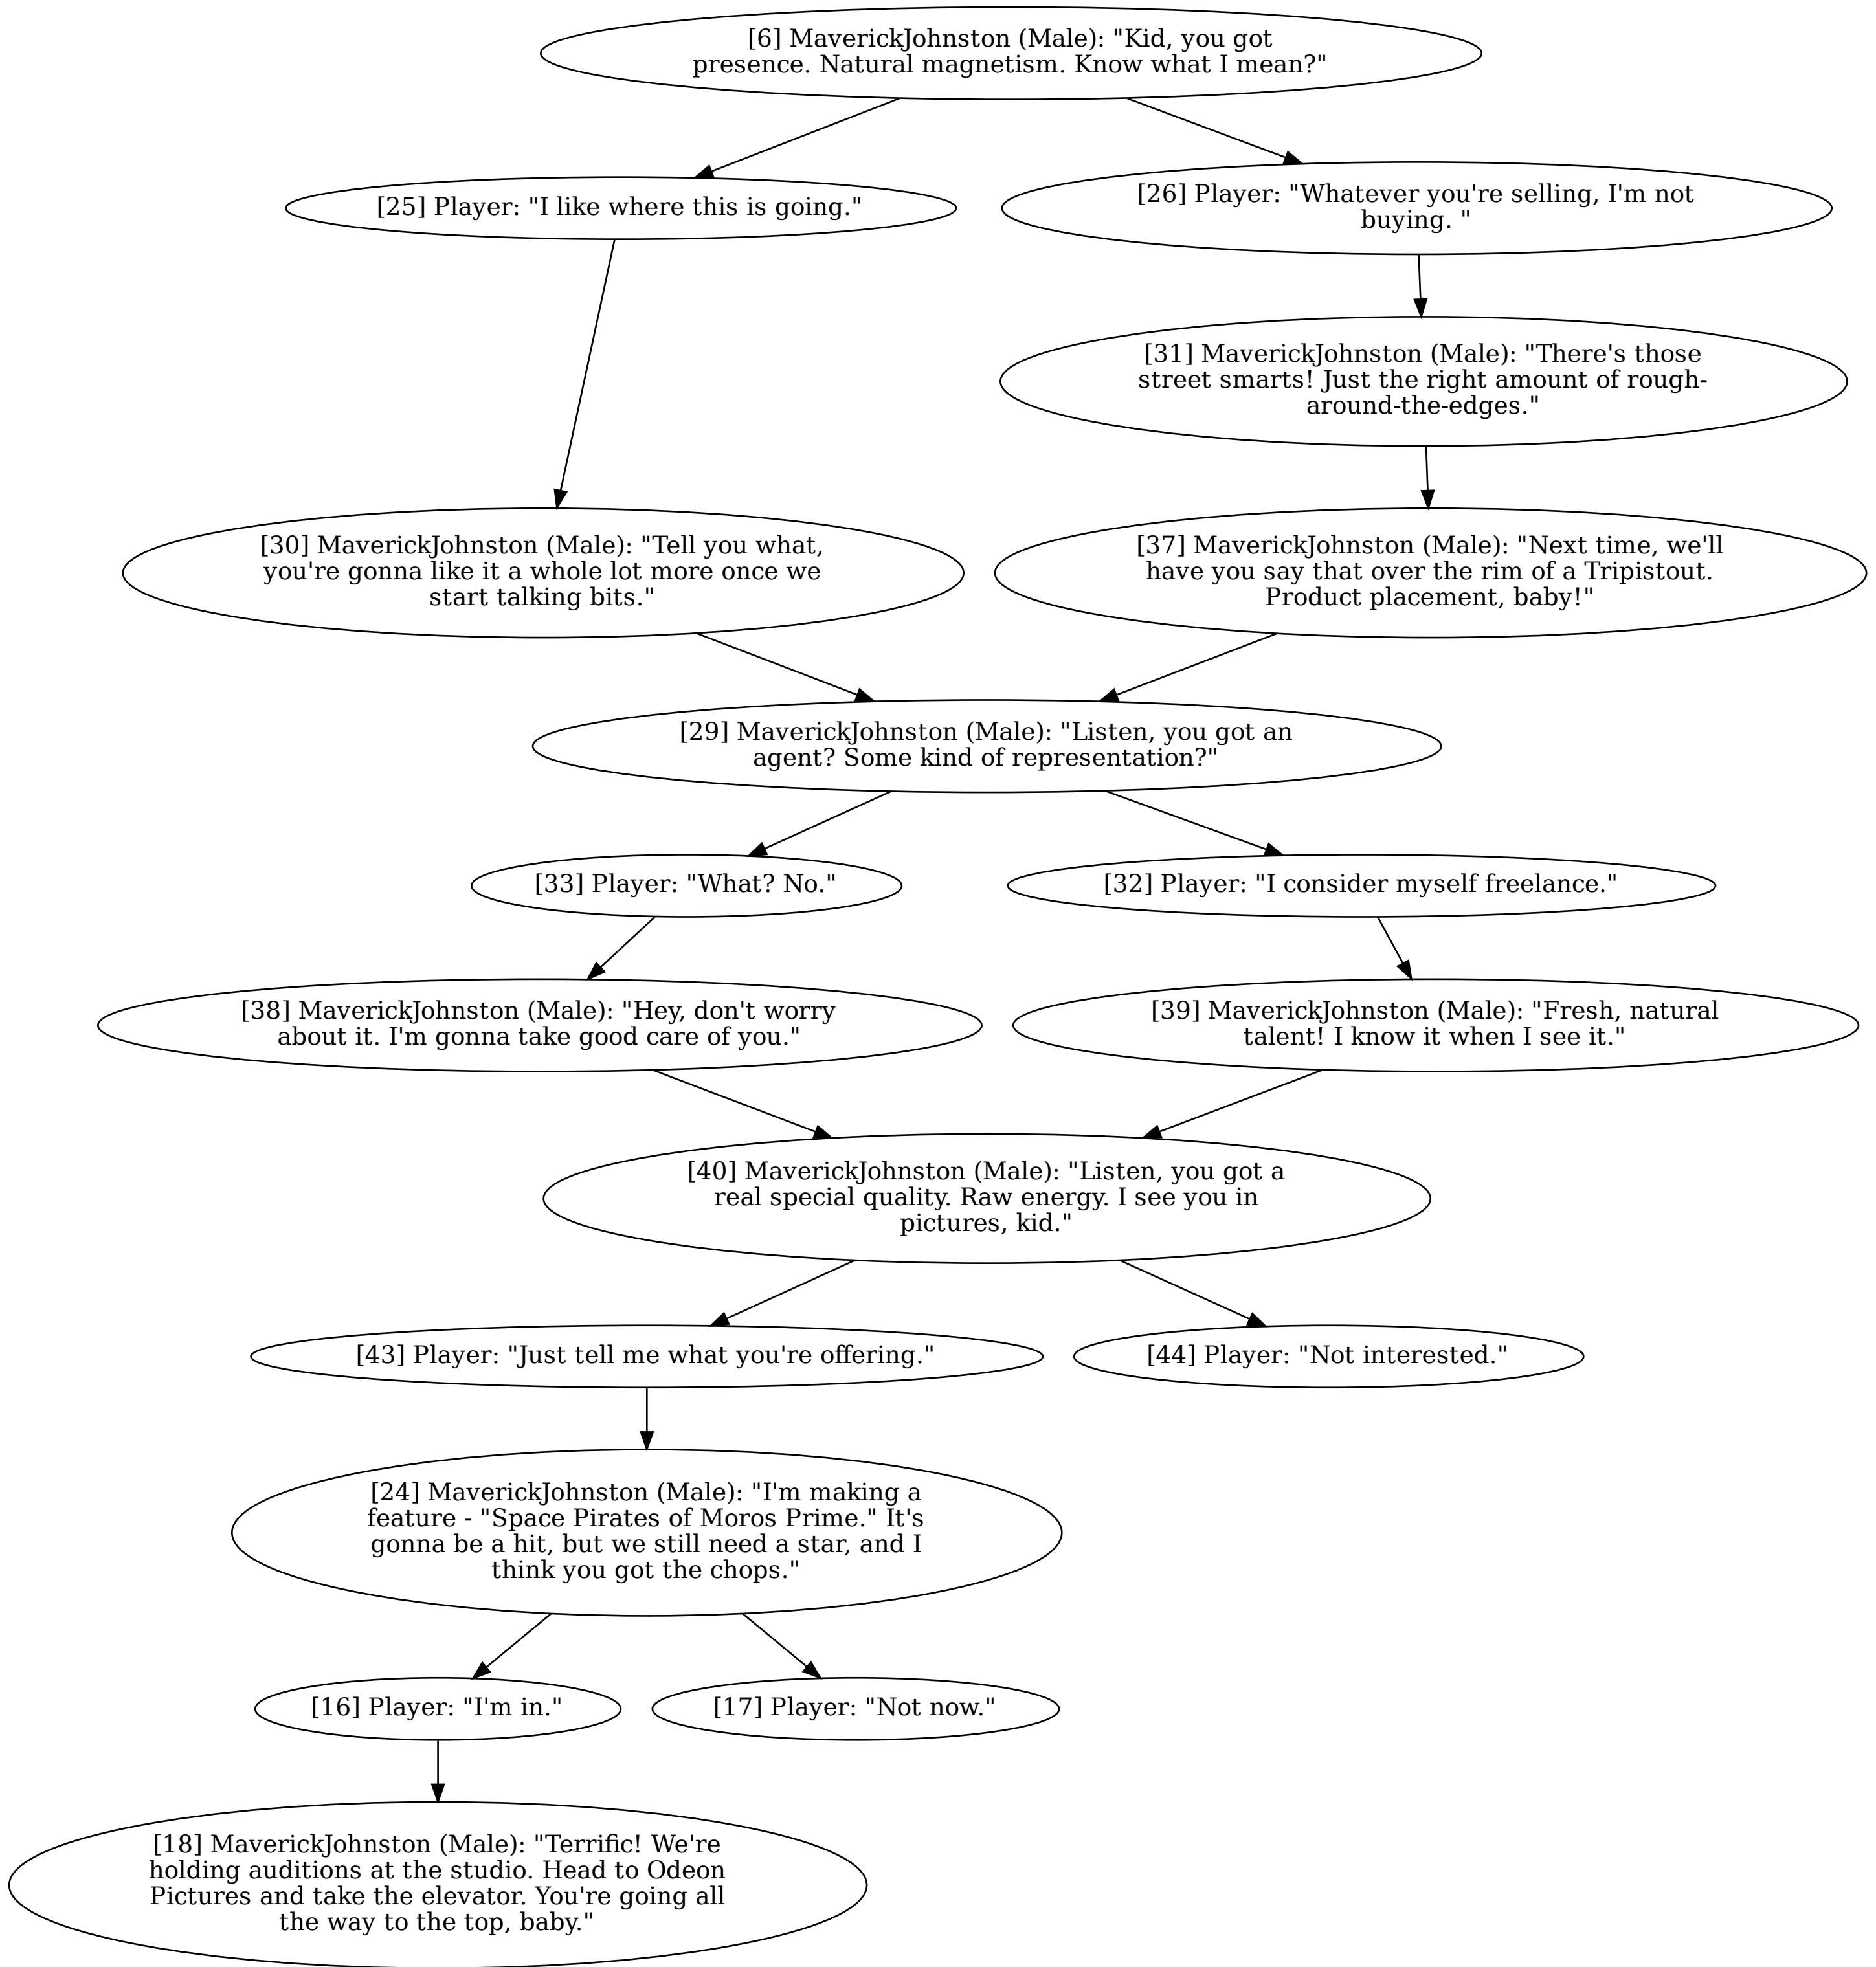

Supplement: software [file 2024.emnlp-main.520.software.zip]

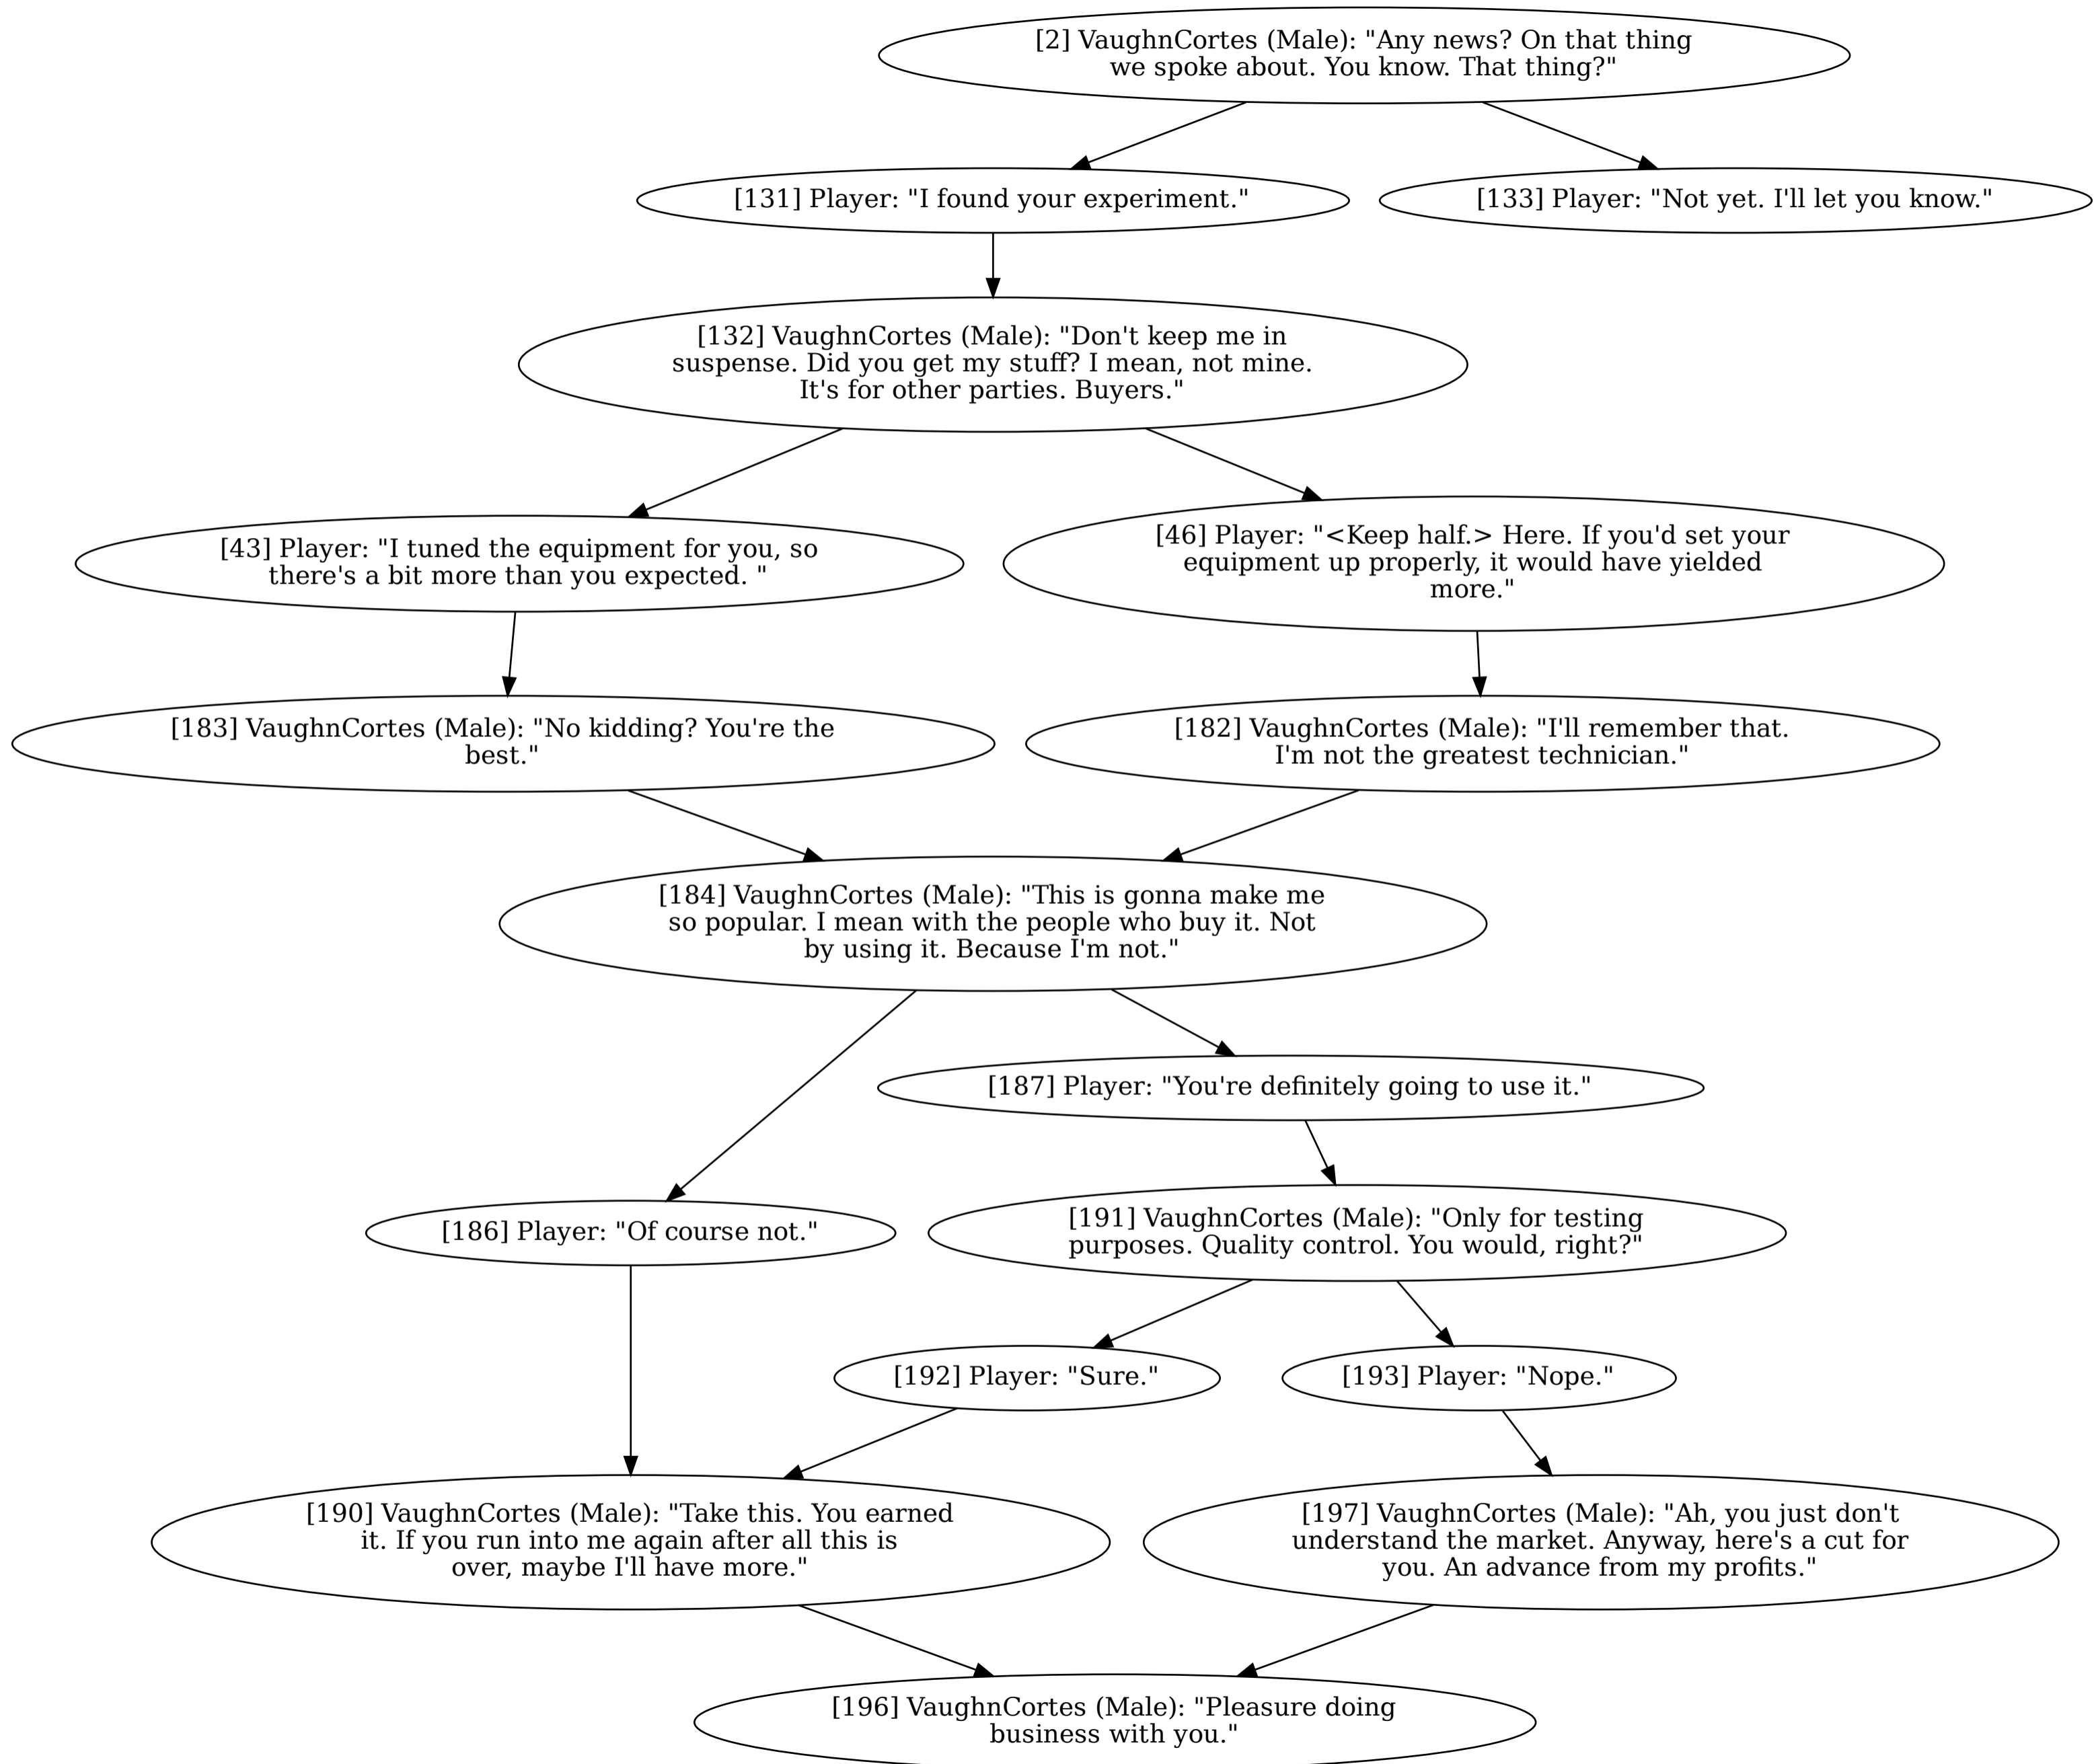

Supplement: software [file 2024.emnlp-main.520.software.zip]

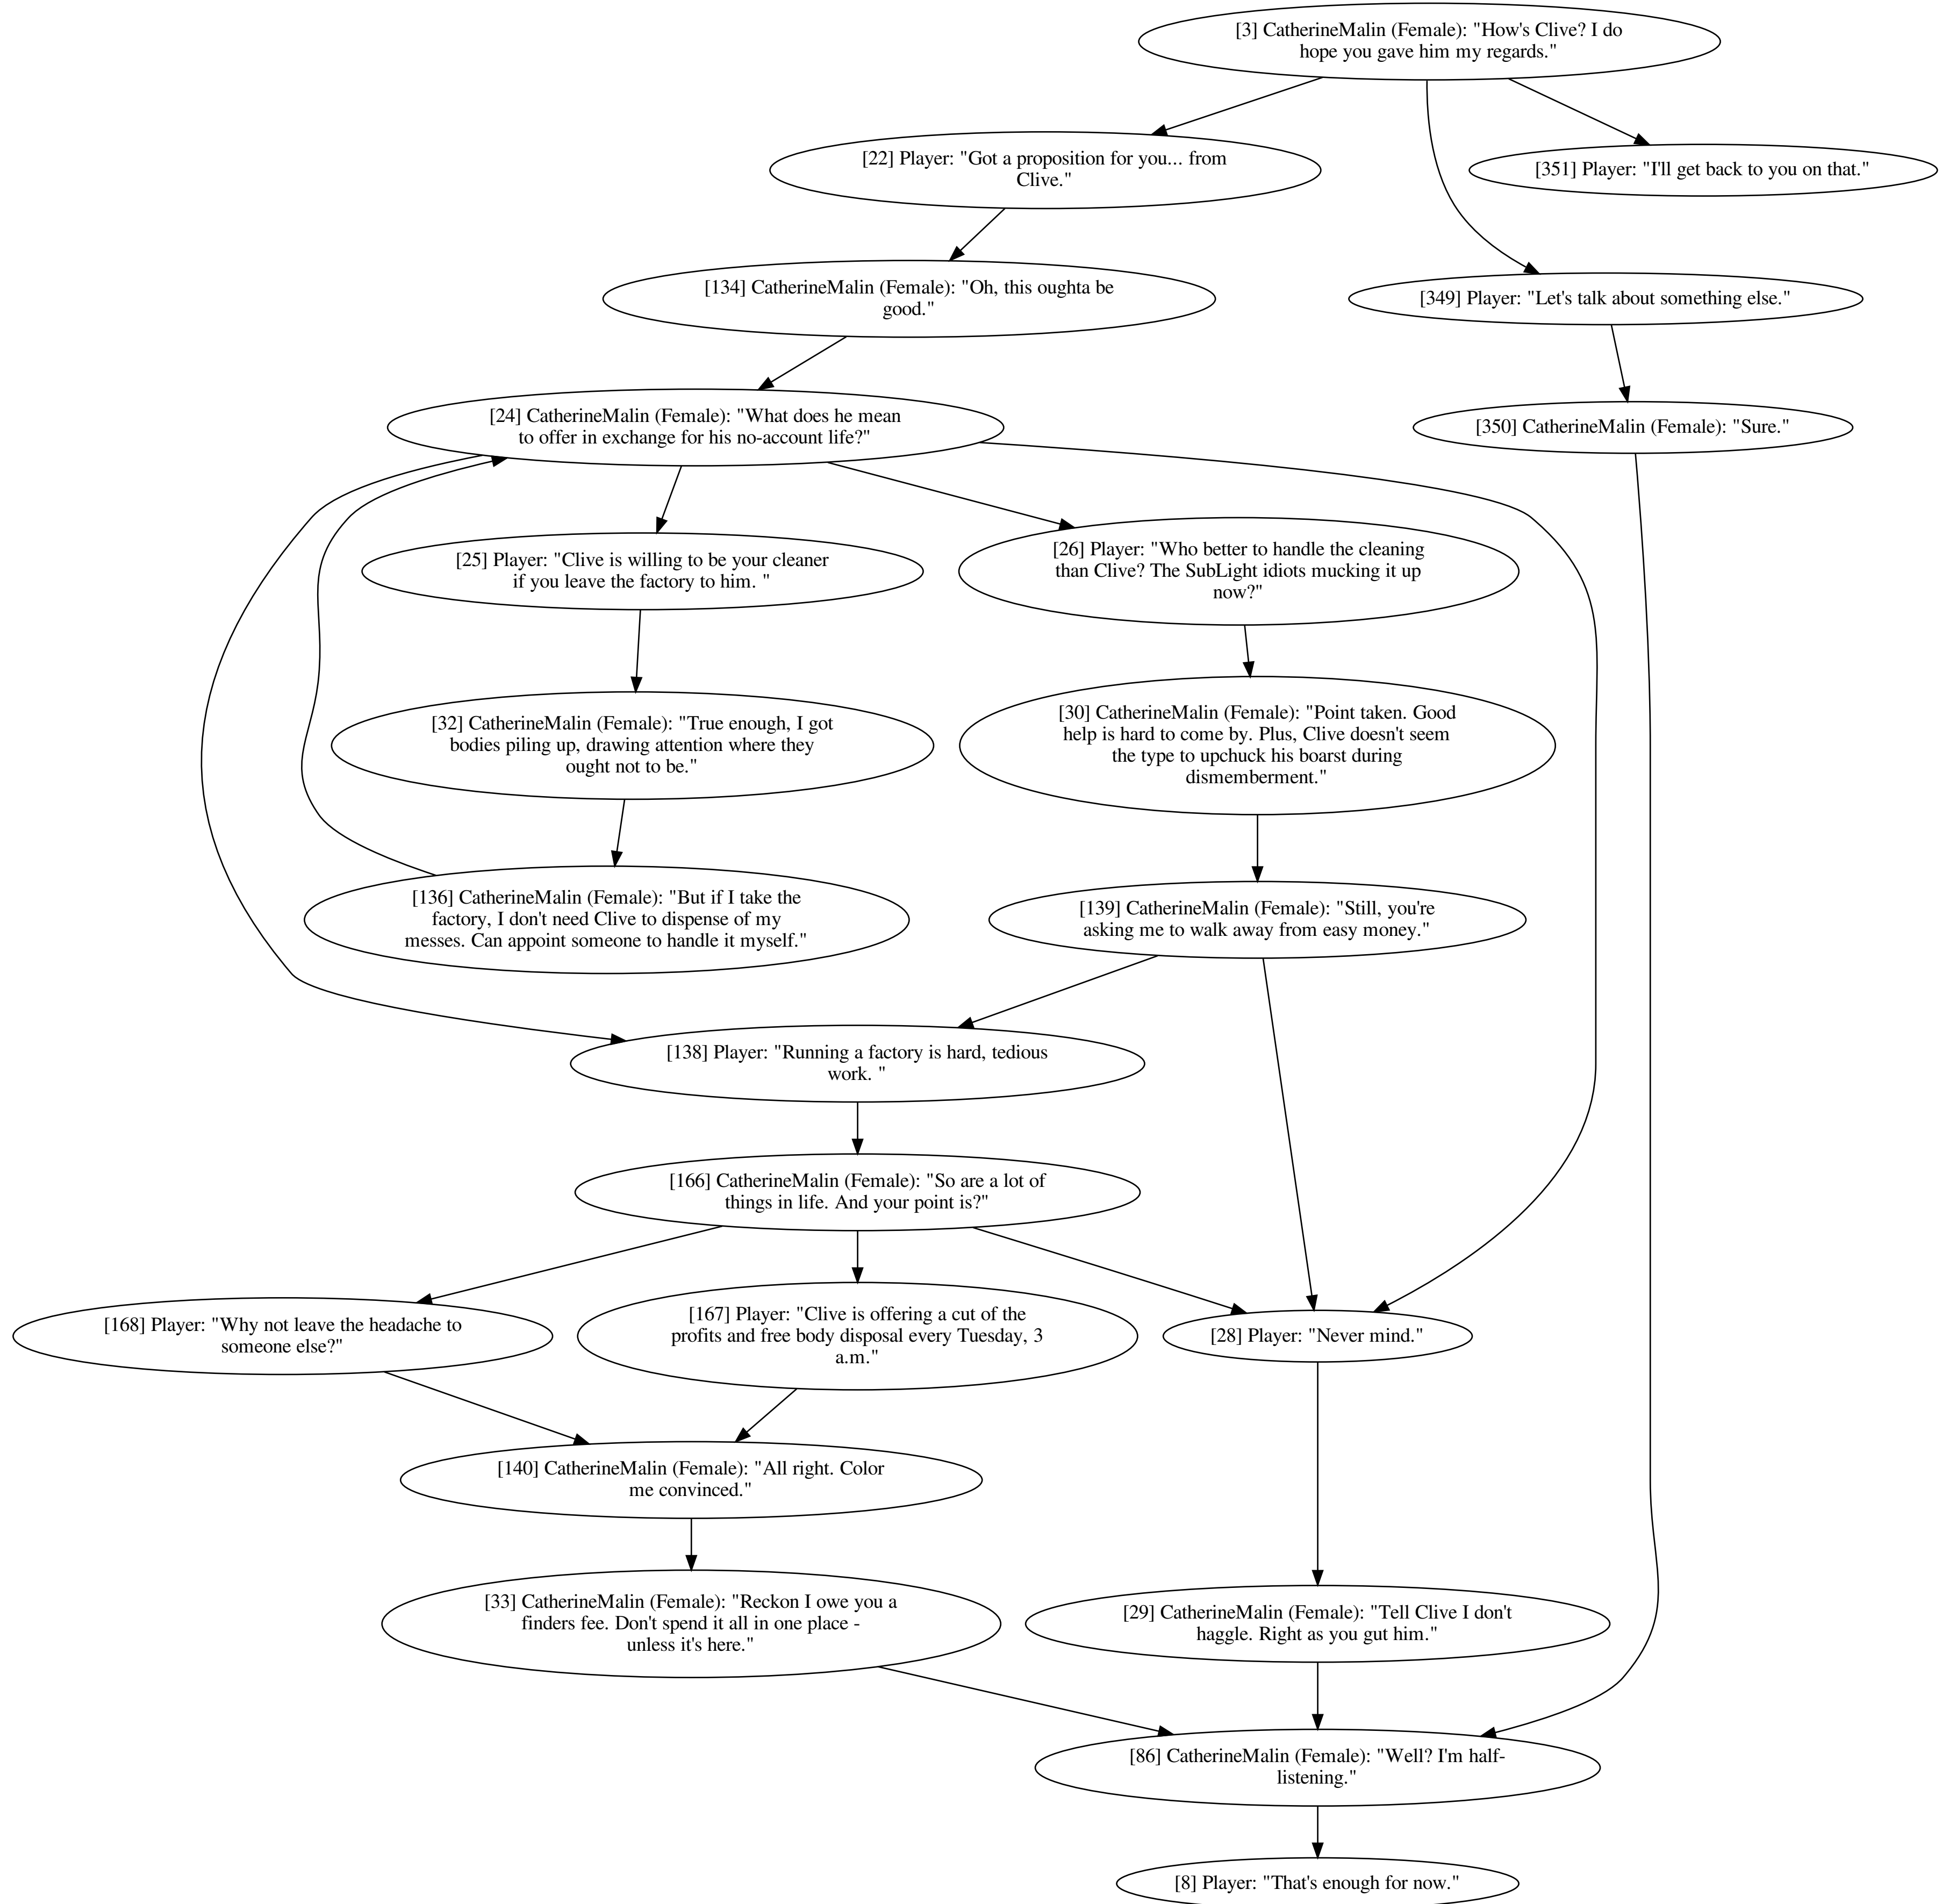

Supplement: software [file 2024.emnlp-main.520.software.zip]

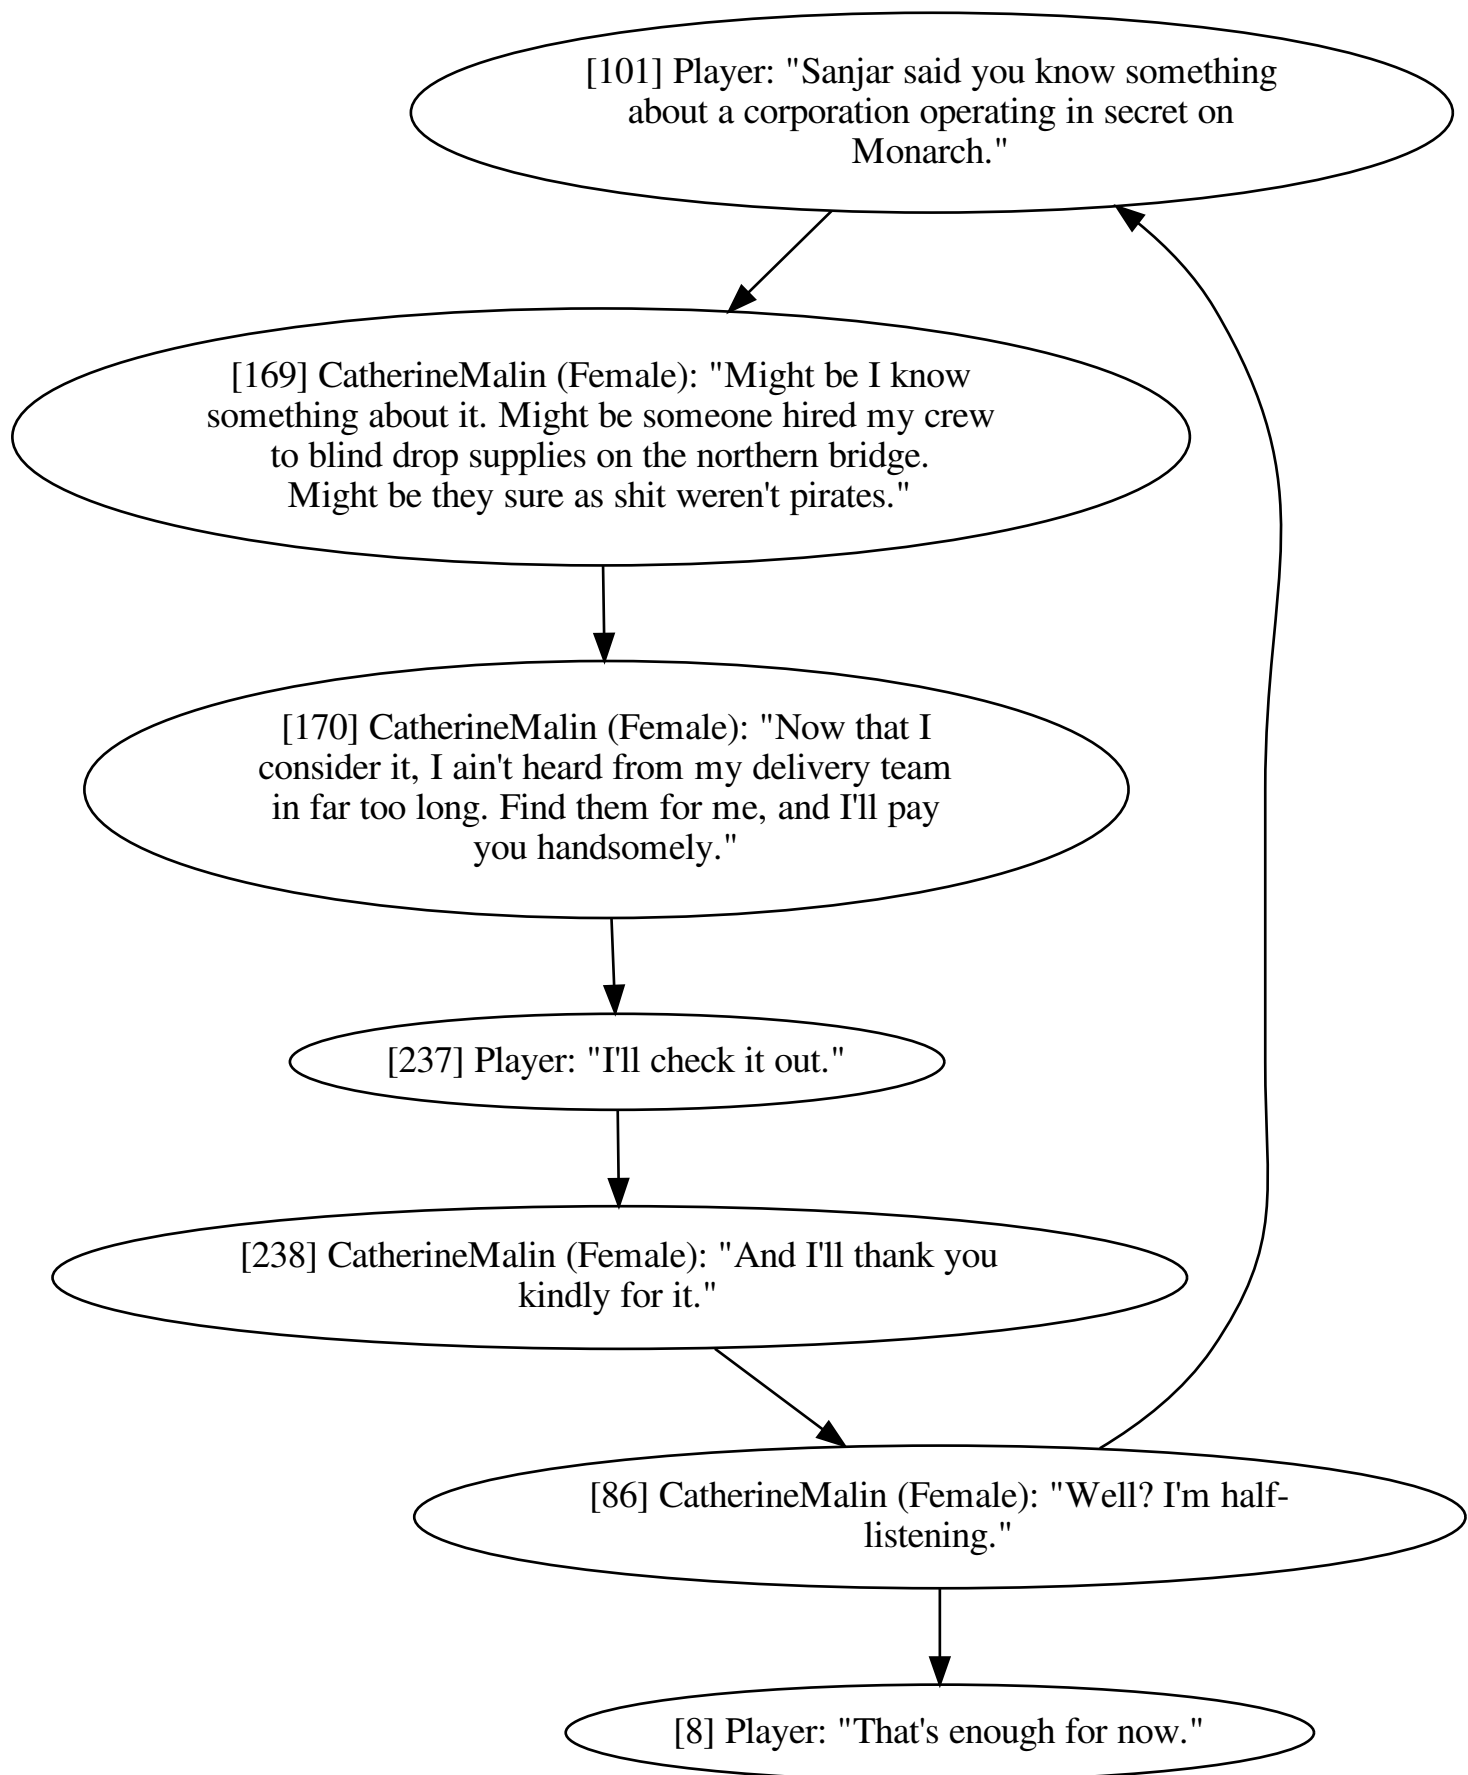

Supplement: software [file 2024.emnlp-main.520.software.zip]

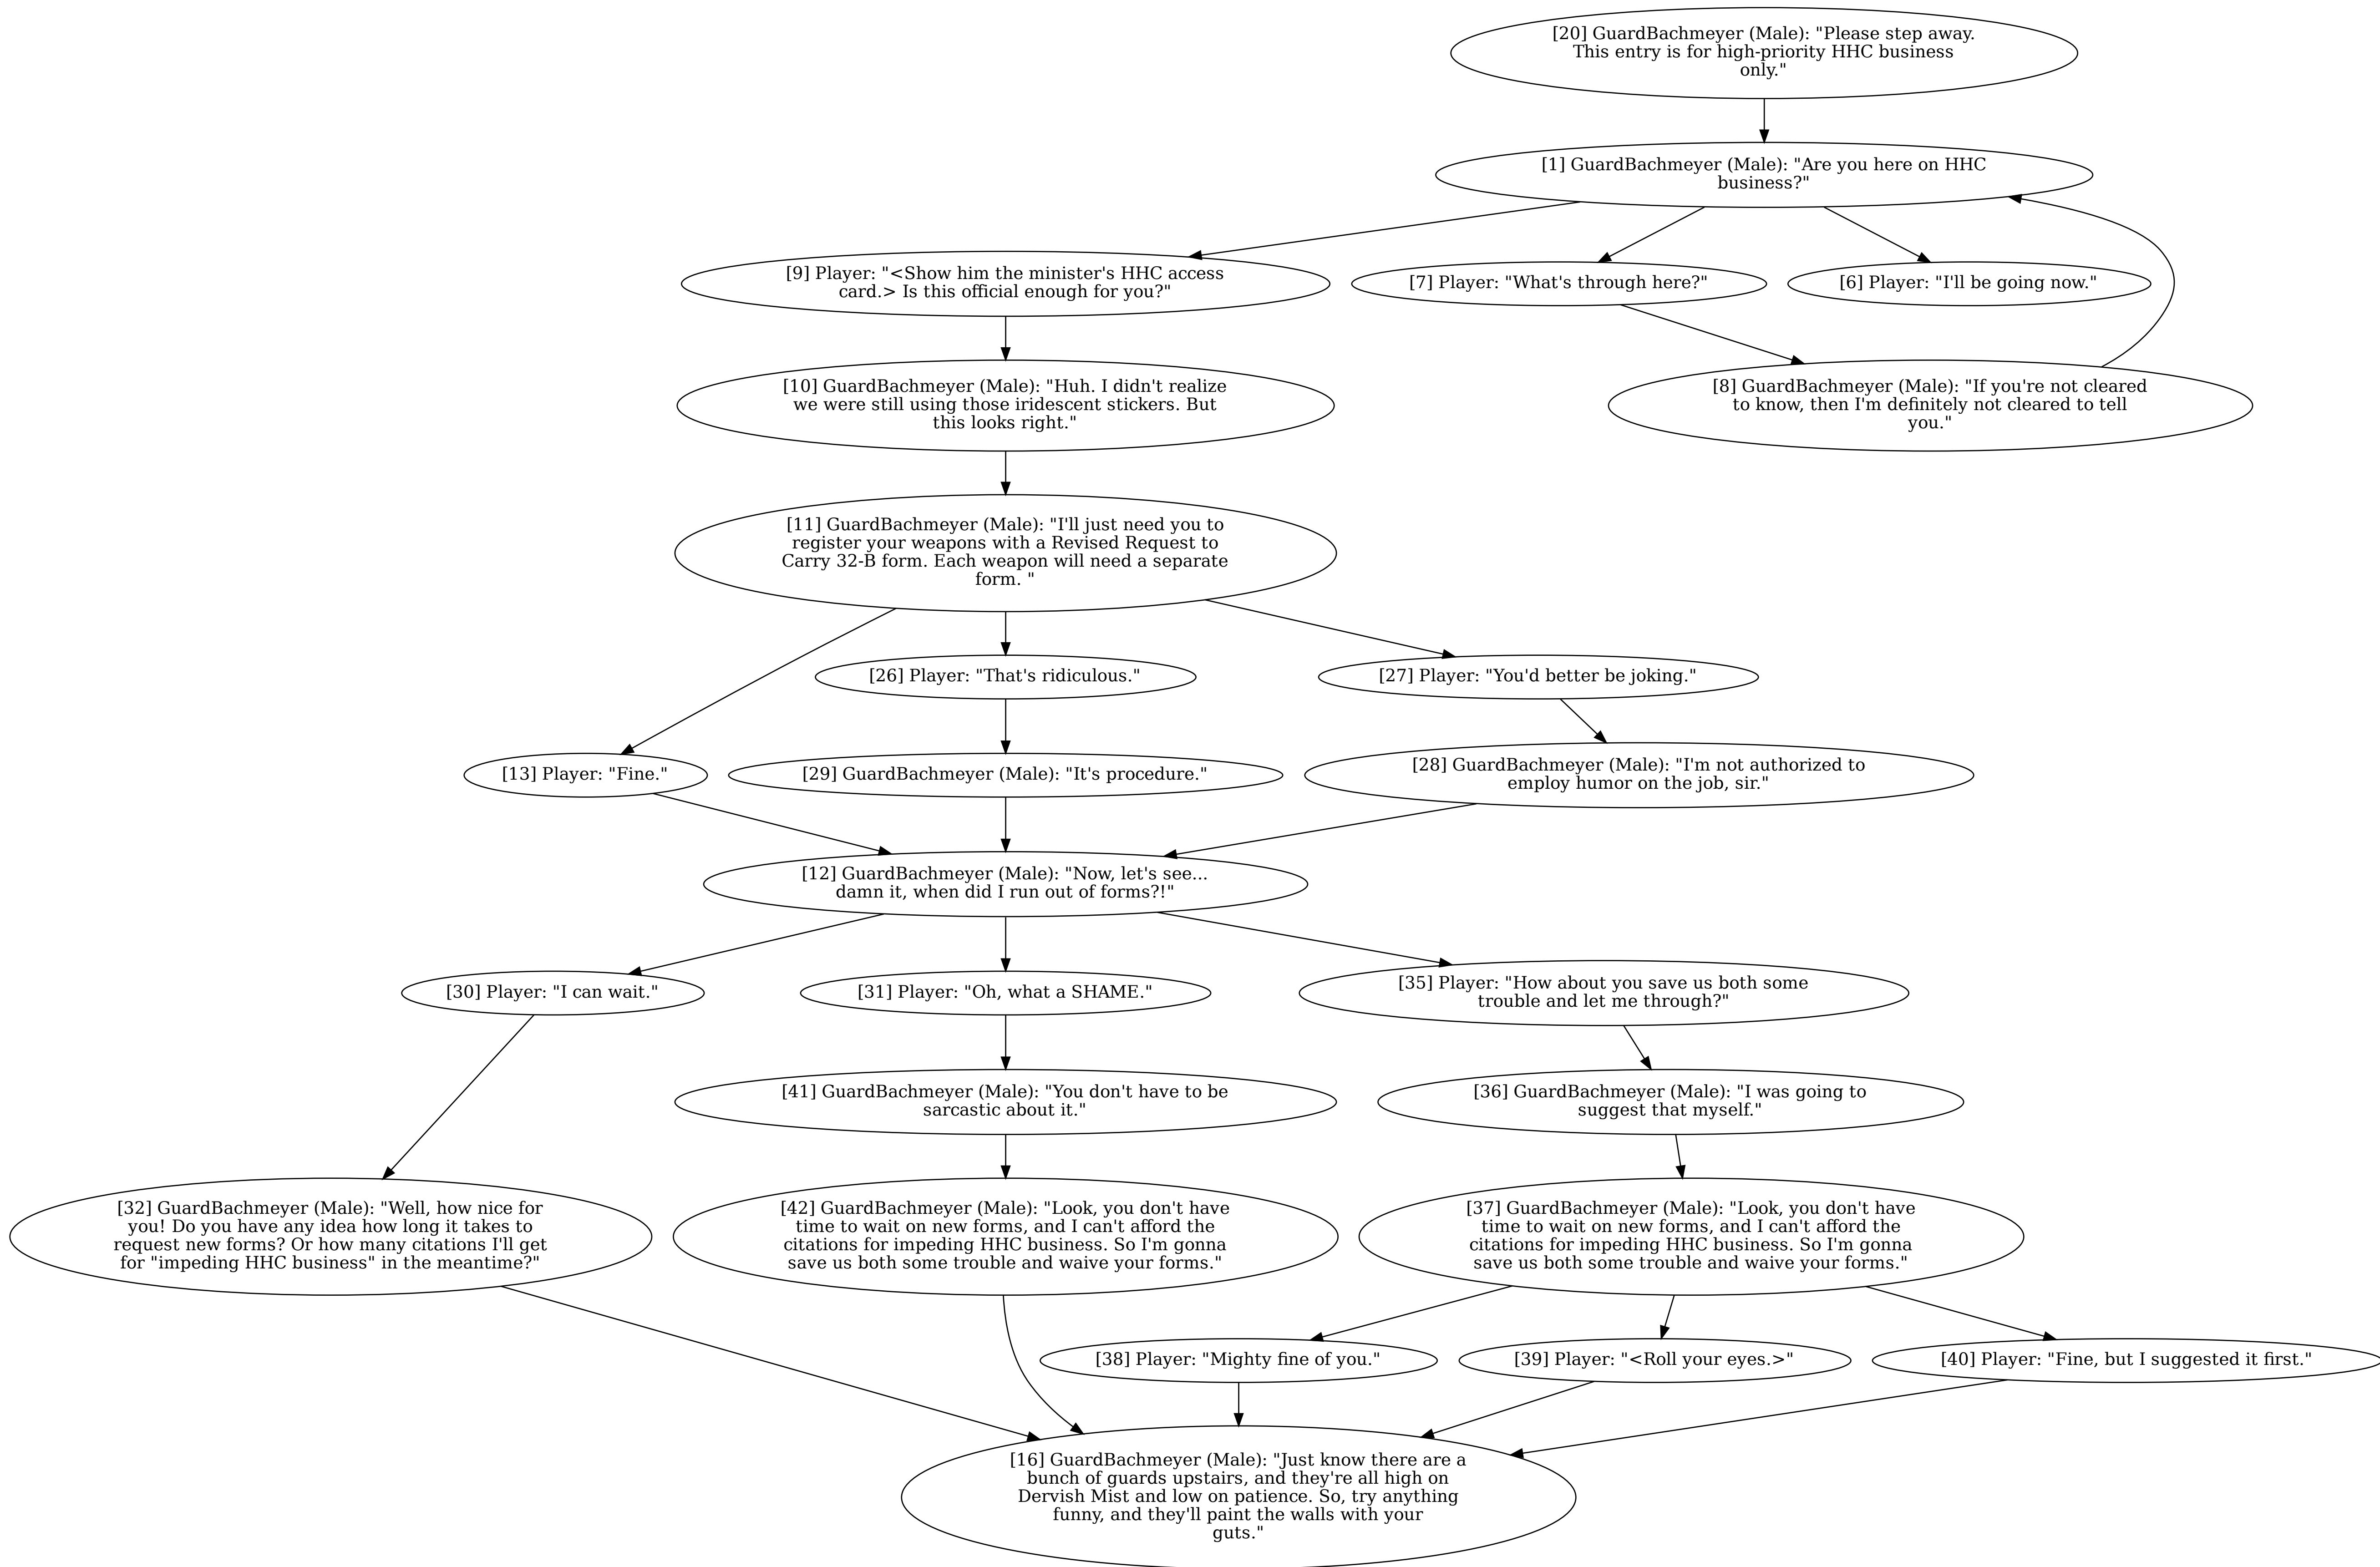

Supplement: software [file 2024.emnlp-main.520.software.zip]

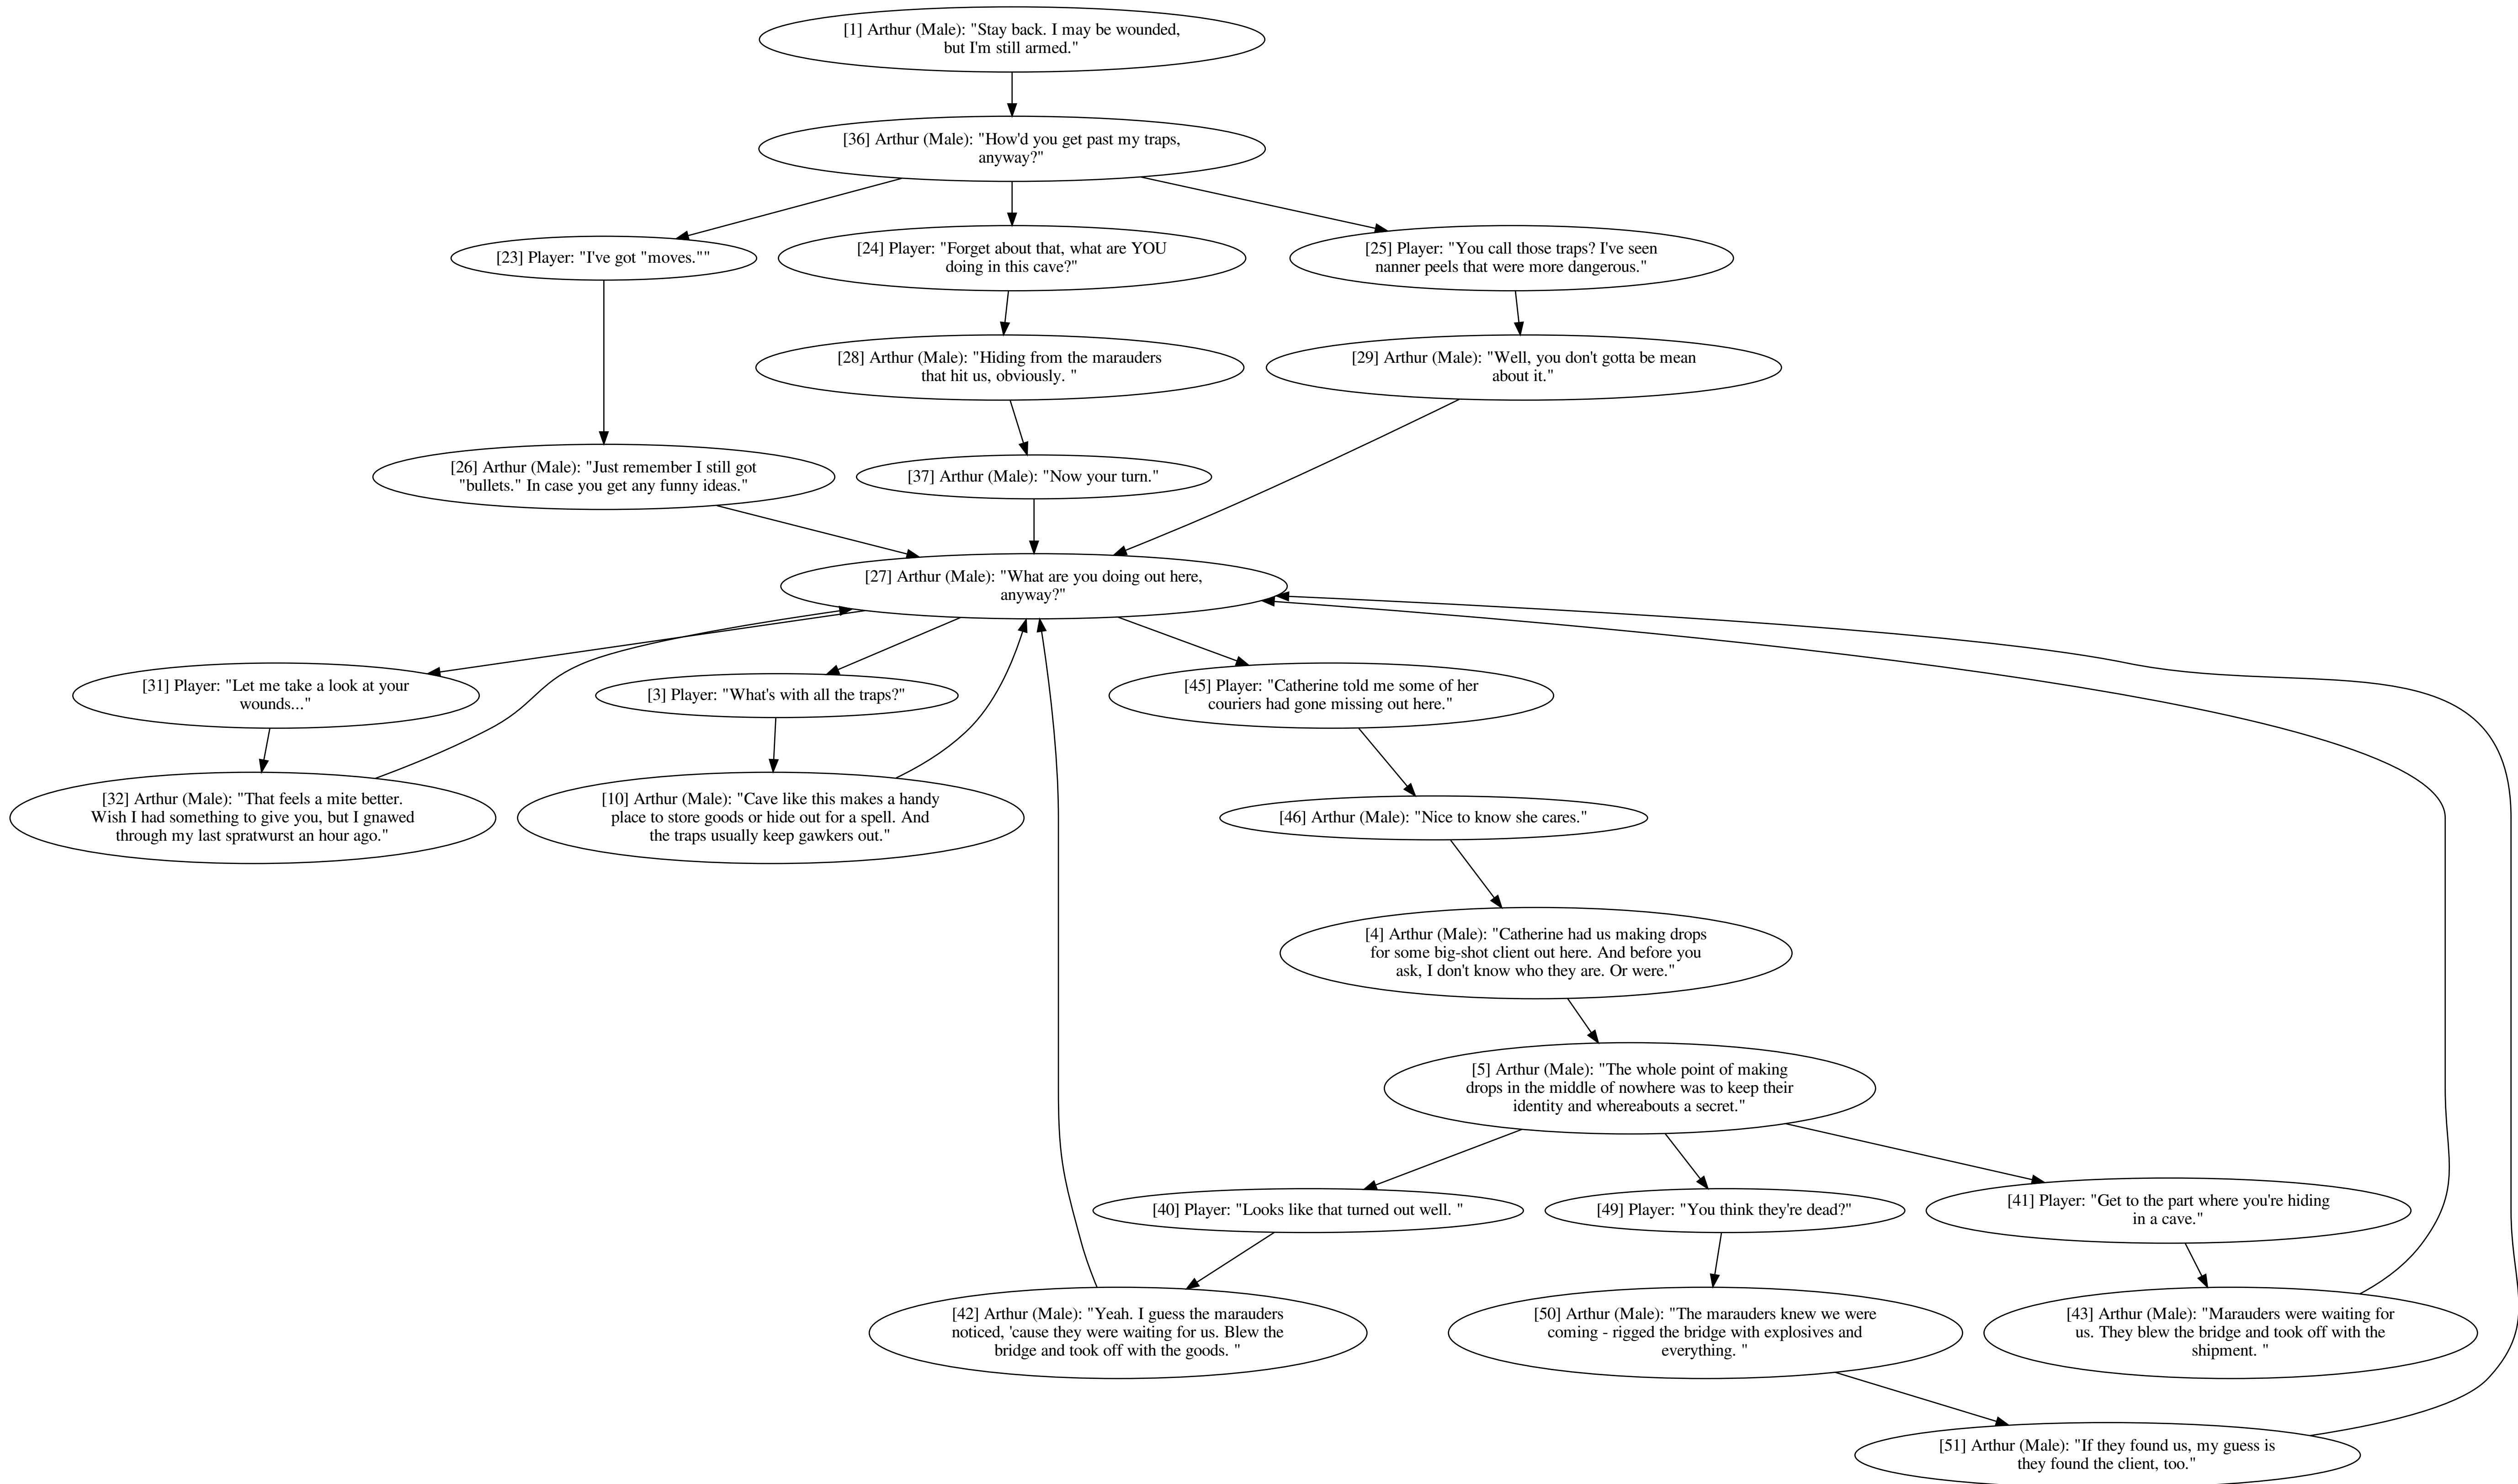

Supplement: software [file 2024.emnlp-main.520.software.zip]

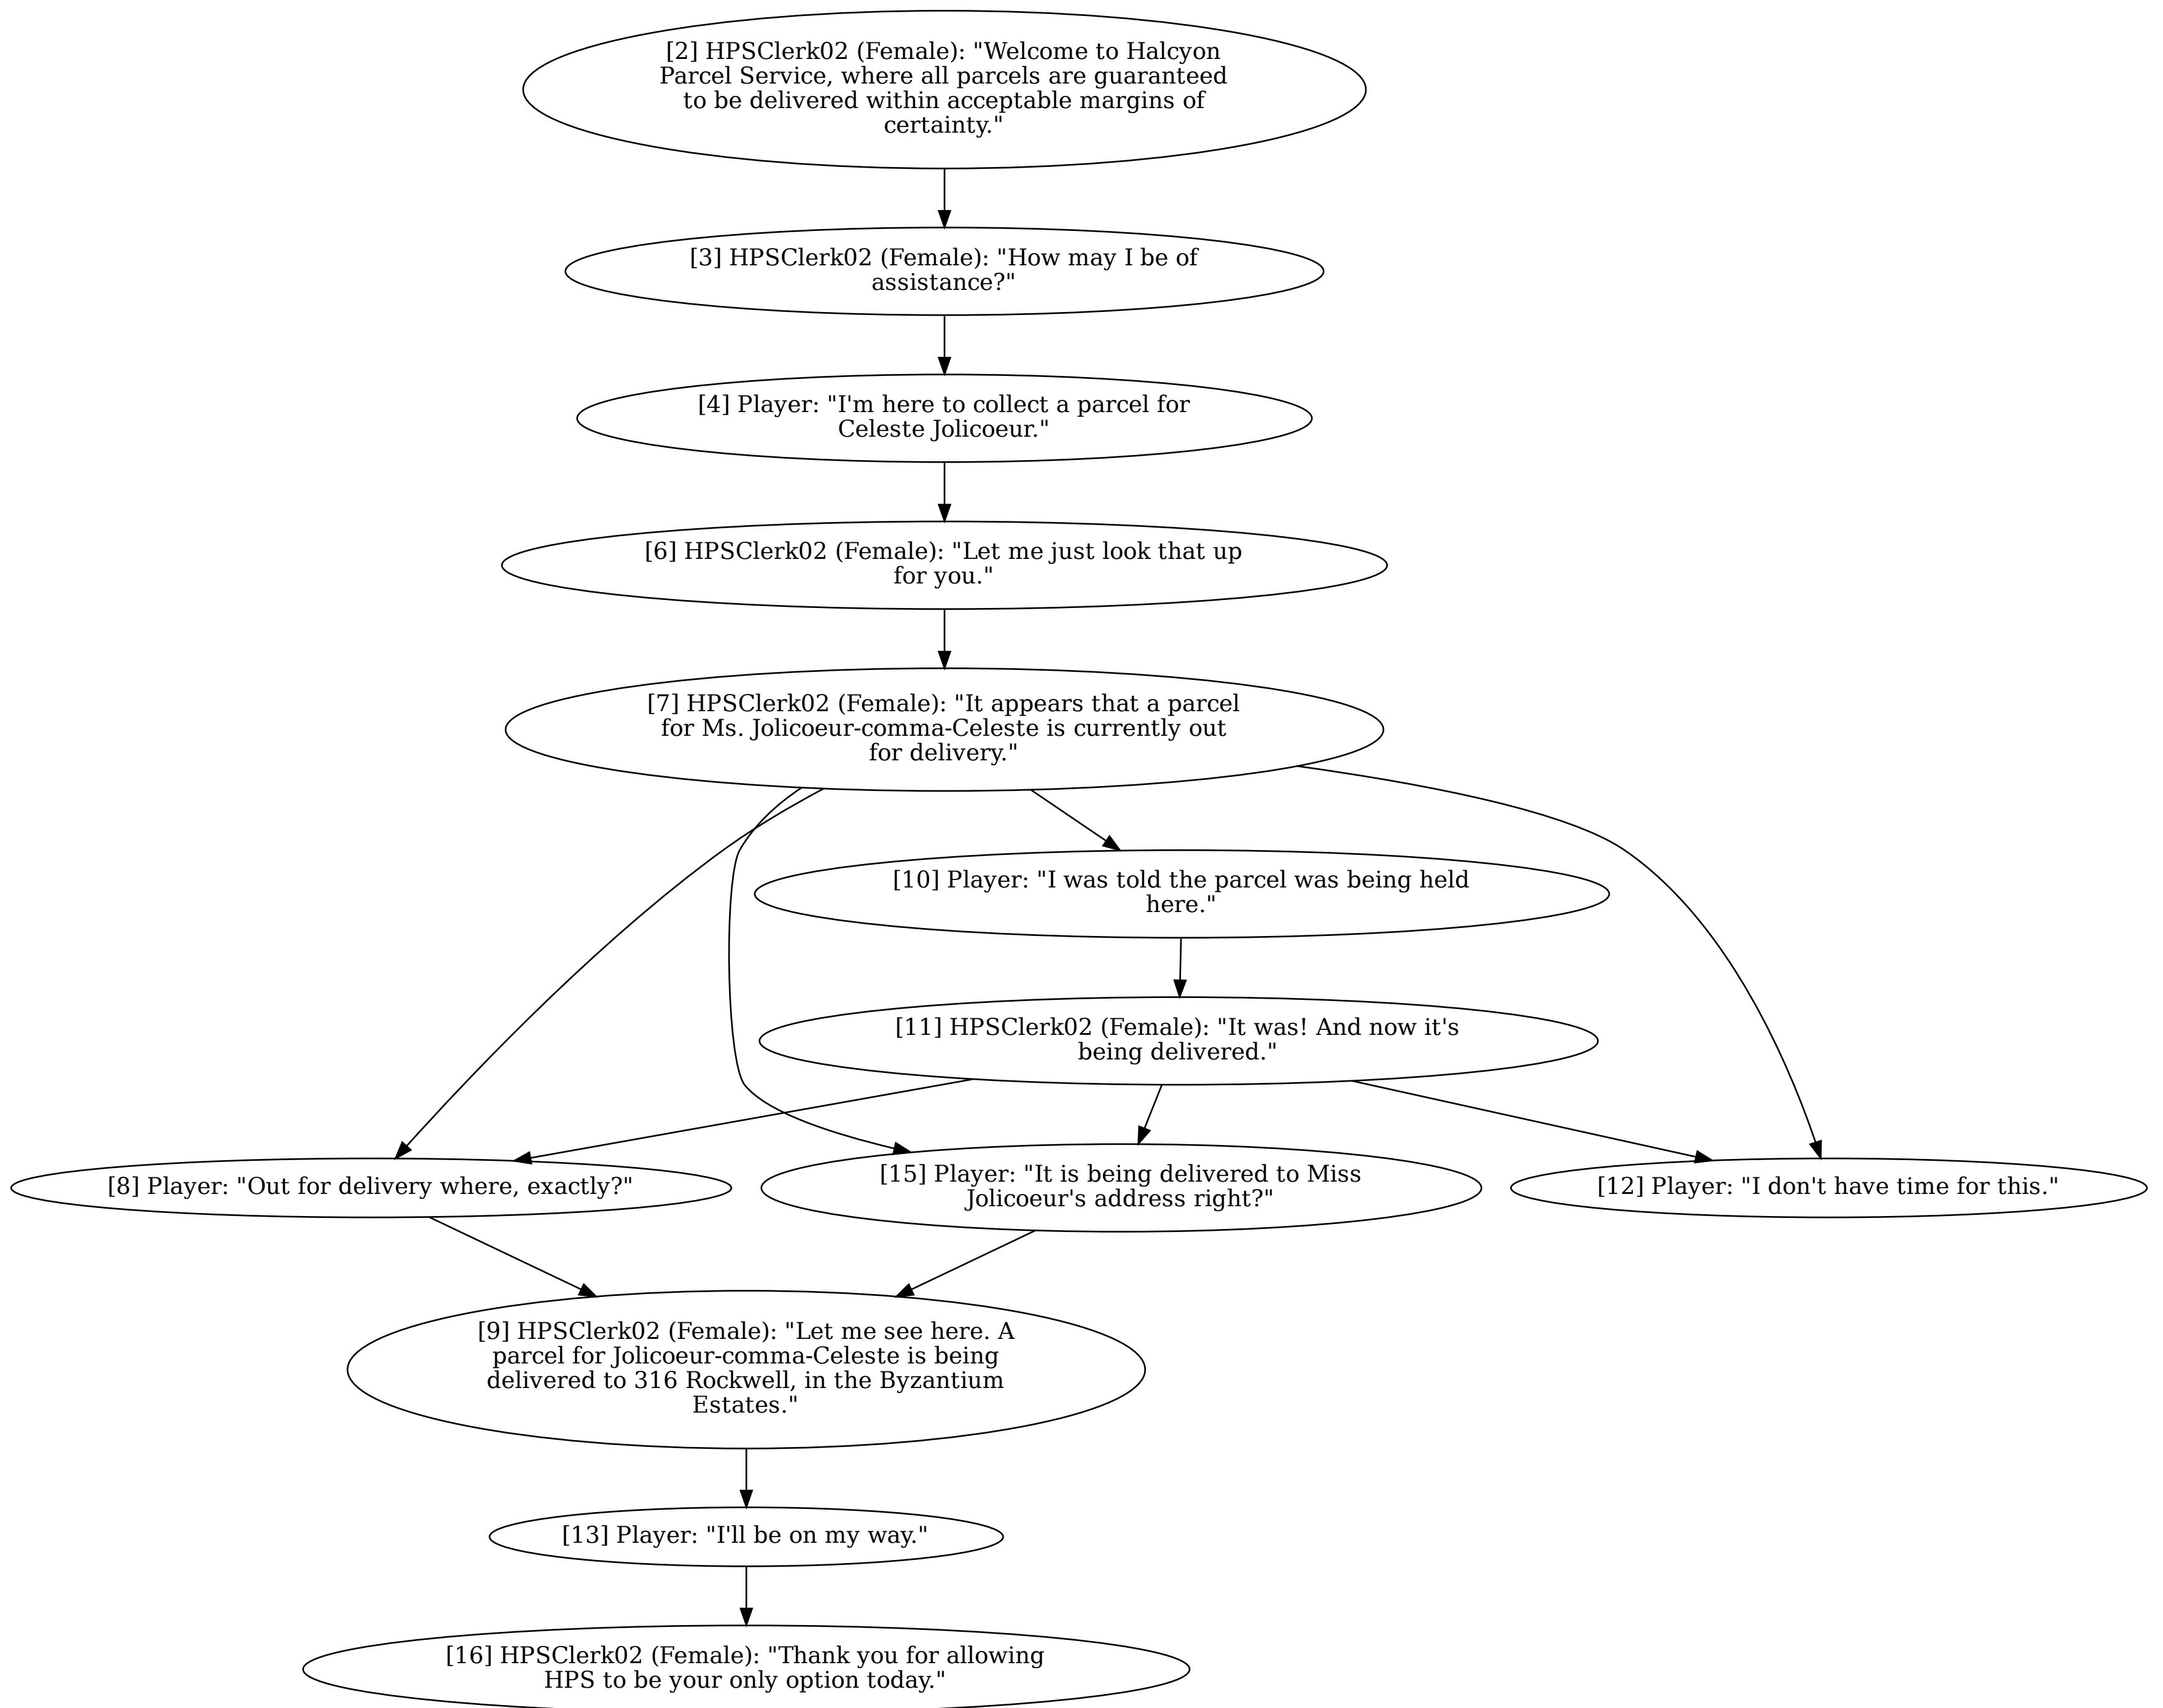

Supplement: software [file 2024.emnlp-main.520.software.zip]

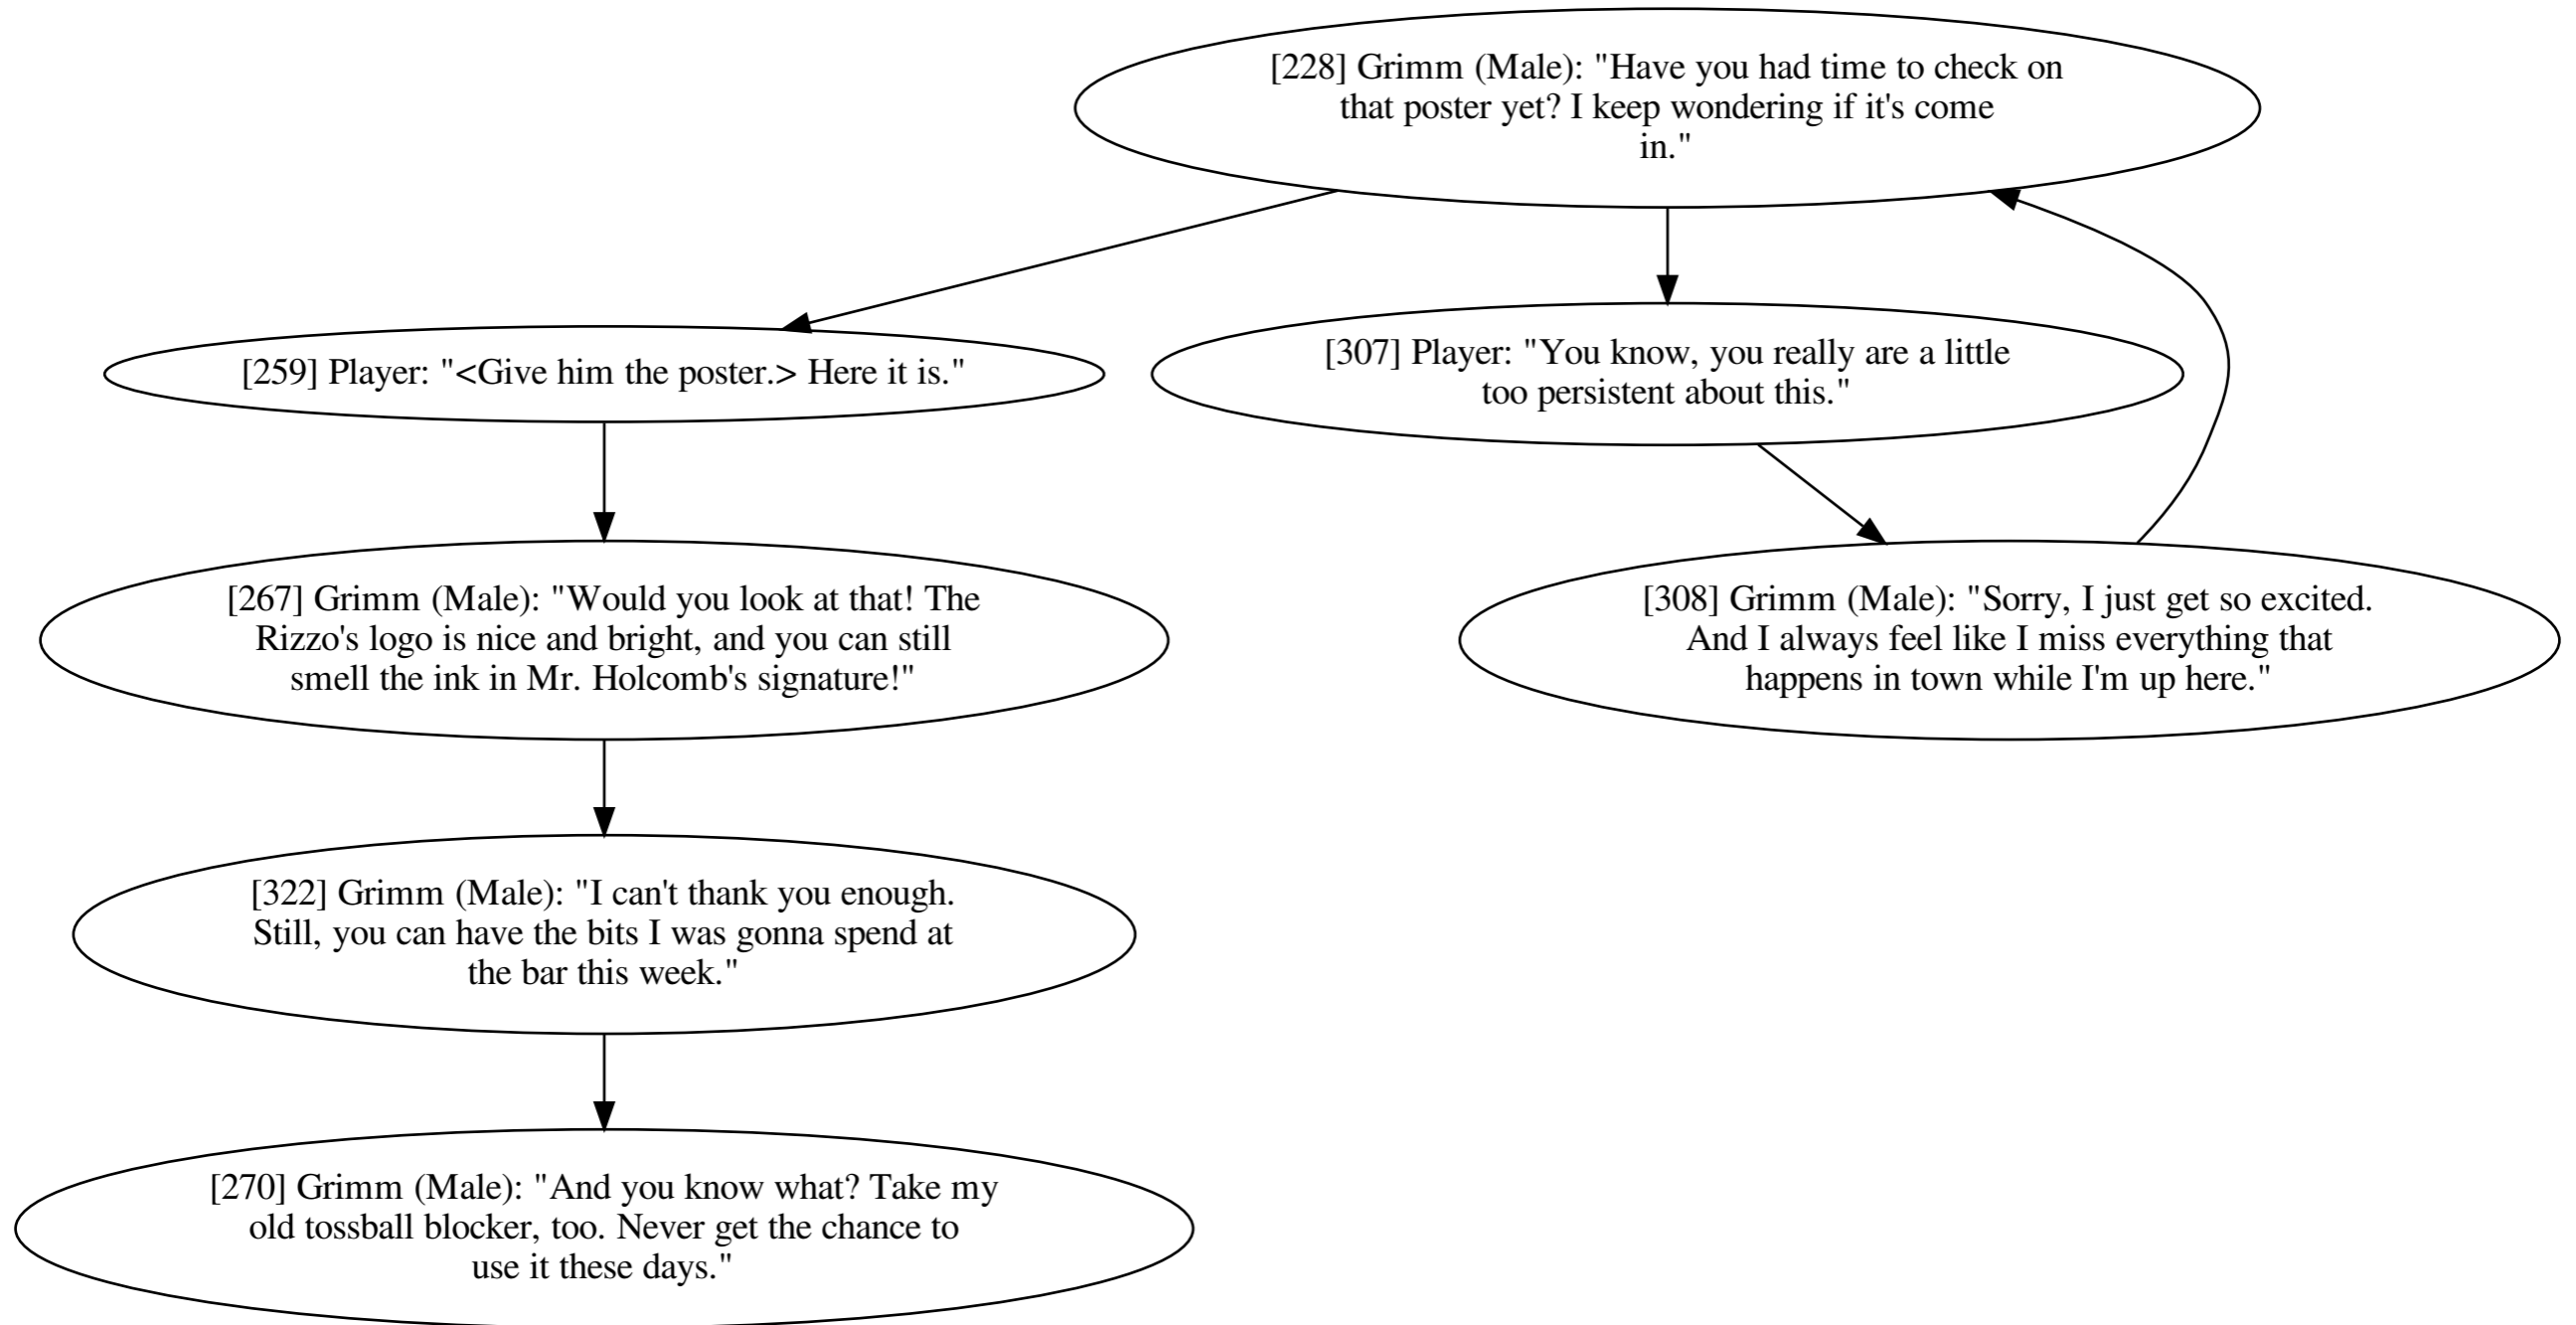

Supplement: software [file 2024.emnlp-main.520.software.zip]

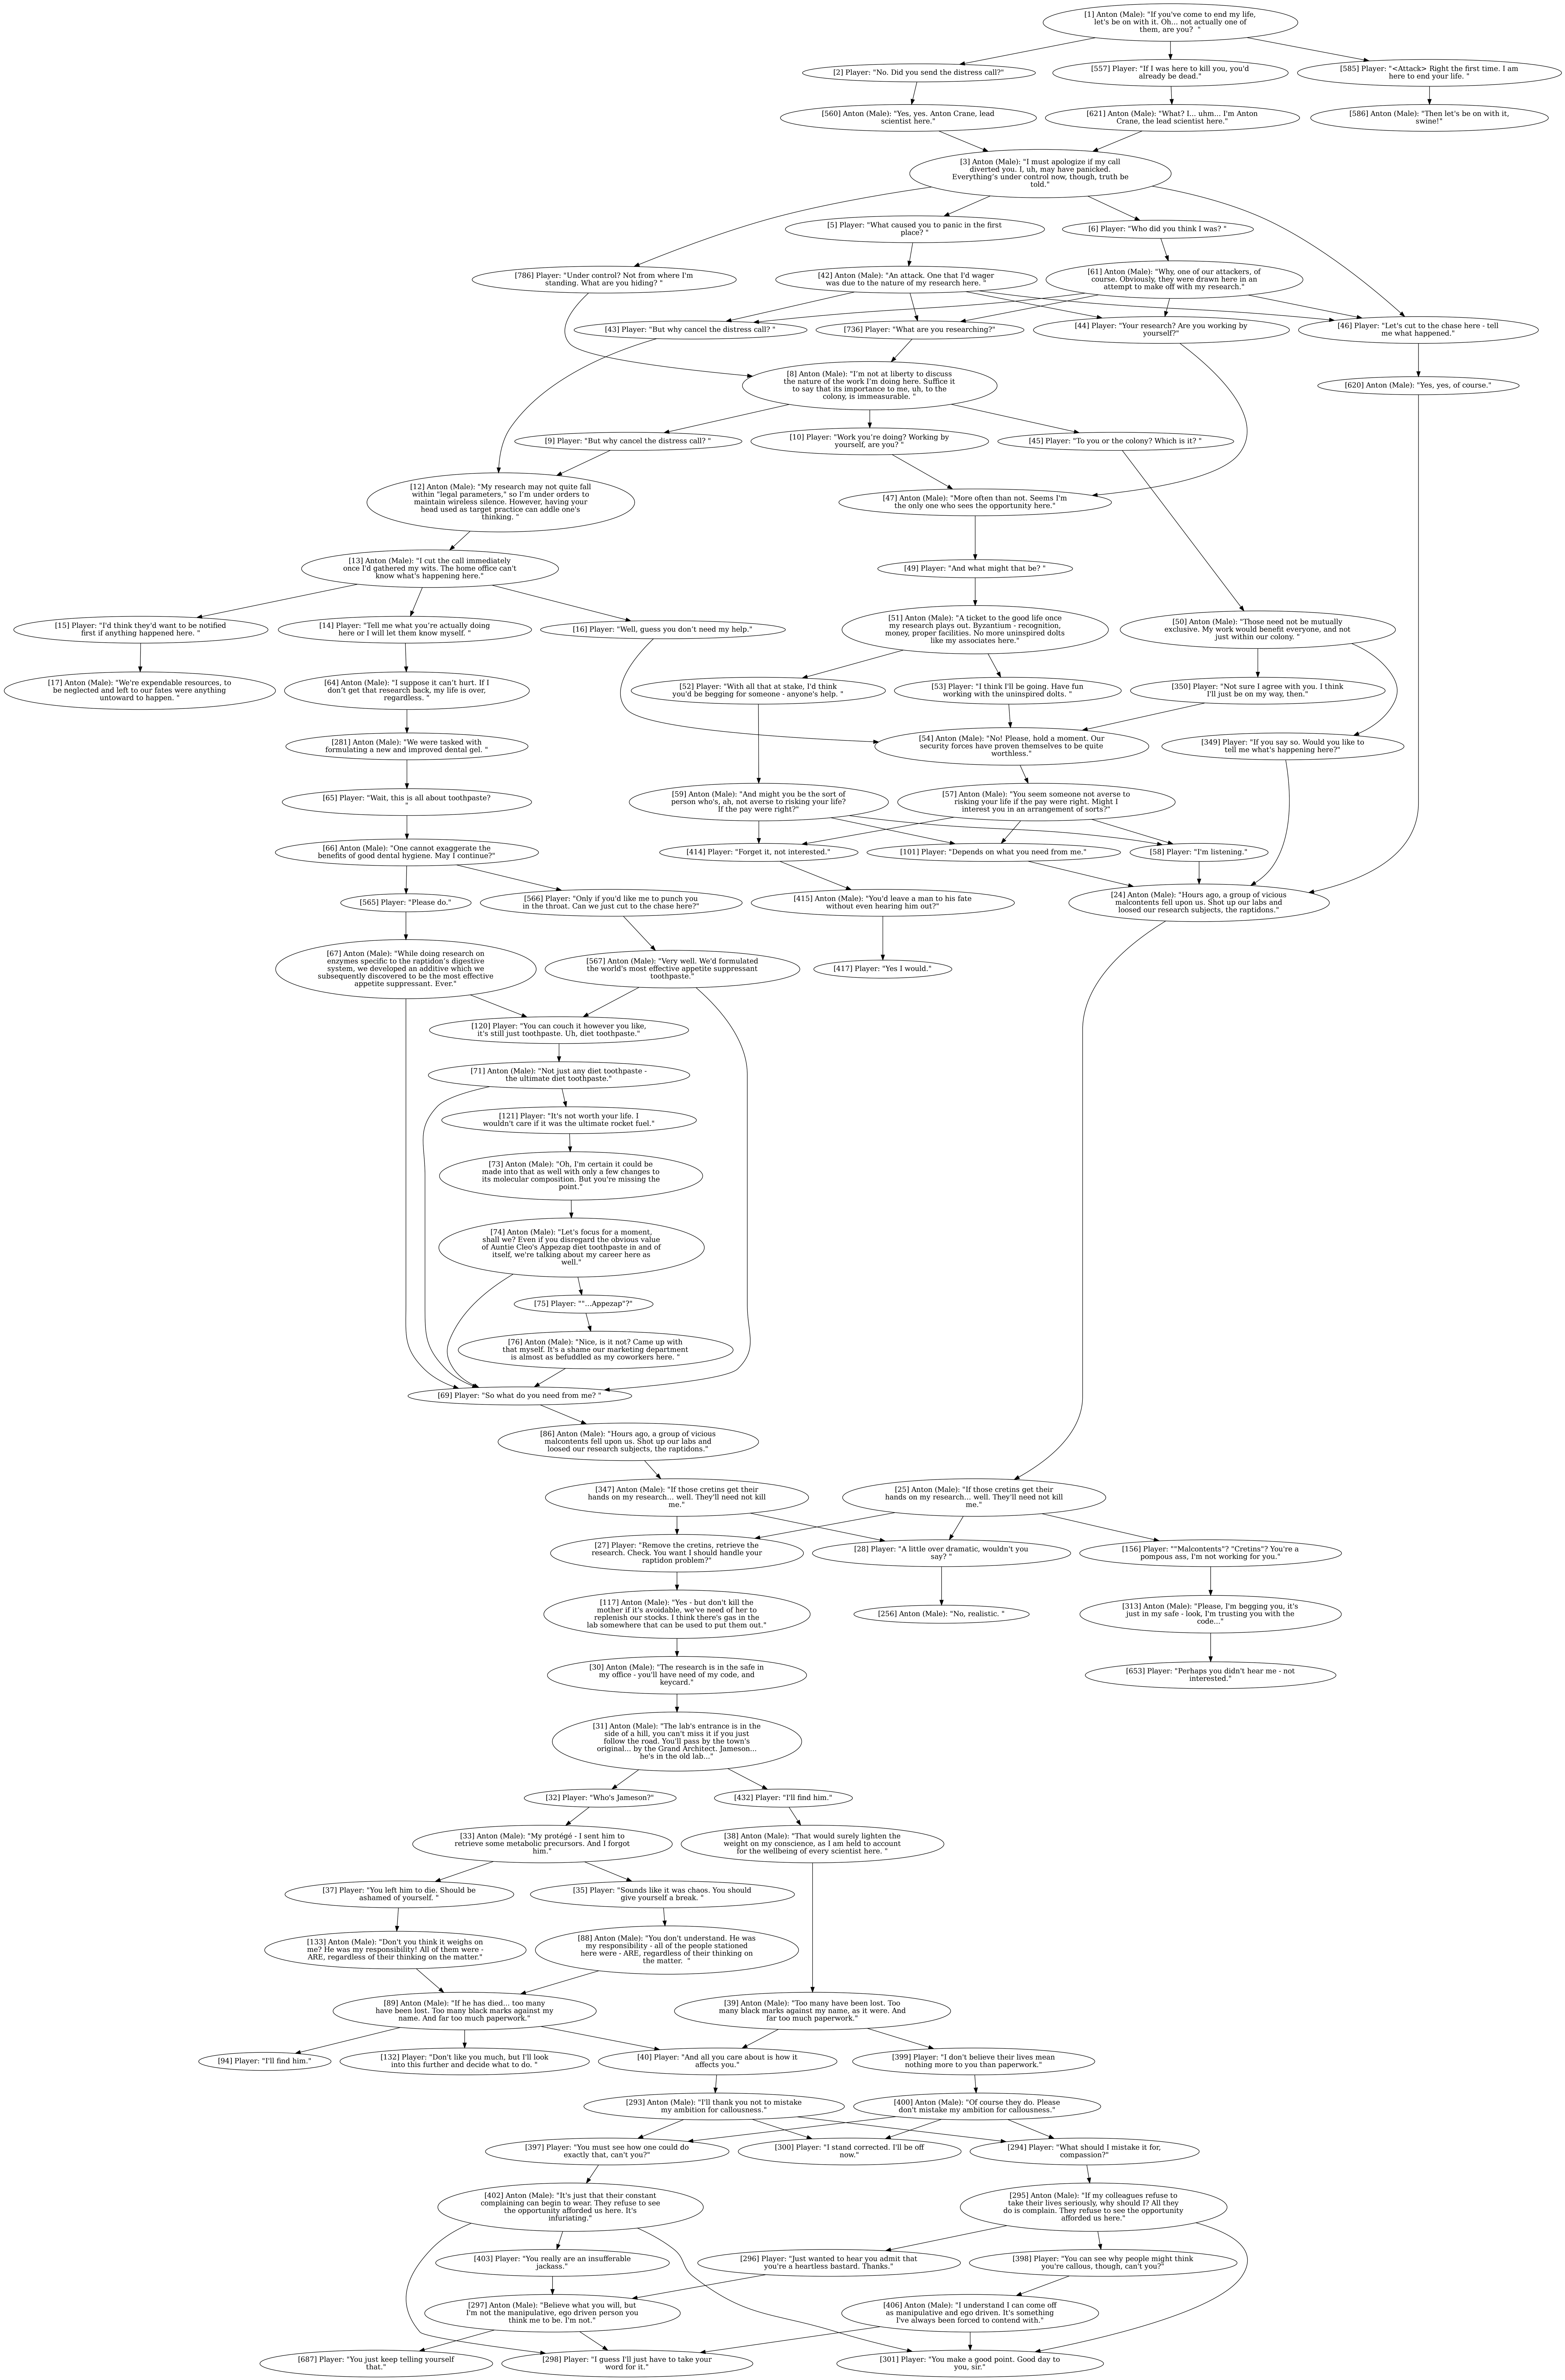

Supplement: software [file 2024.emnlp-main.520.software.zip]

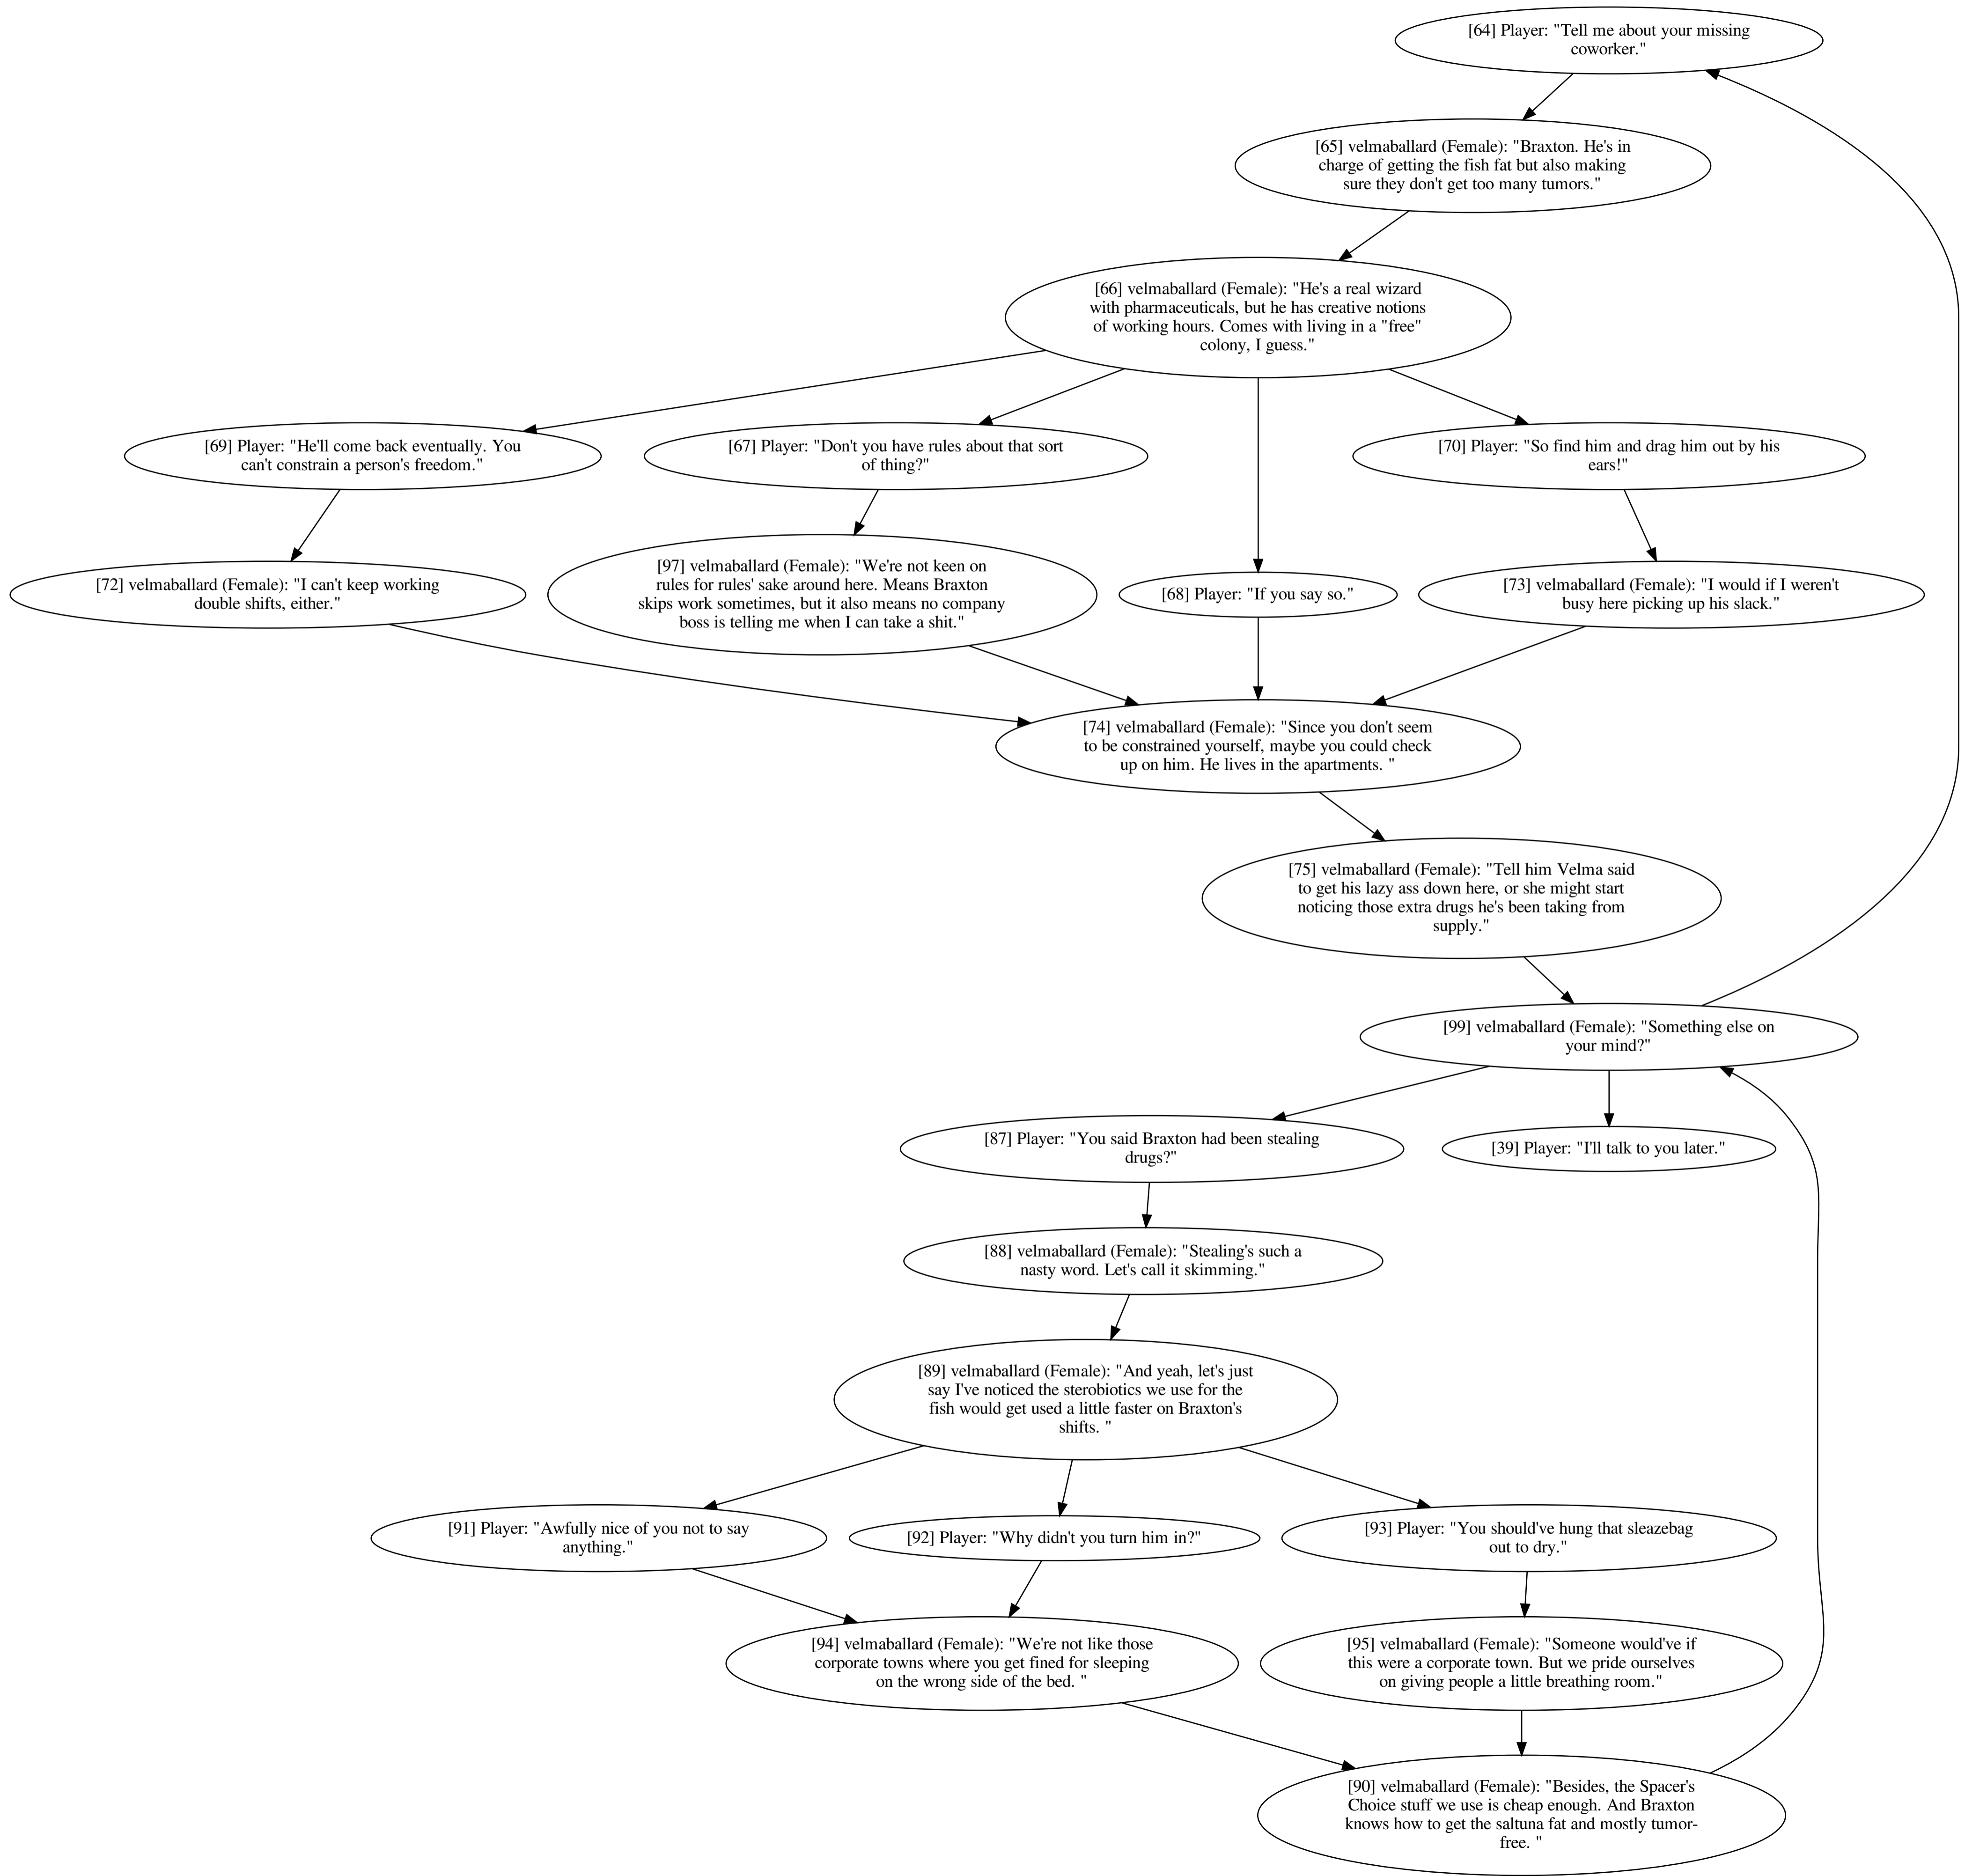

Supplement: software [file 2024.emnlp-main.520.software.zip]

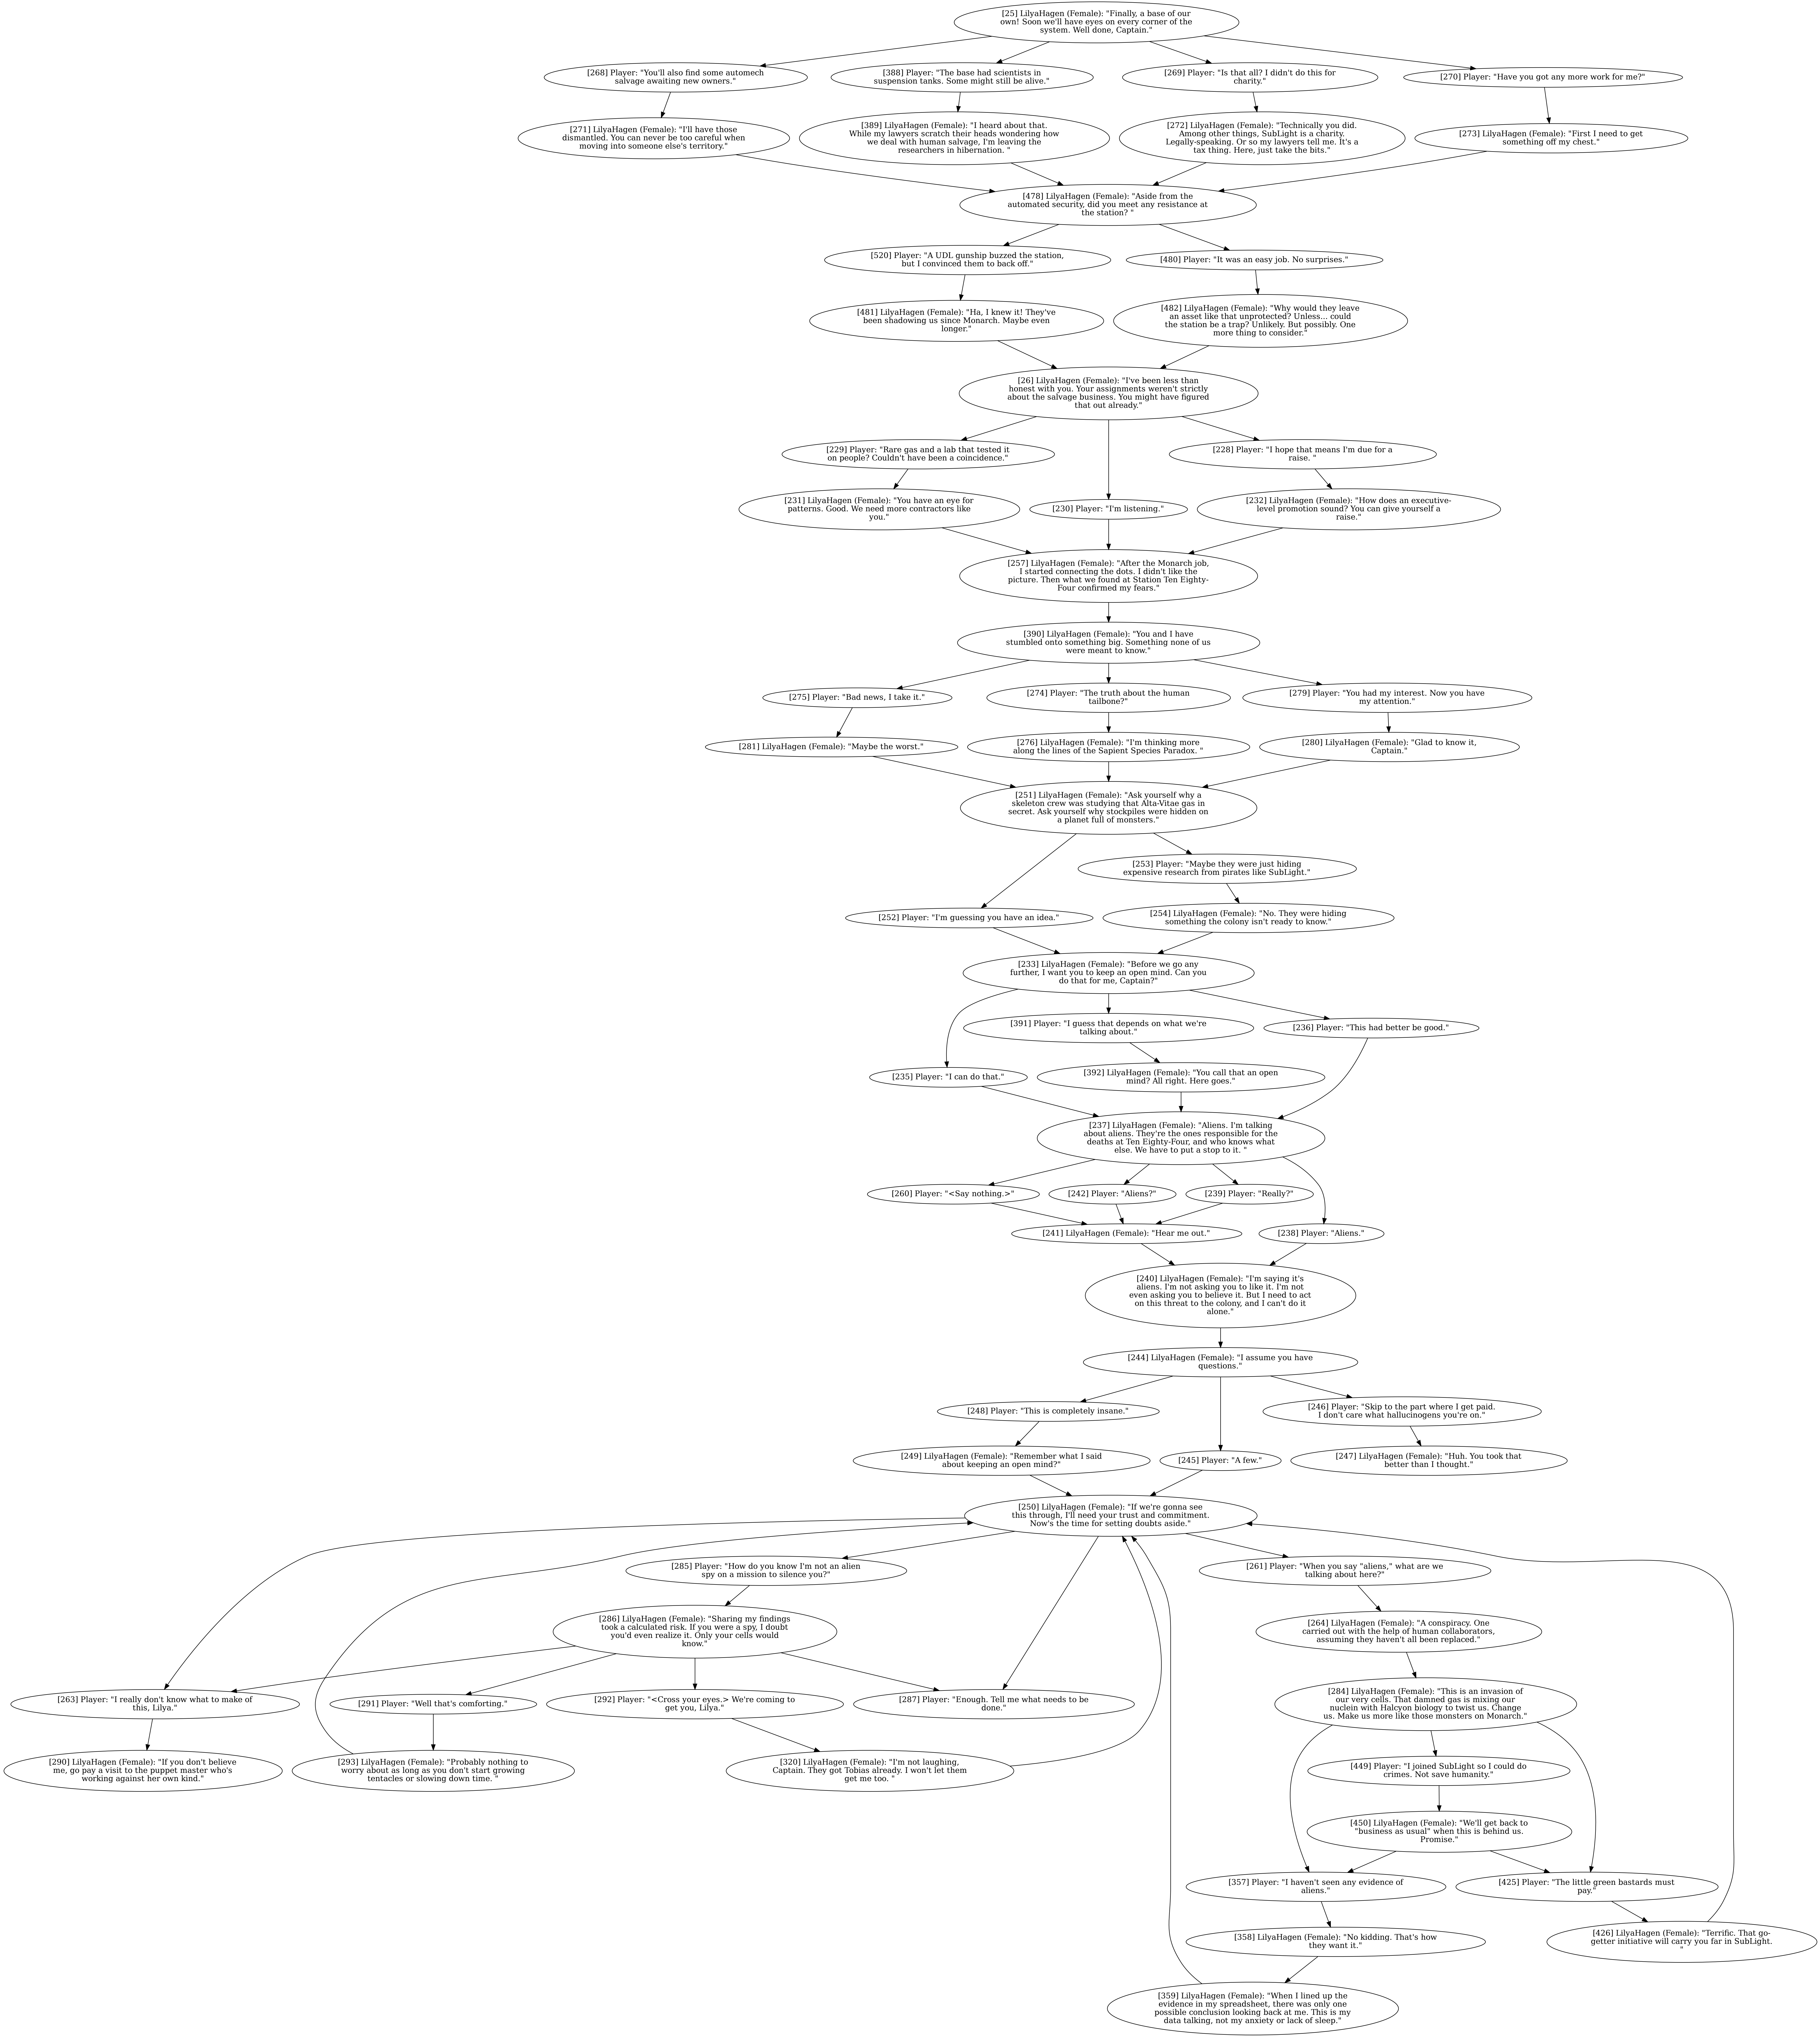

Supplement: software [file 2024.emnlp-main.520.software.zip]

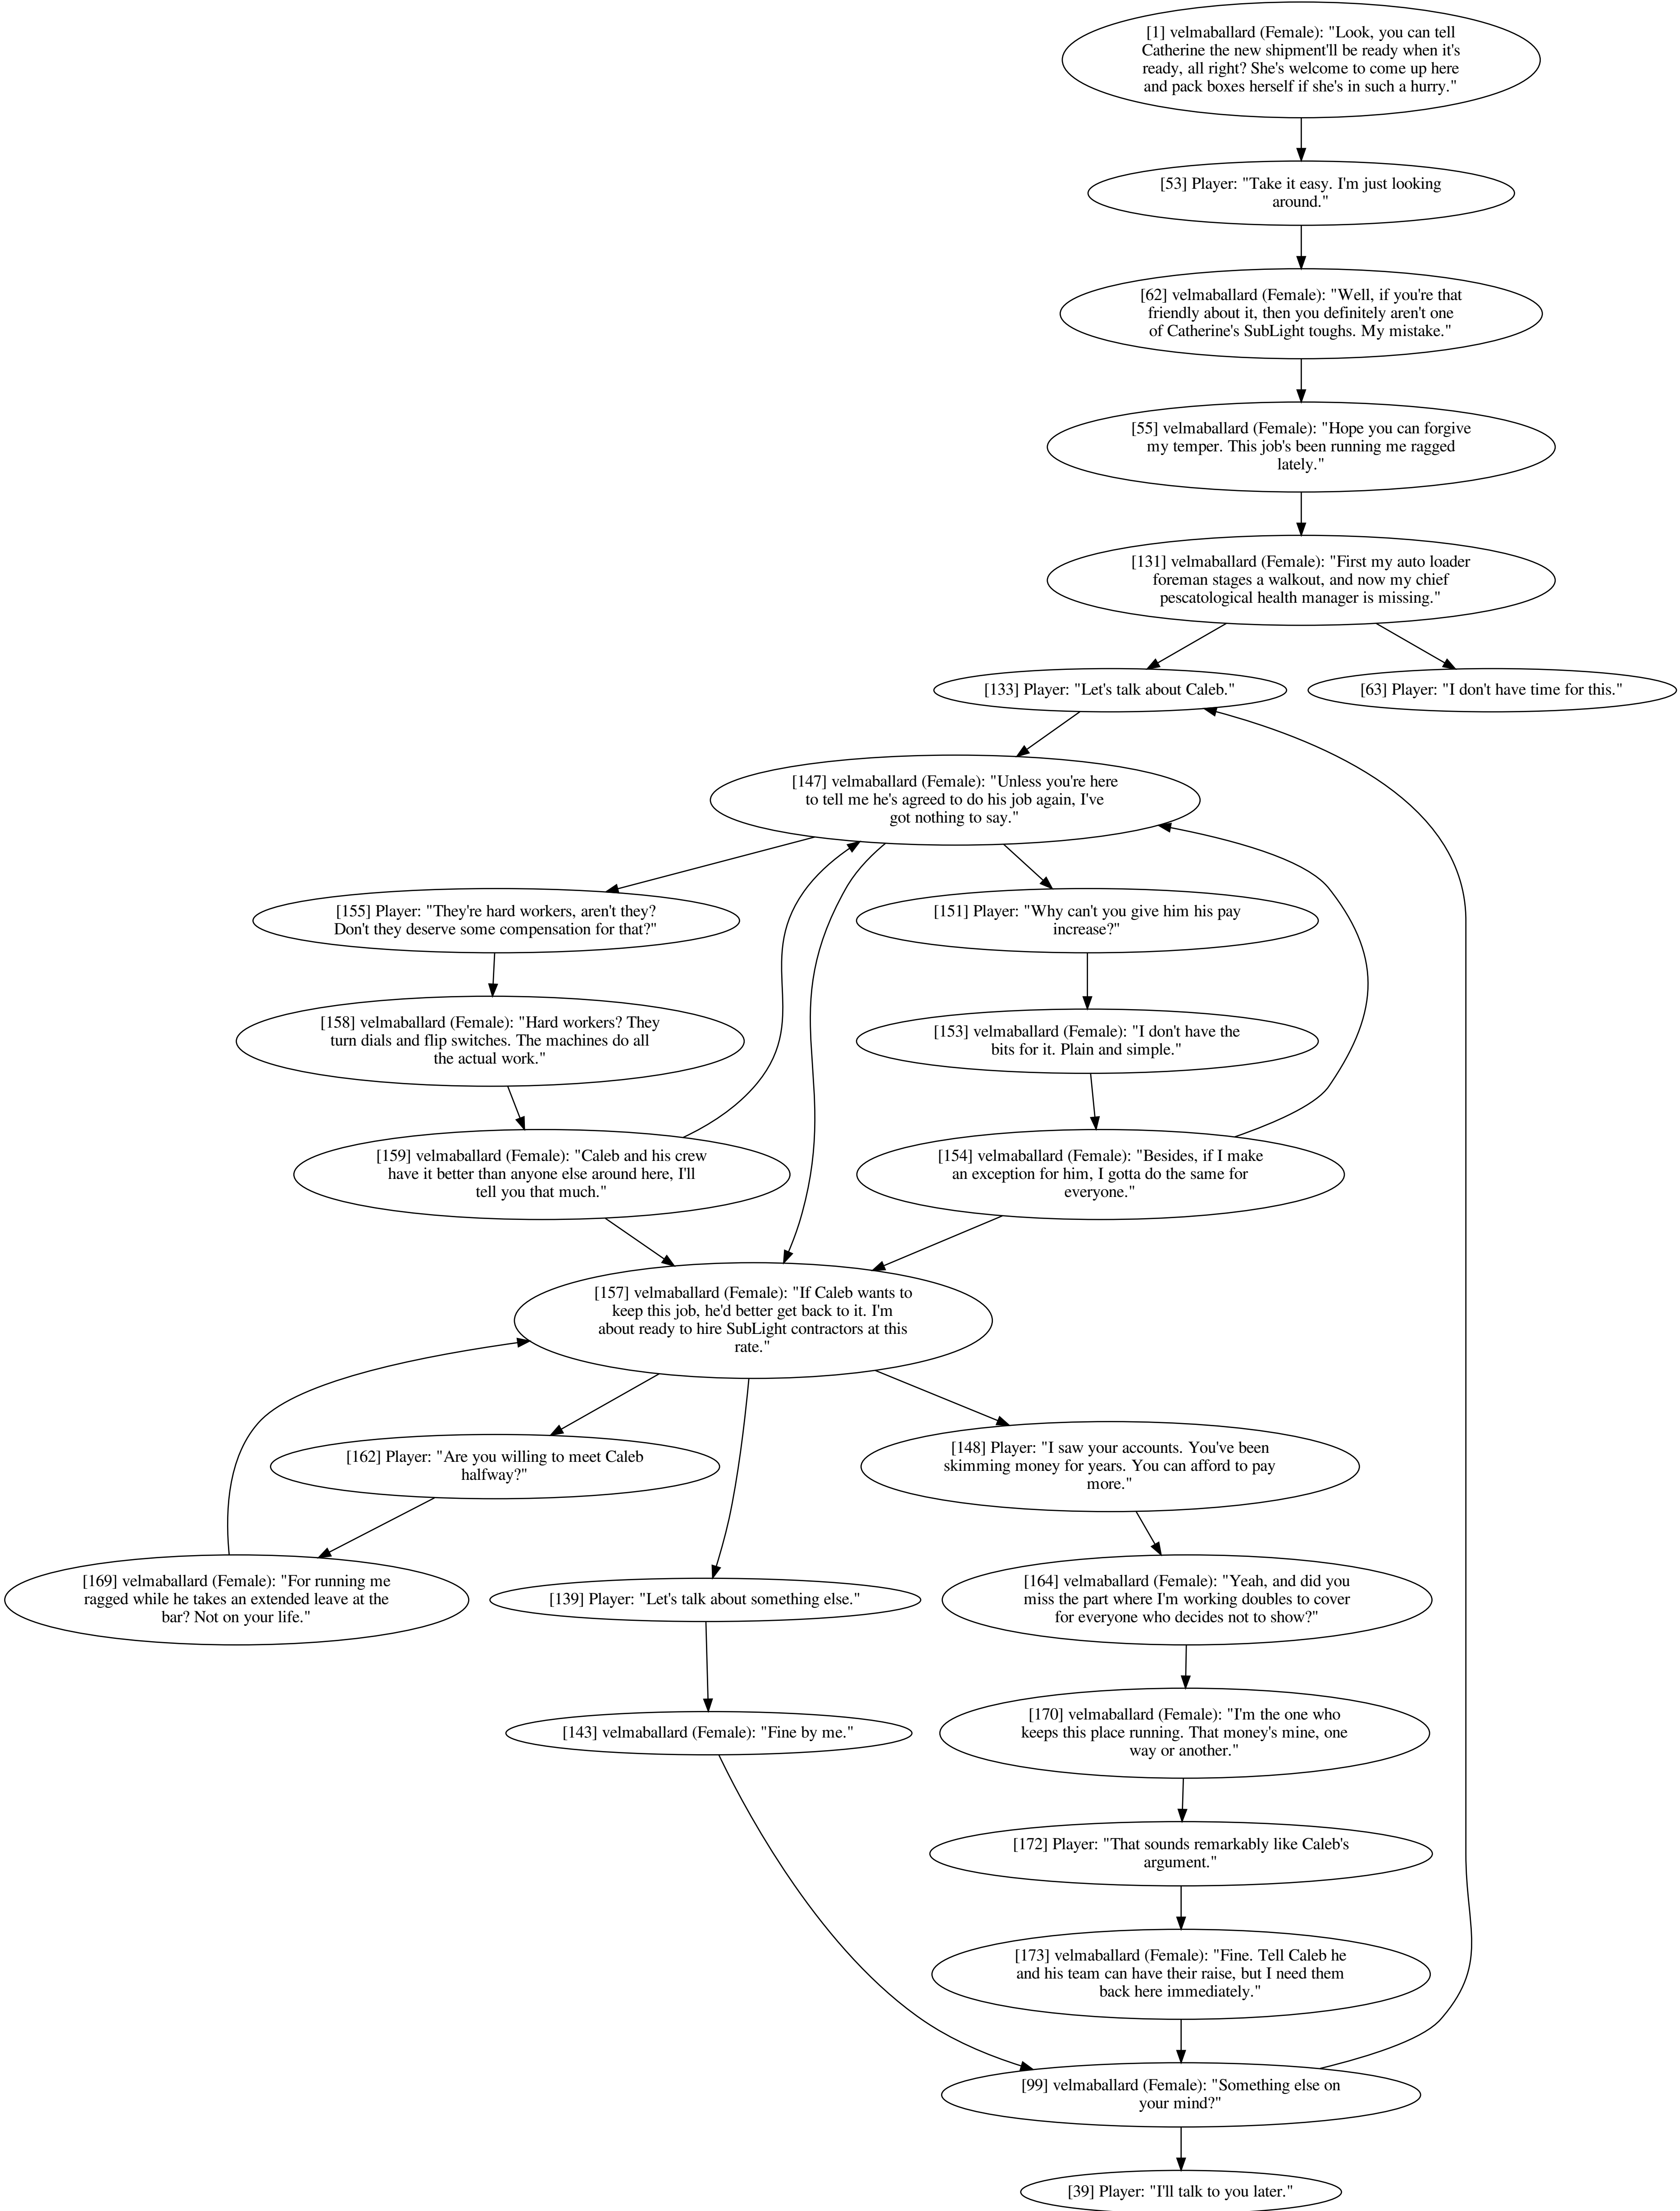

Supplement: software [file 2024.emnlp-main.520.software.zip]

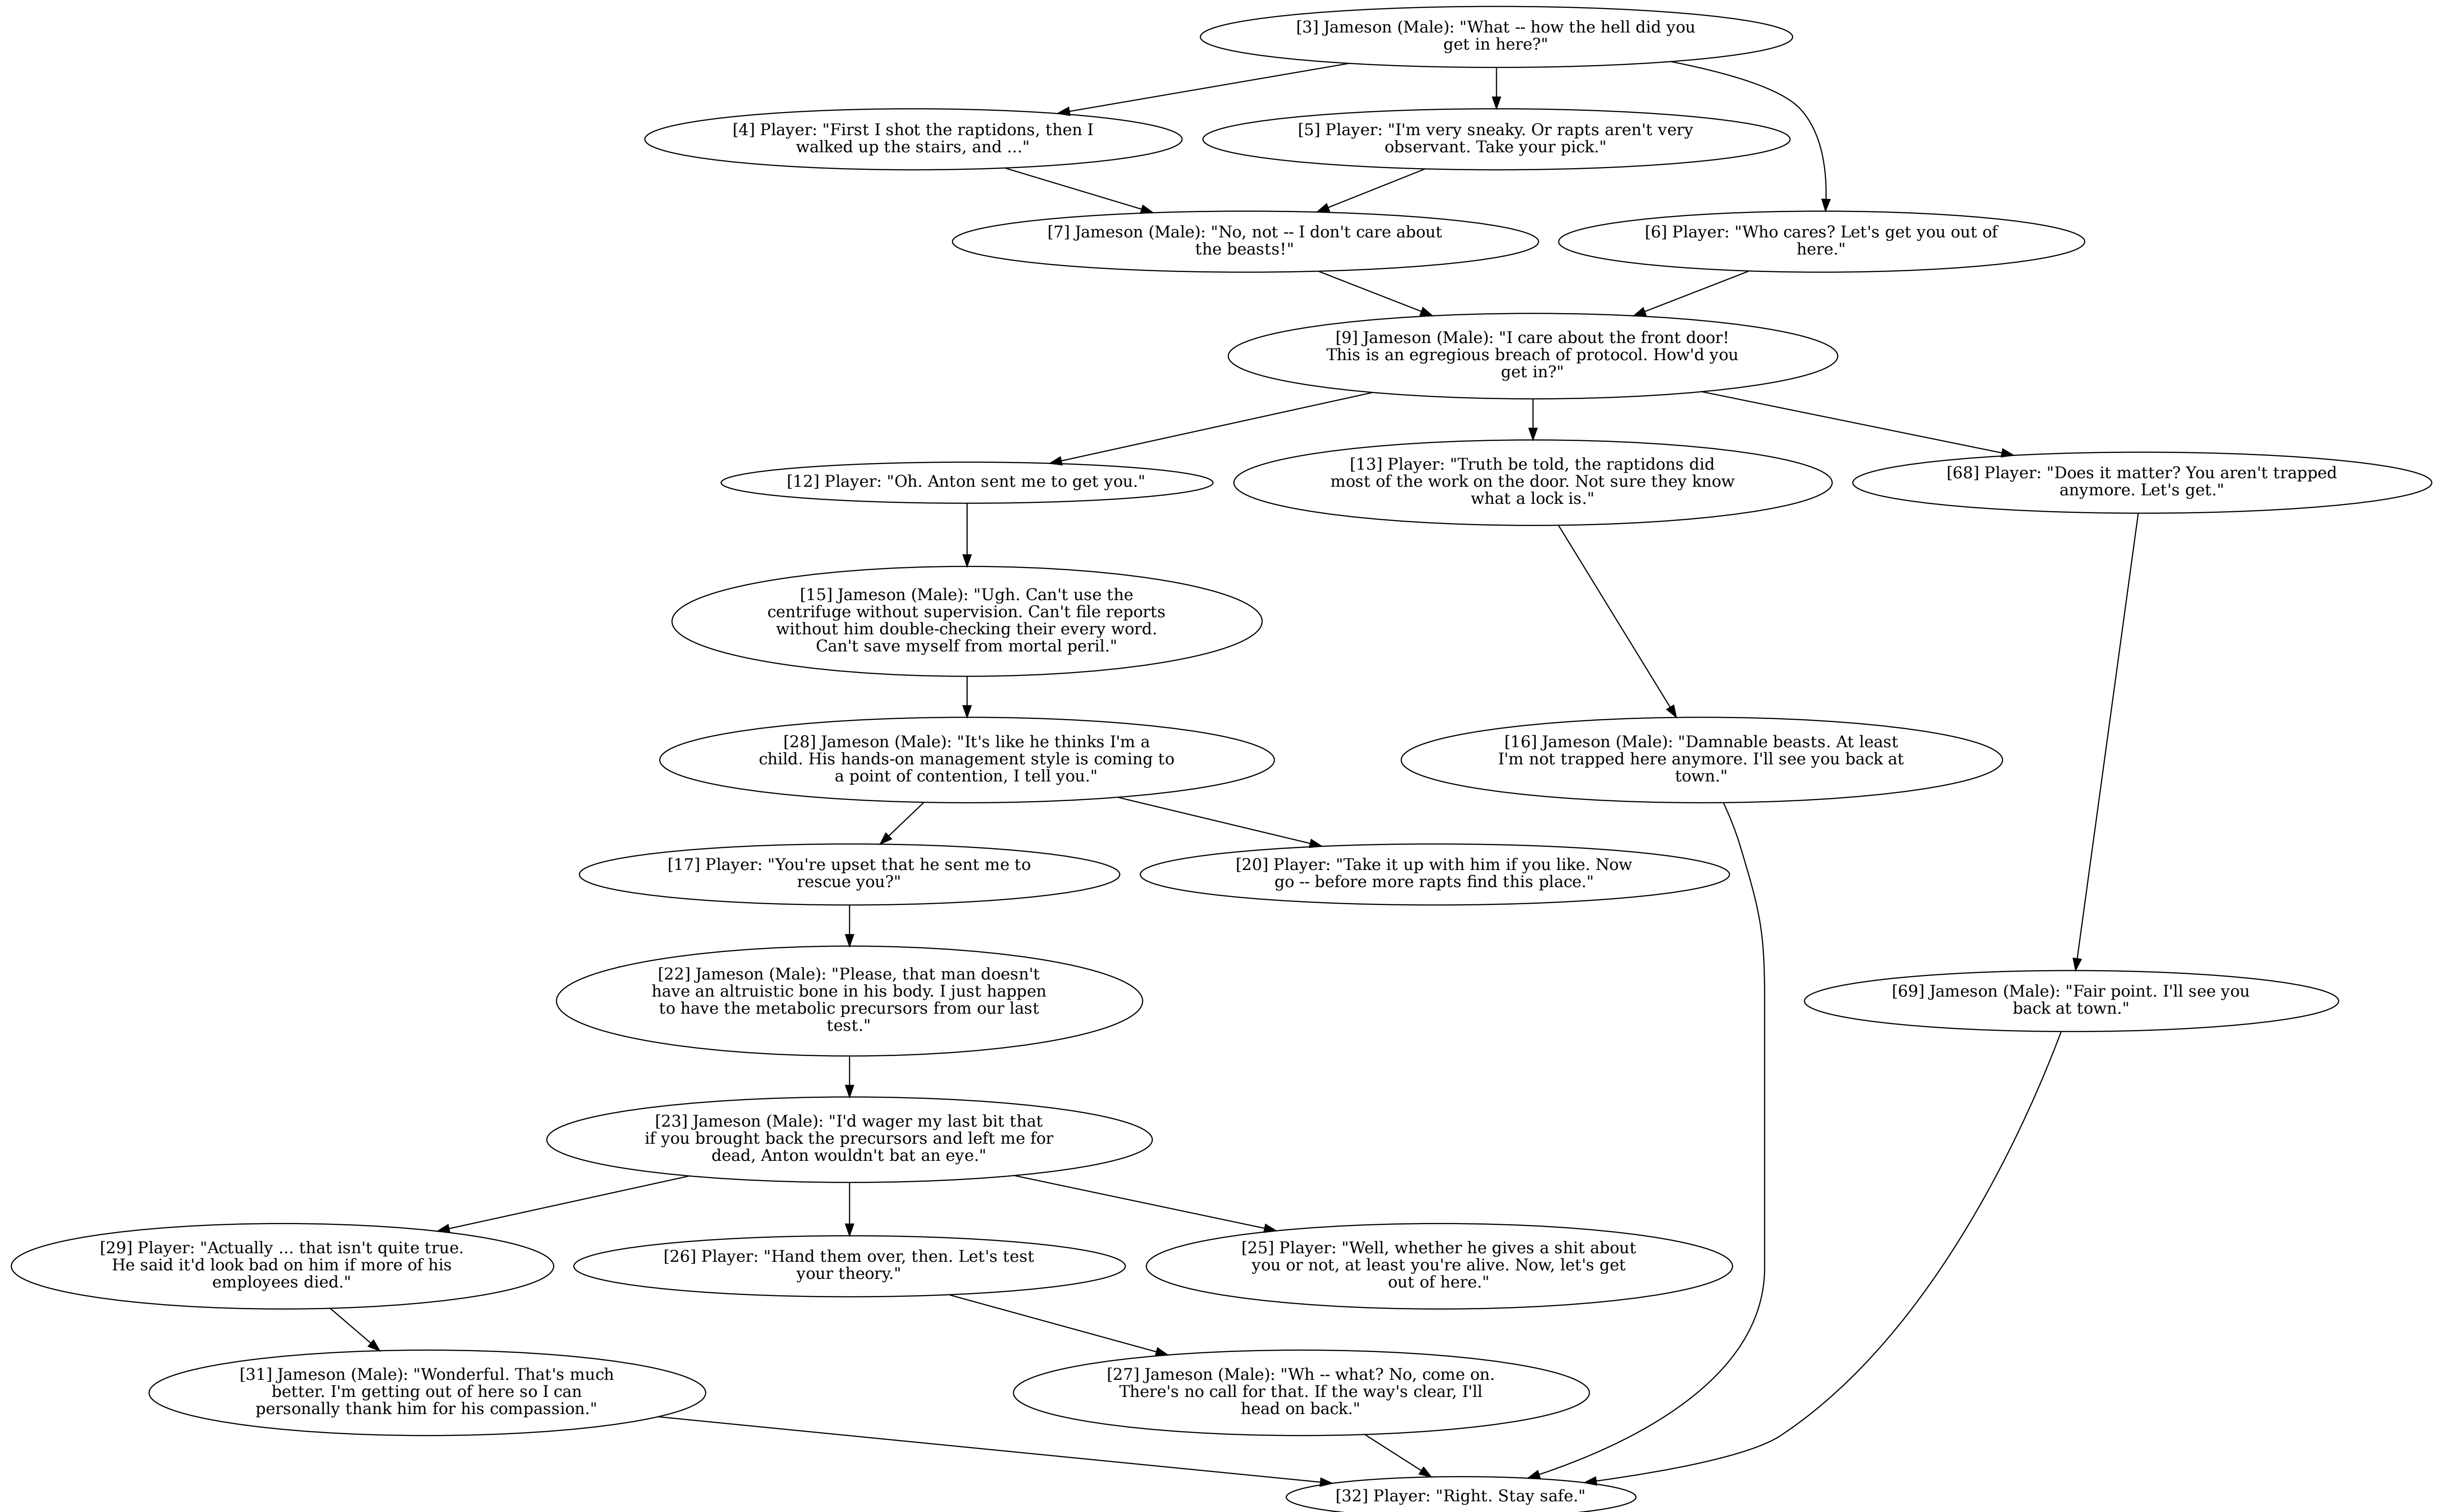

Supplement: software [file 2024.emnlp-main.520.software.zip]

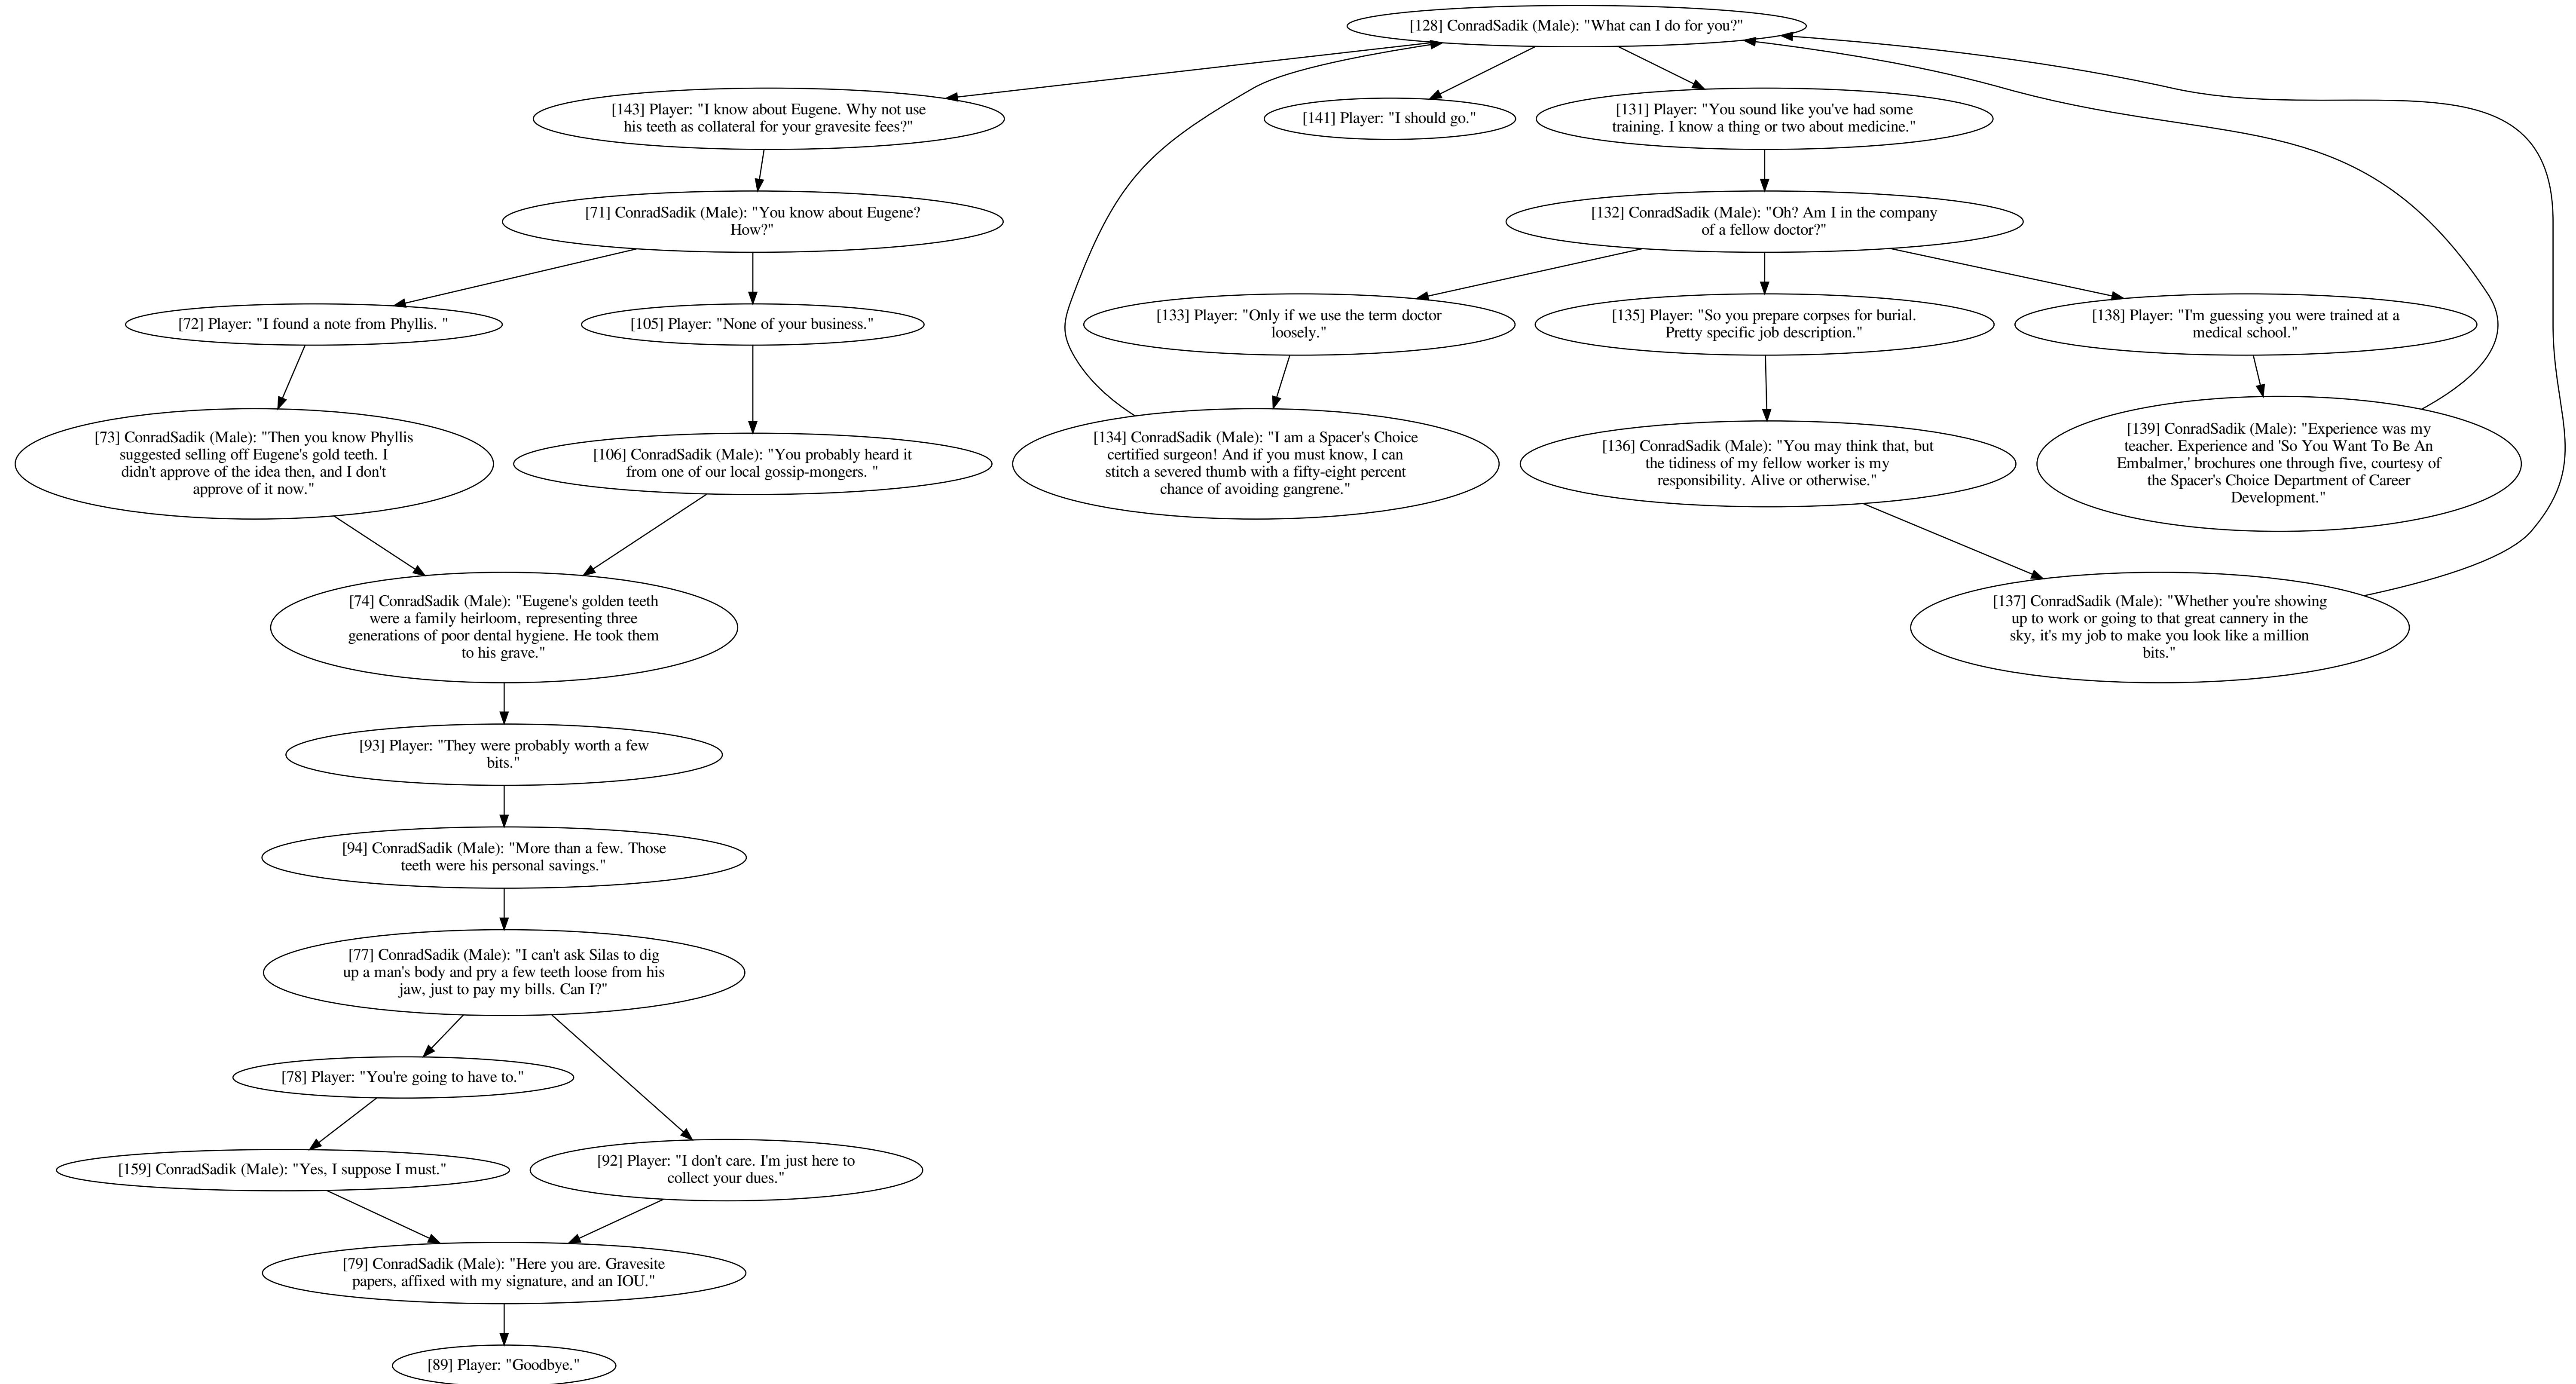

Supplement: software [file 2024.emnlp-main.520.software.zip]

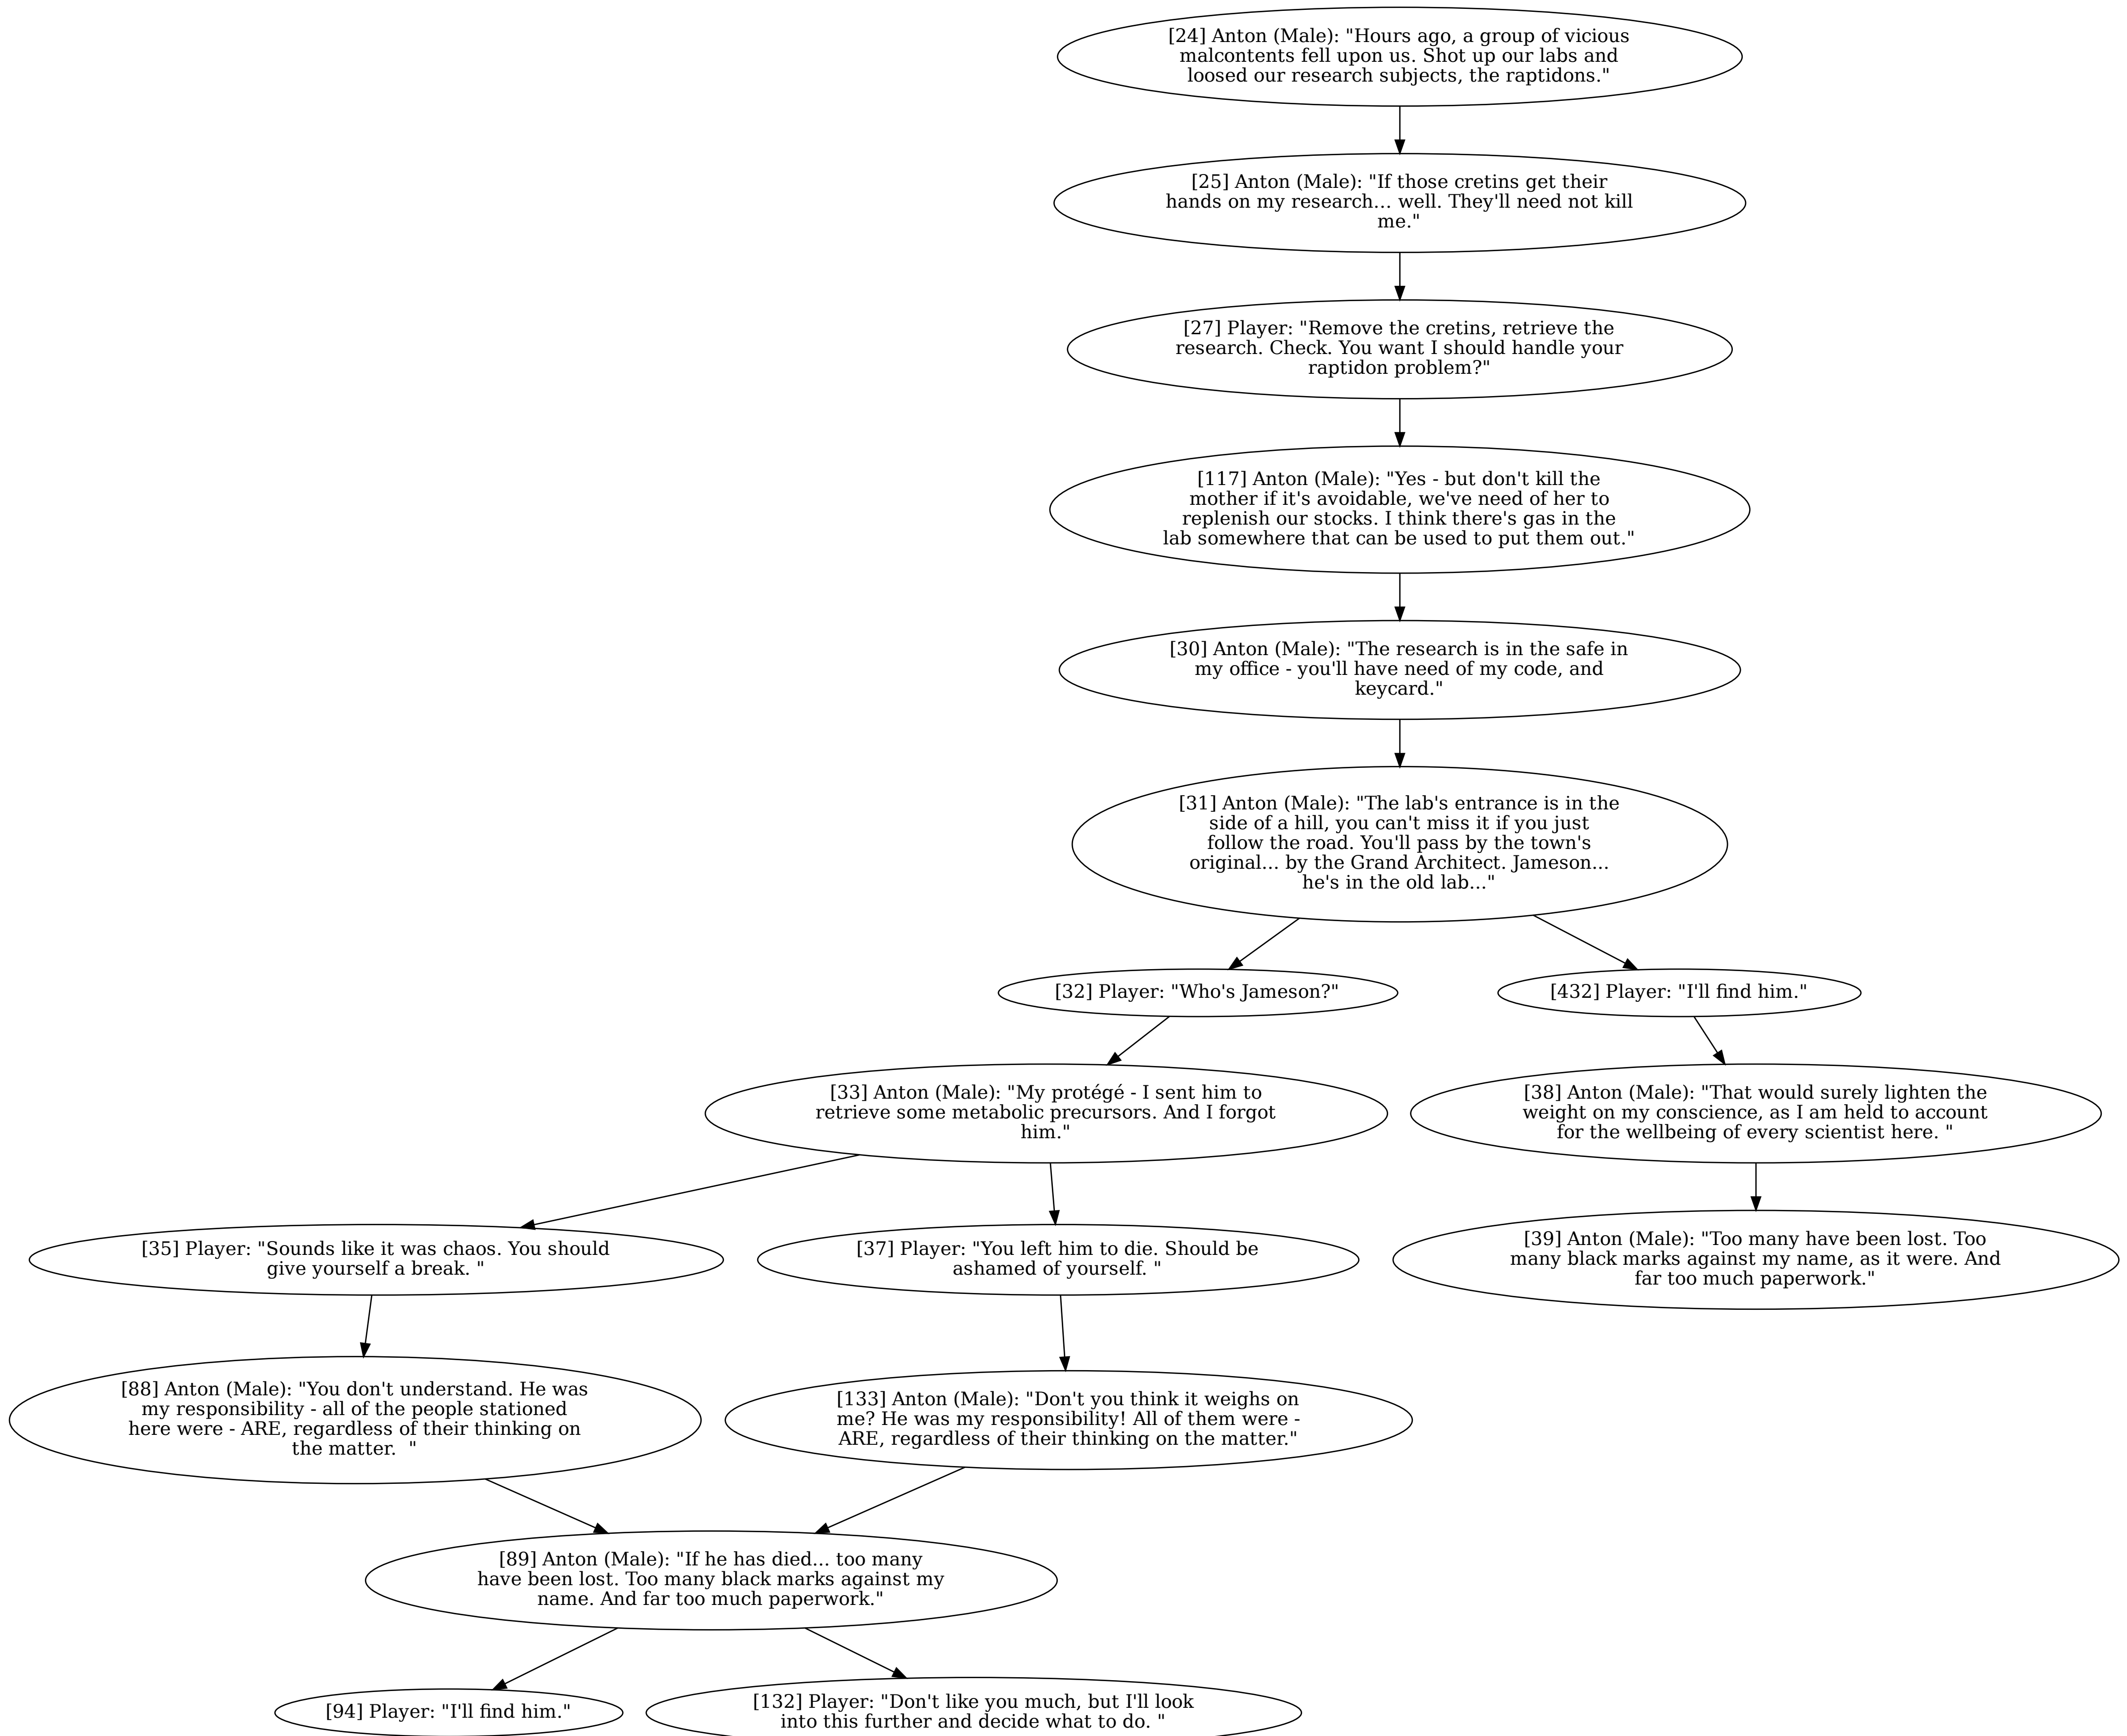

Supplement: software [file 2024.emnlp-main.520.software.zip]

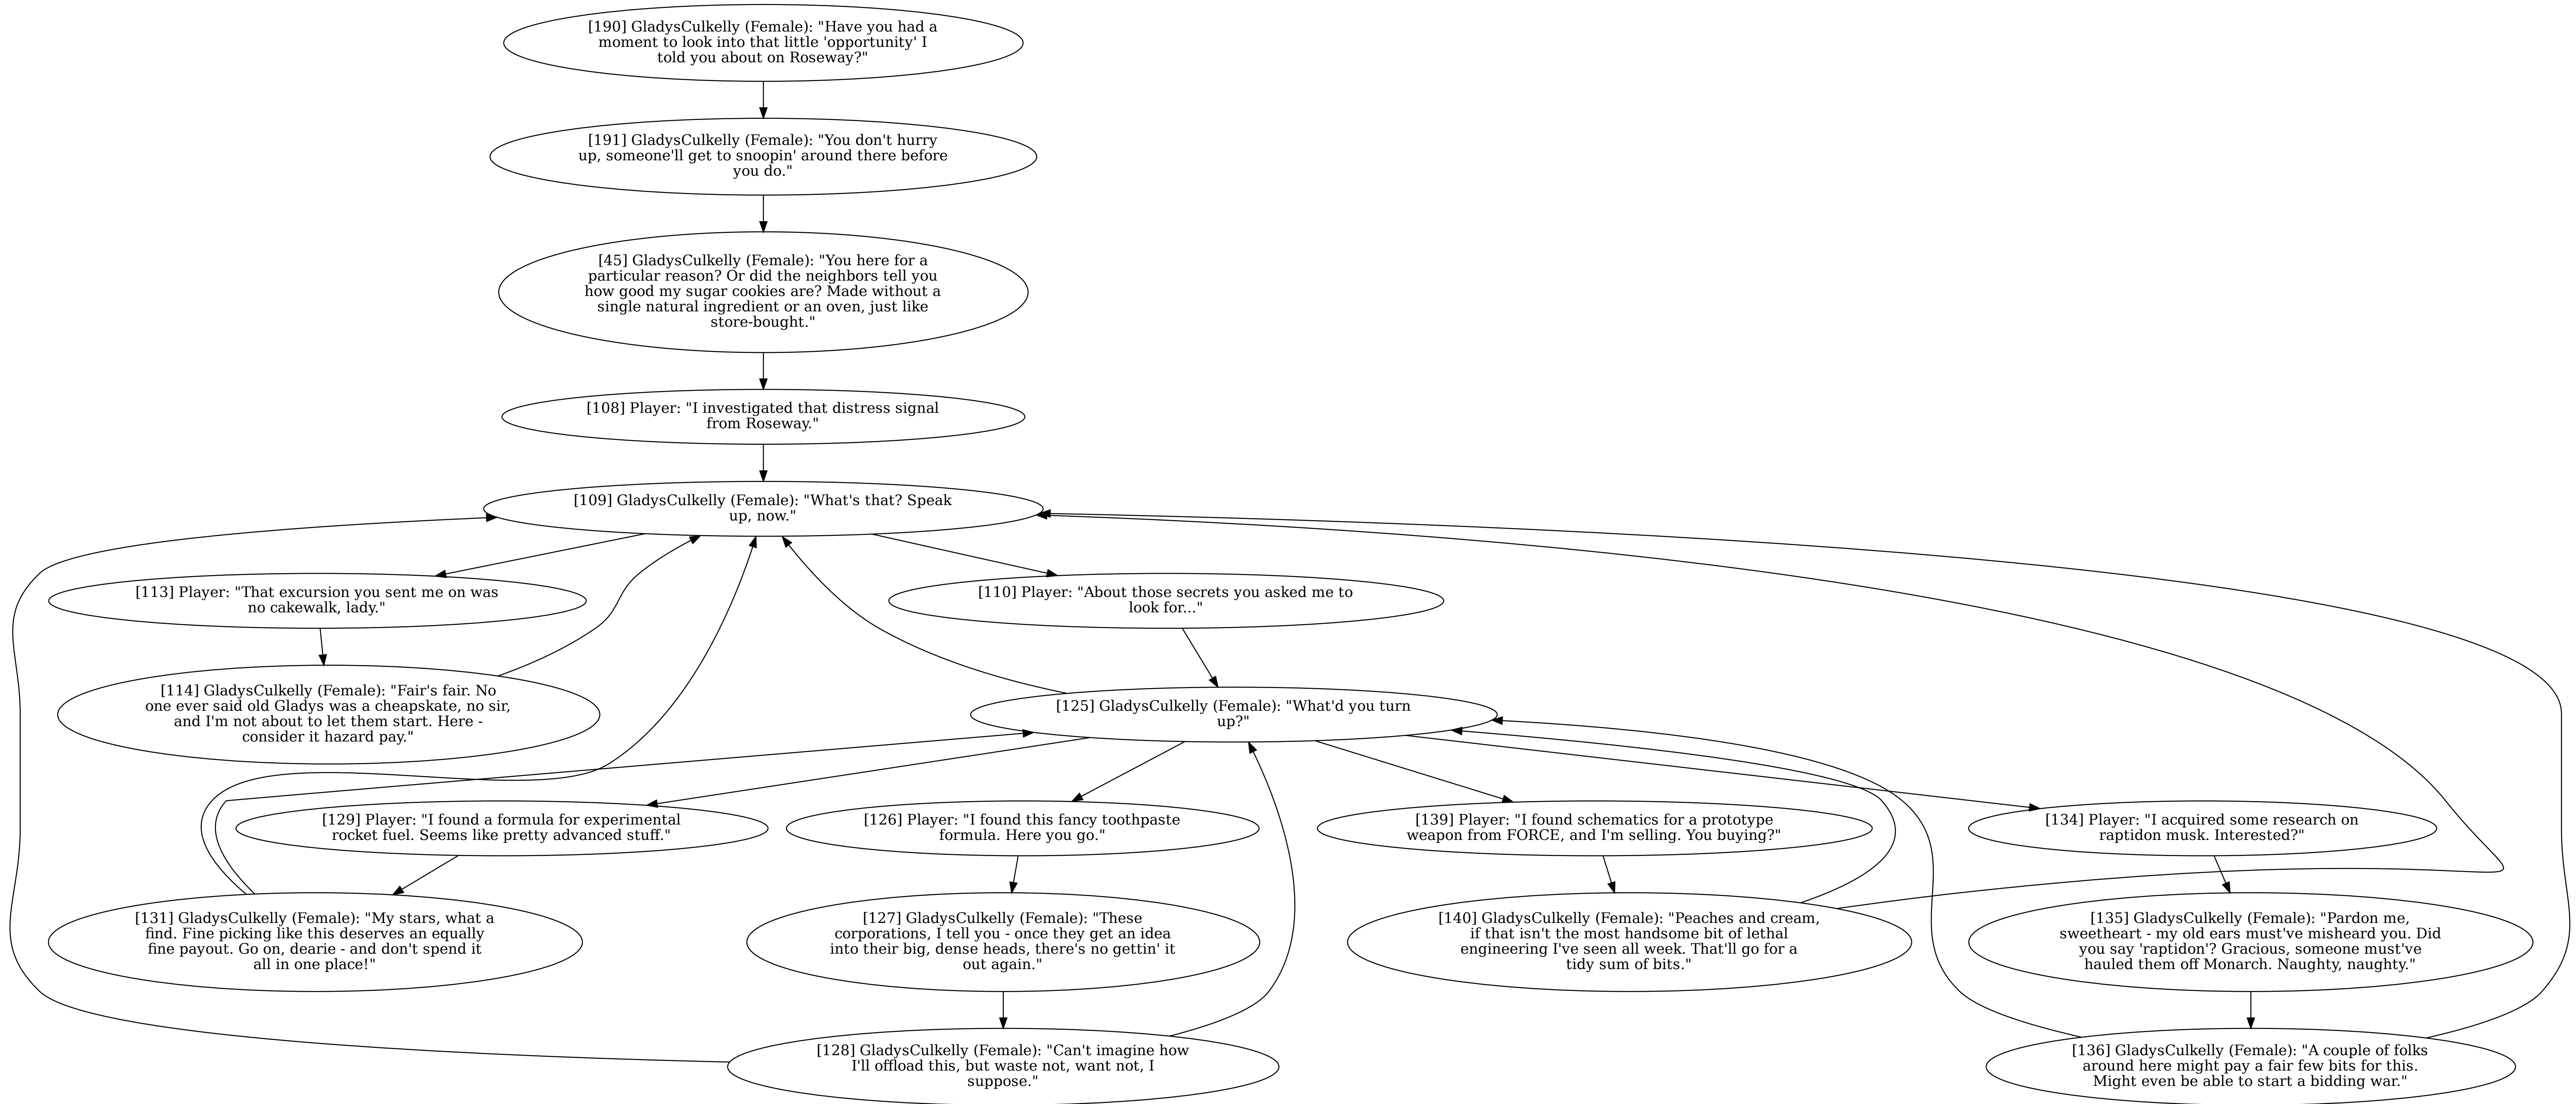

Supplement: software [file 2024.emnlp-main.520.software.zip]

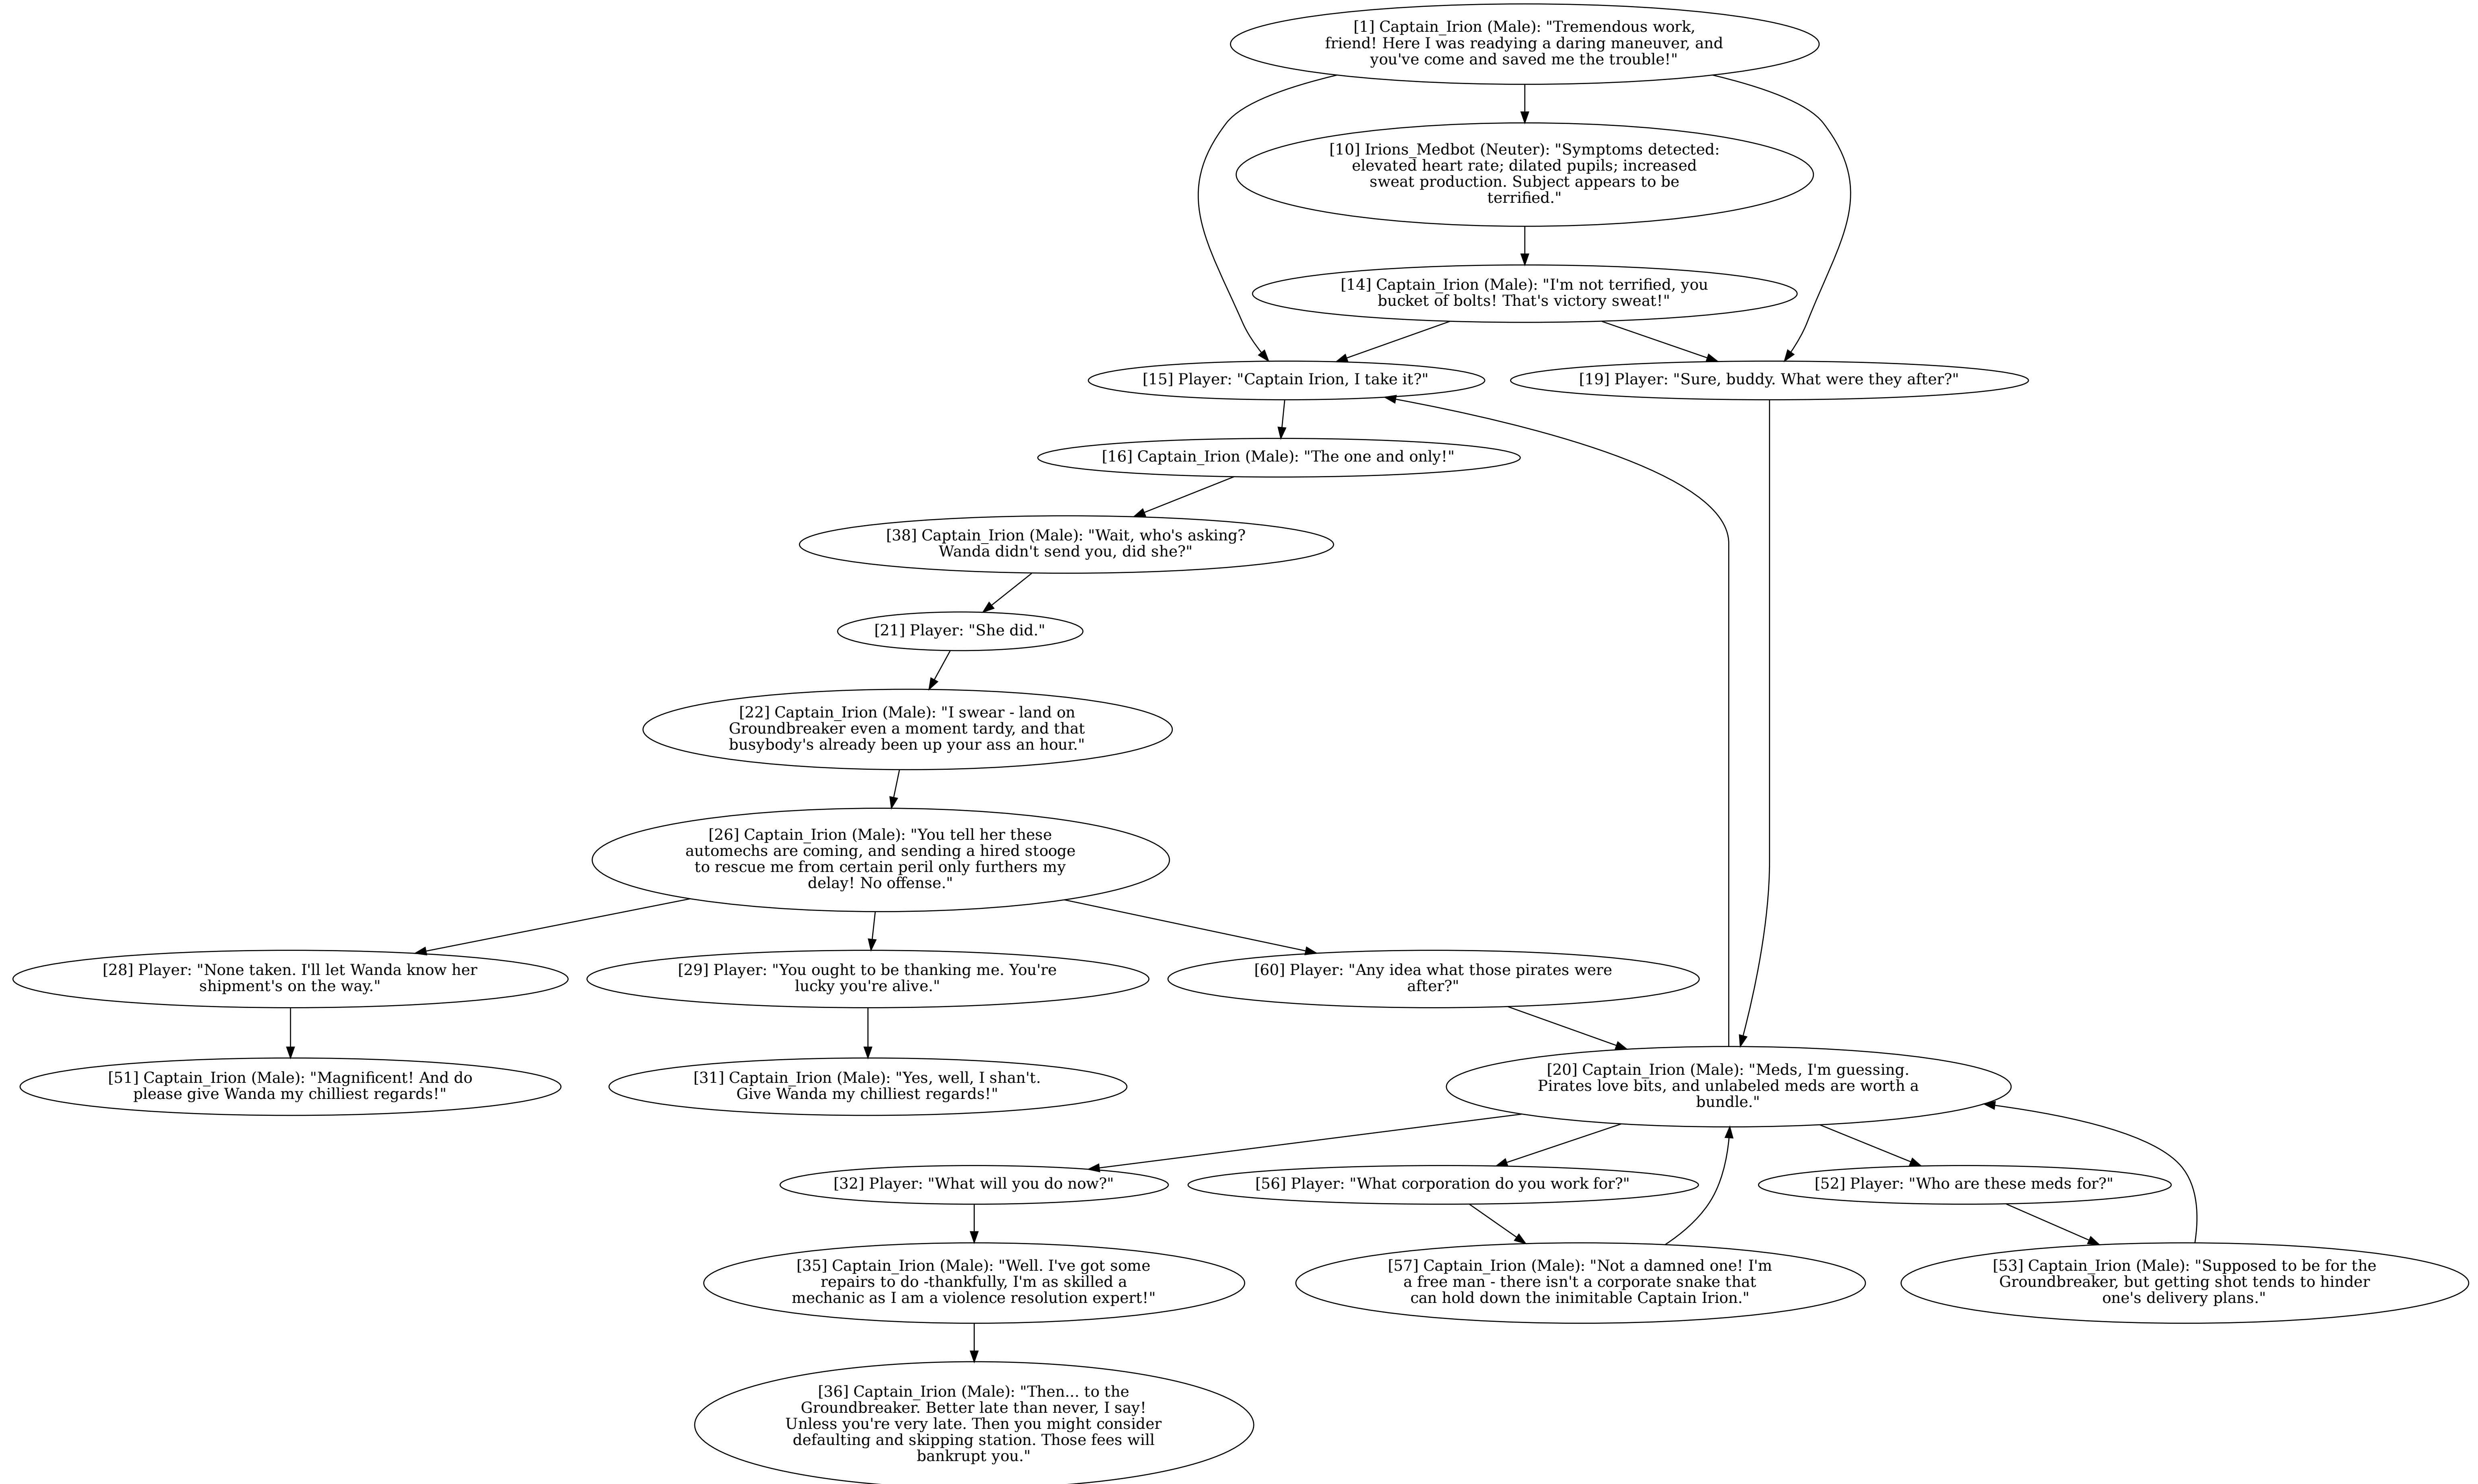

Supplement: software [file 2024.emnlp-main.520.software.zip]

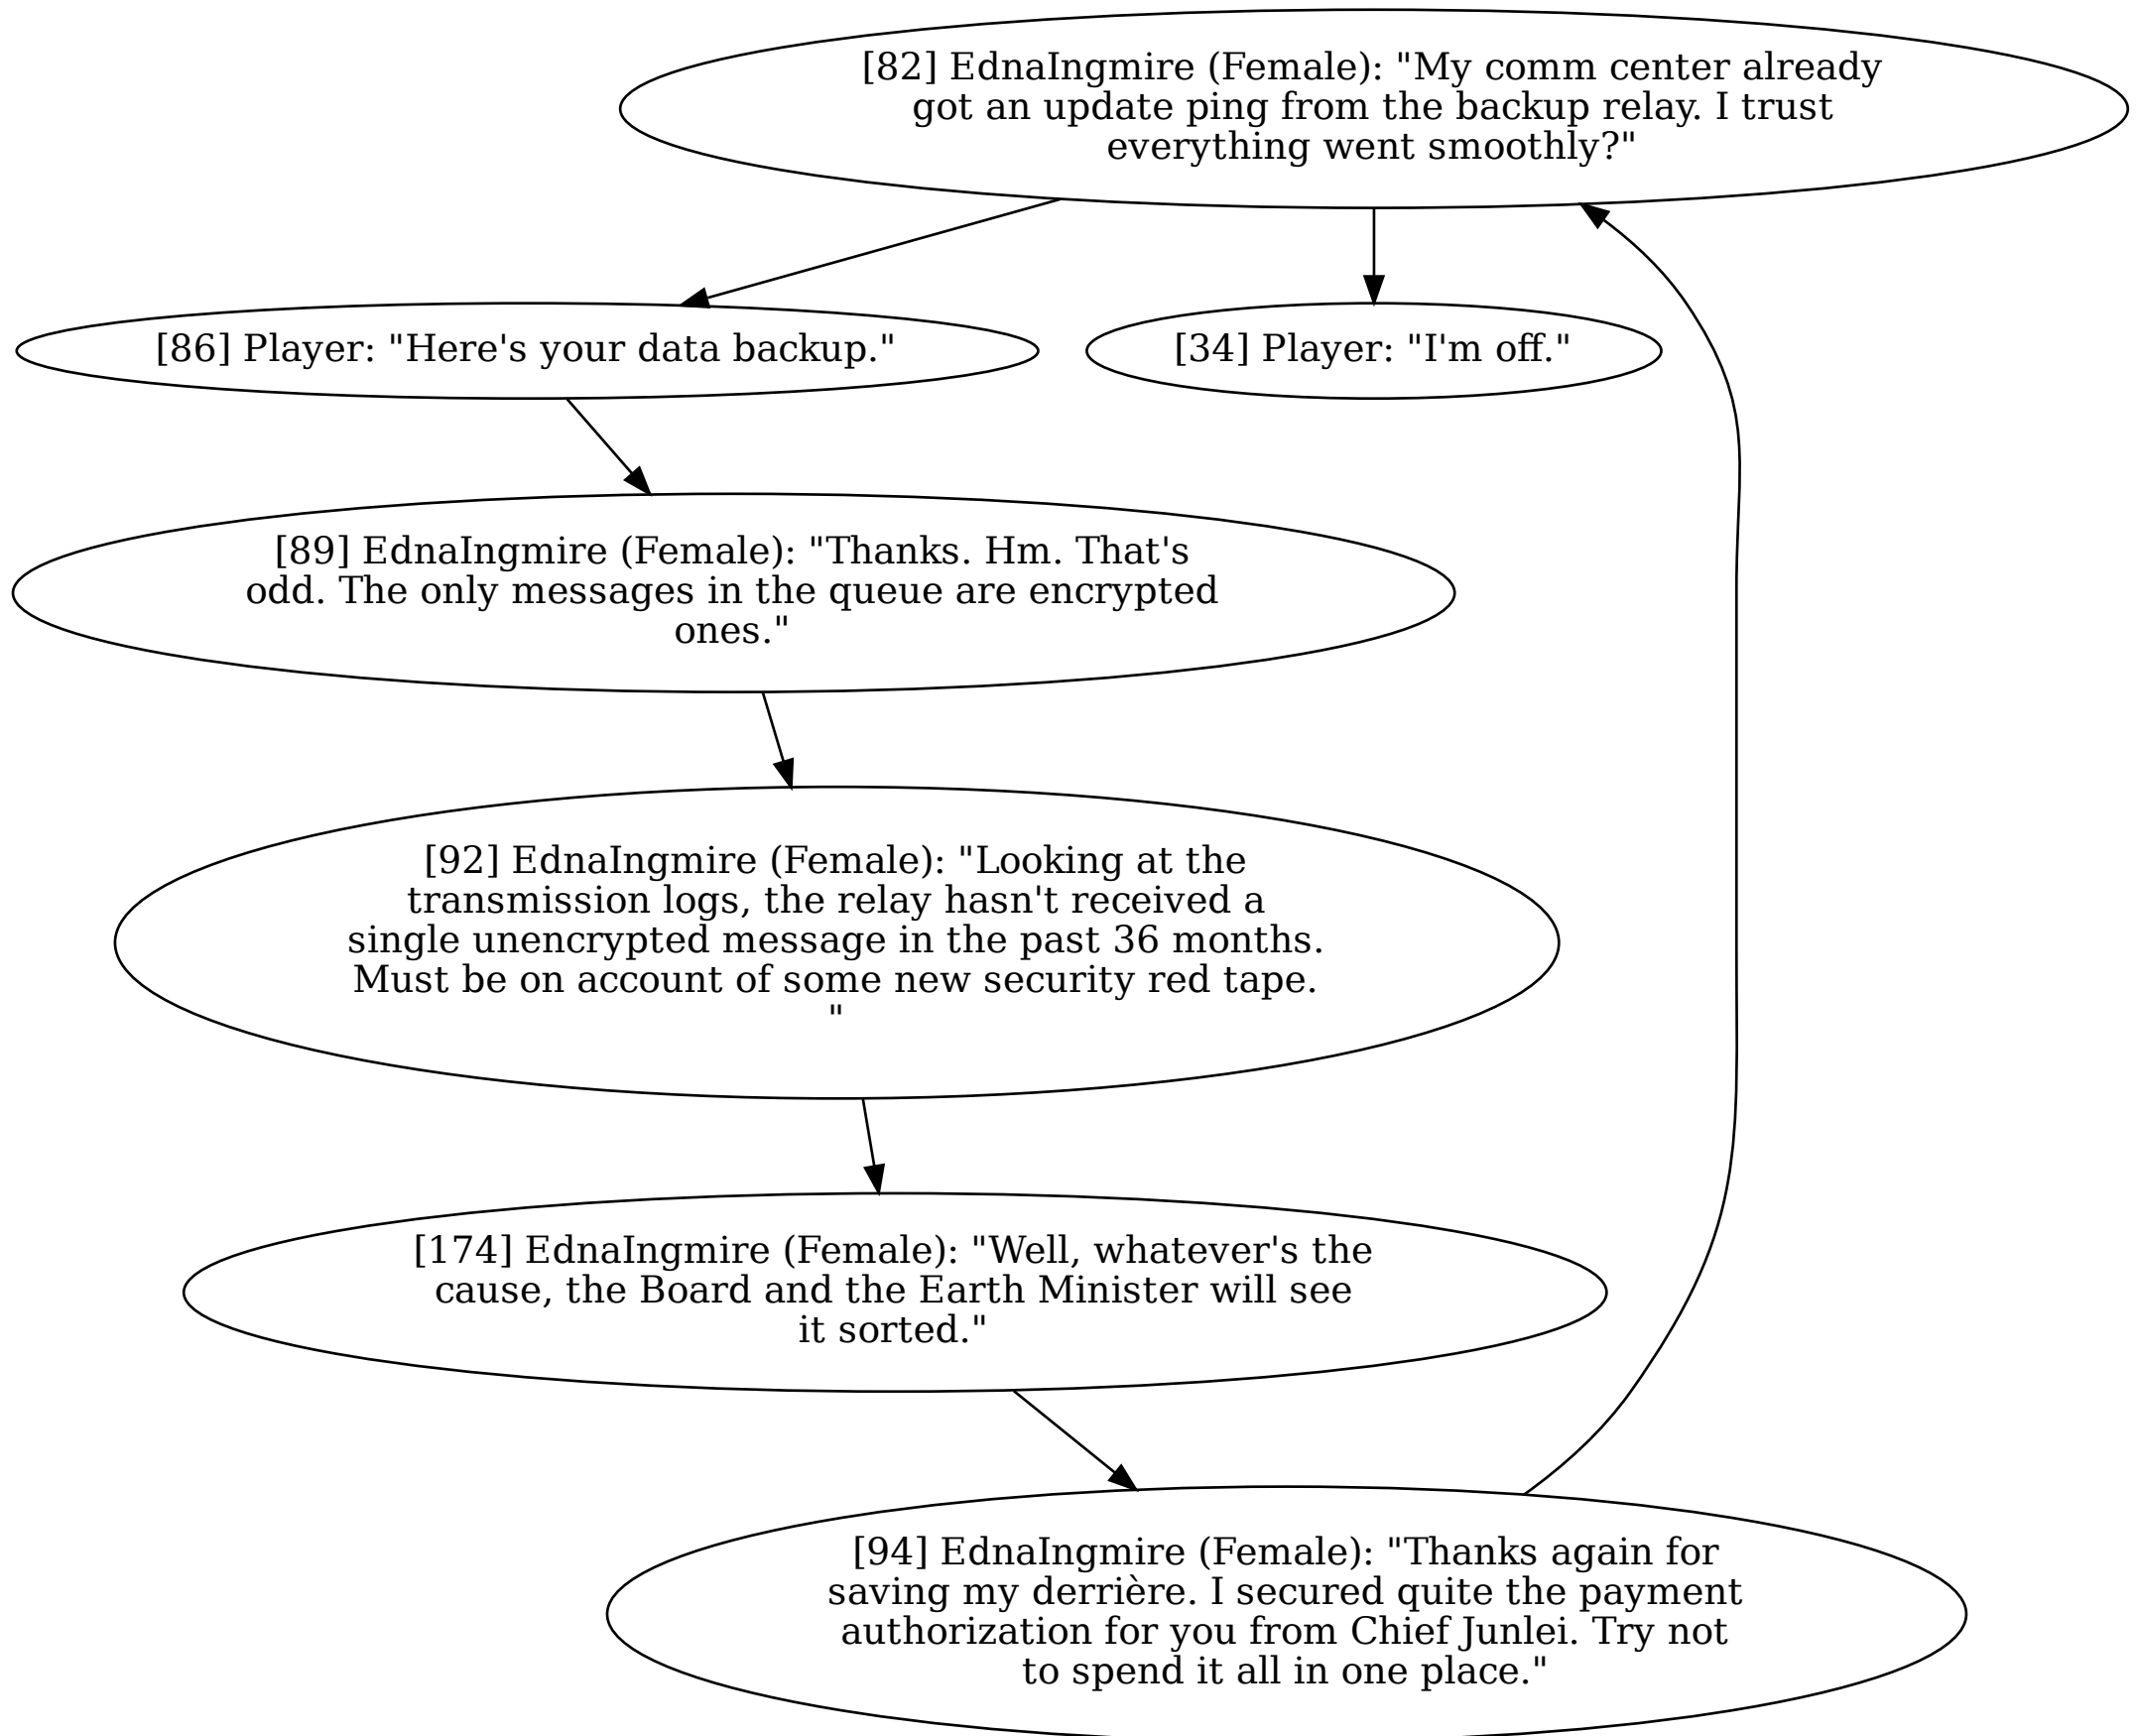

Supplement: software [file 2024.emnlp-main.520.software.zip]

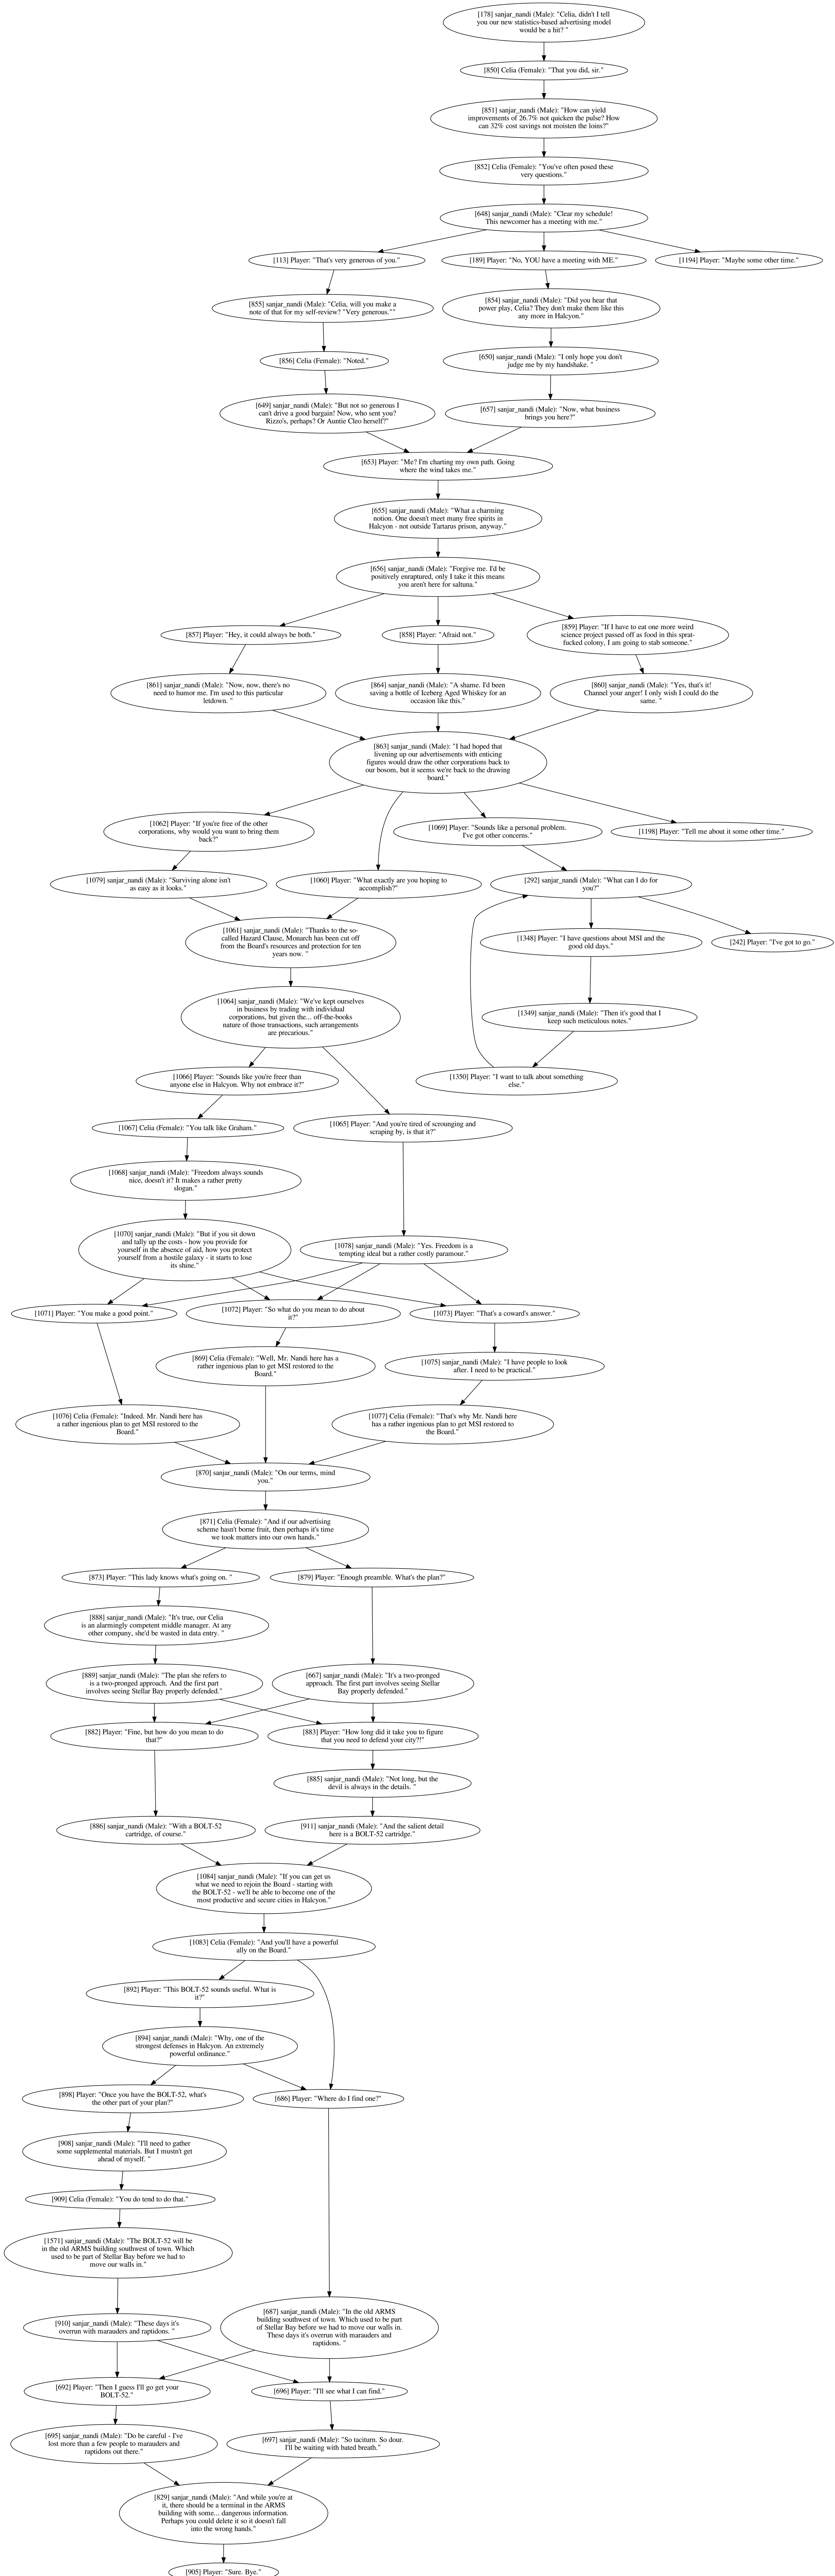

Supplement: software [file 2024.emnlp-main.520.software.zip]

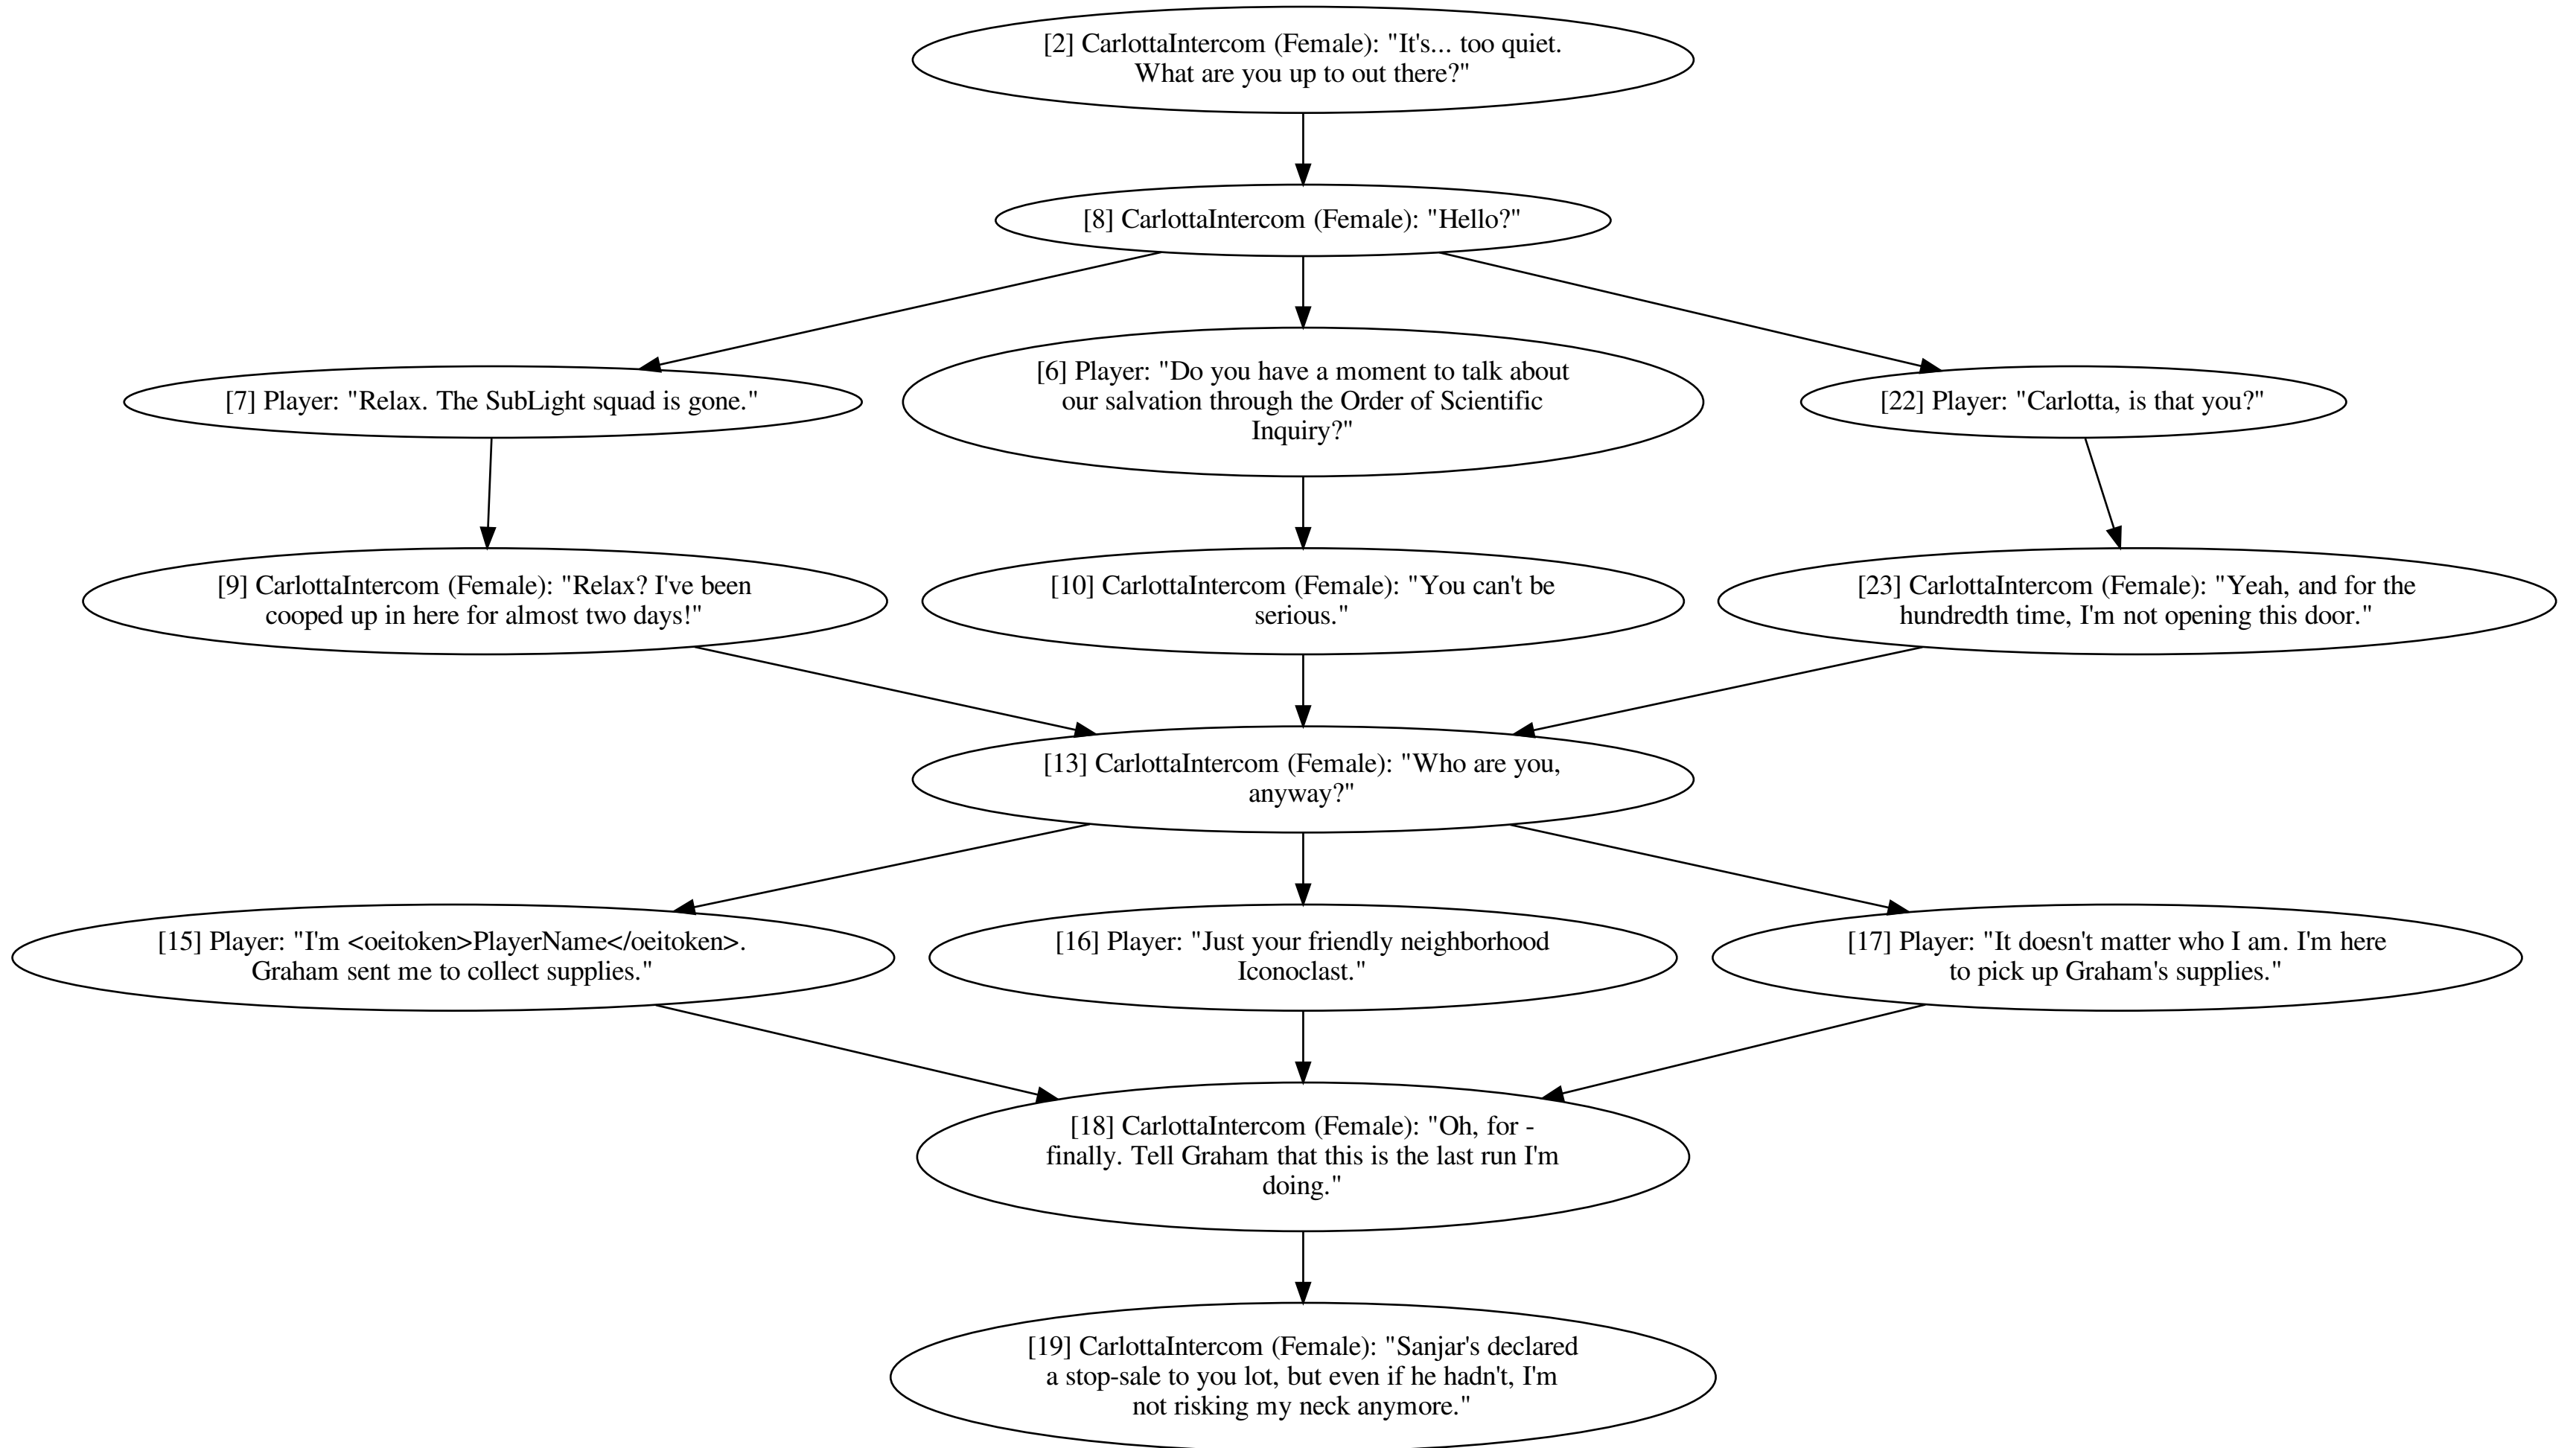

Supplement: software [file 2024.emnlp-main.520.software.zip]

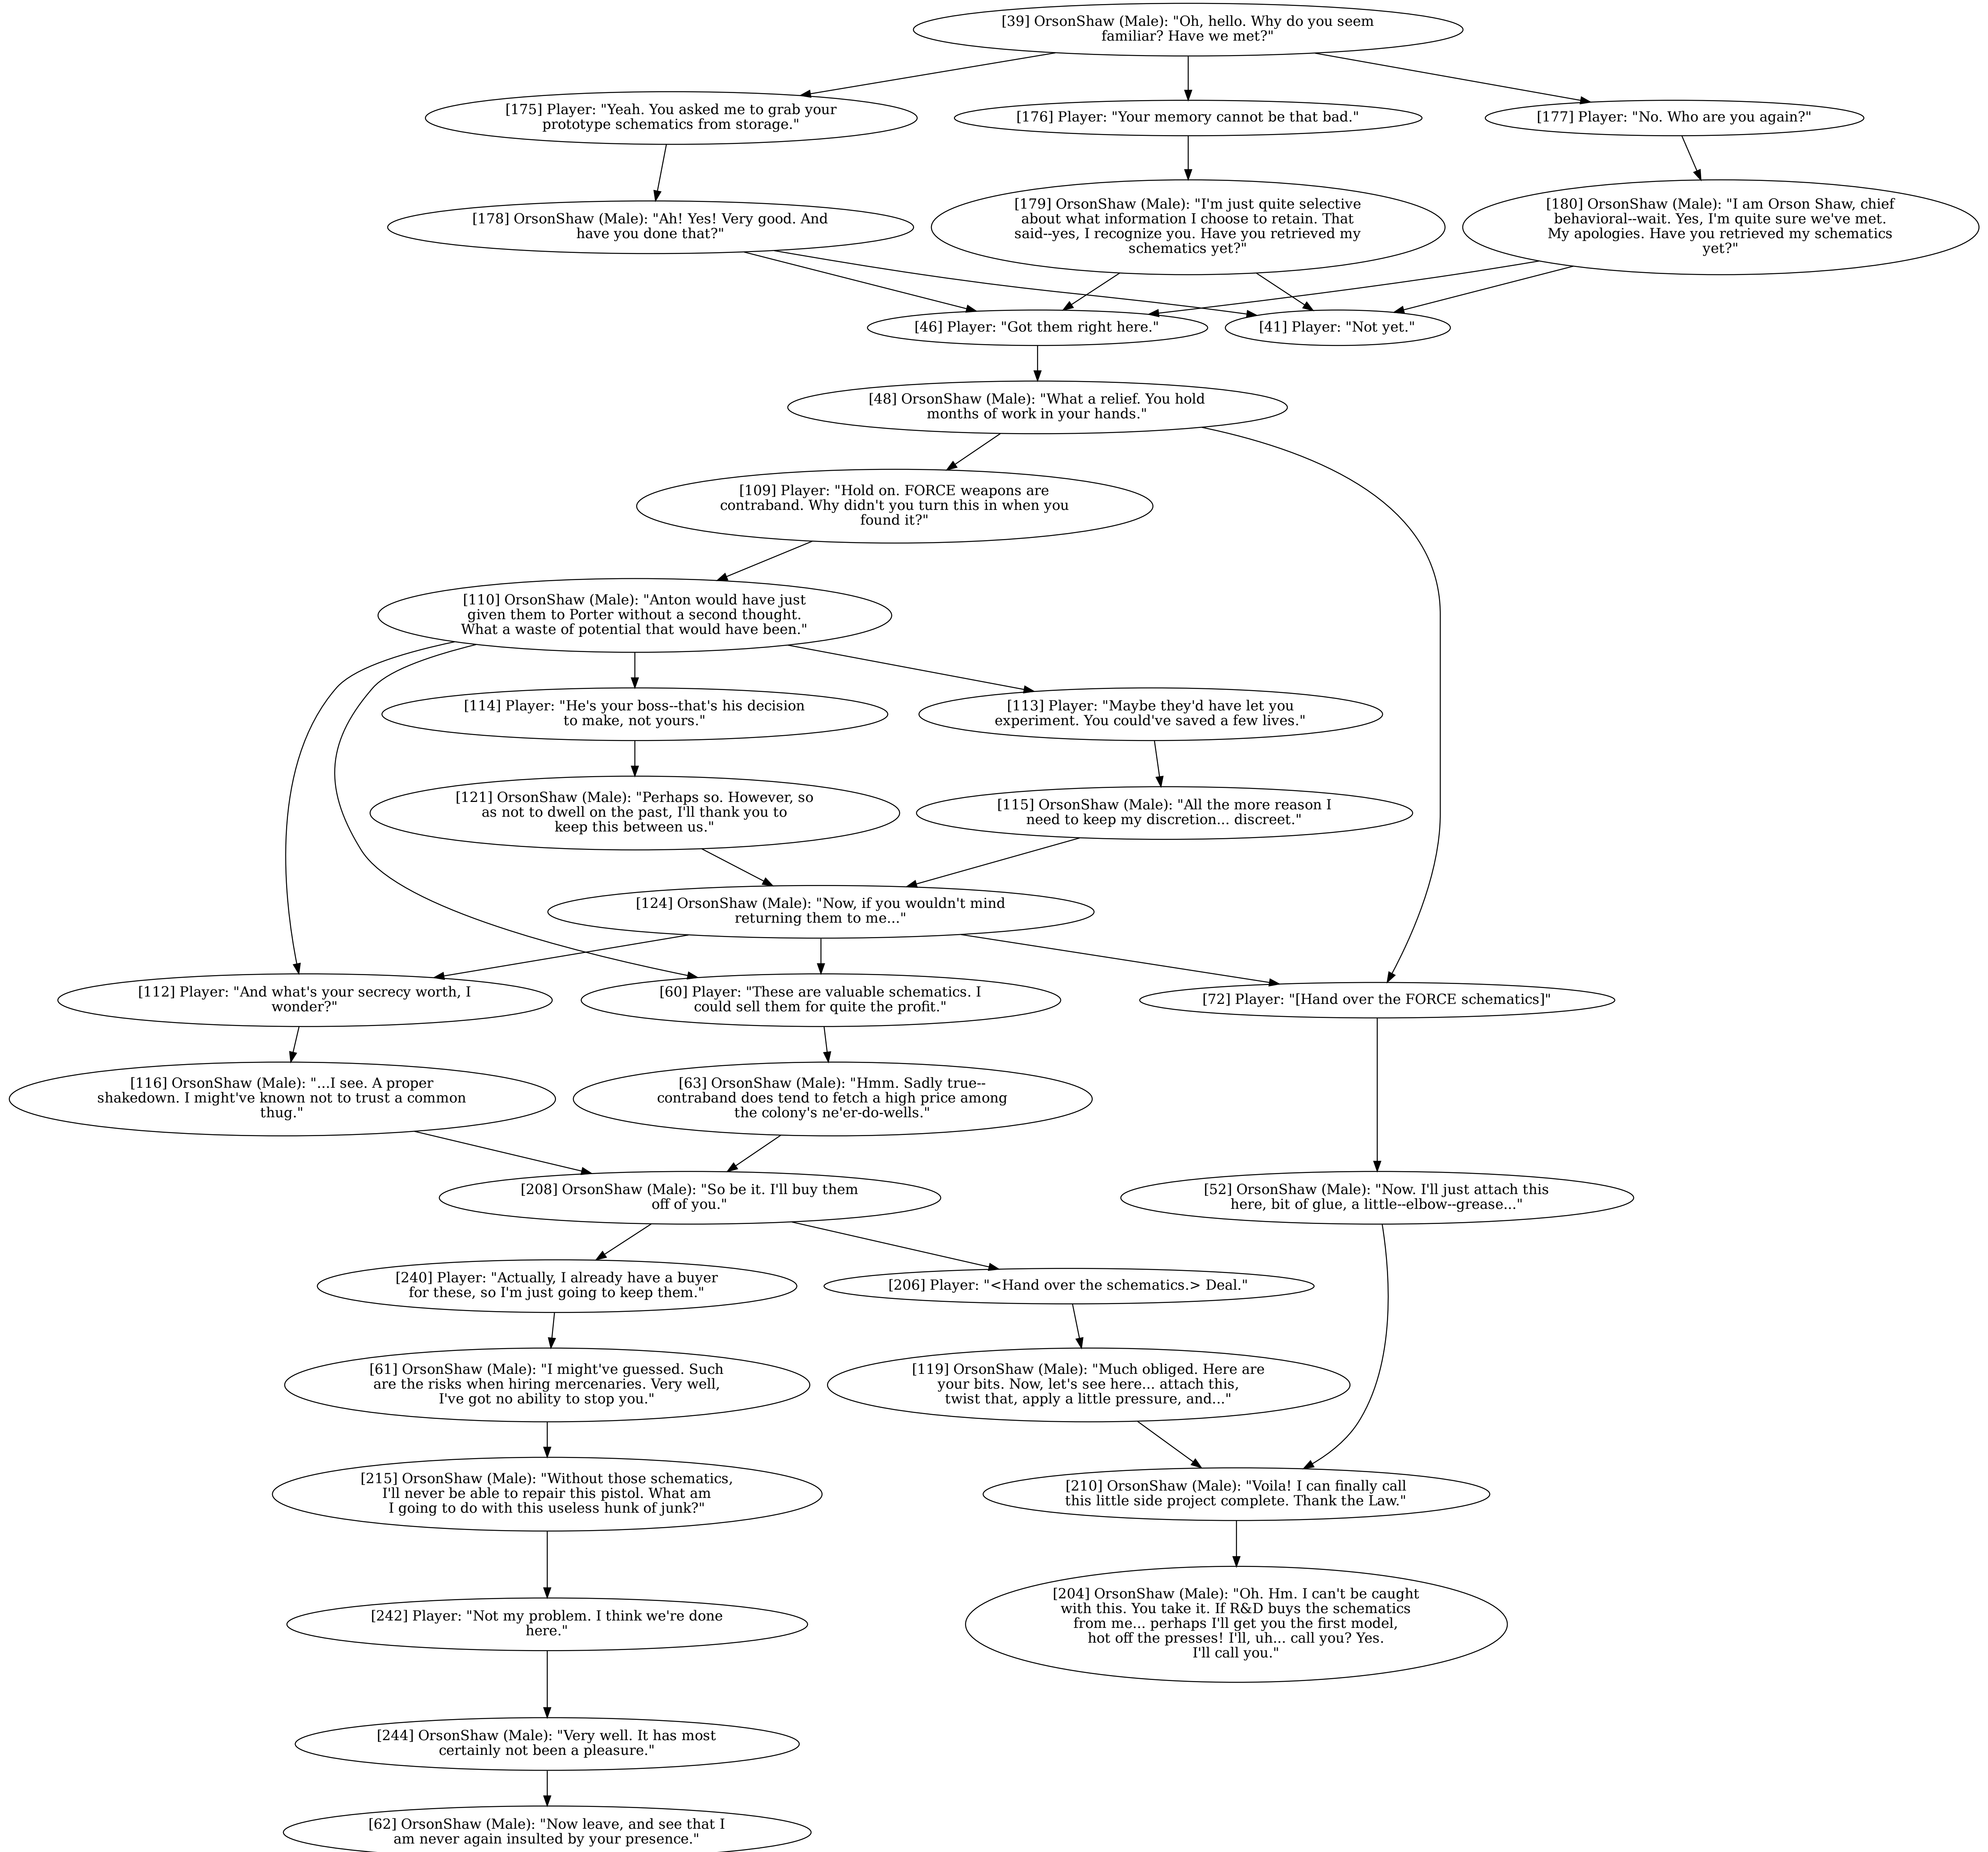

Supplement: software [file 2024.emnlp-main.520.software.zip]

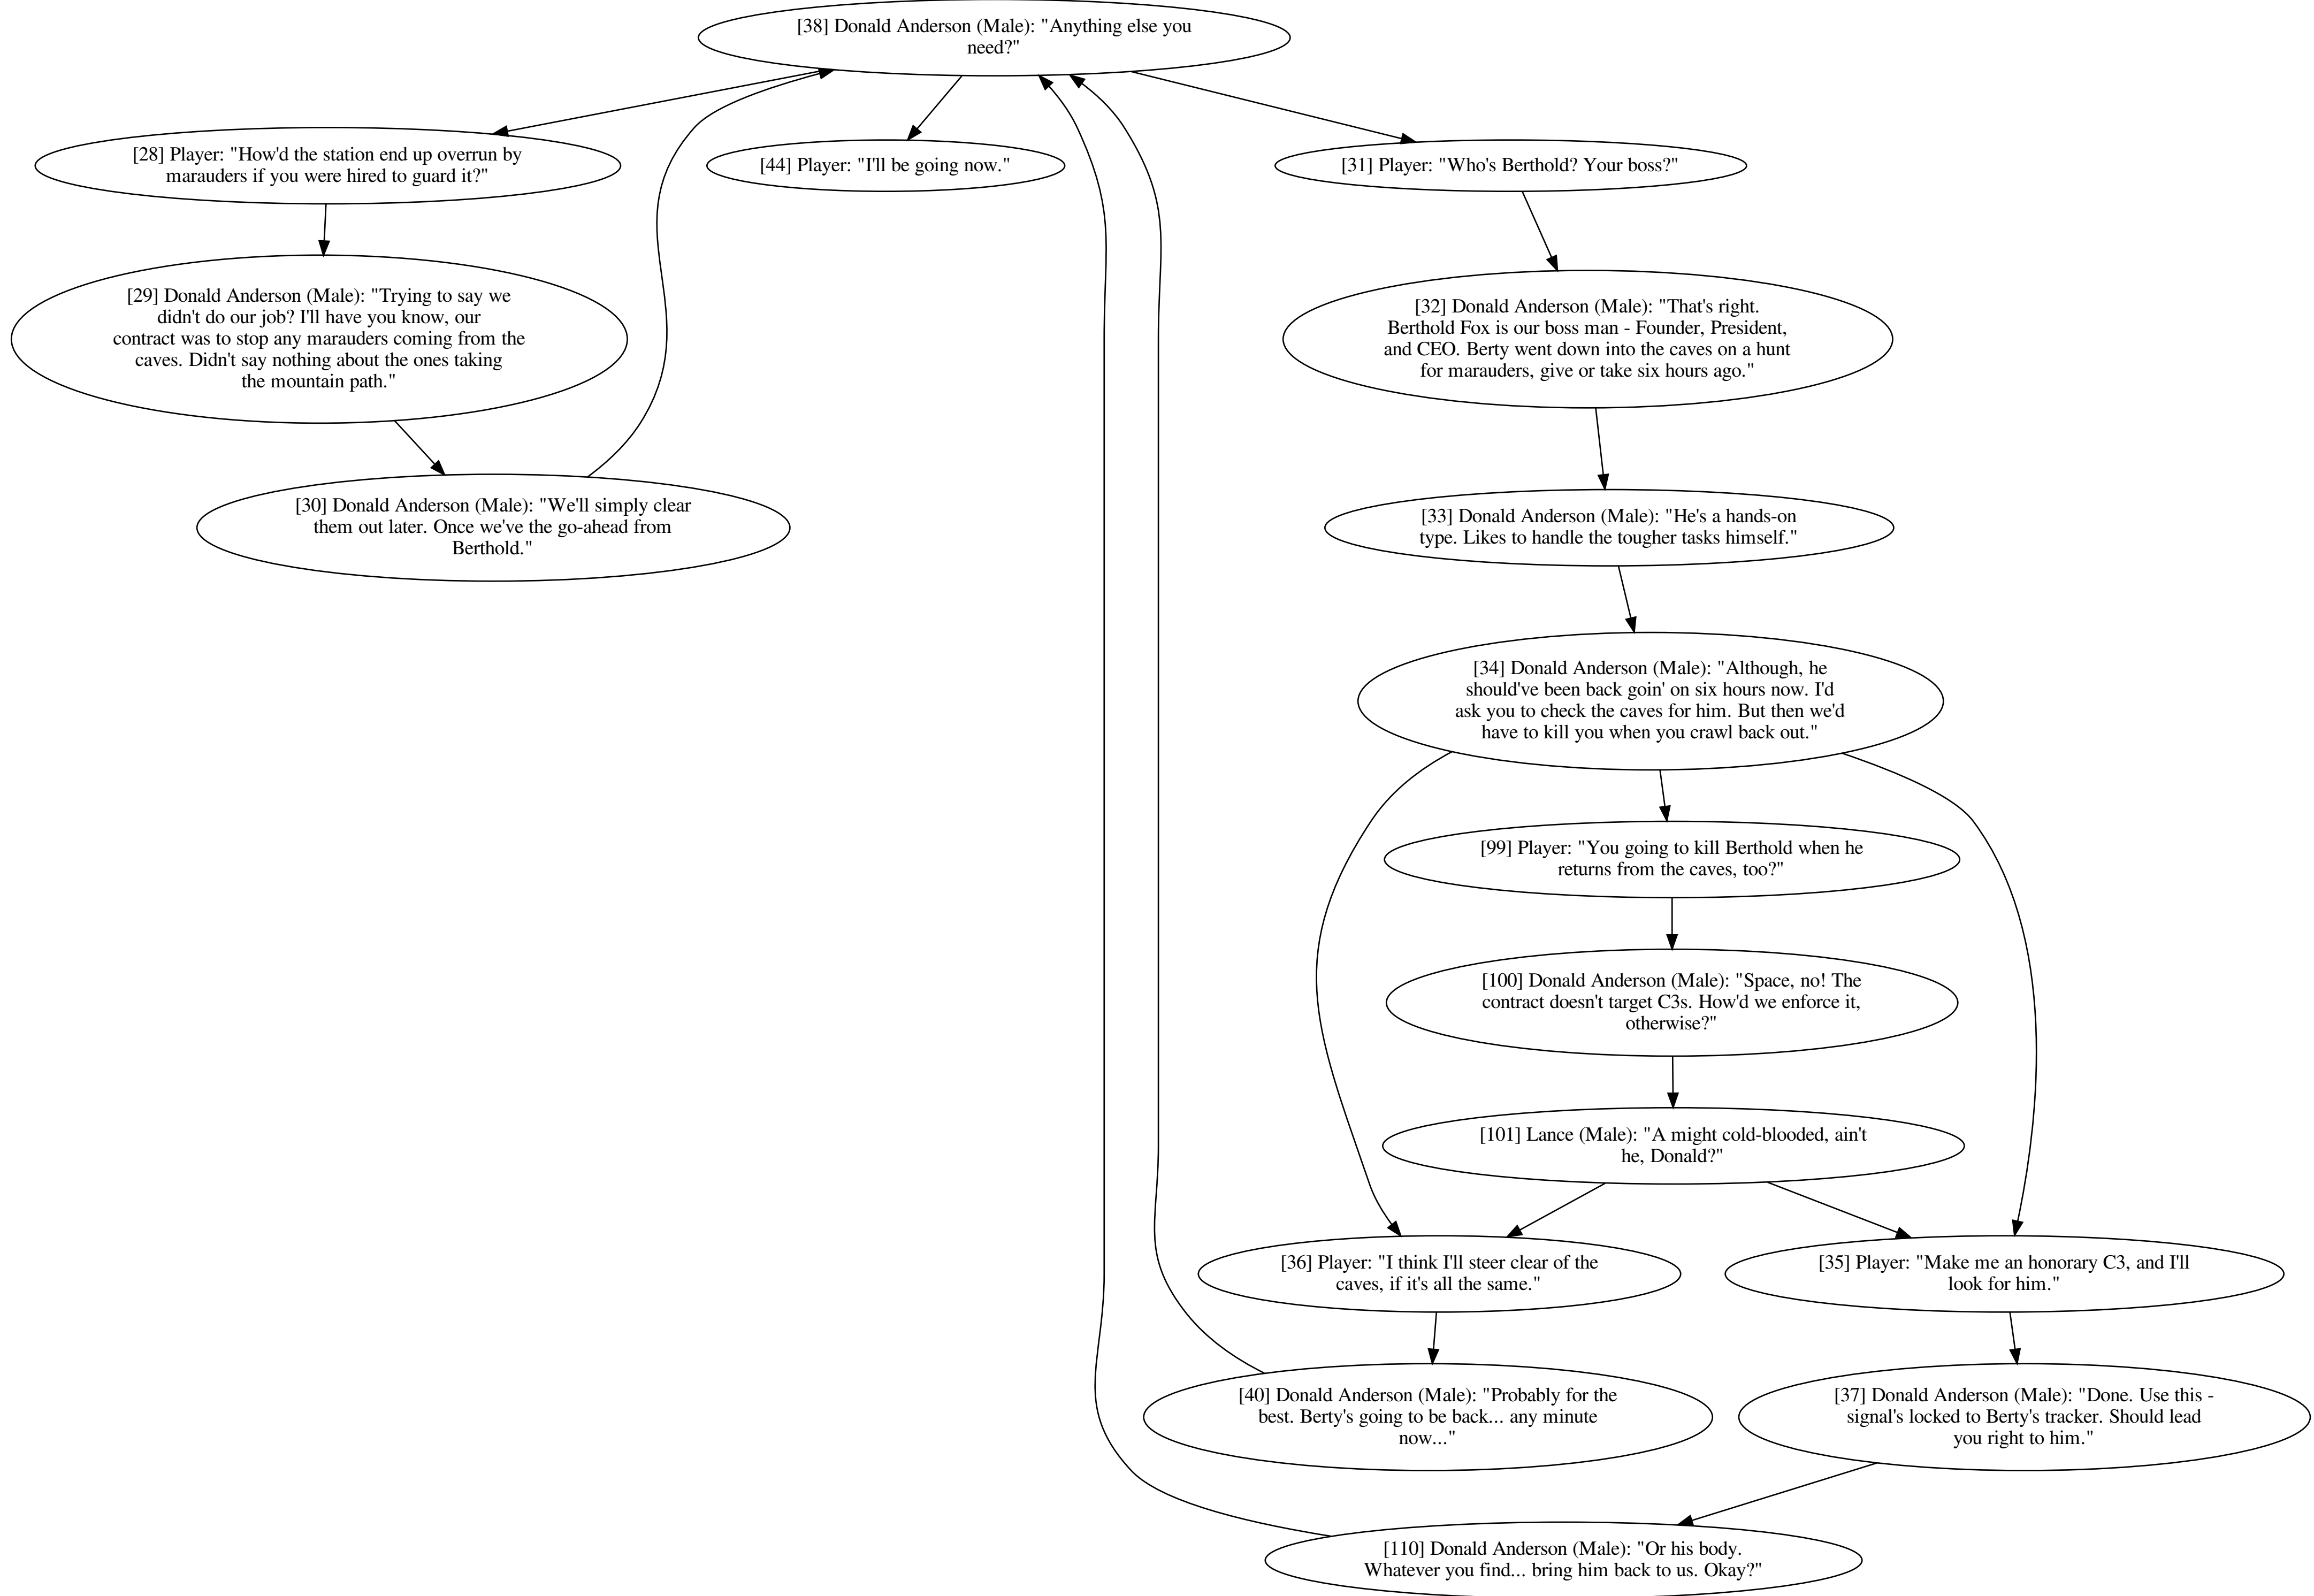

Supplement: software [file 2024.emnlp-main.520.software.zip]

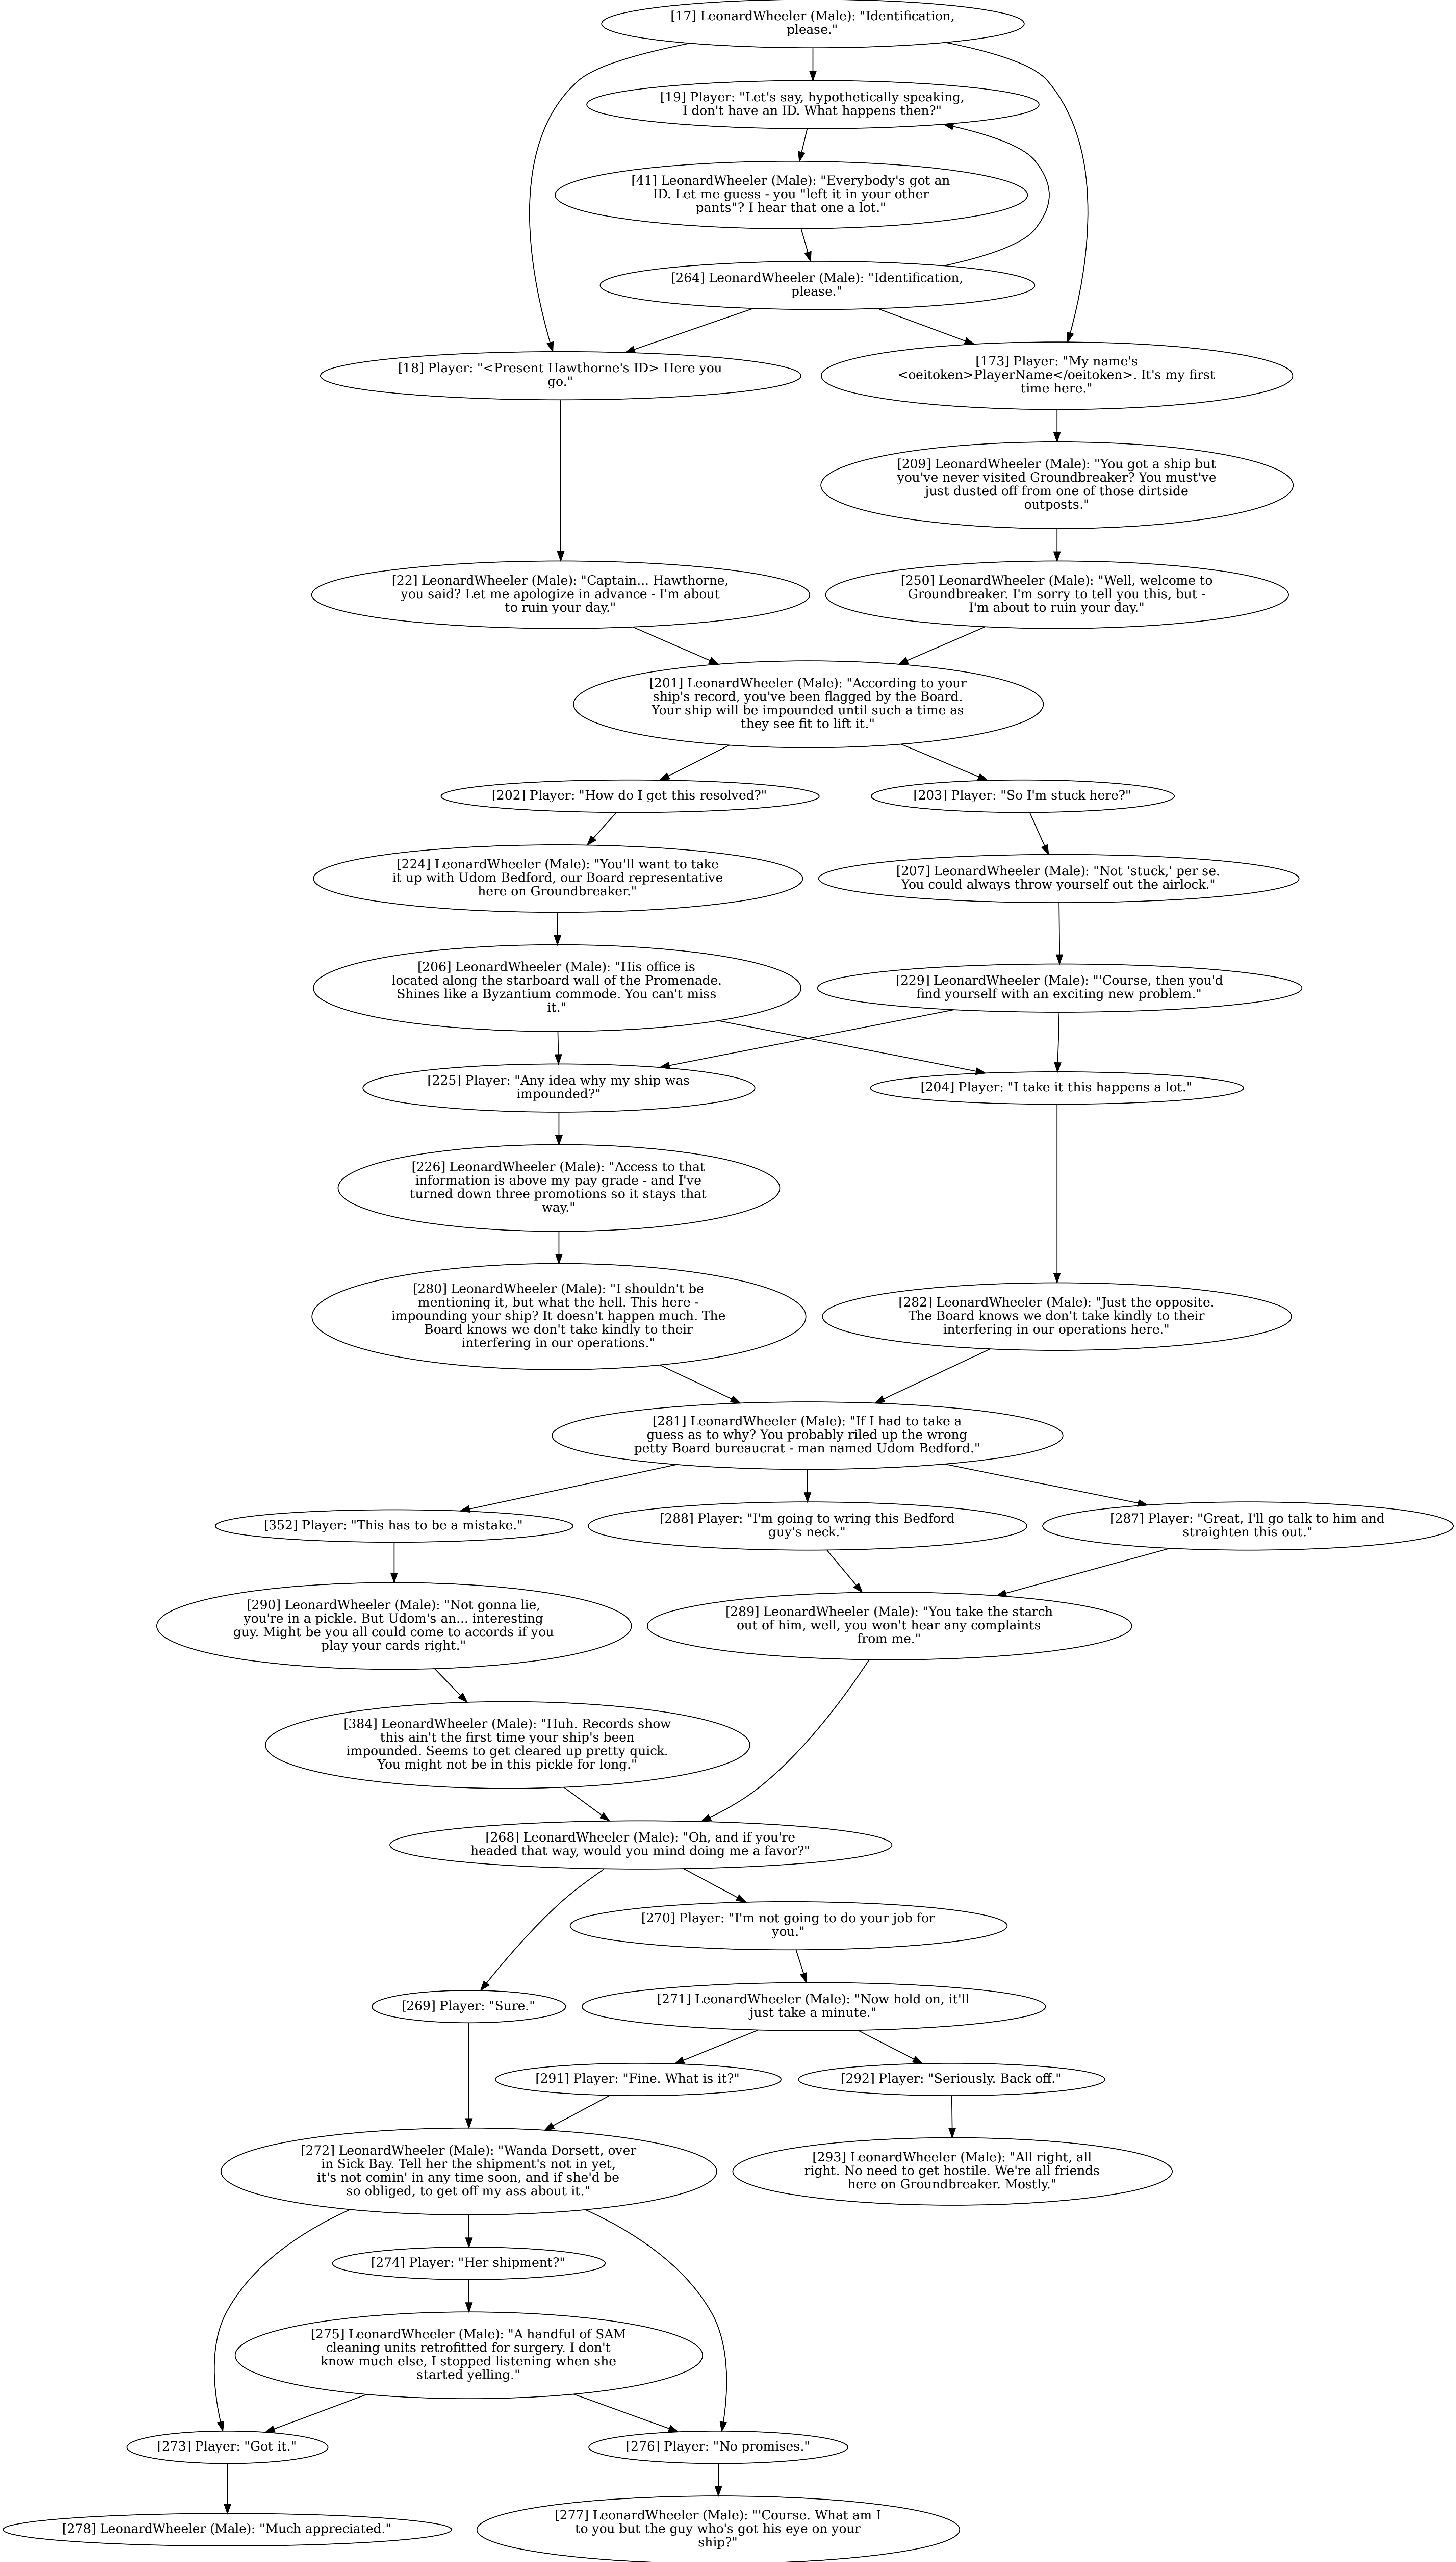

Supplement: software [file 2024.emnlp-main.520.software.zip]

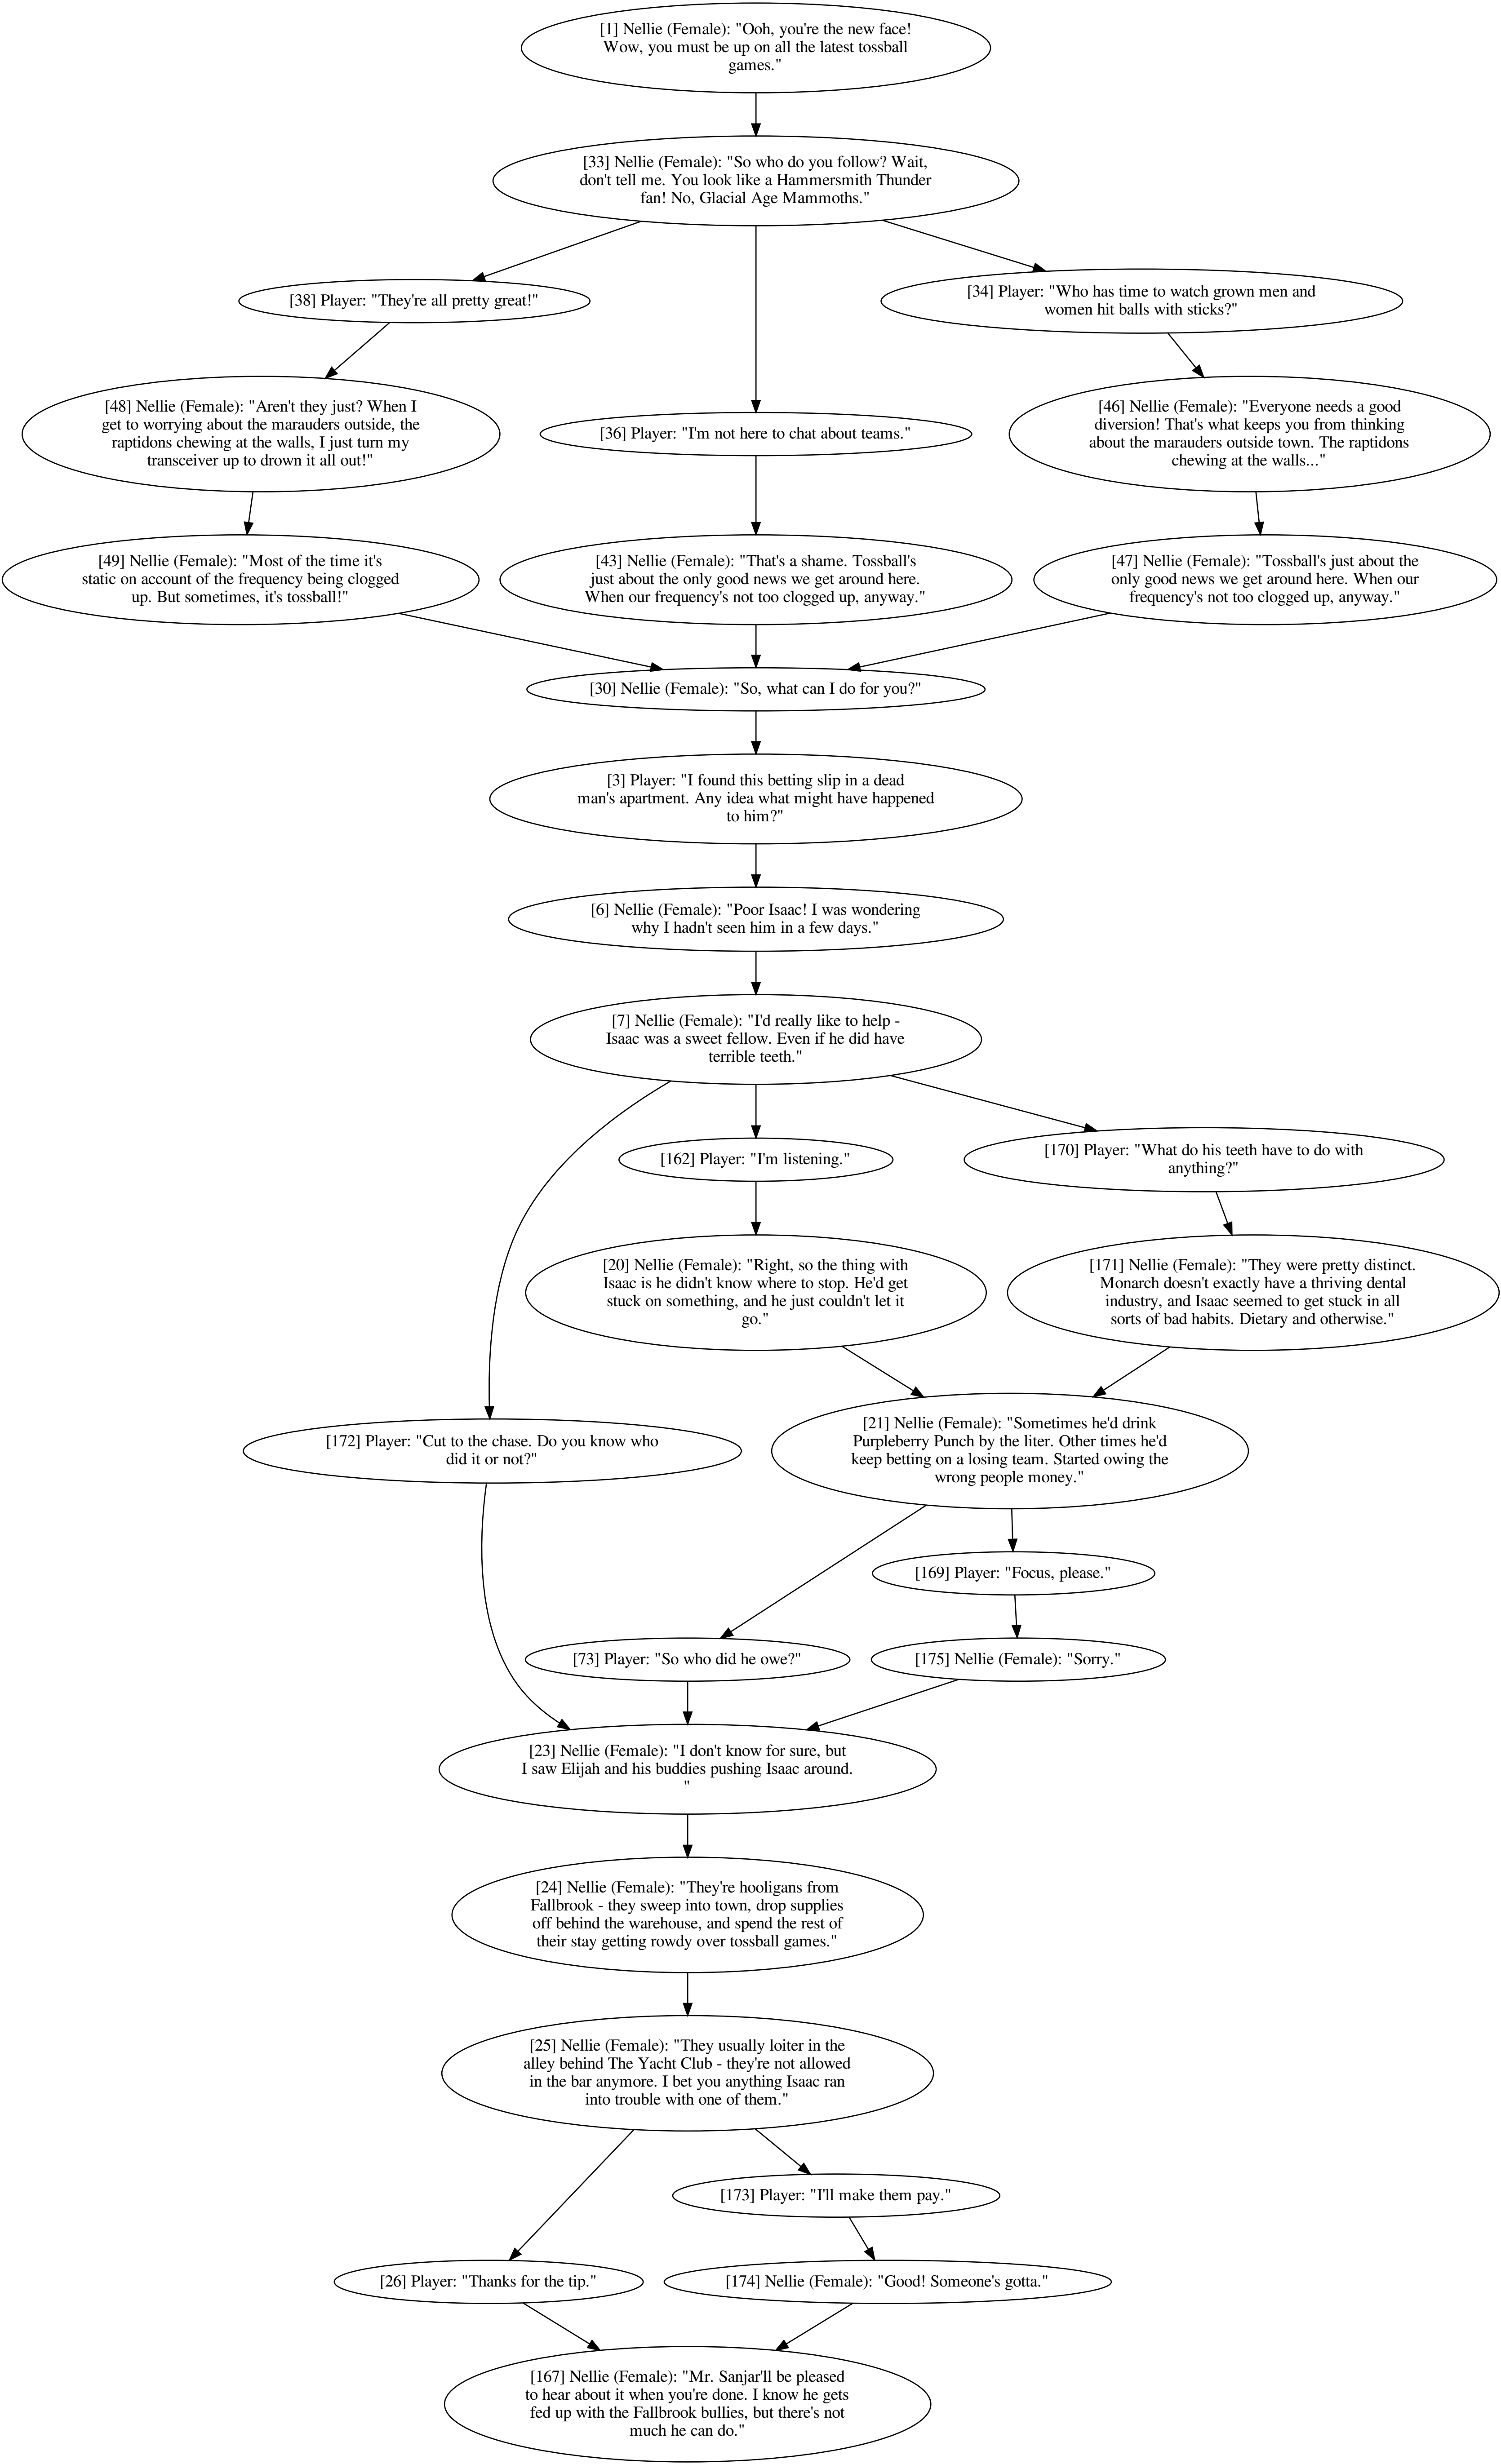

Supplement: software [file 2024.emnlp-main.520.software.zip]

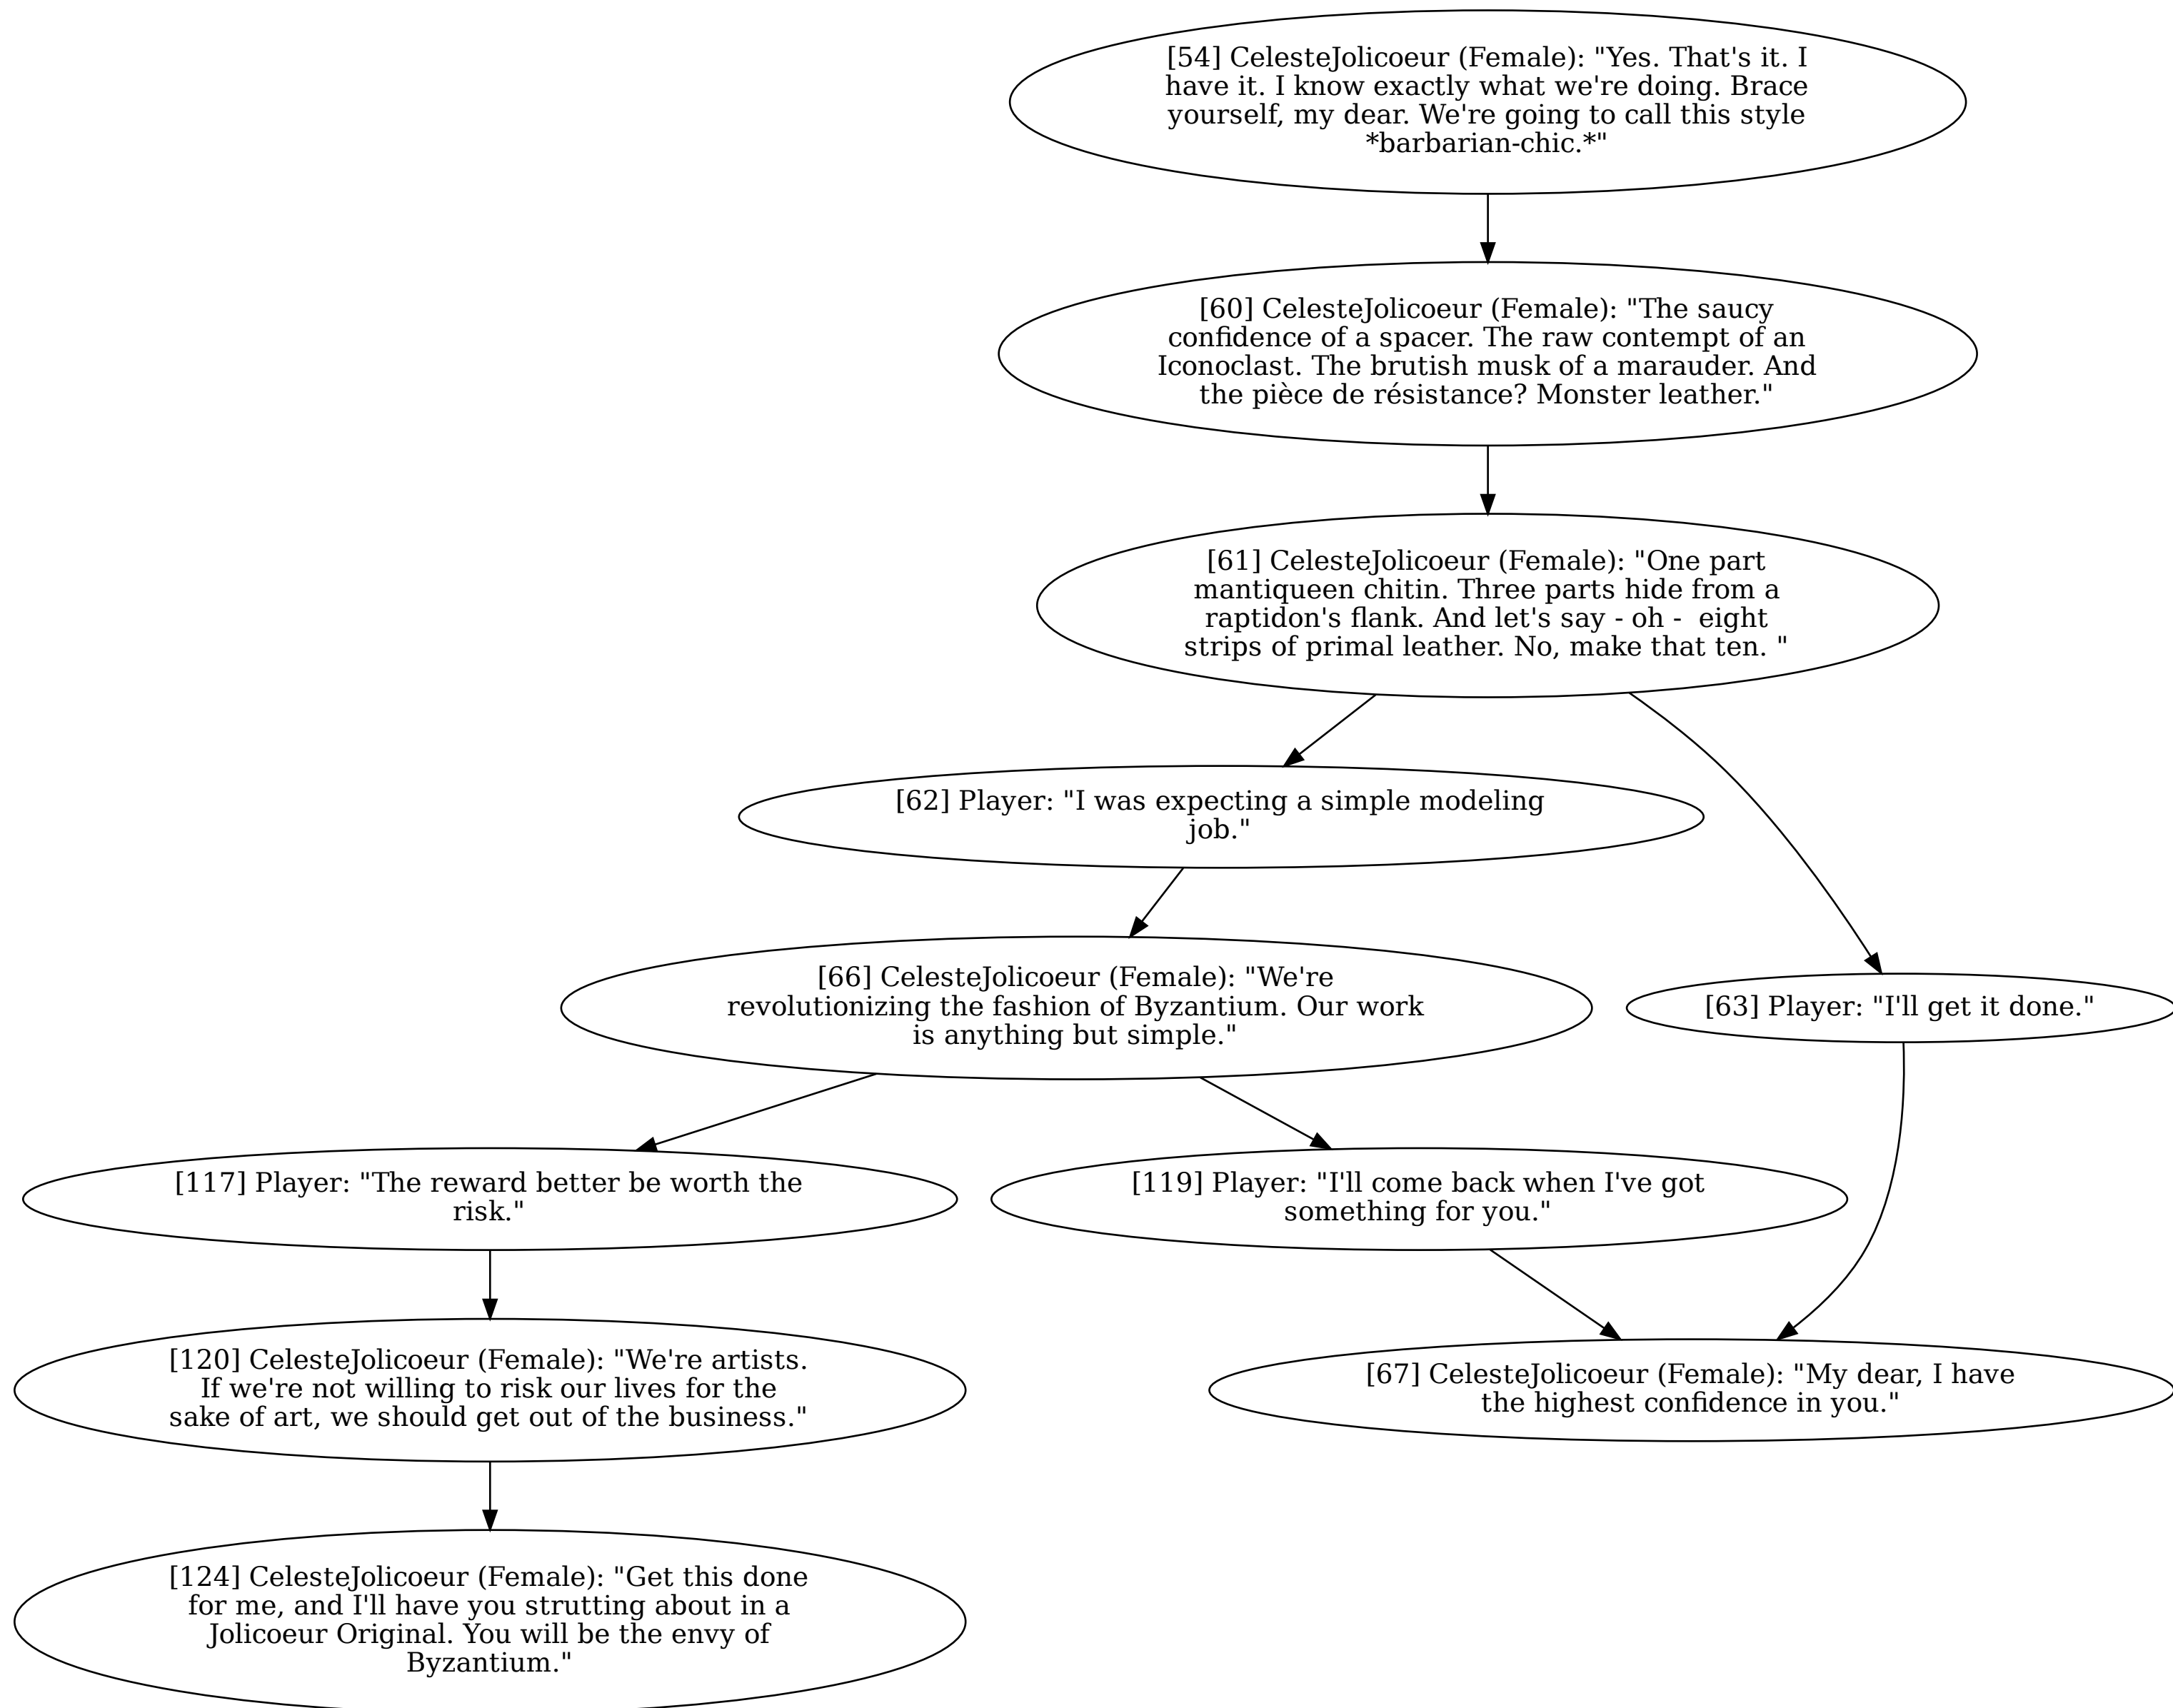

Supplement: software [file 2024.emnlp-main.520.software.zip]

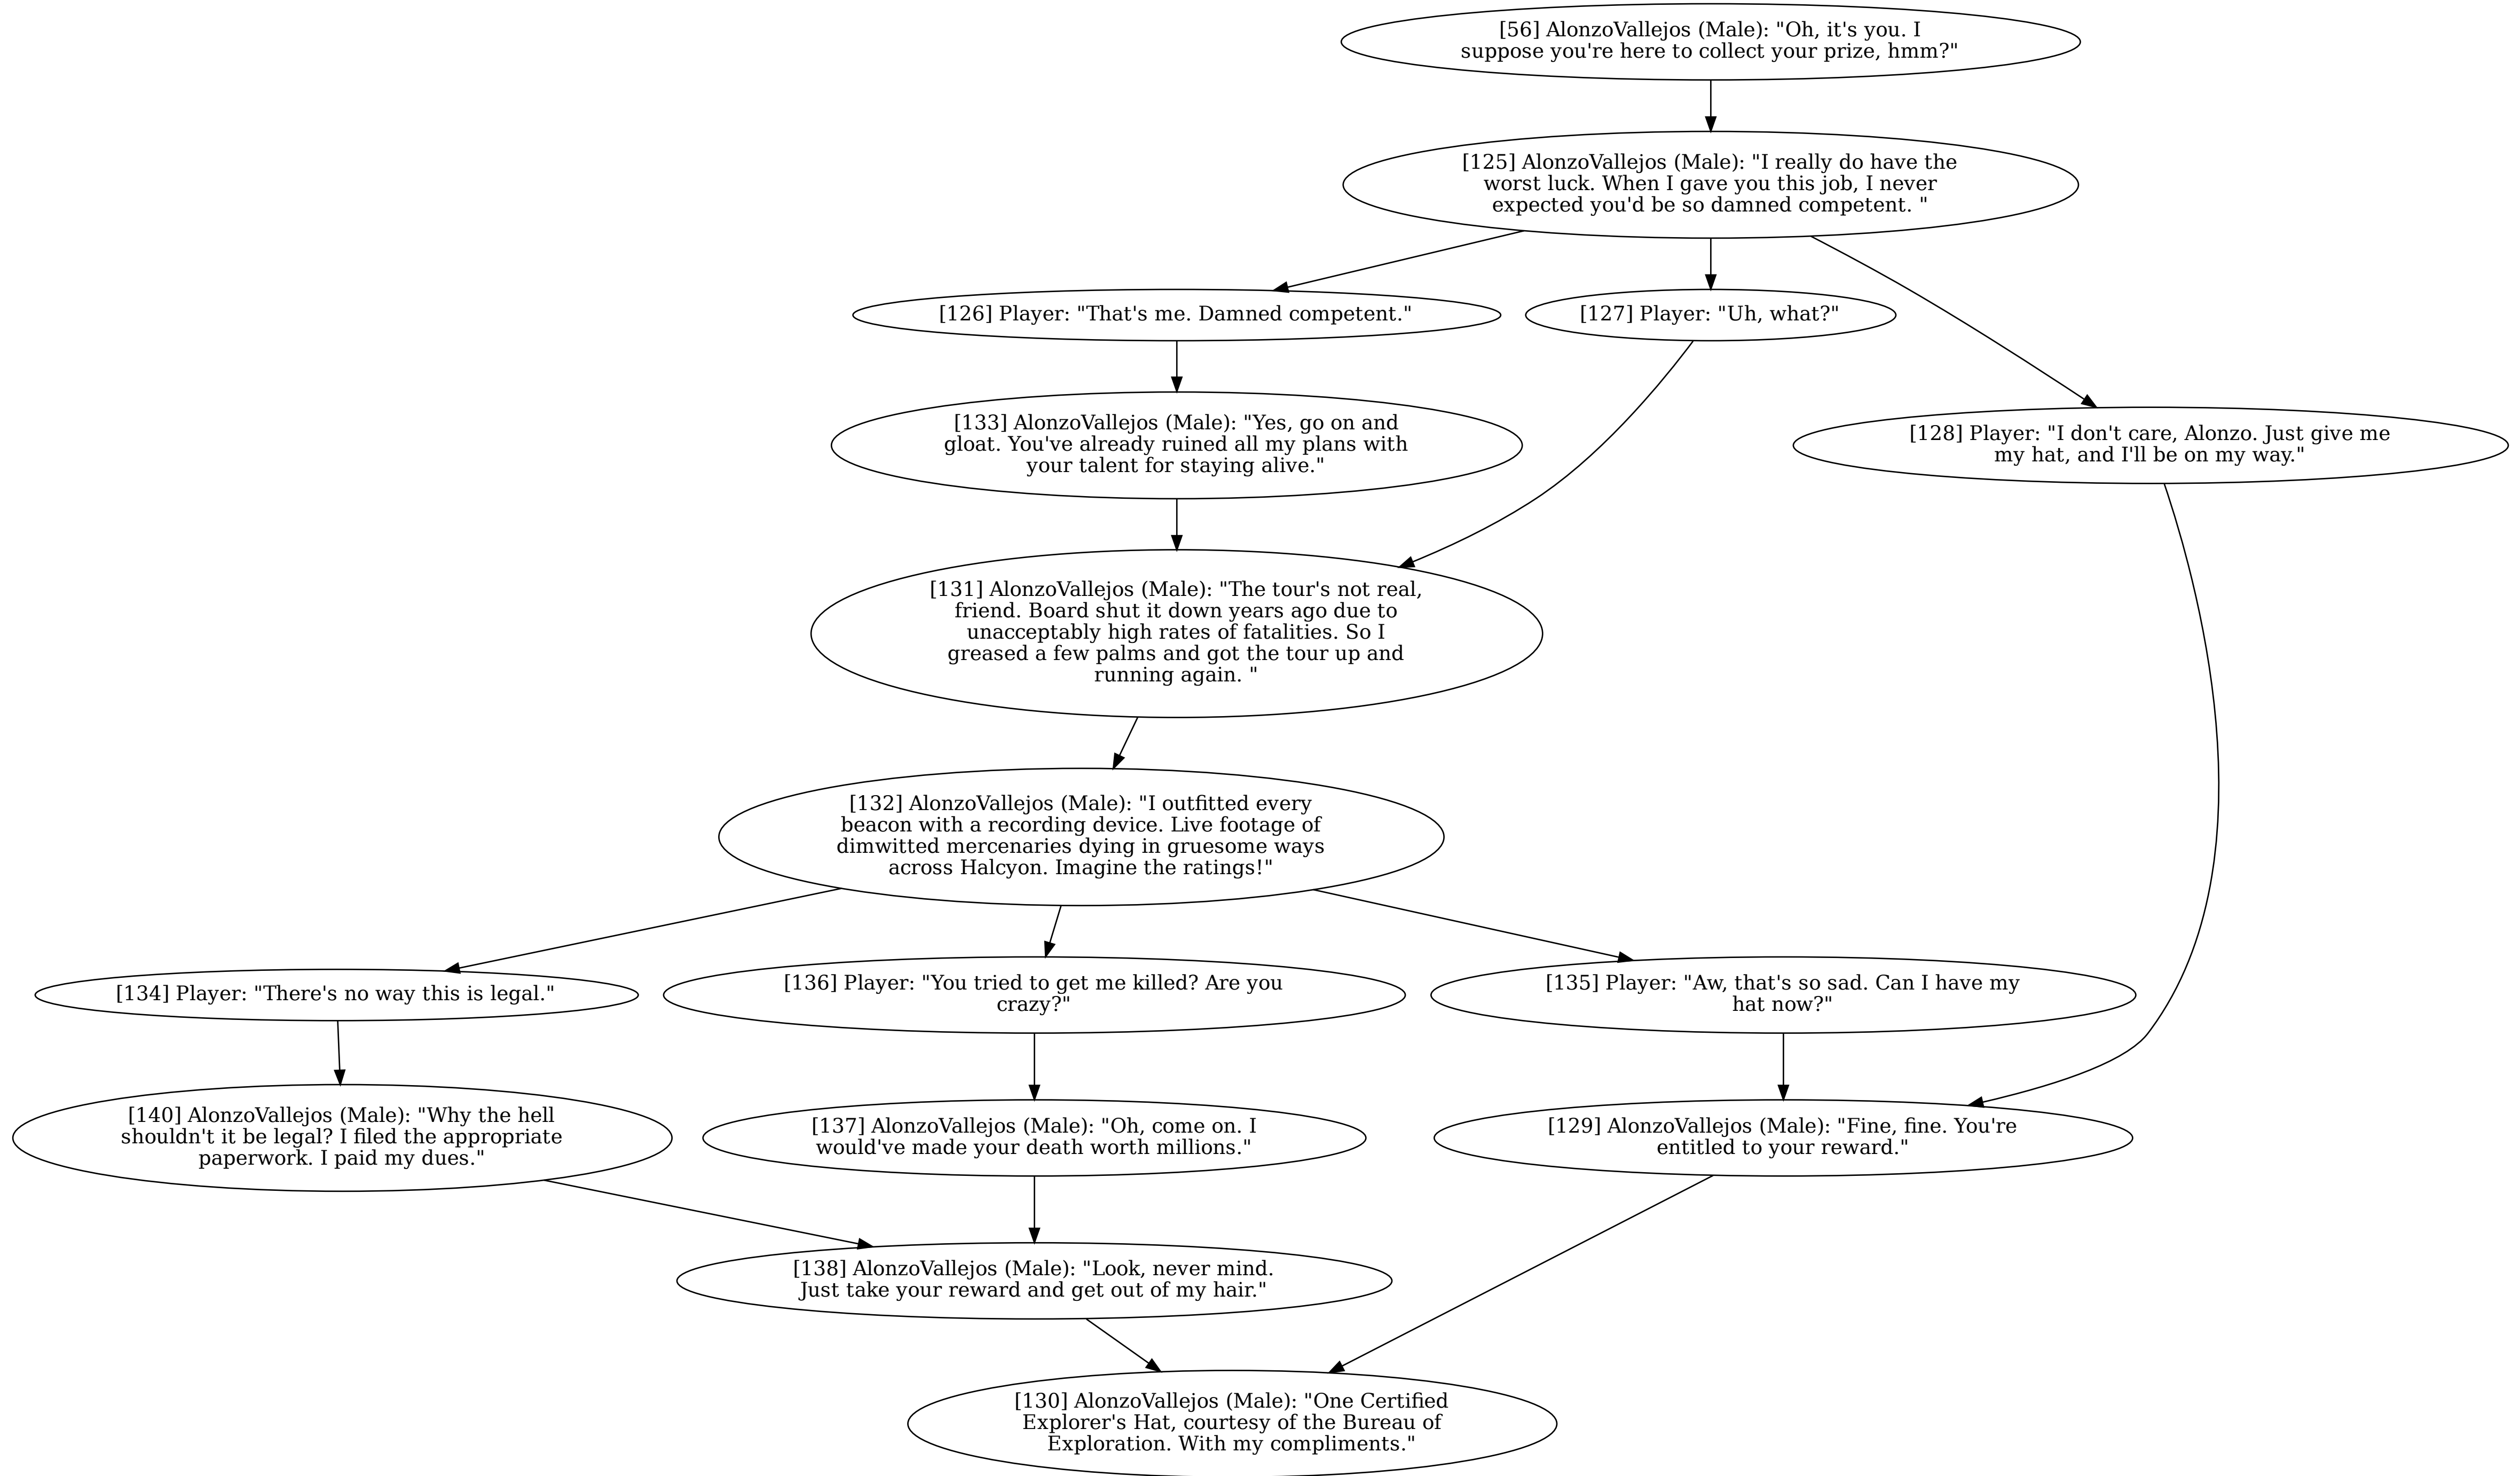

Supplement: software [file 2024.emnlp-main.520.software.zip]

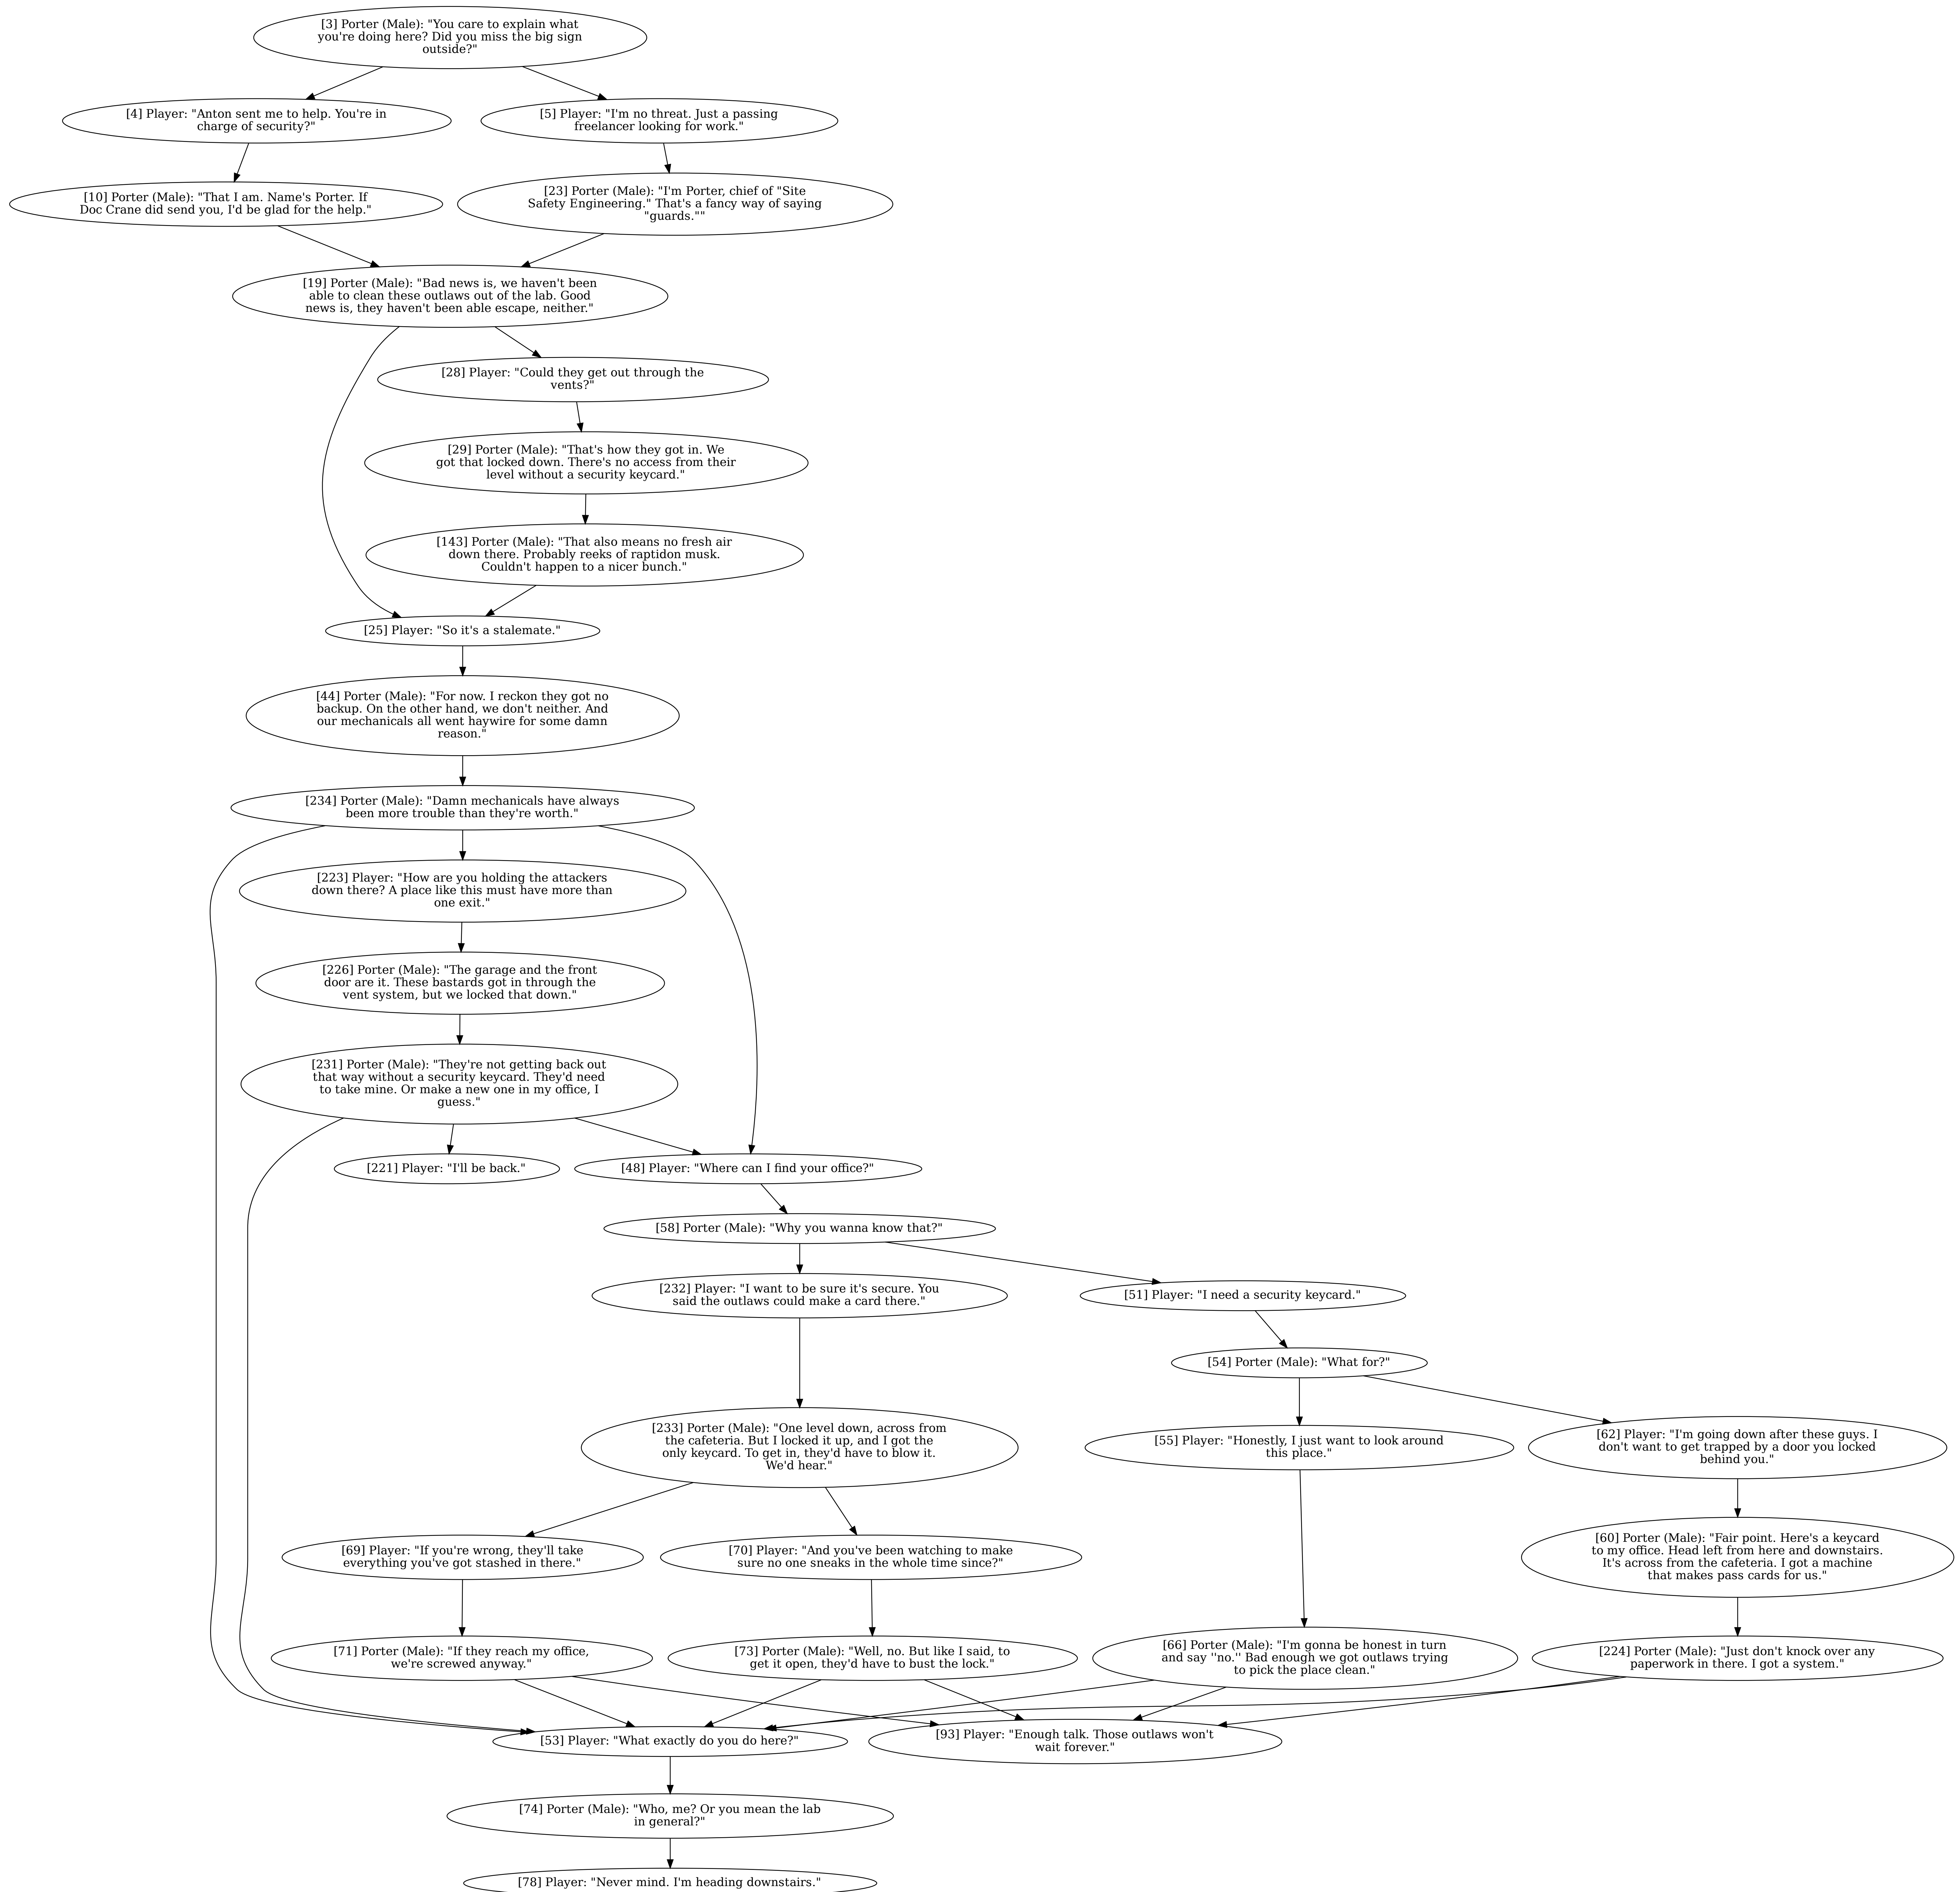

Supplement: software [file 2024.emnlp-main.520.software.zip]

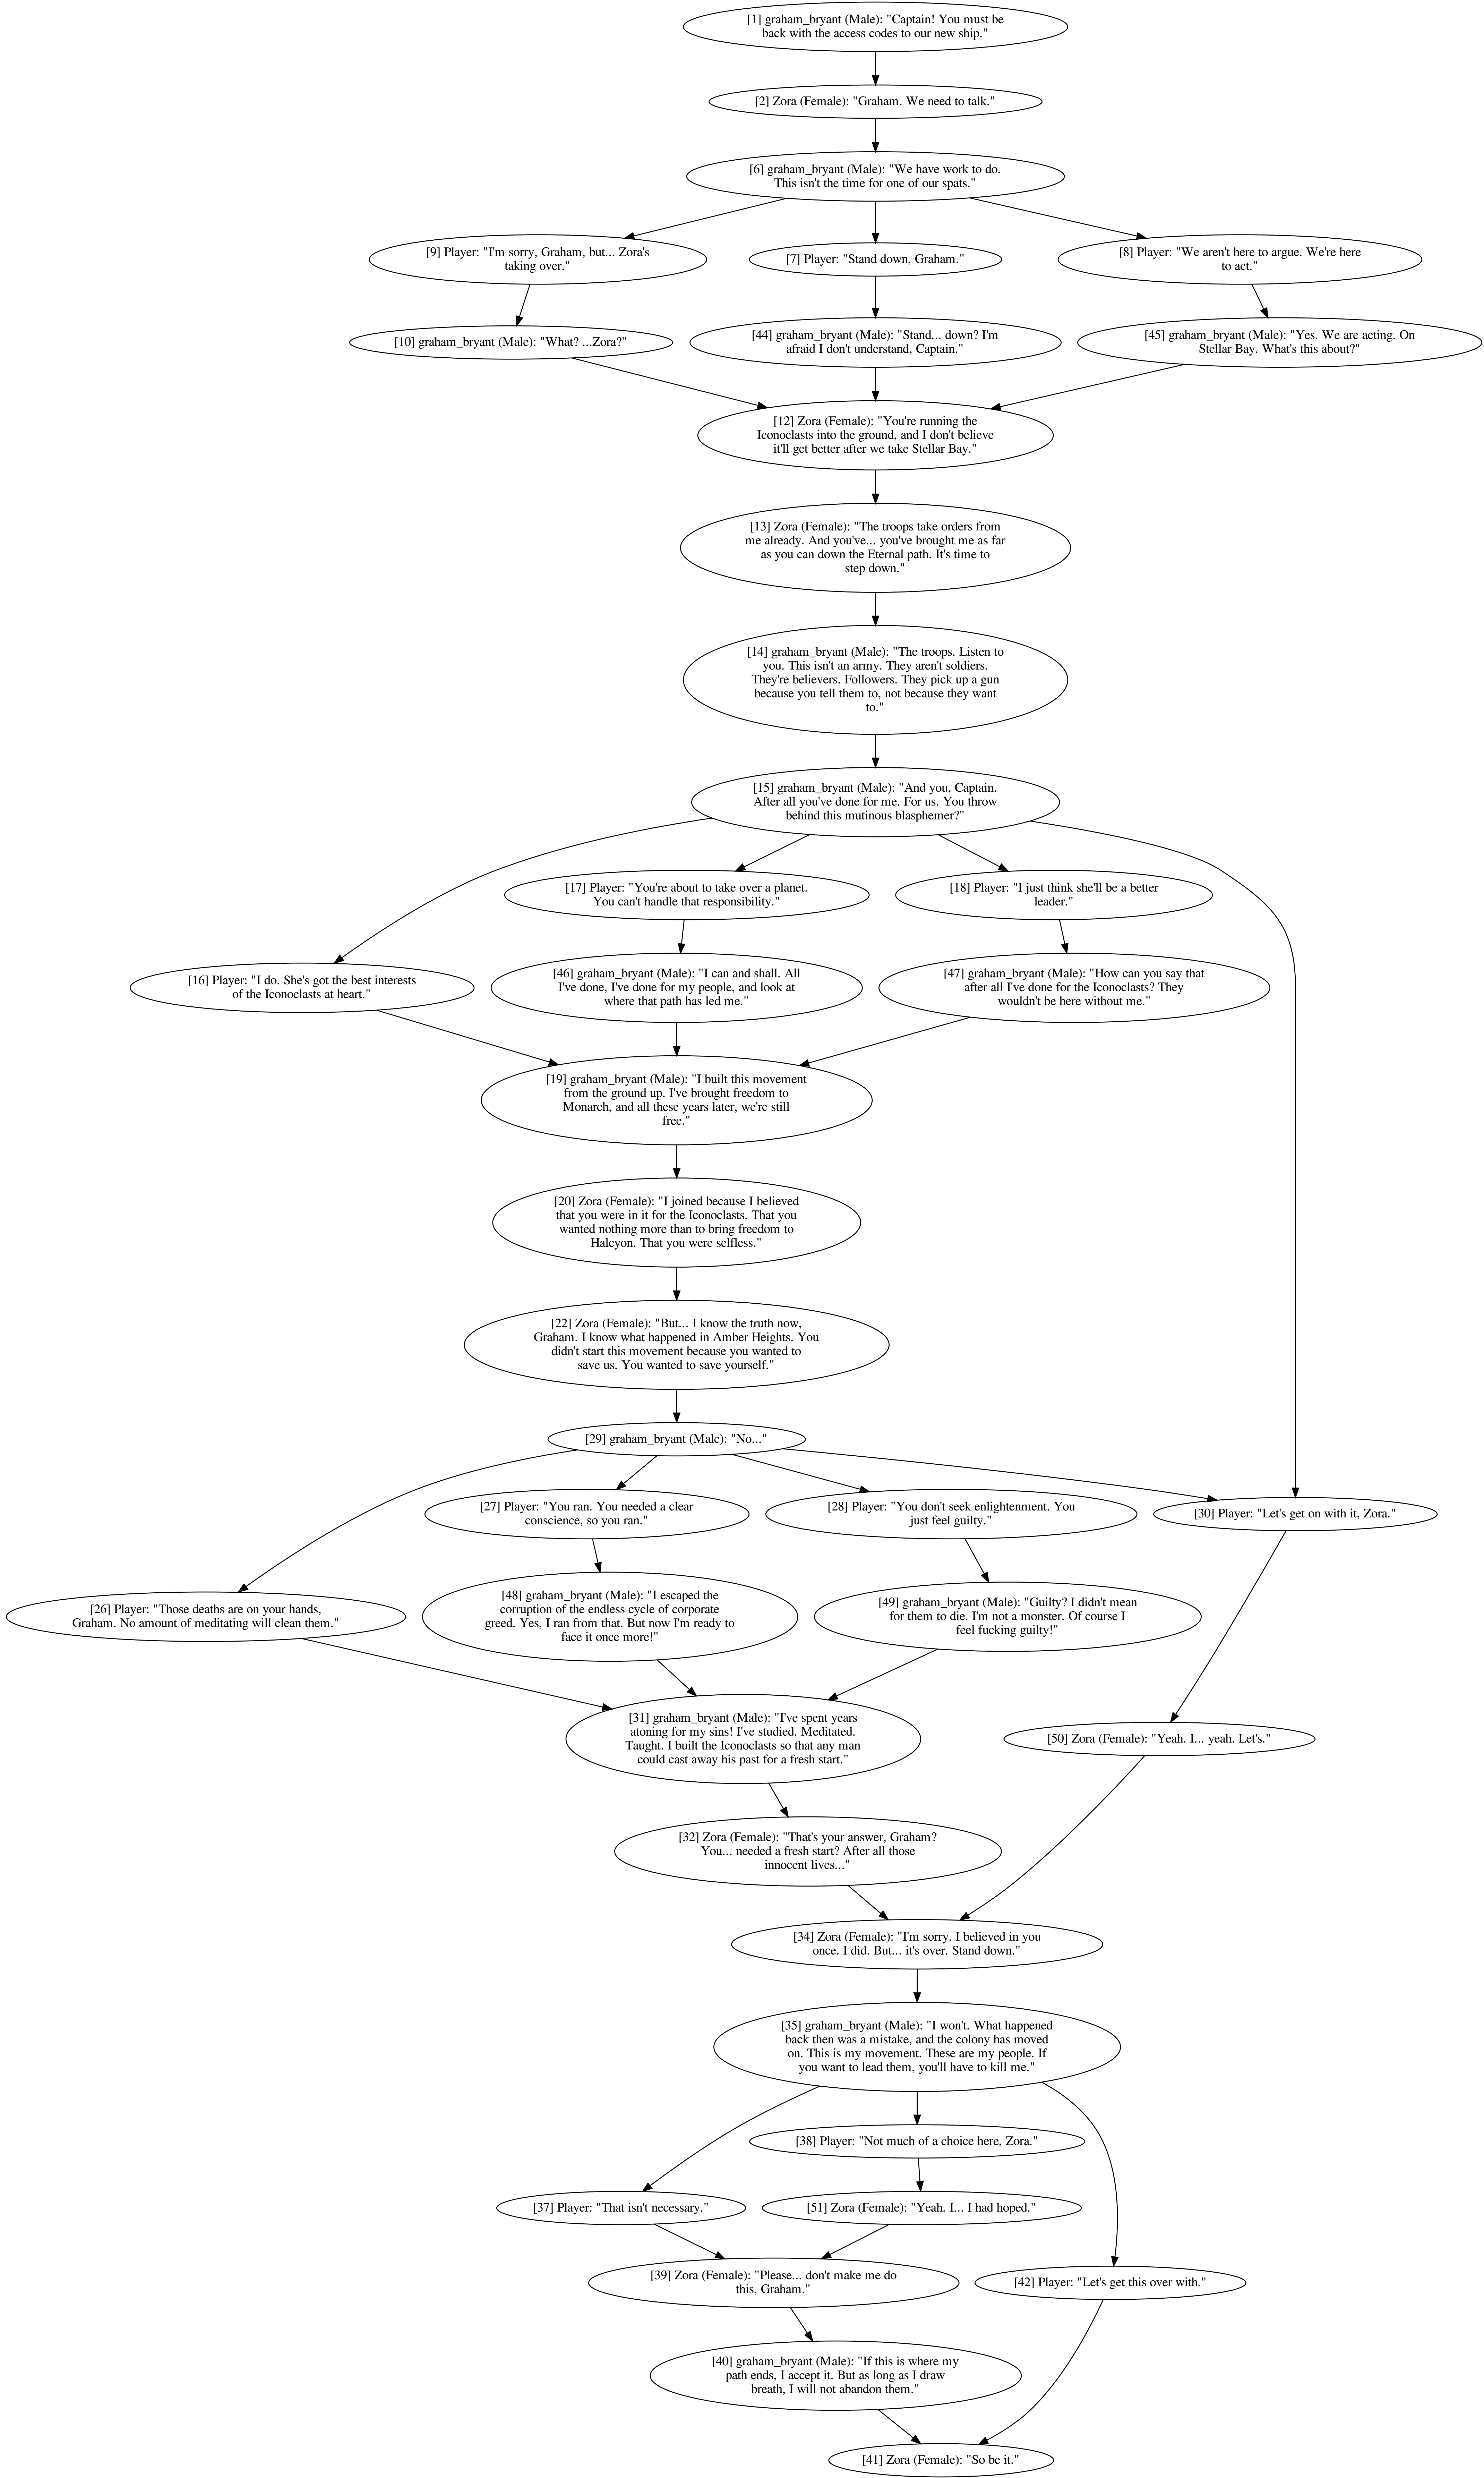

Supplement: software [file 2024.emnlp-main.520.software.zip]

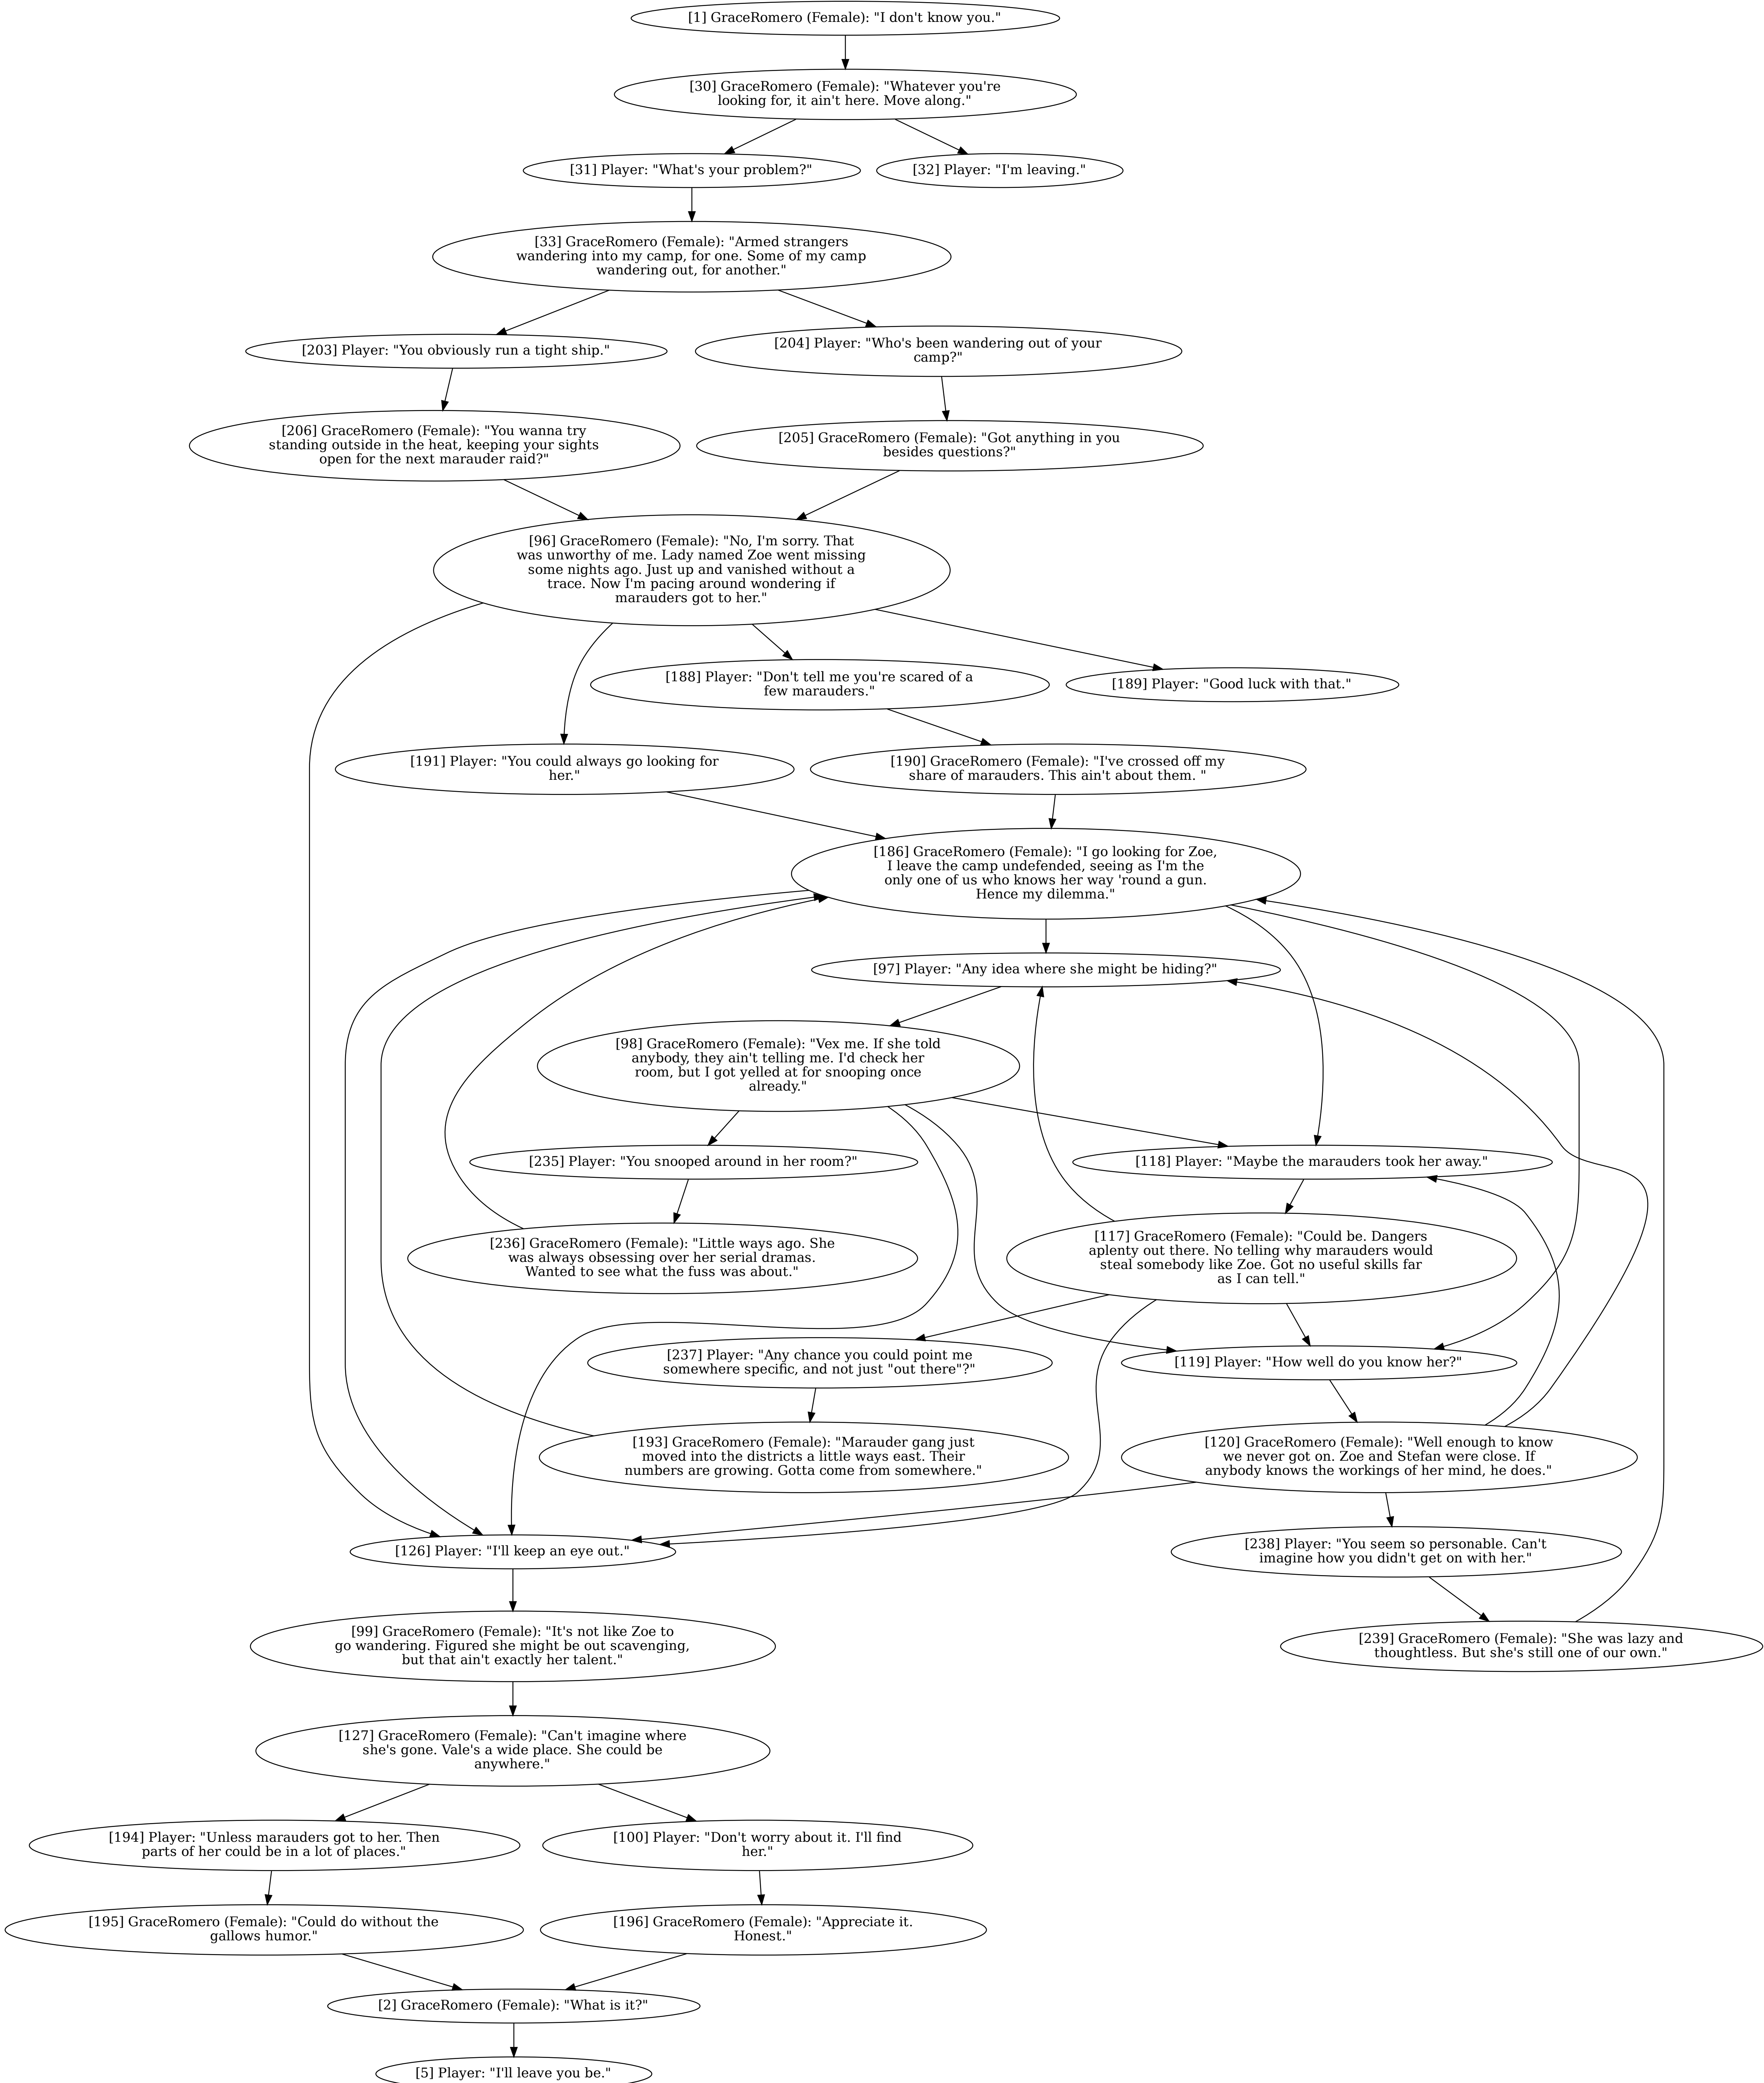

Supplement: software [file 2024.emnlp-main.520.software.zip]

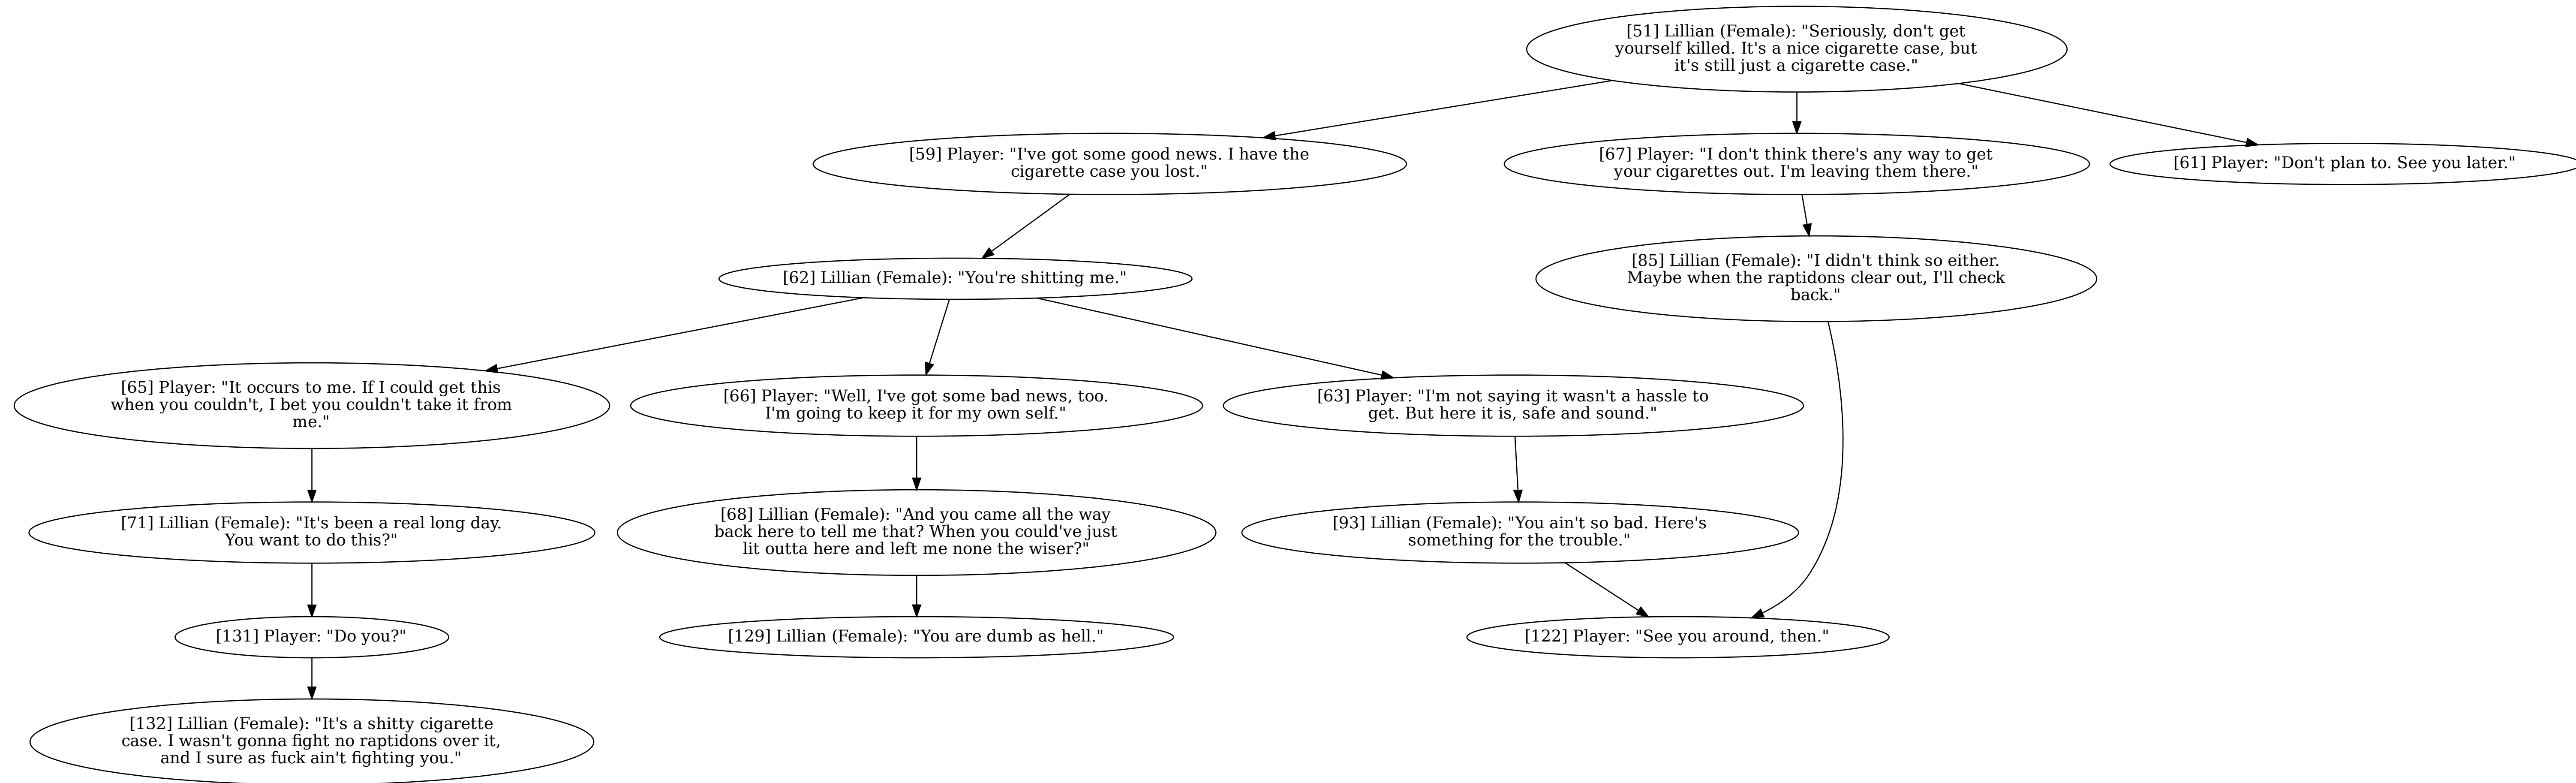

Supplement: software [file 2024.emnlp-main.520.software.zip]

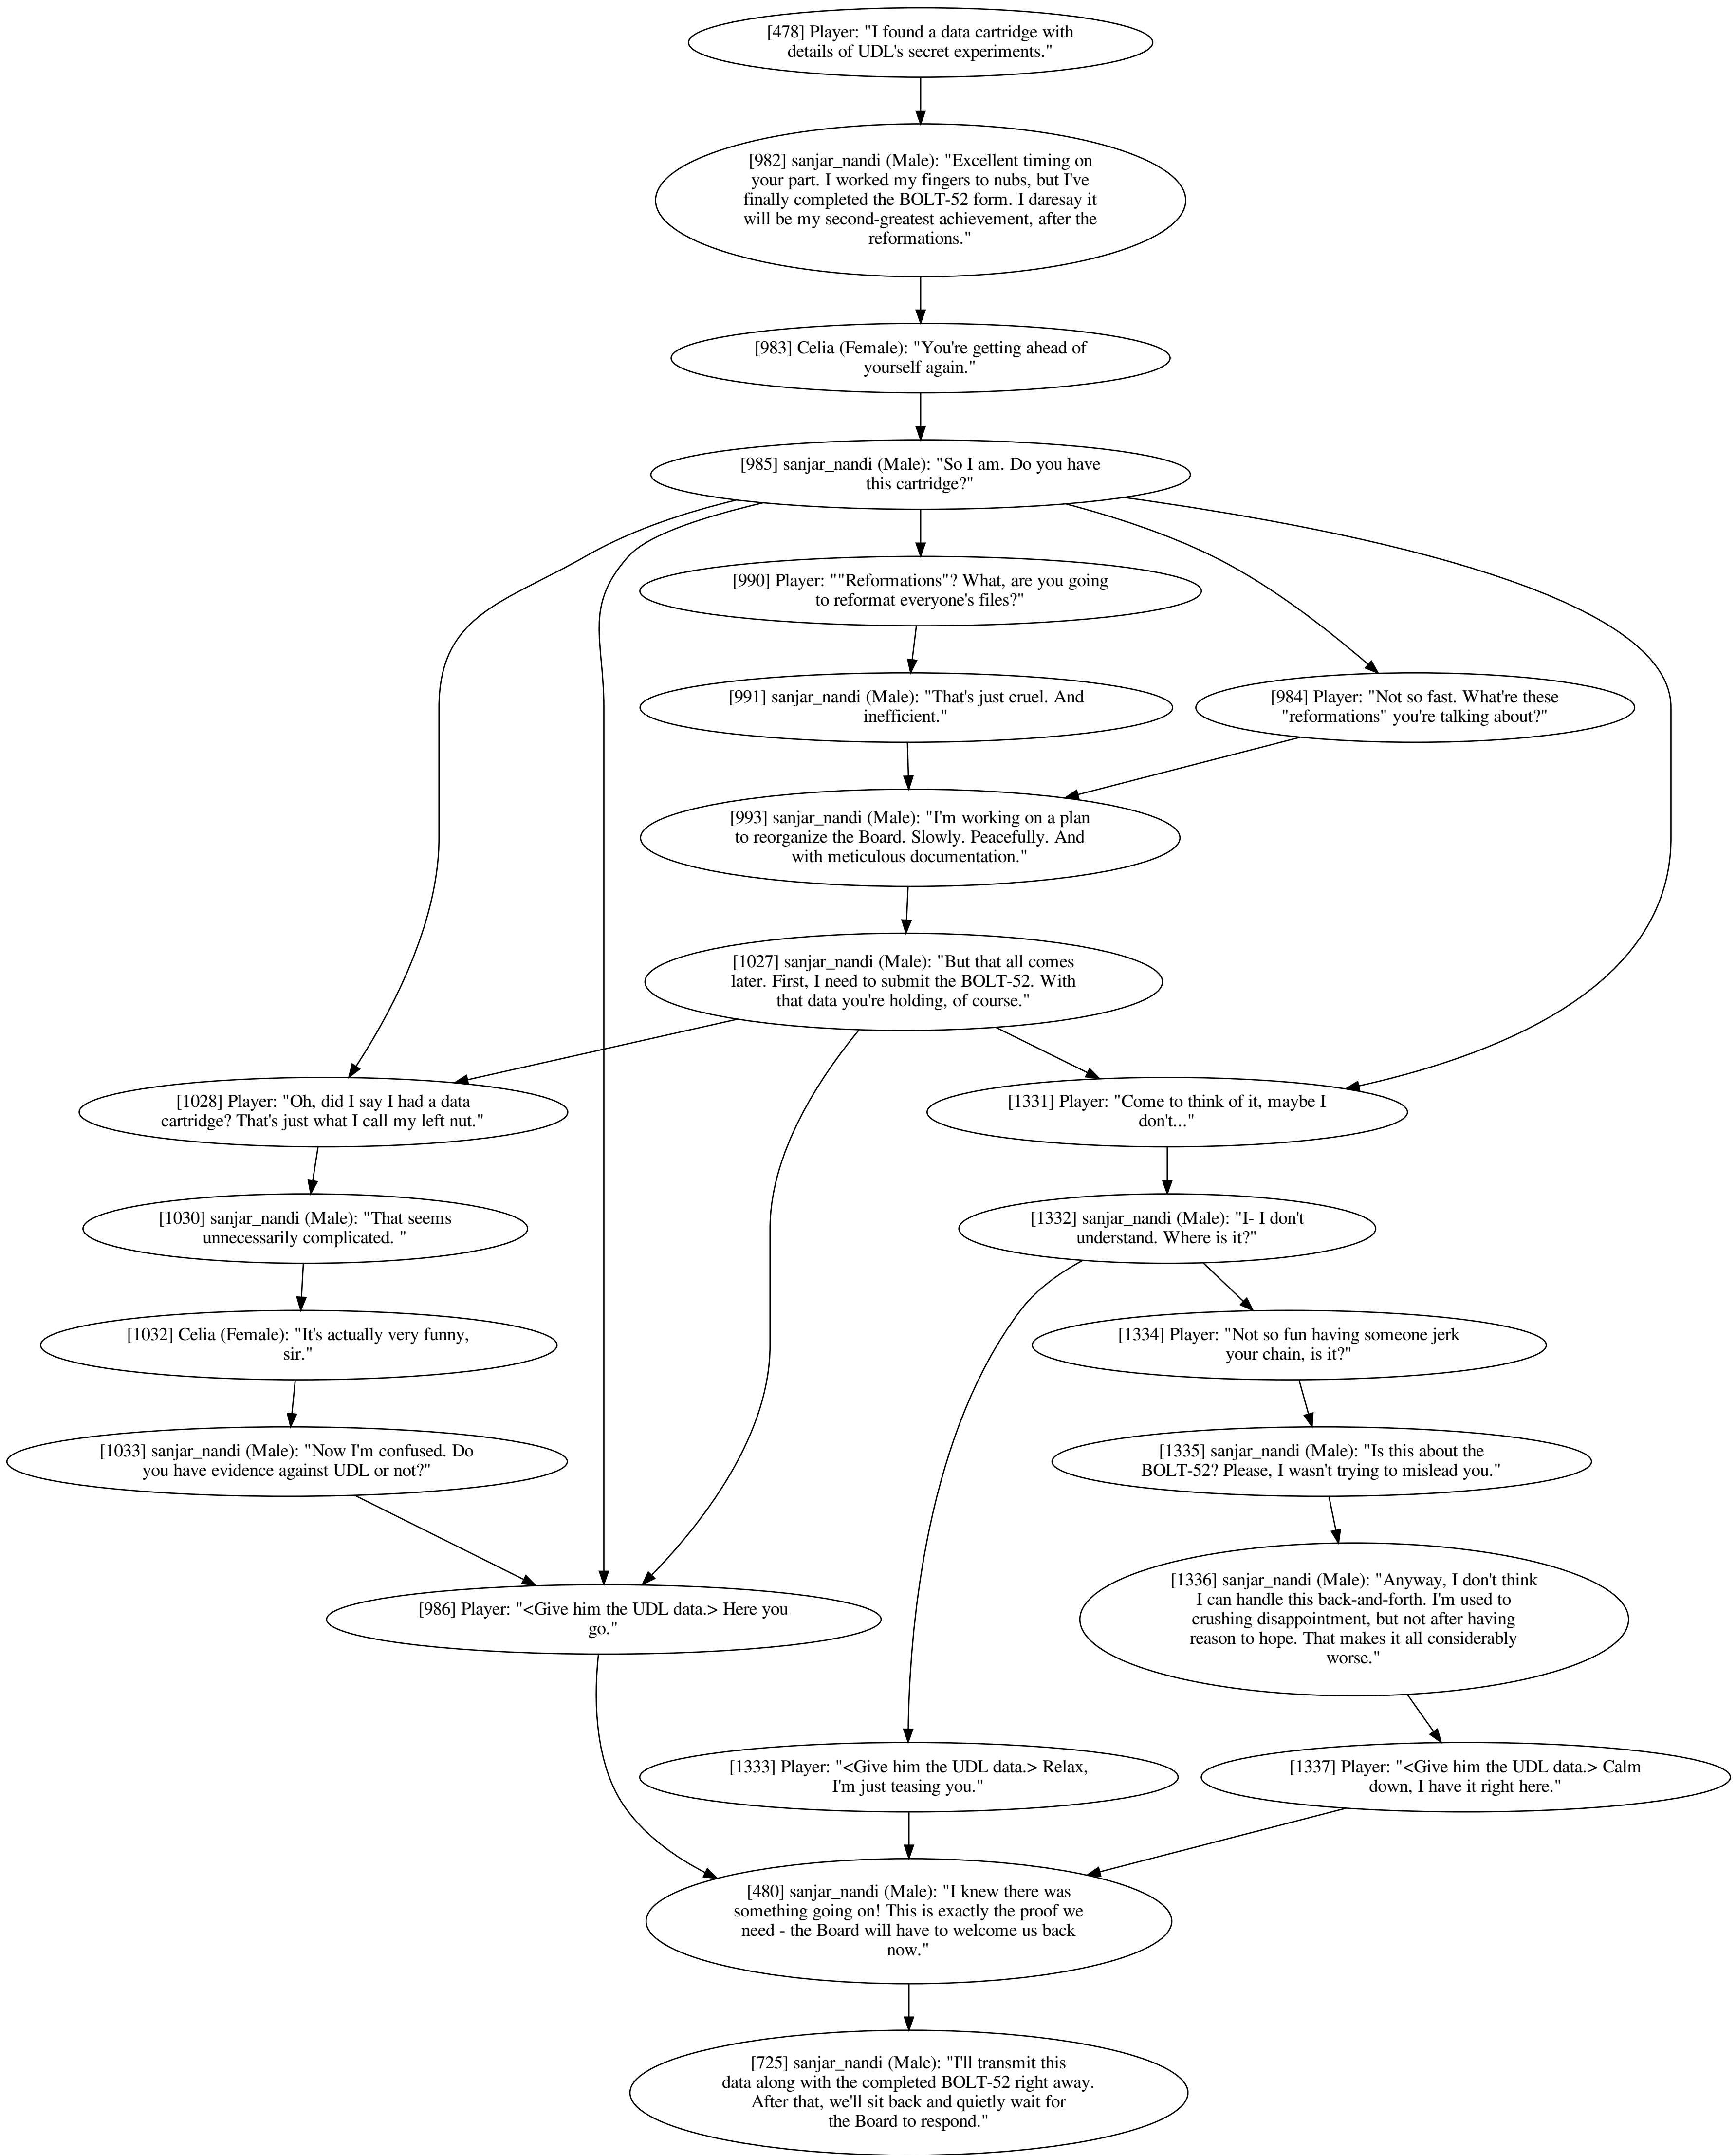

Supplement: software [file 2024.emnlp-main.520.software.zip]

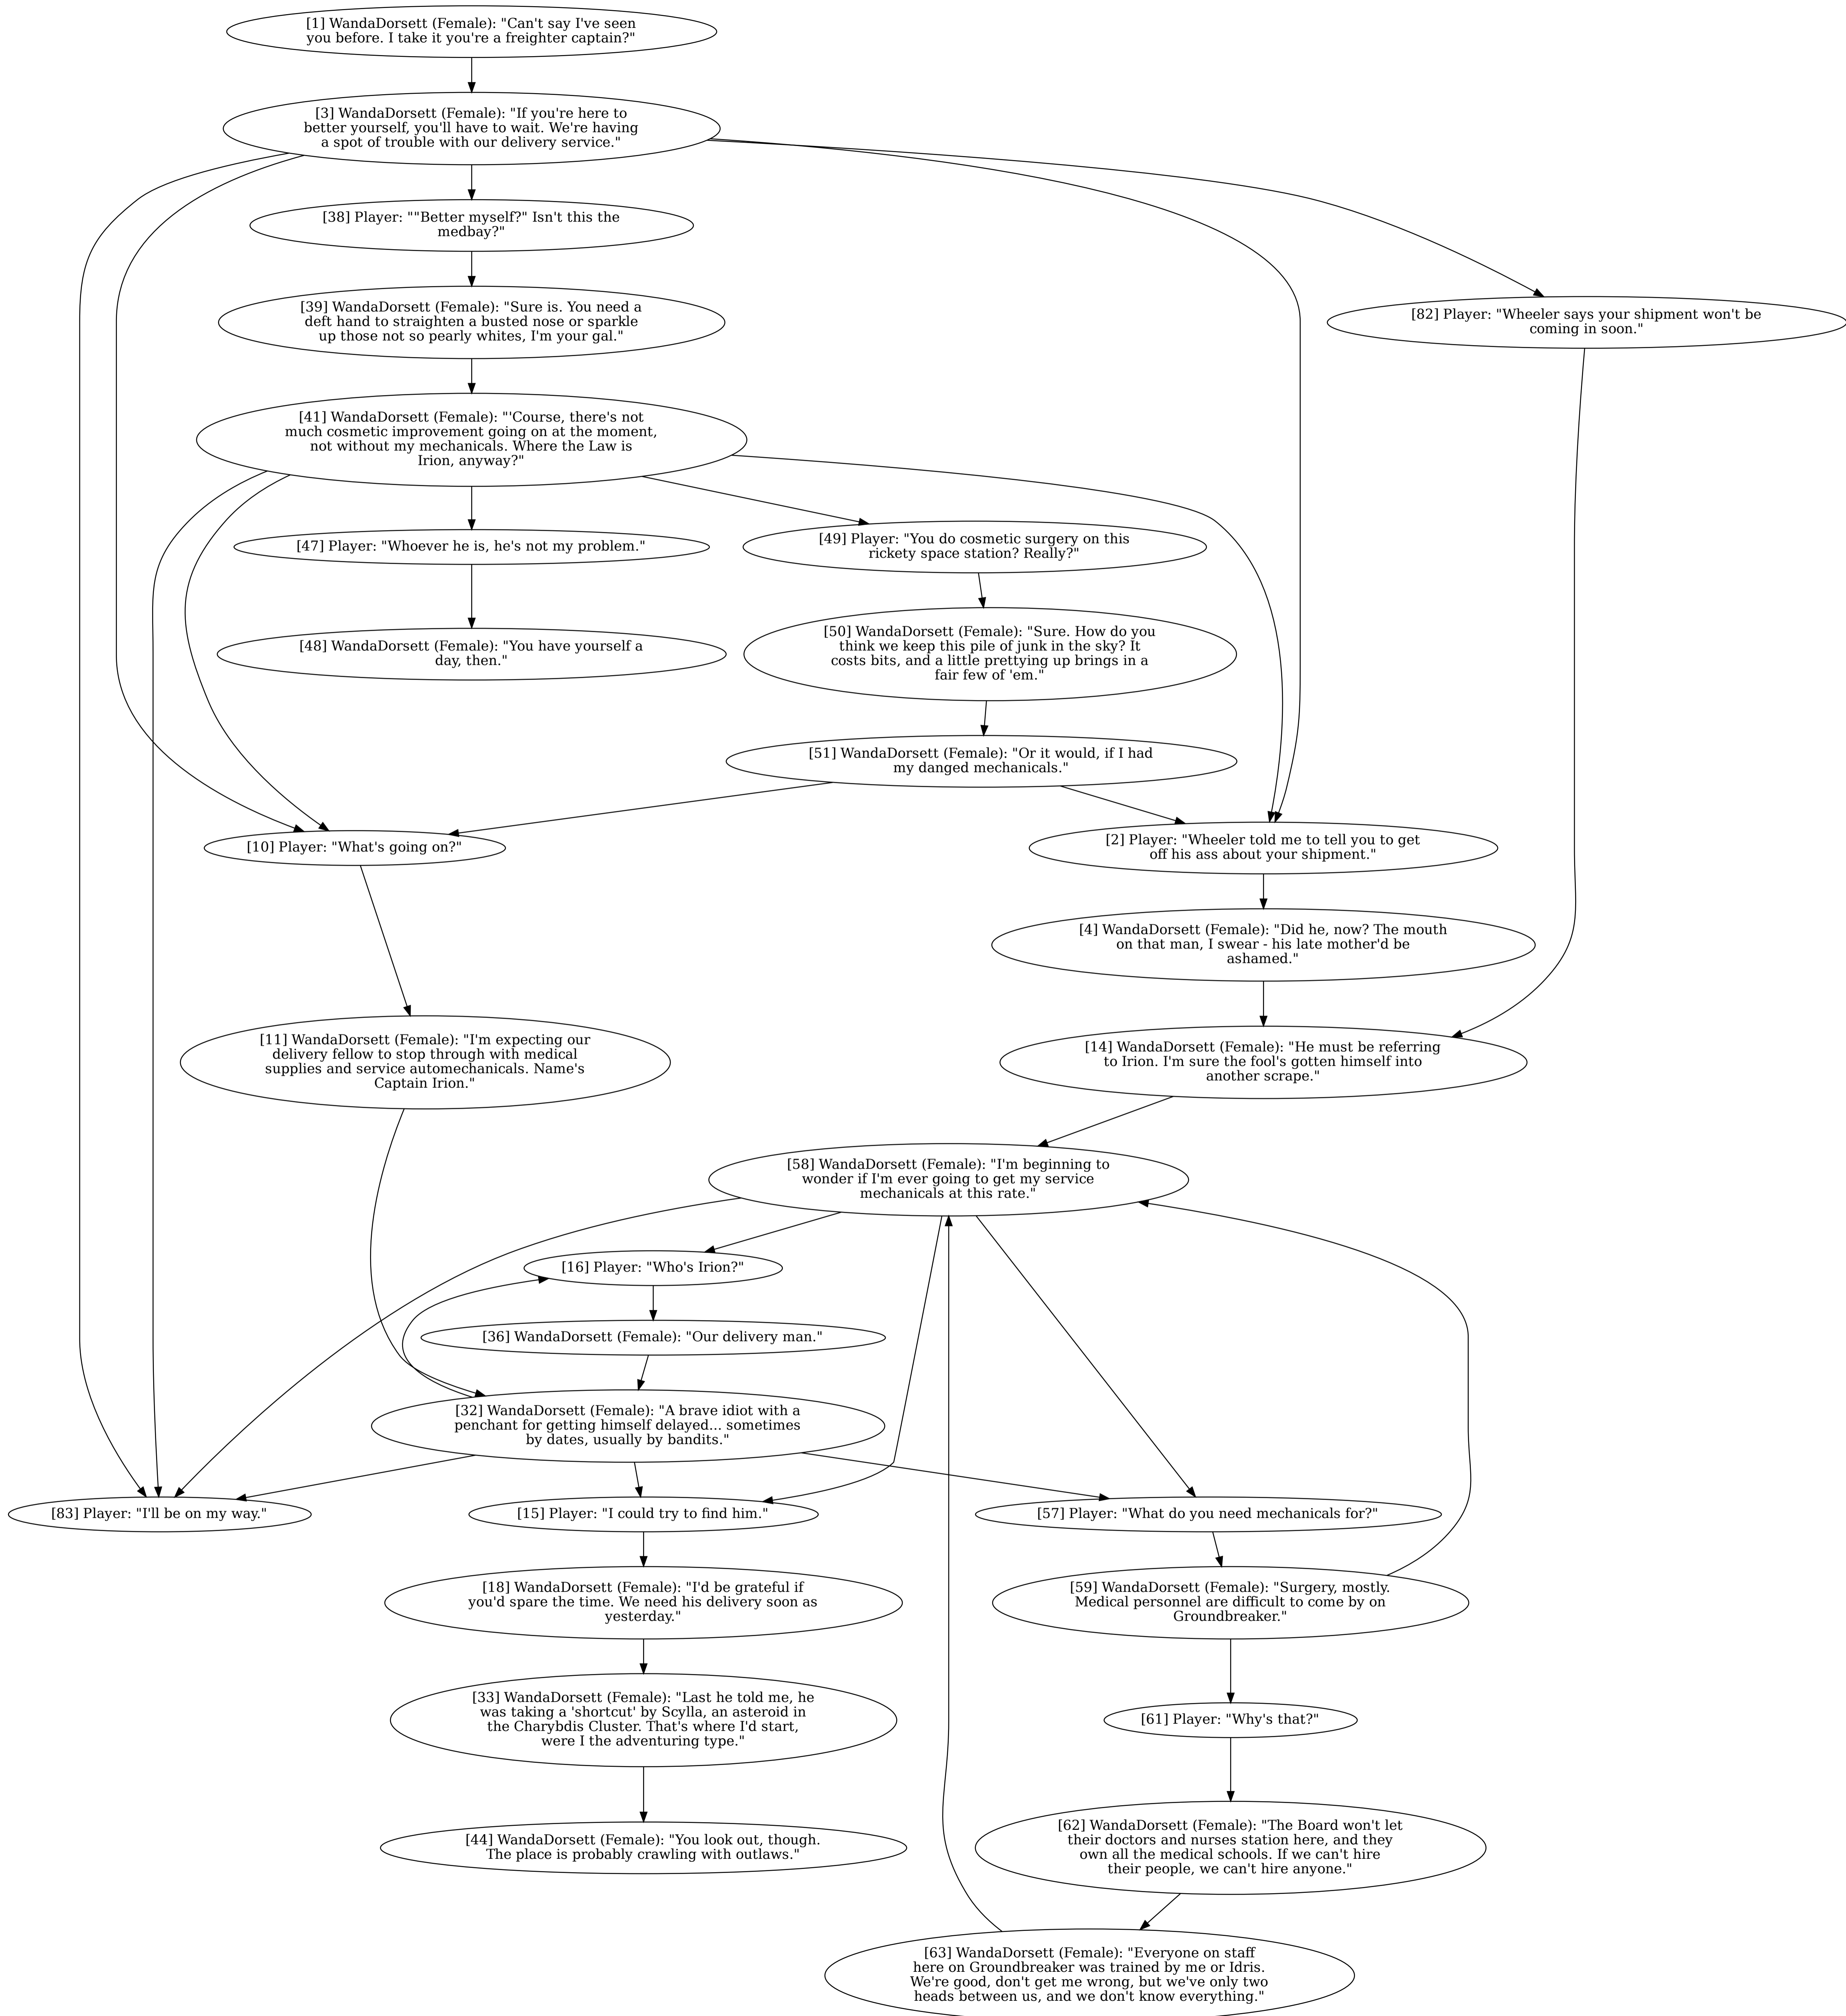

Supplement: software [file 2024.emnlp-main.520.software.zip]

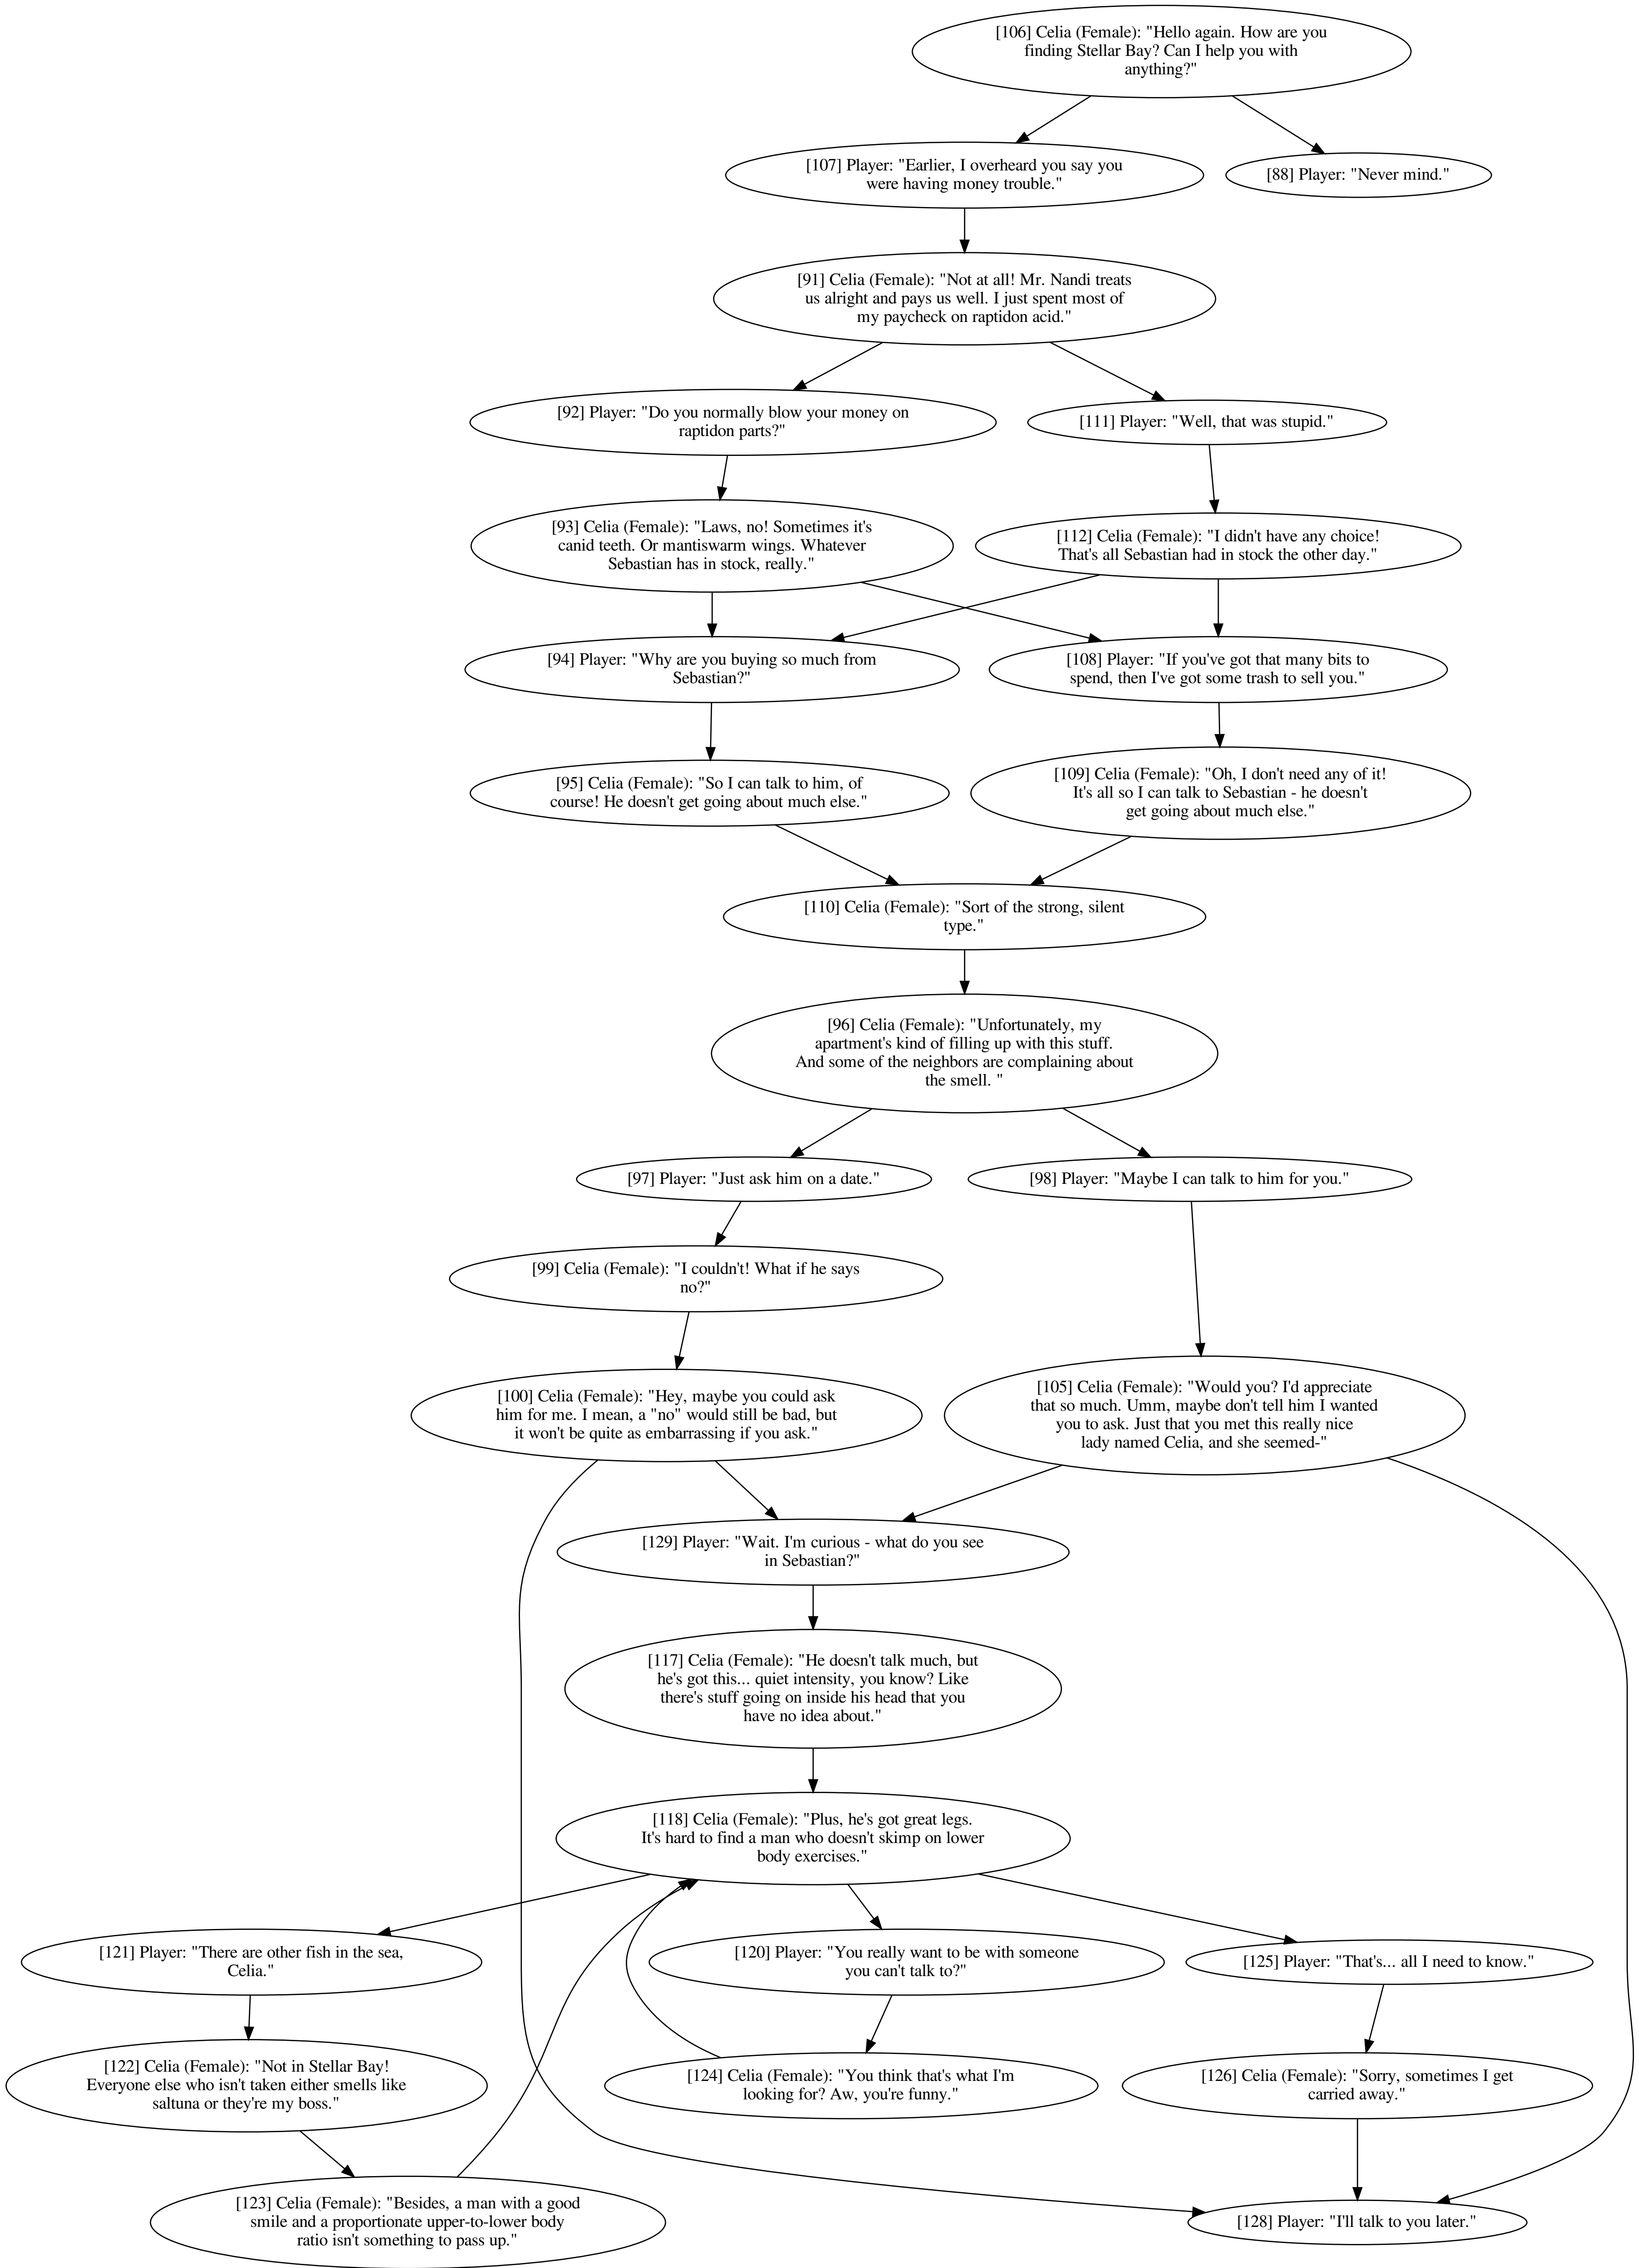

Supplement: software [file 2024.emnlp-main.520.software.zip]

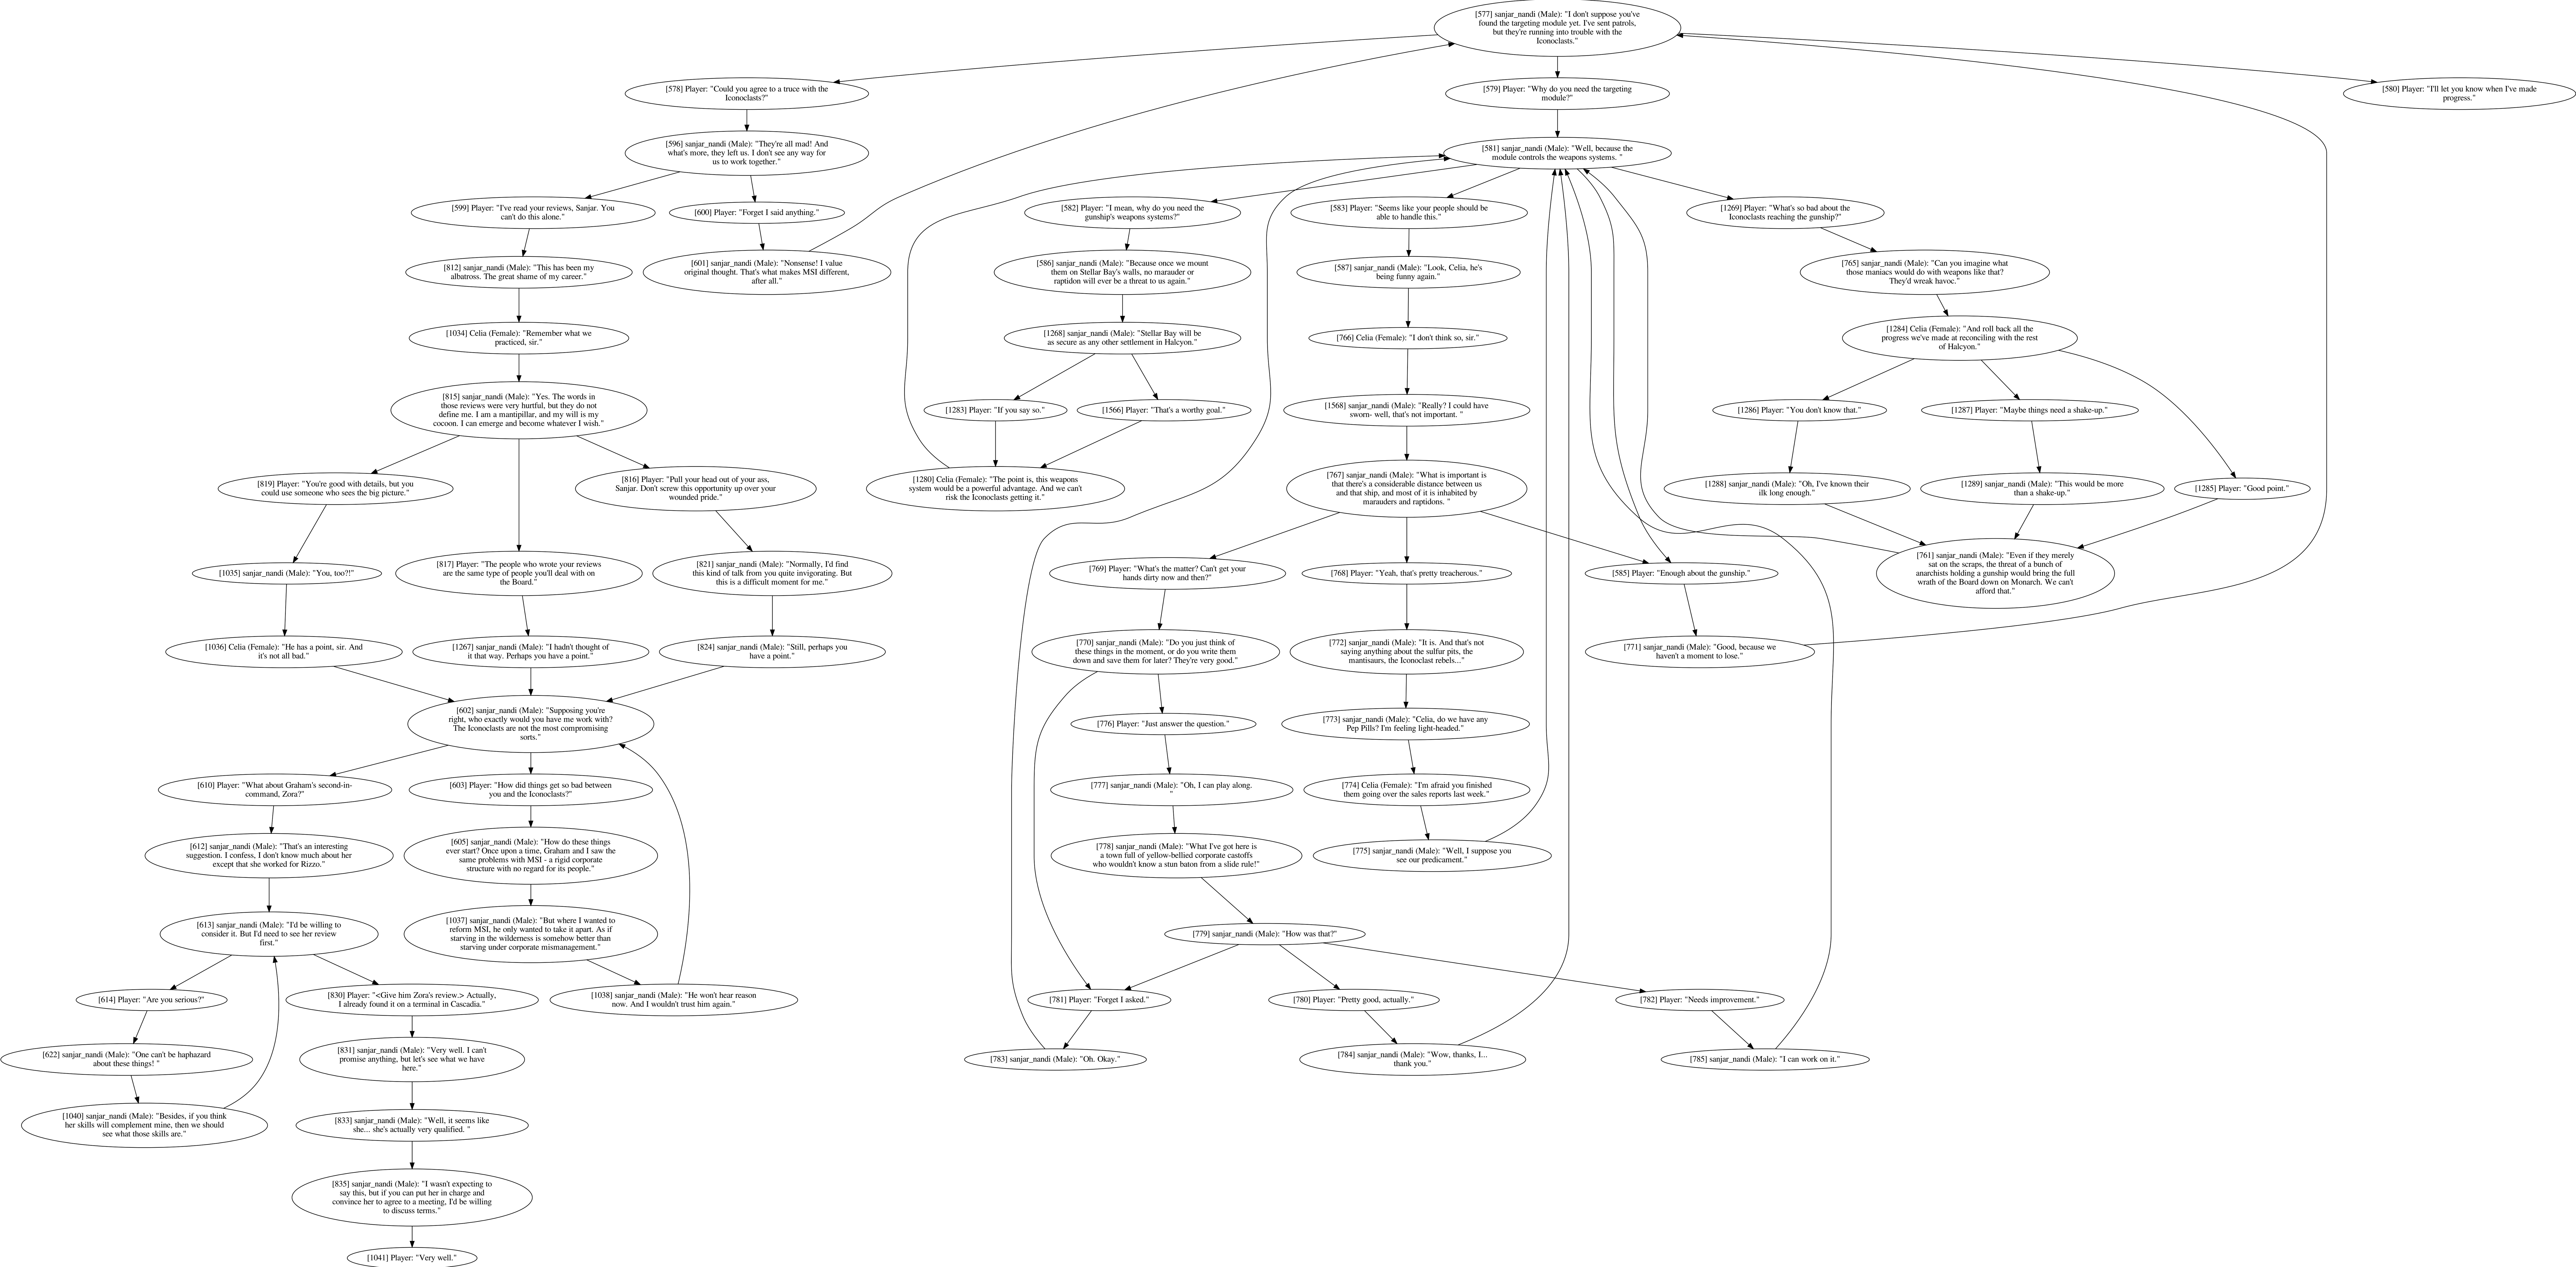

Supplement: software [file 2024.emnlp-main.520.software.zip]

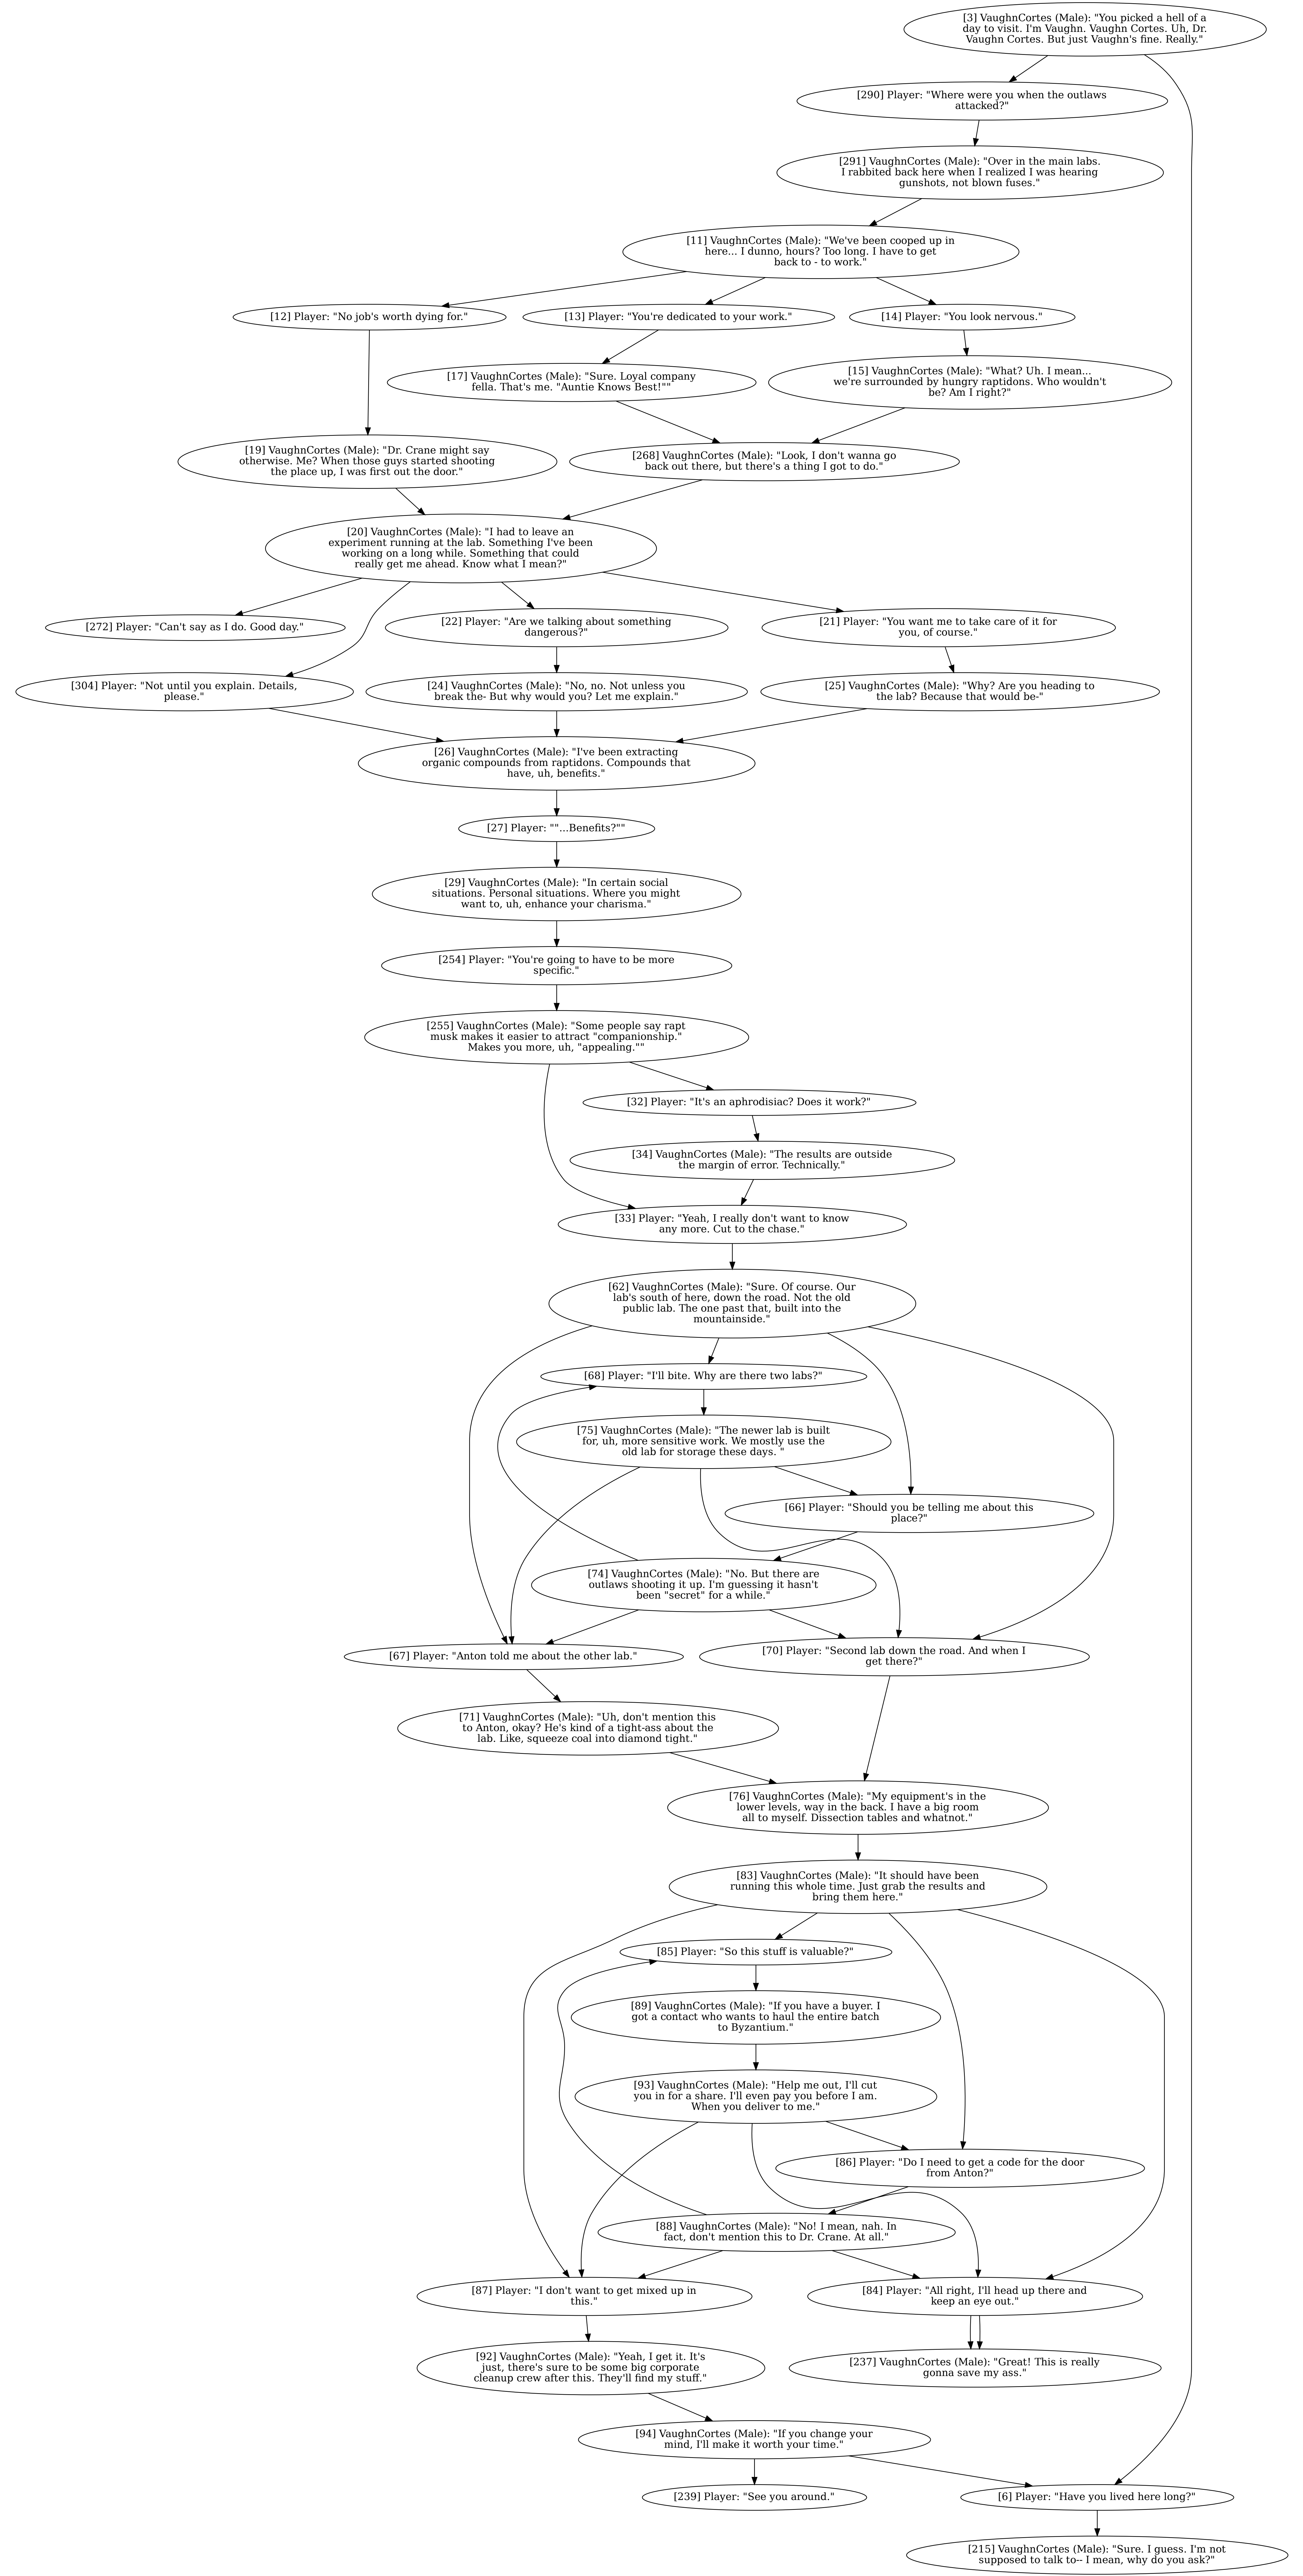

Supplement: software [file 2024.emnlp-main.520.software.zip]

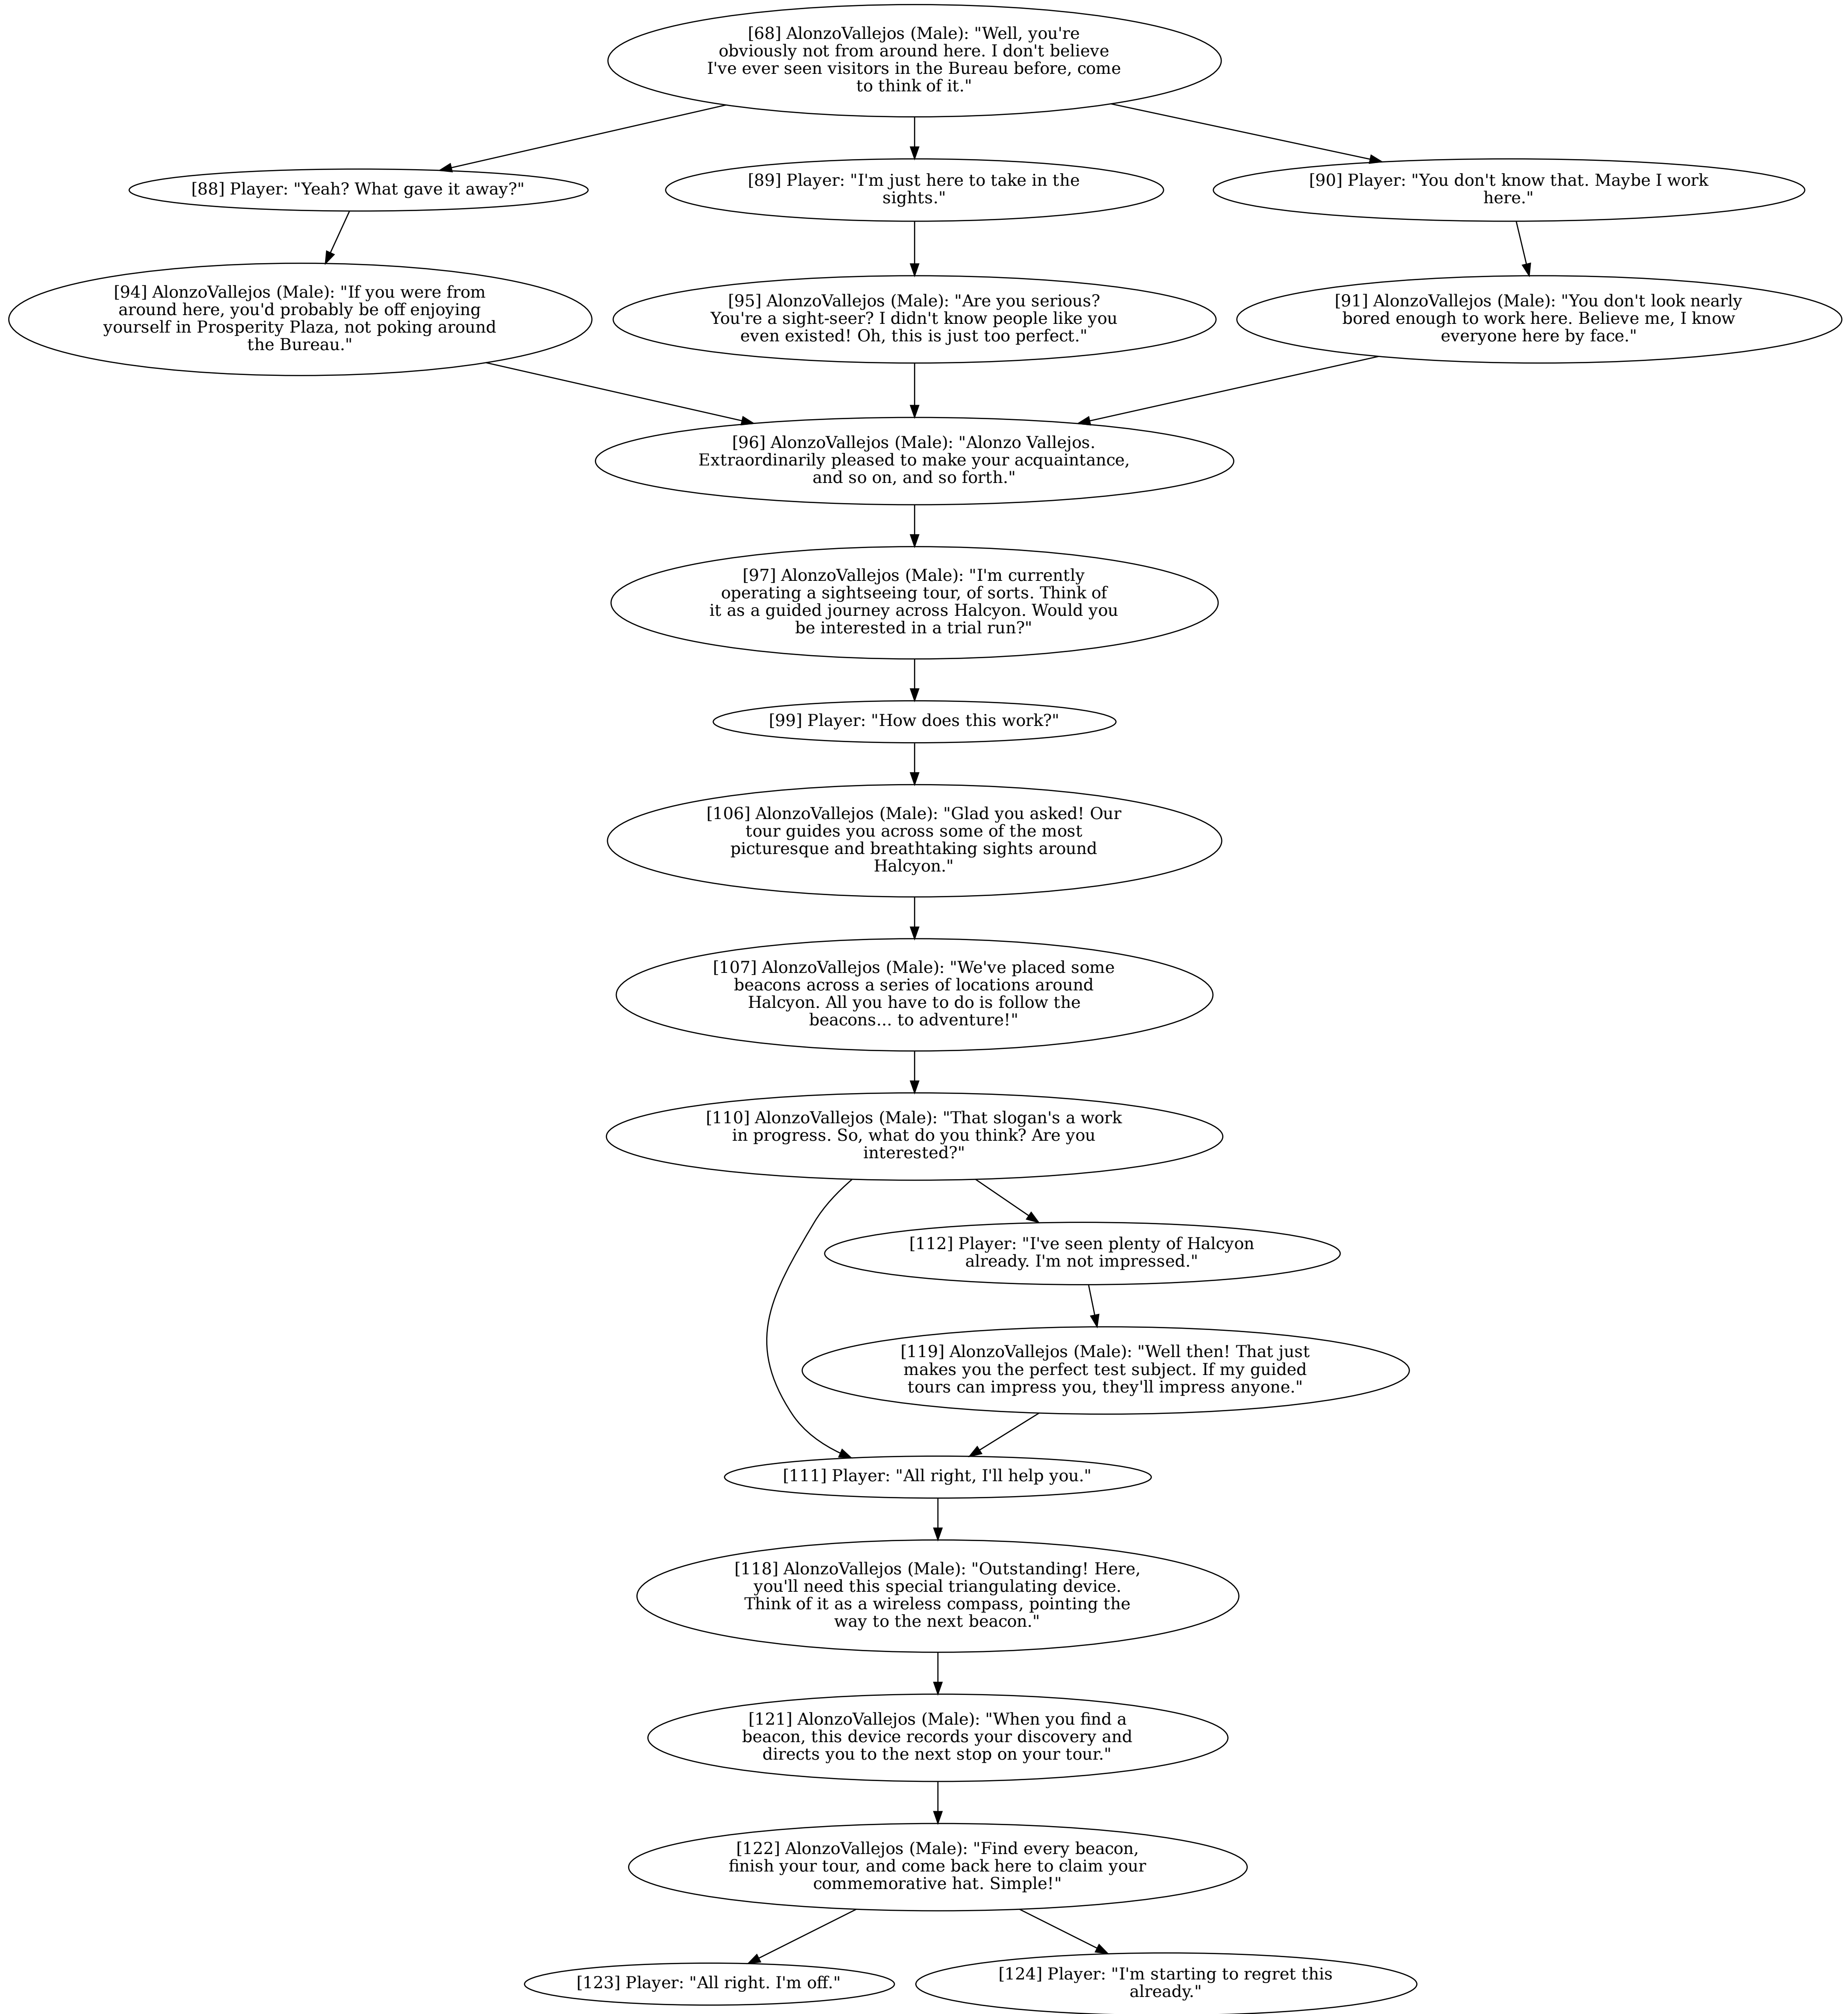

Supplement: software [file 2024.emnlp-main.520.software.zip]

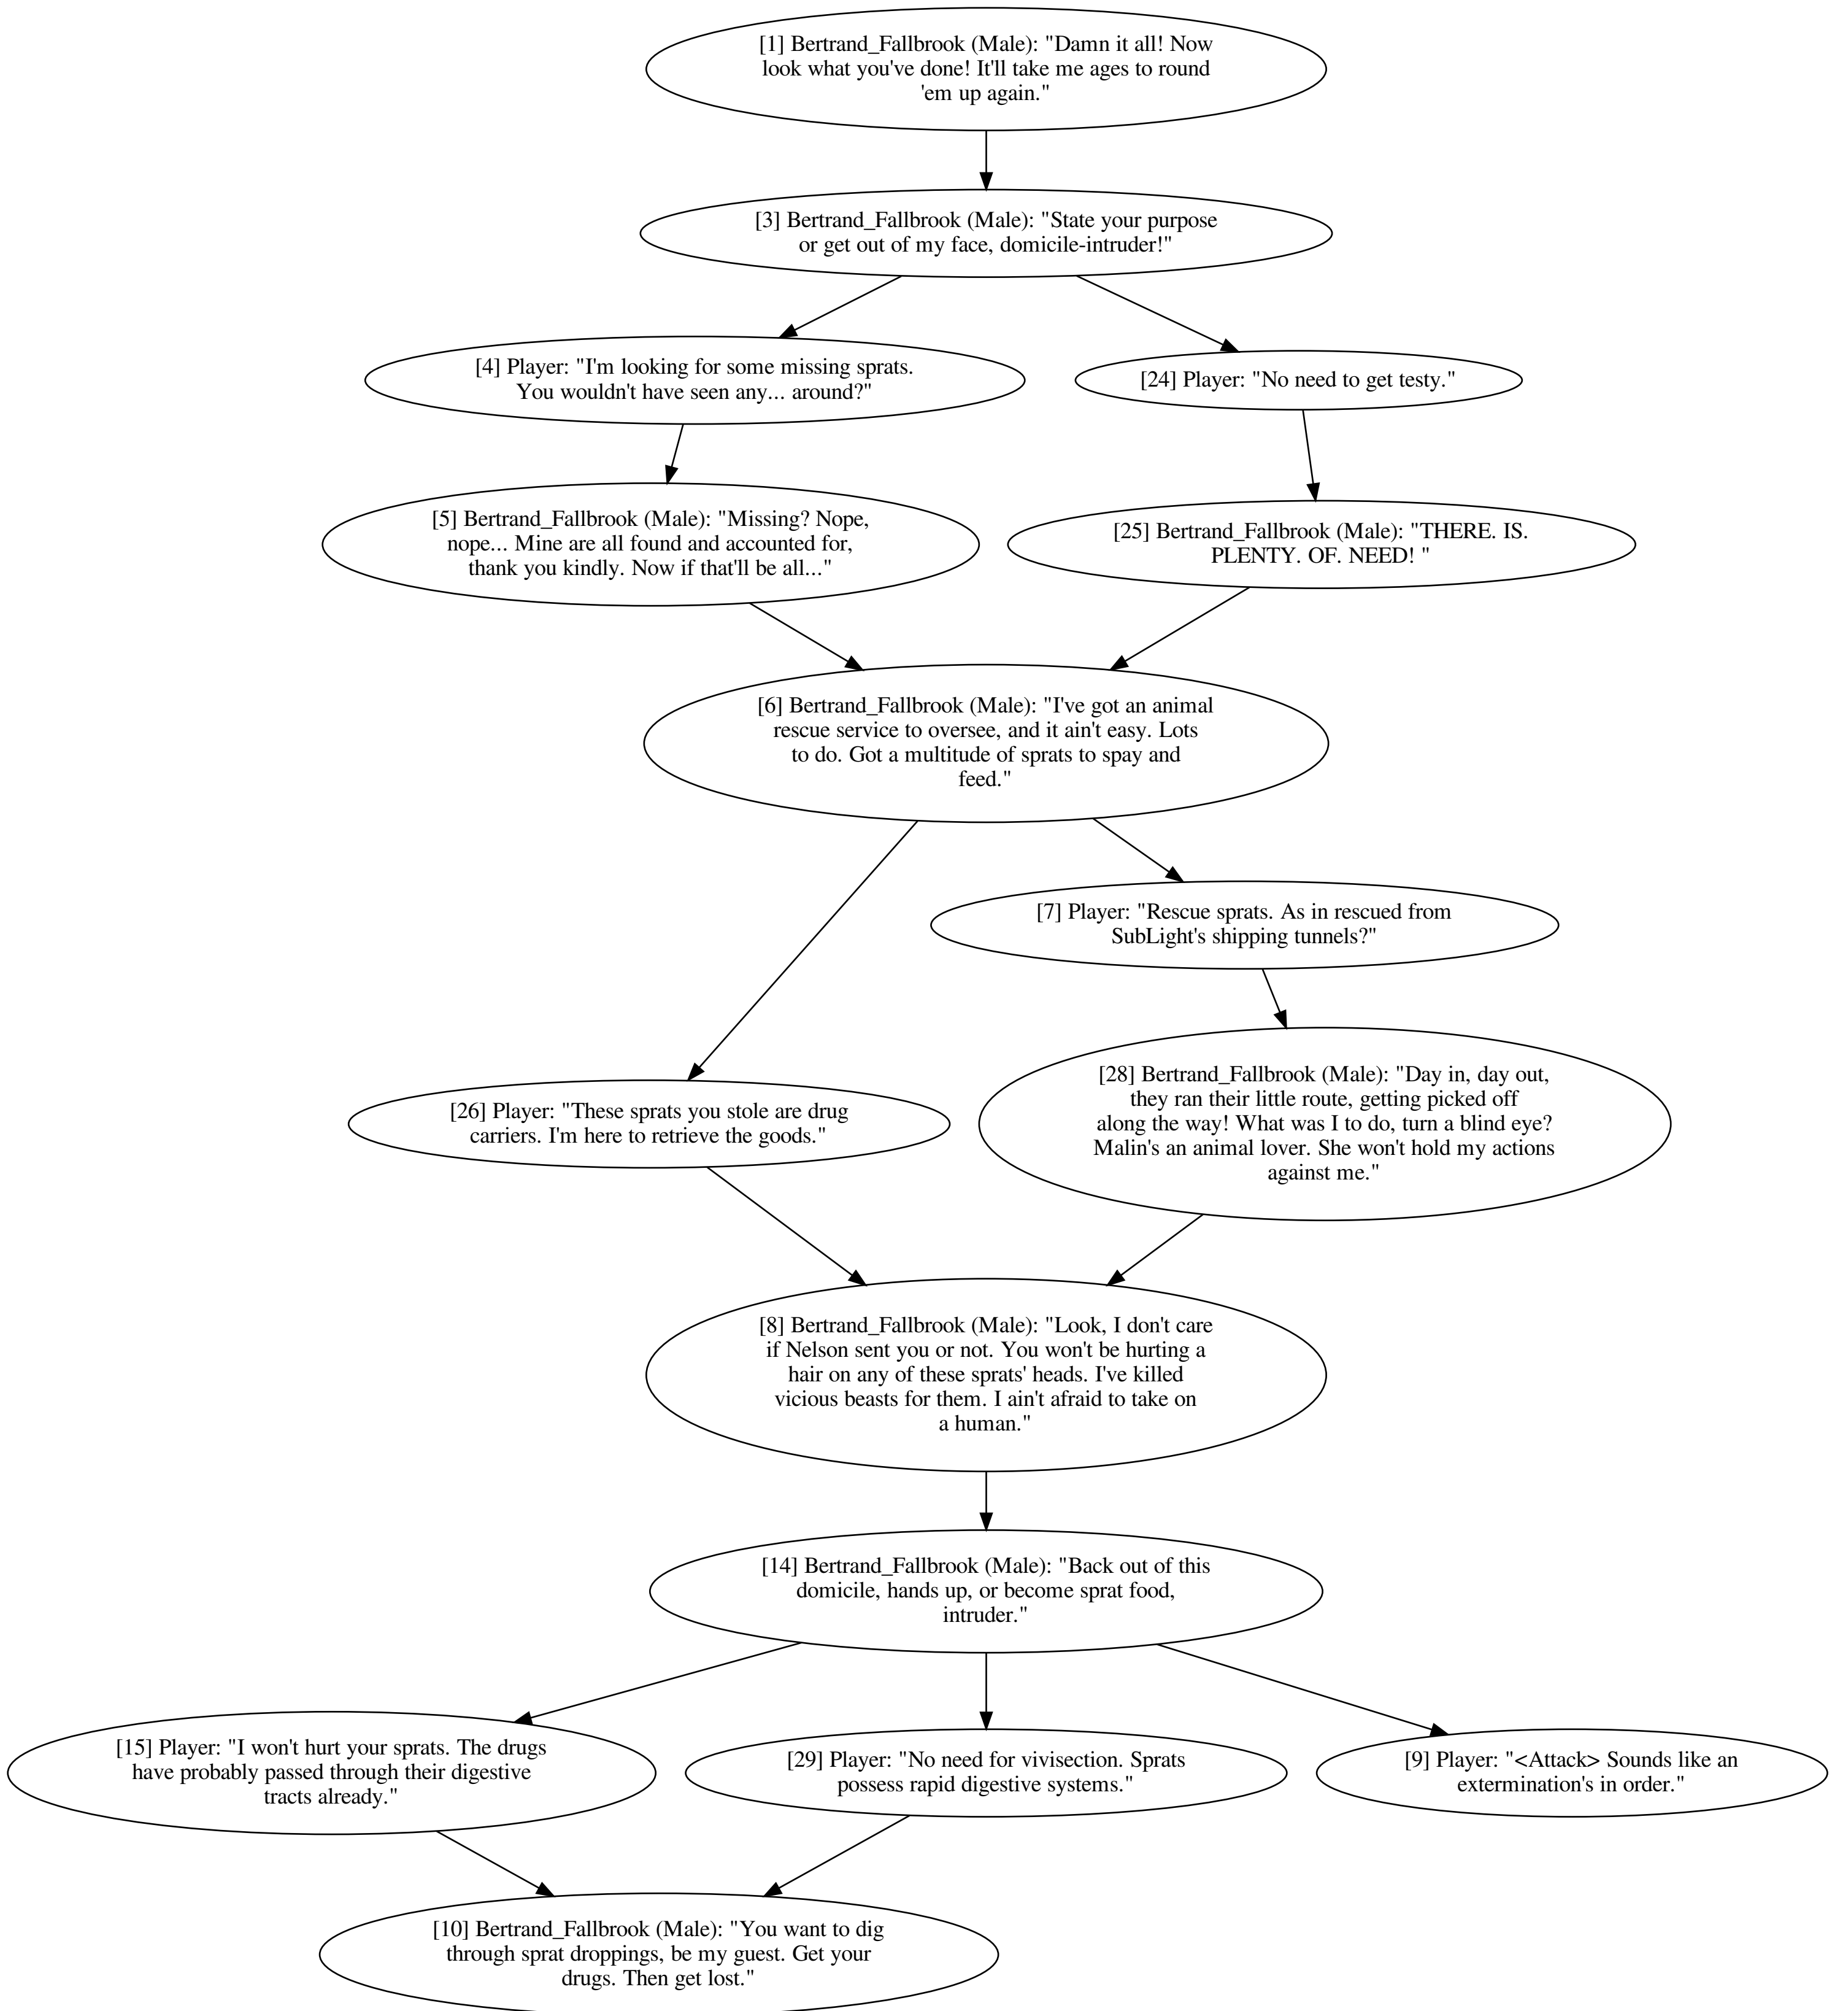

Supplement: software [file 2024.emnlp-main.520.software.zip]

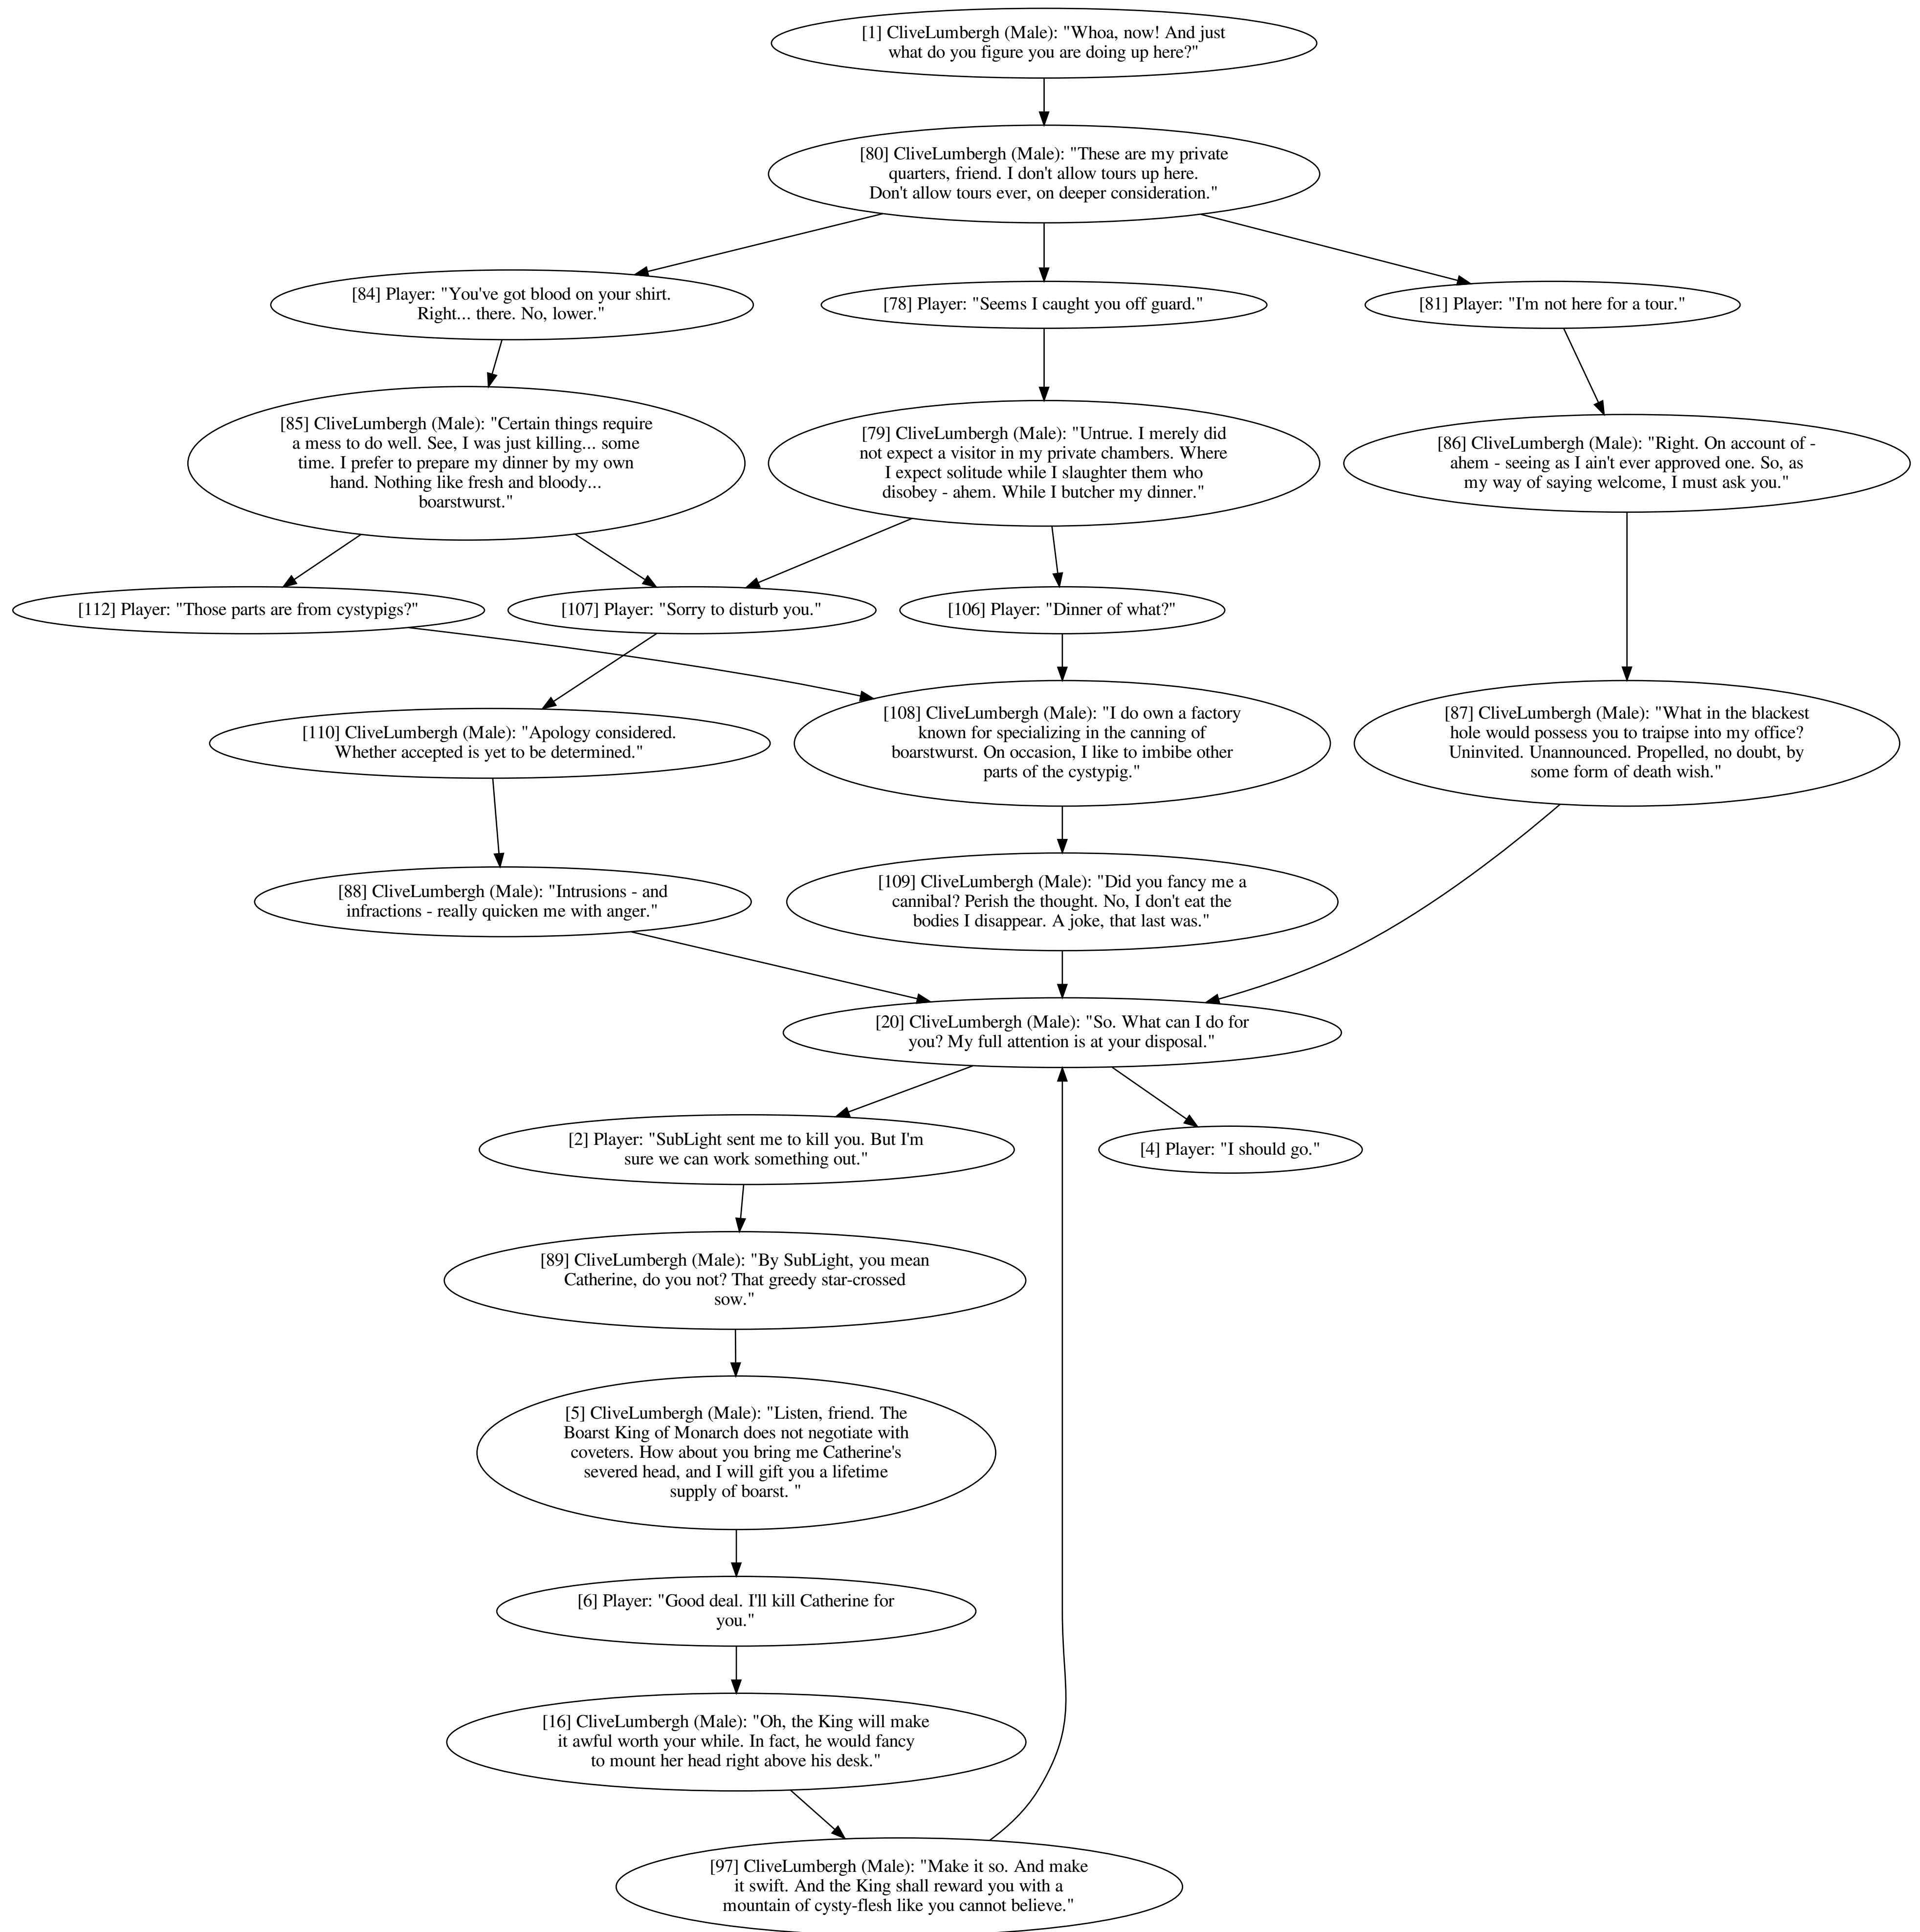

Supplement: software [file 2024.emnlp-main.520.software.zip]

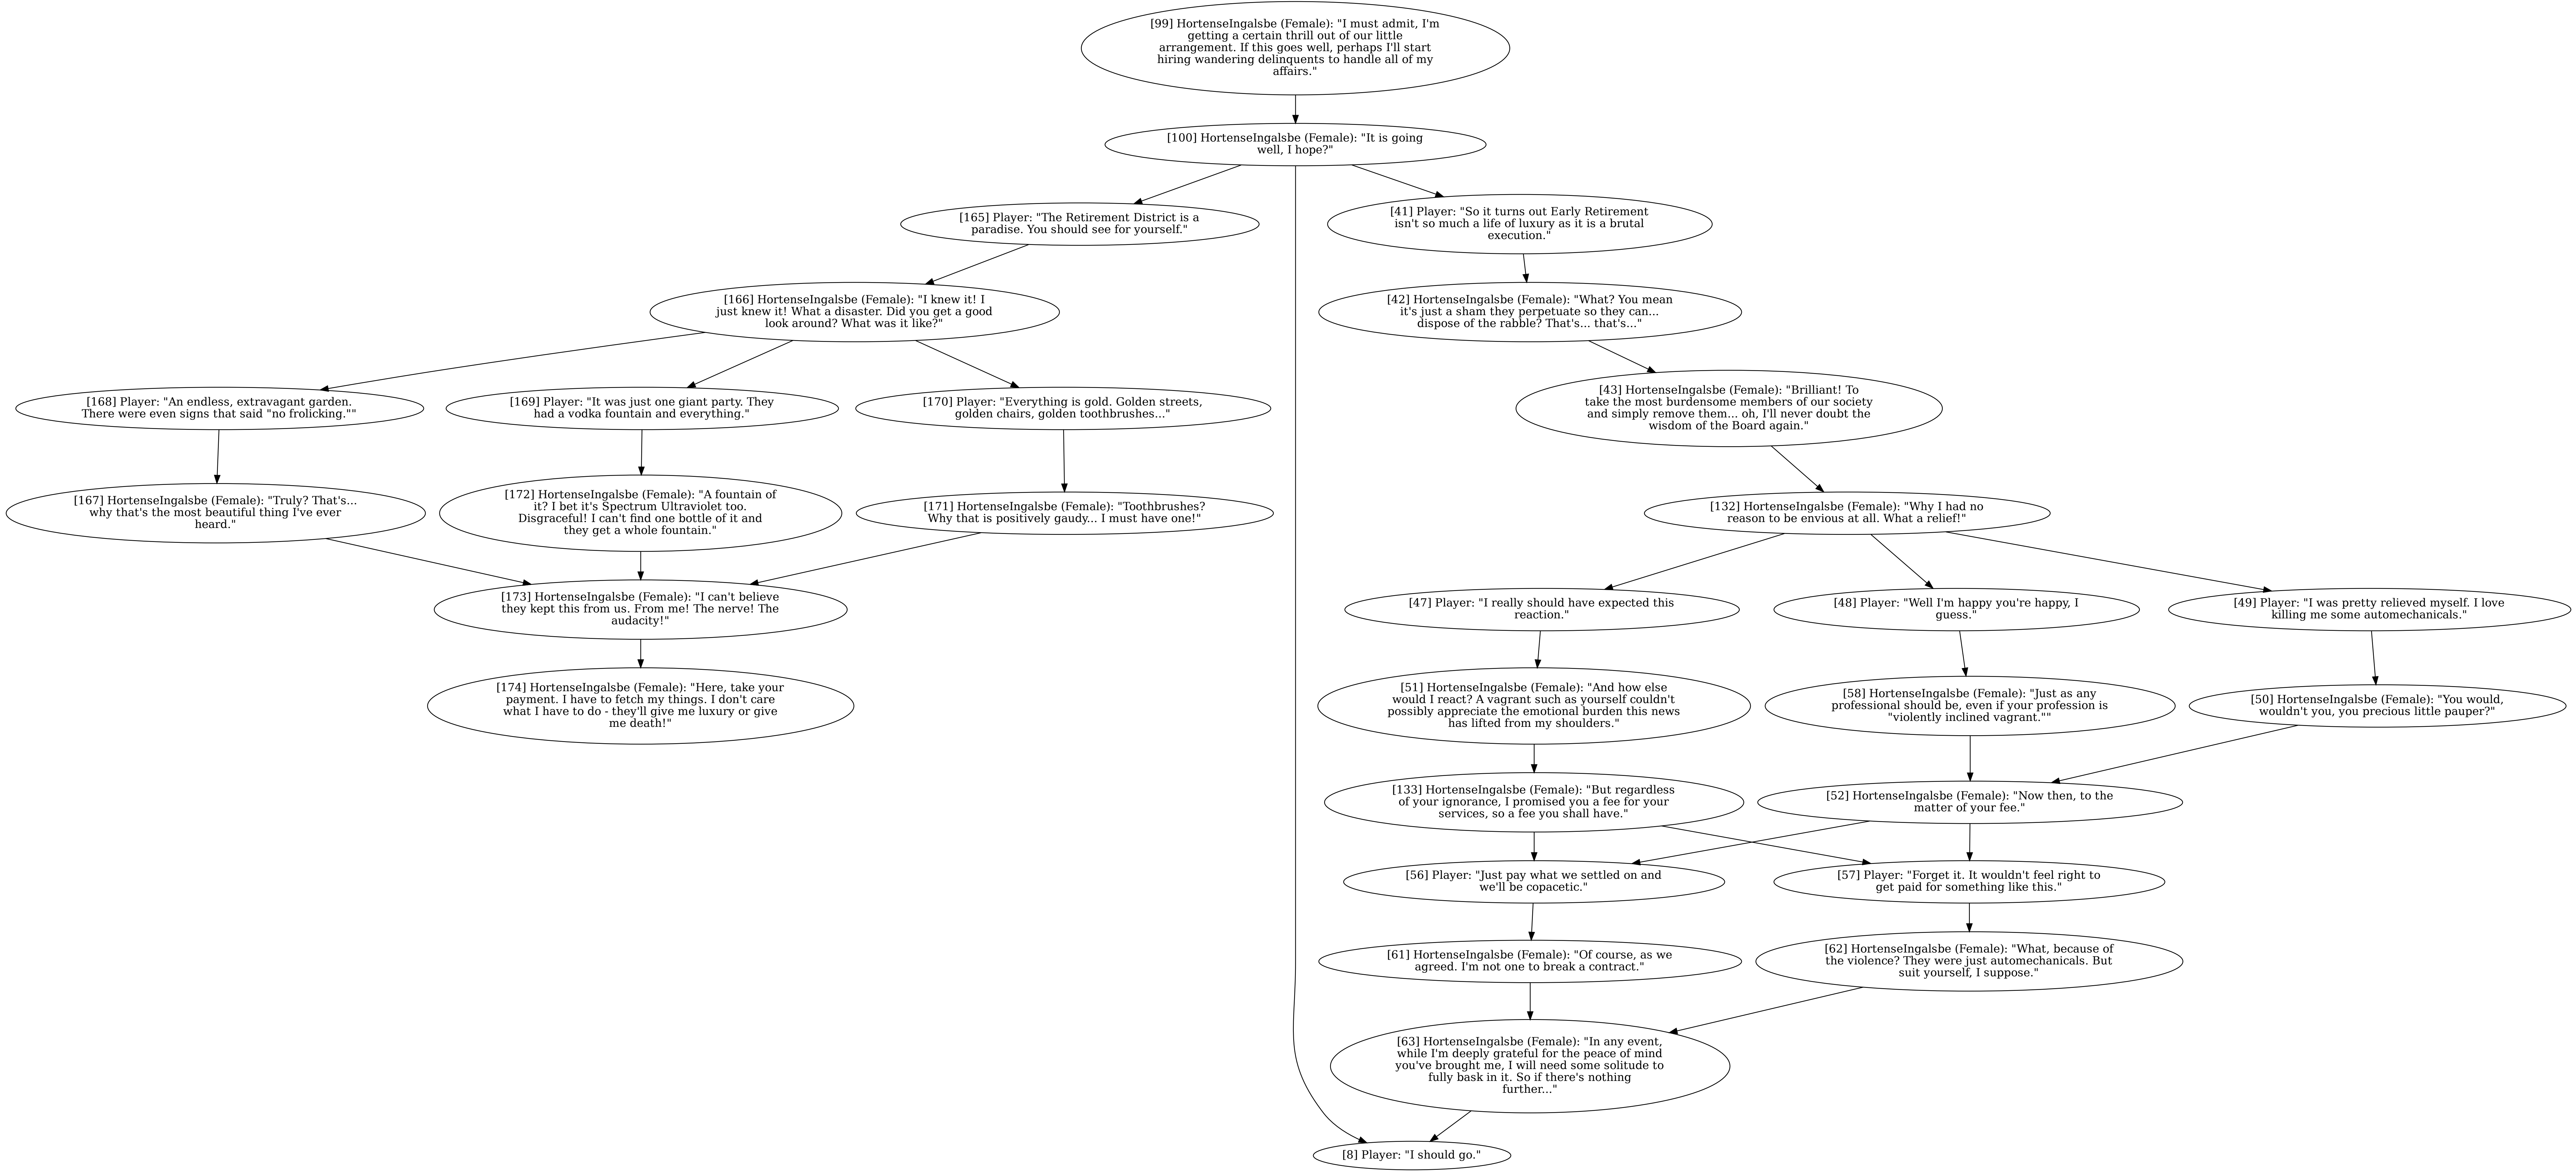

Supplement: software [file 2024.emnlp-main.520.software.zip]

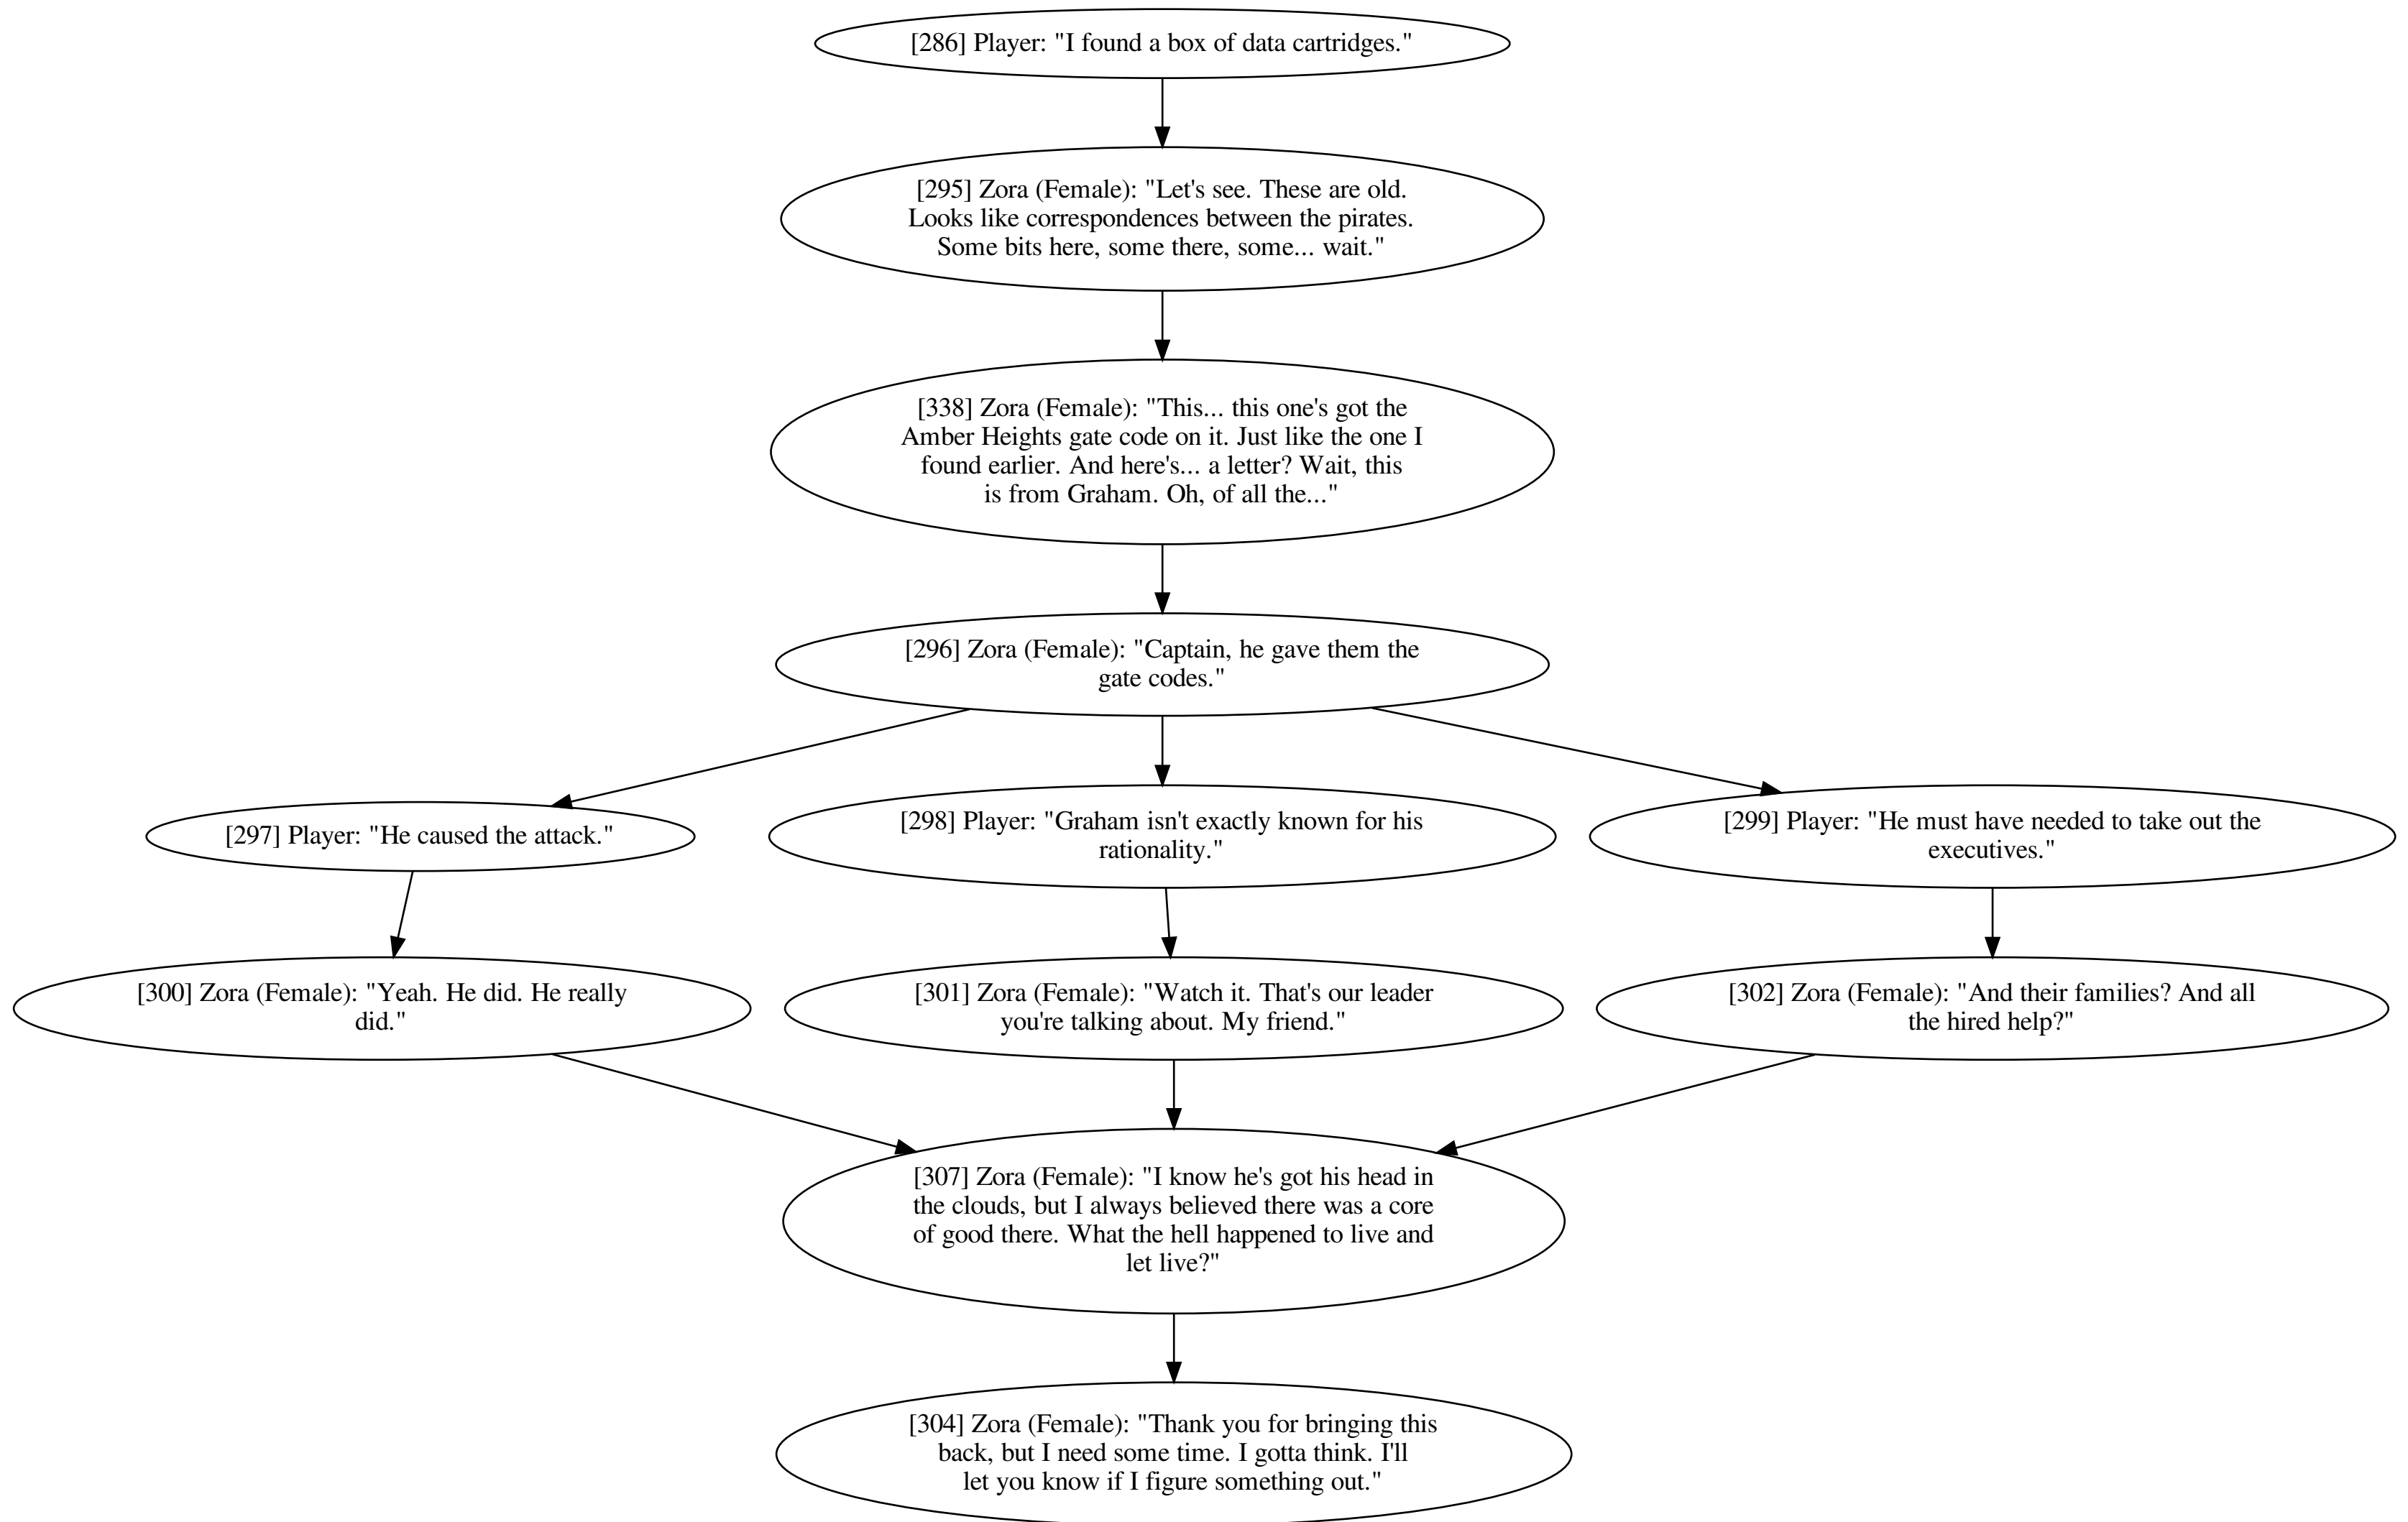

Supplement: software [file 2024.emnlp-main.520.software.zip]

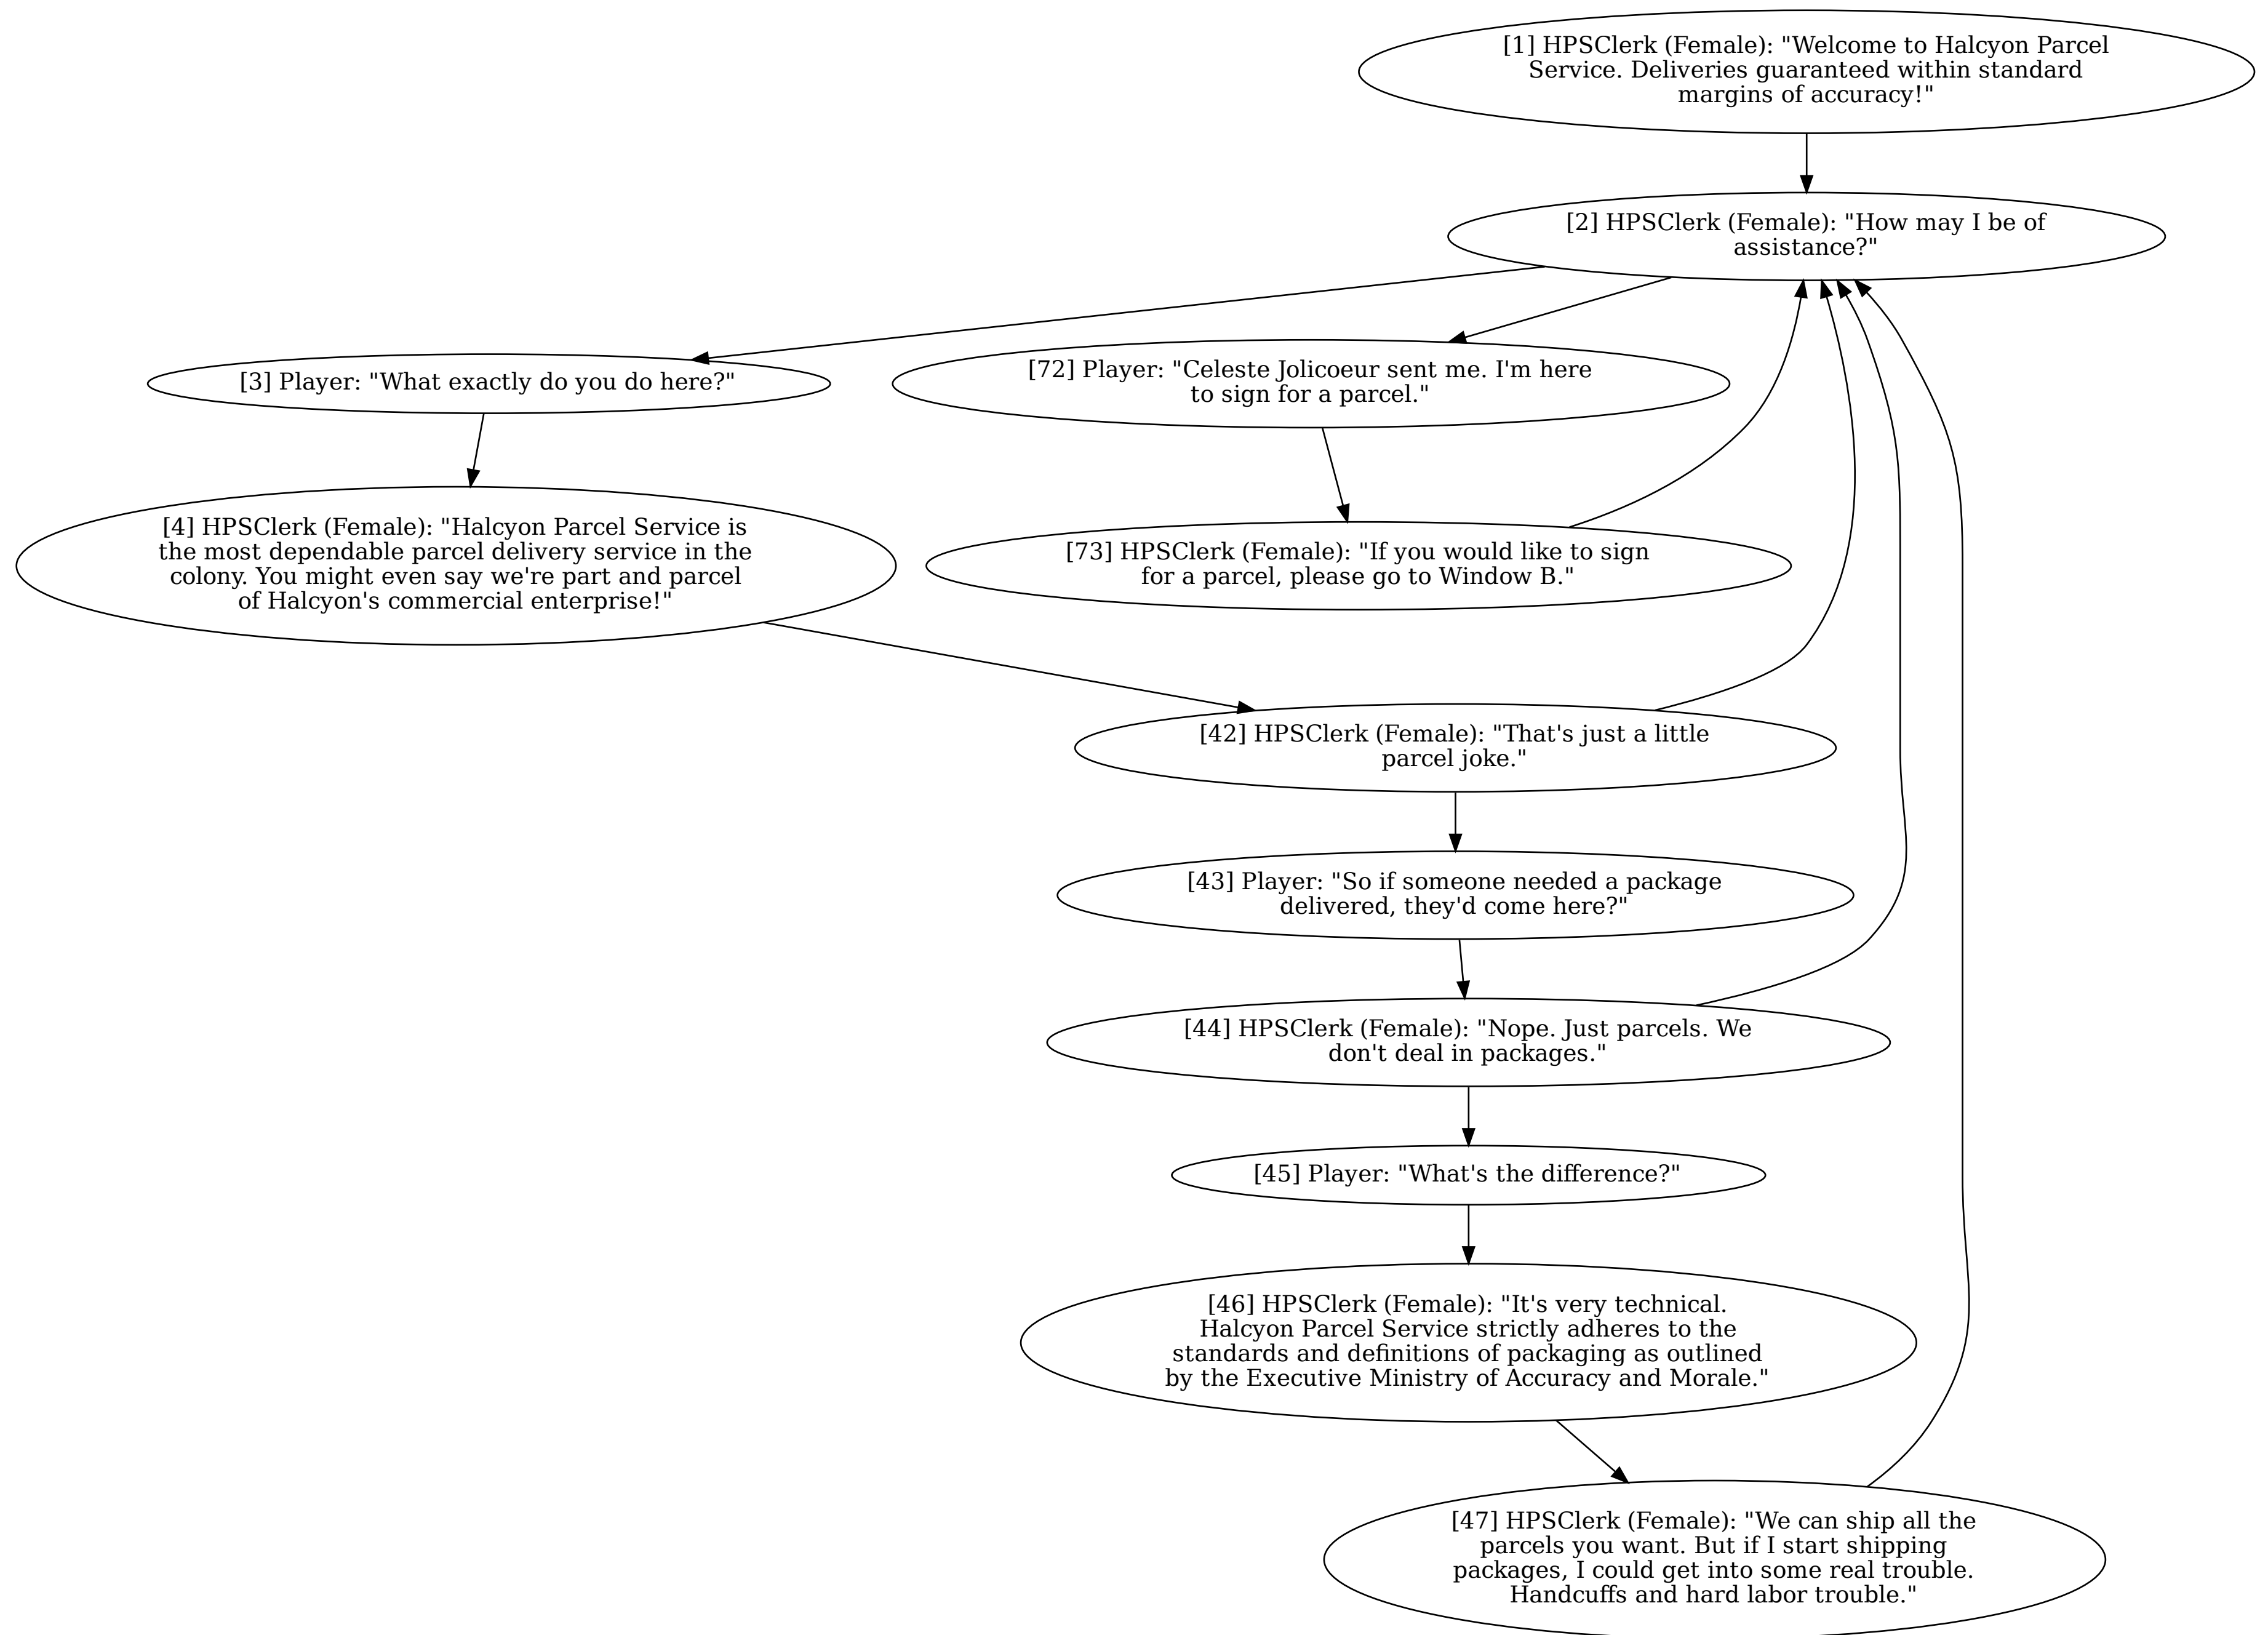

Supplement: software [file 2024.emnlp-main.520.software.zip]

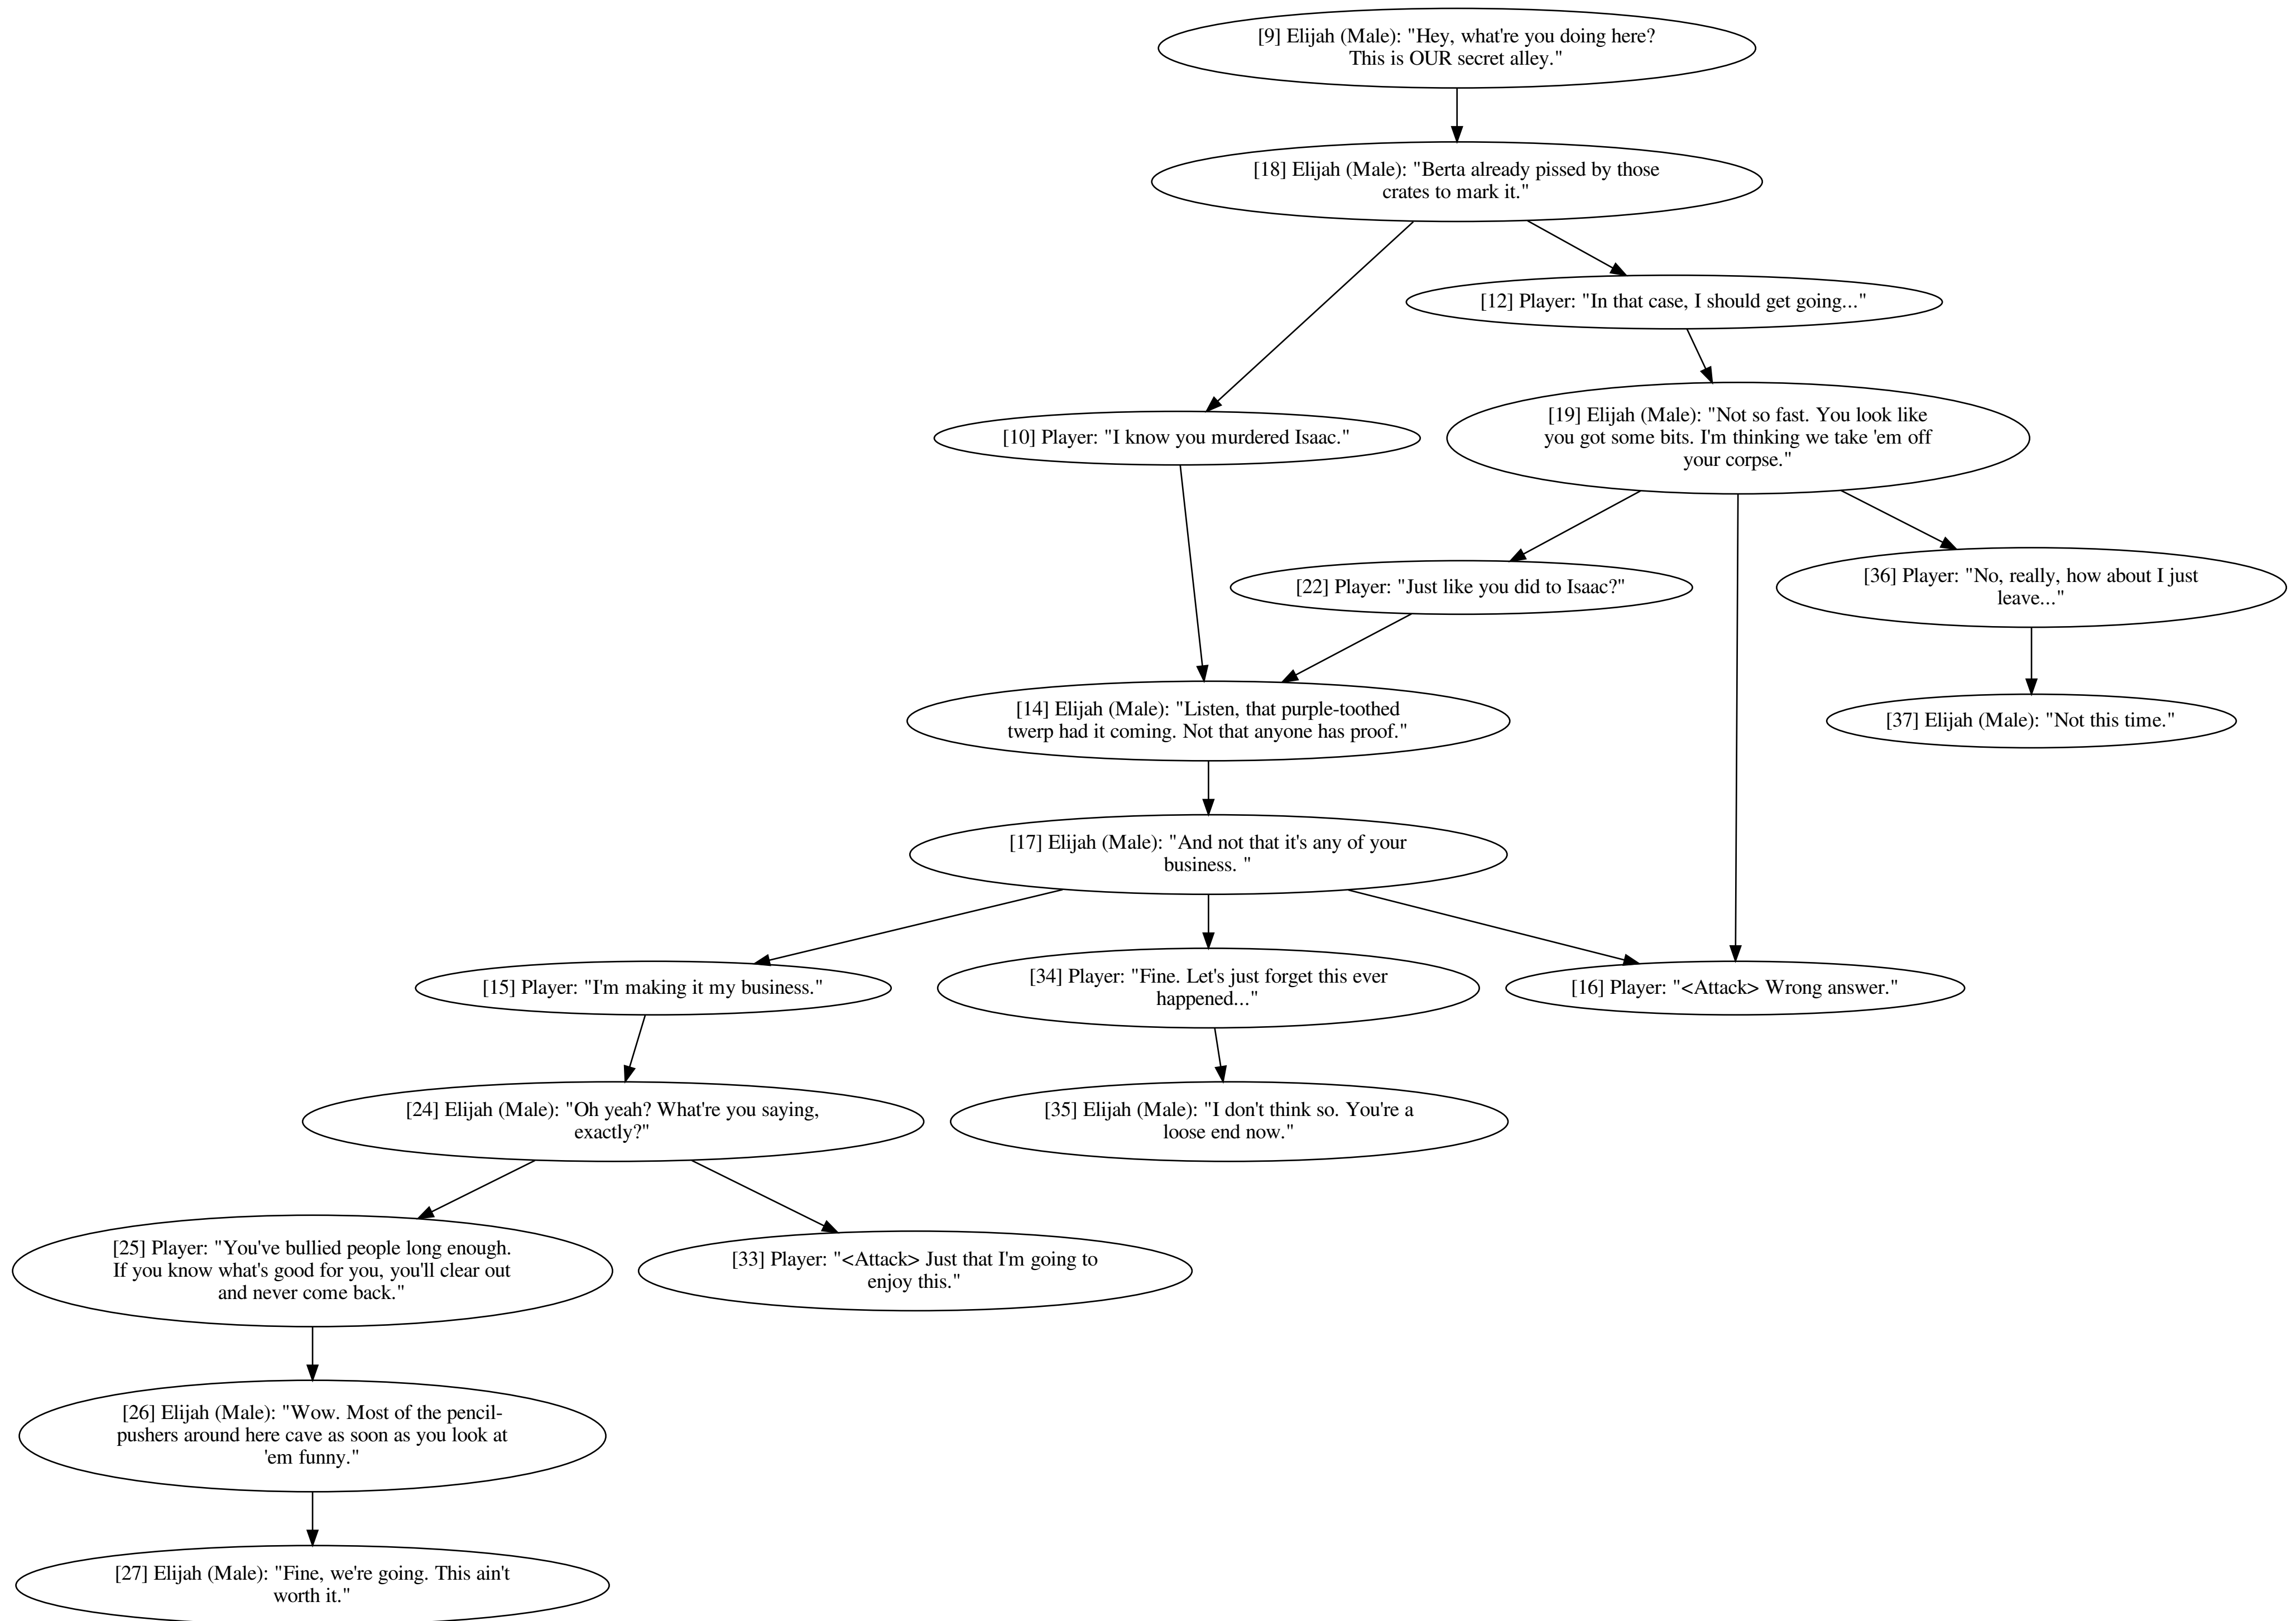

Supplement: software [file 2024.emnlp-main.520.software.zip]

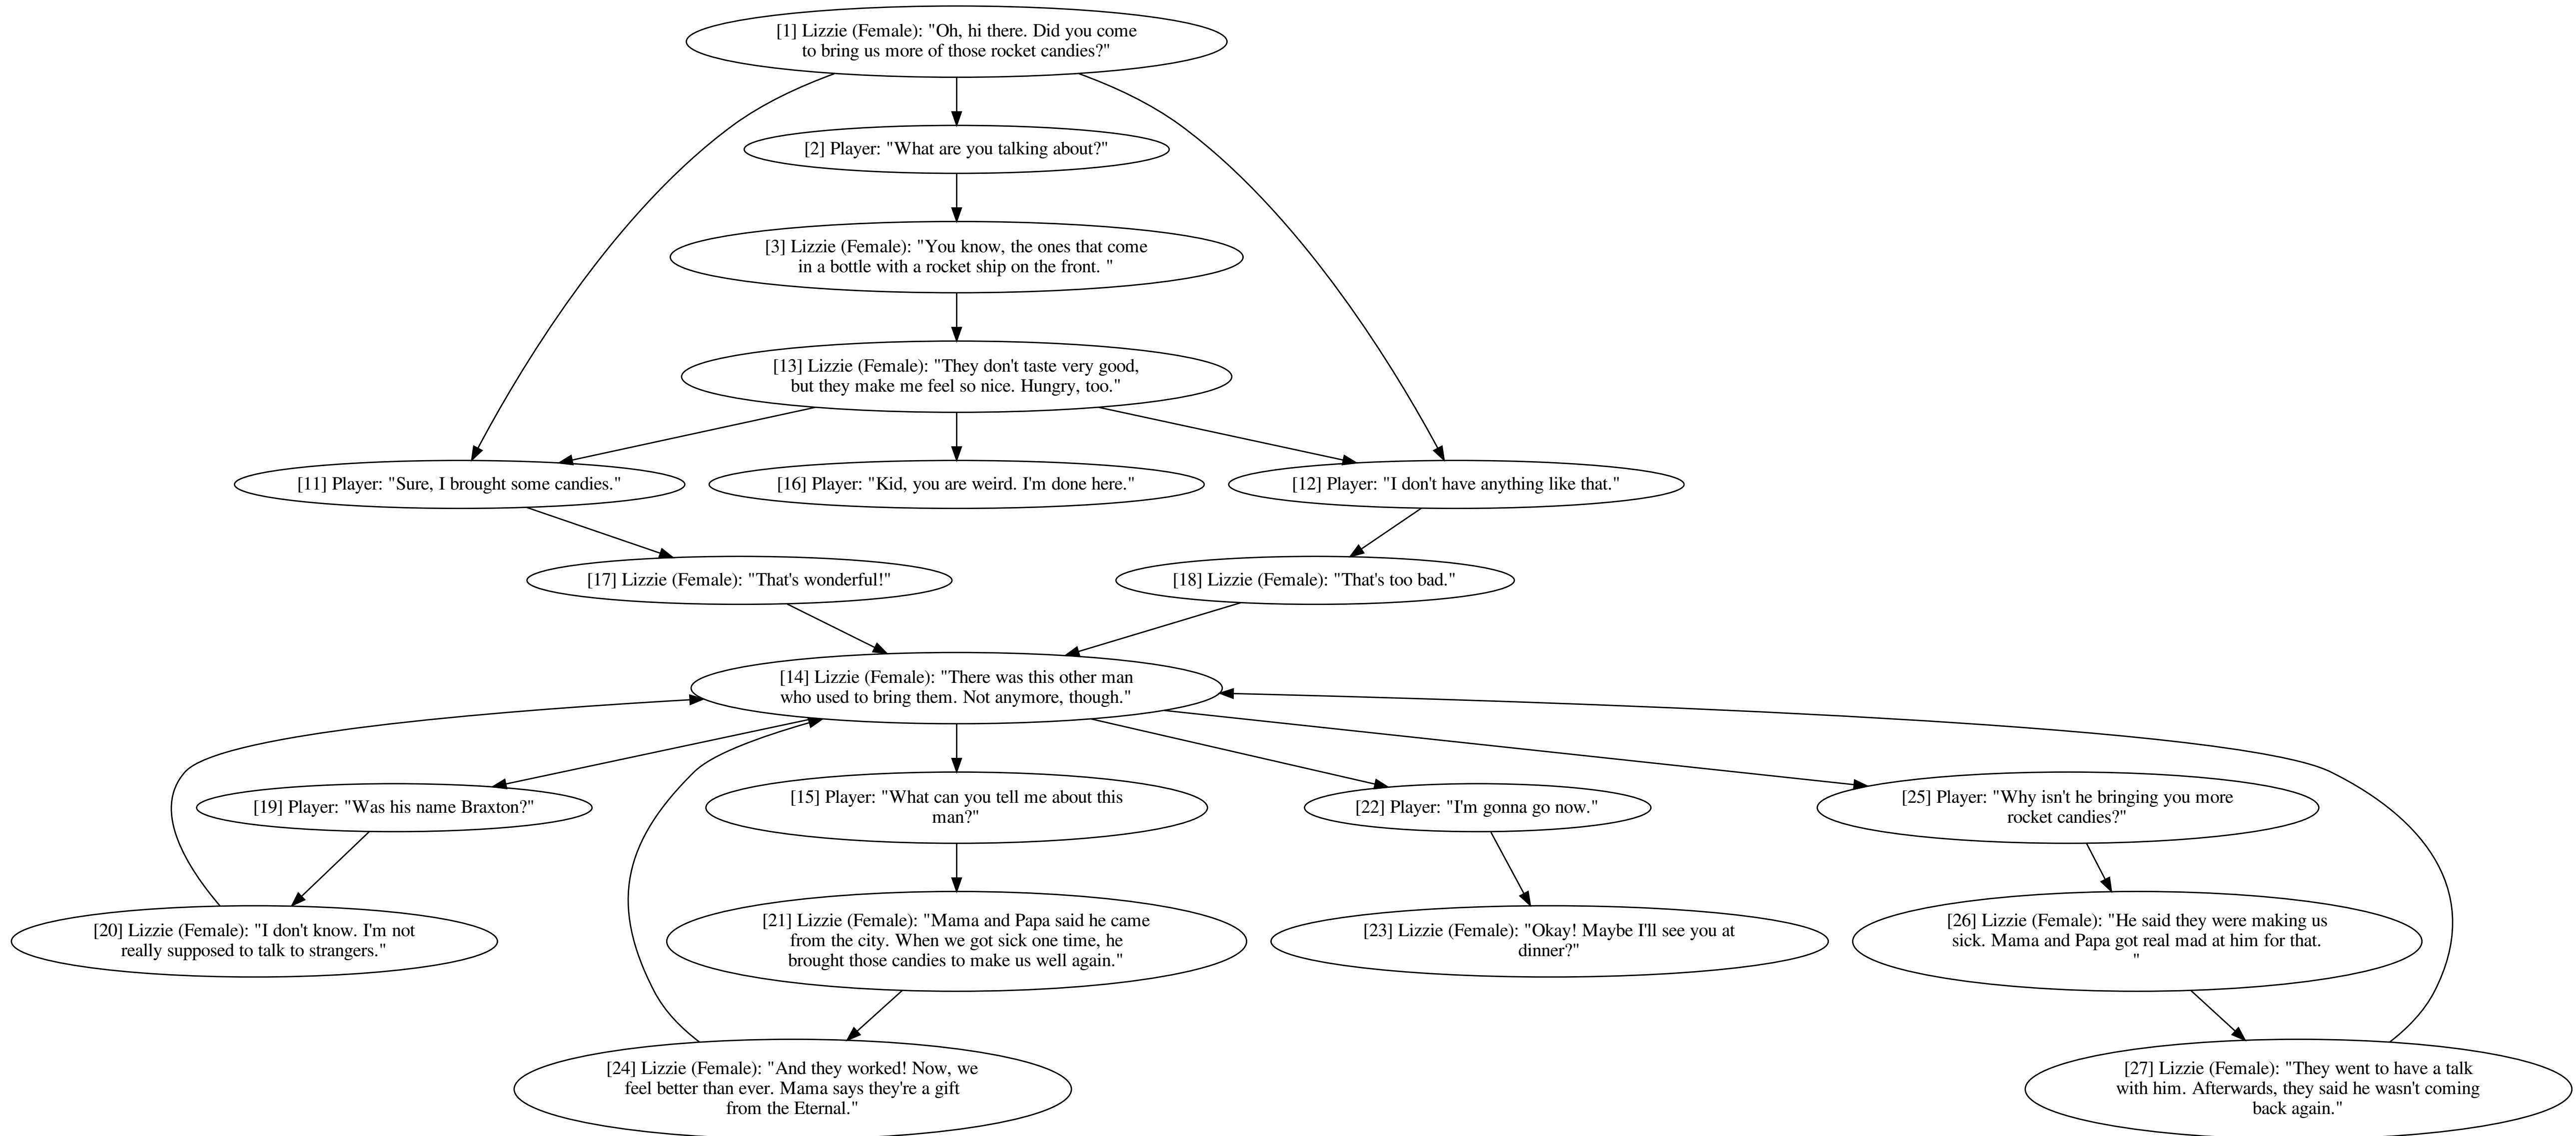

Supplement: software [file 2024.emnlp-main.520.software.zip]

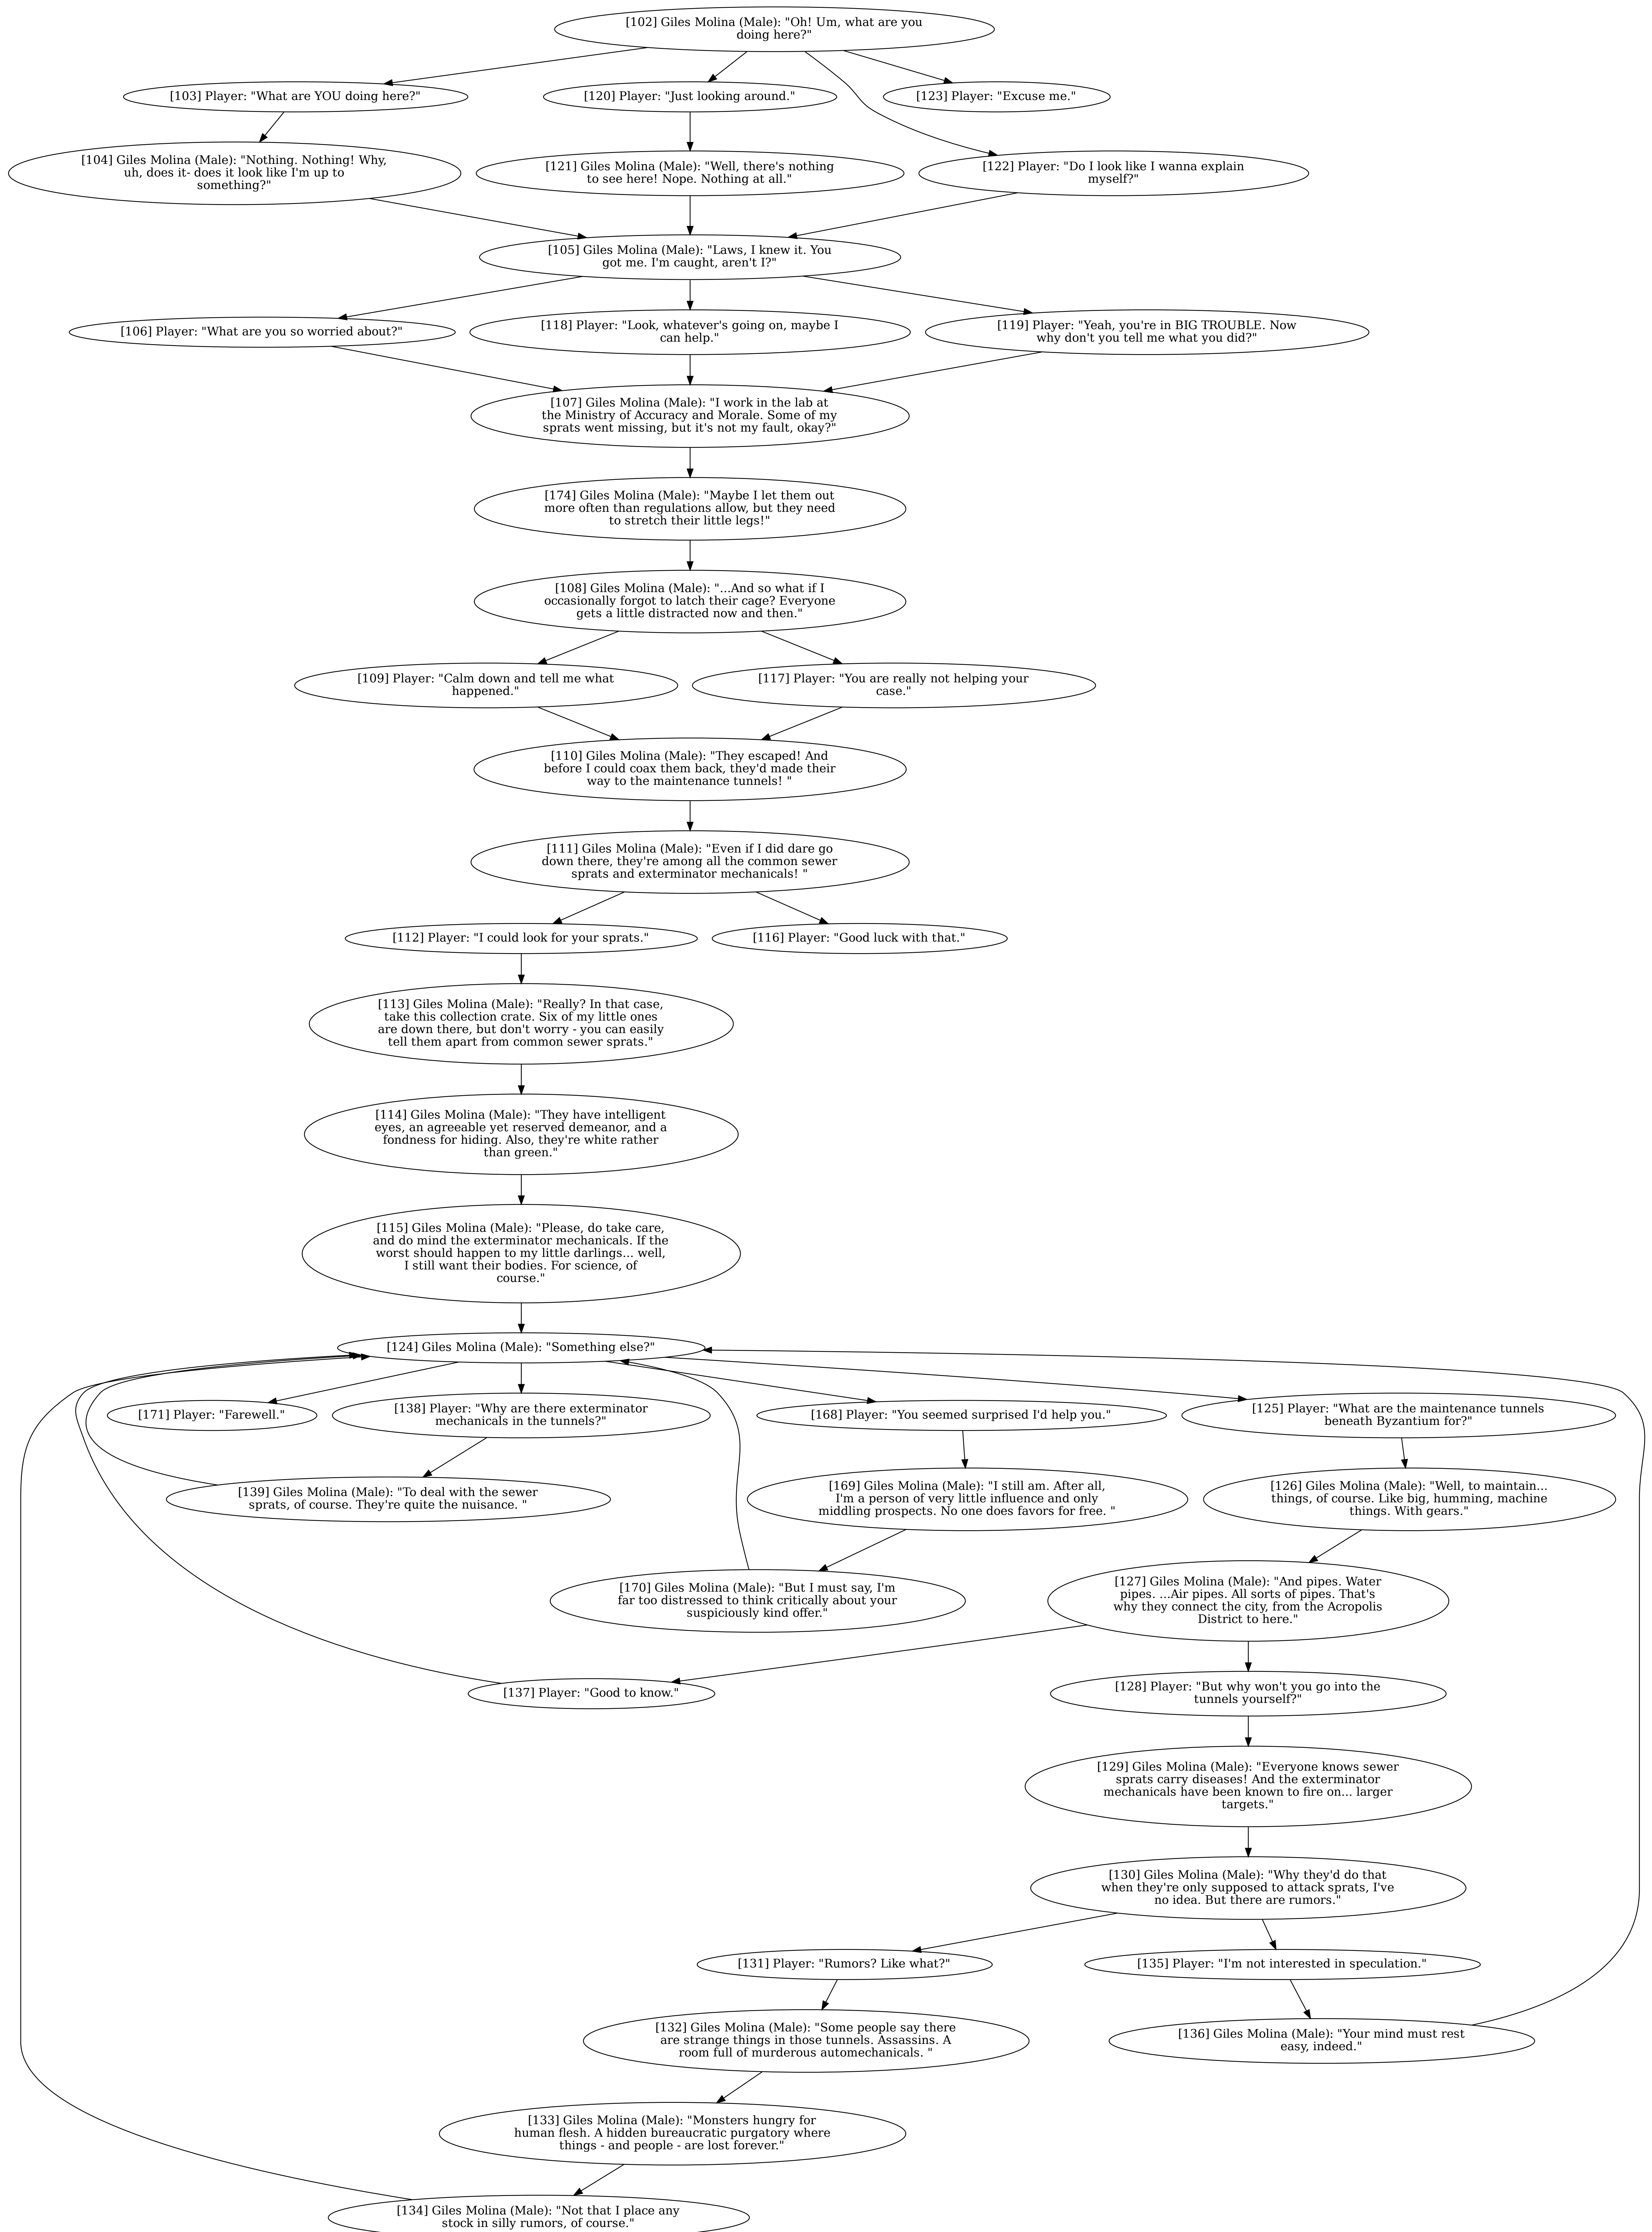

Supplement: software [file 2024.emnlp-main.520.software.zip]

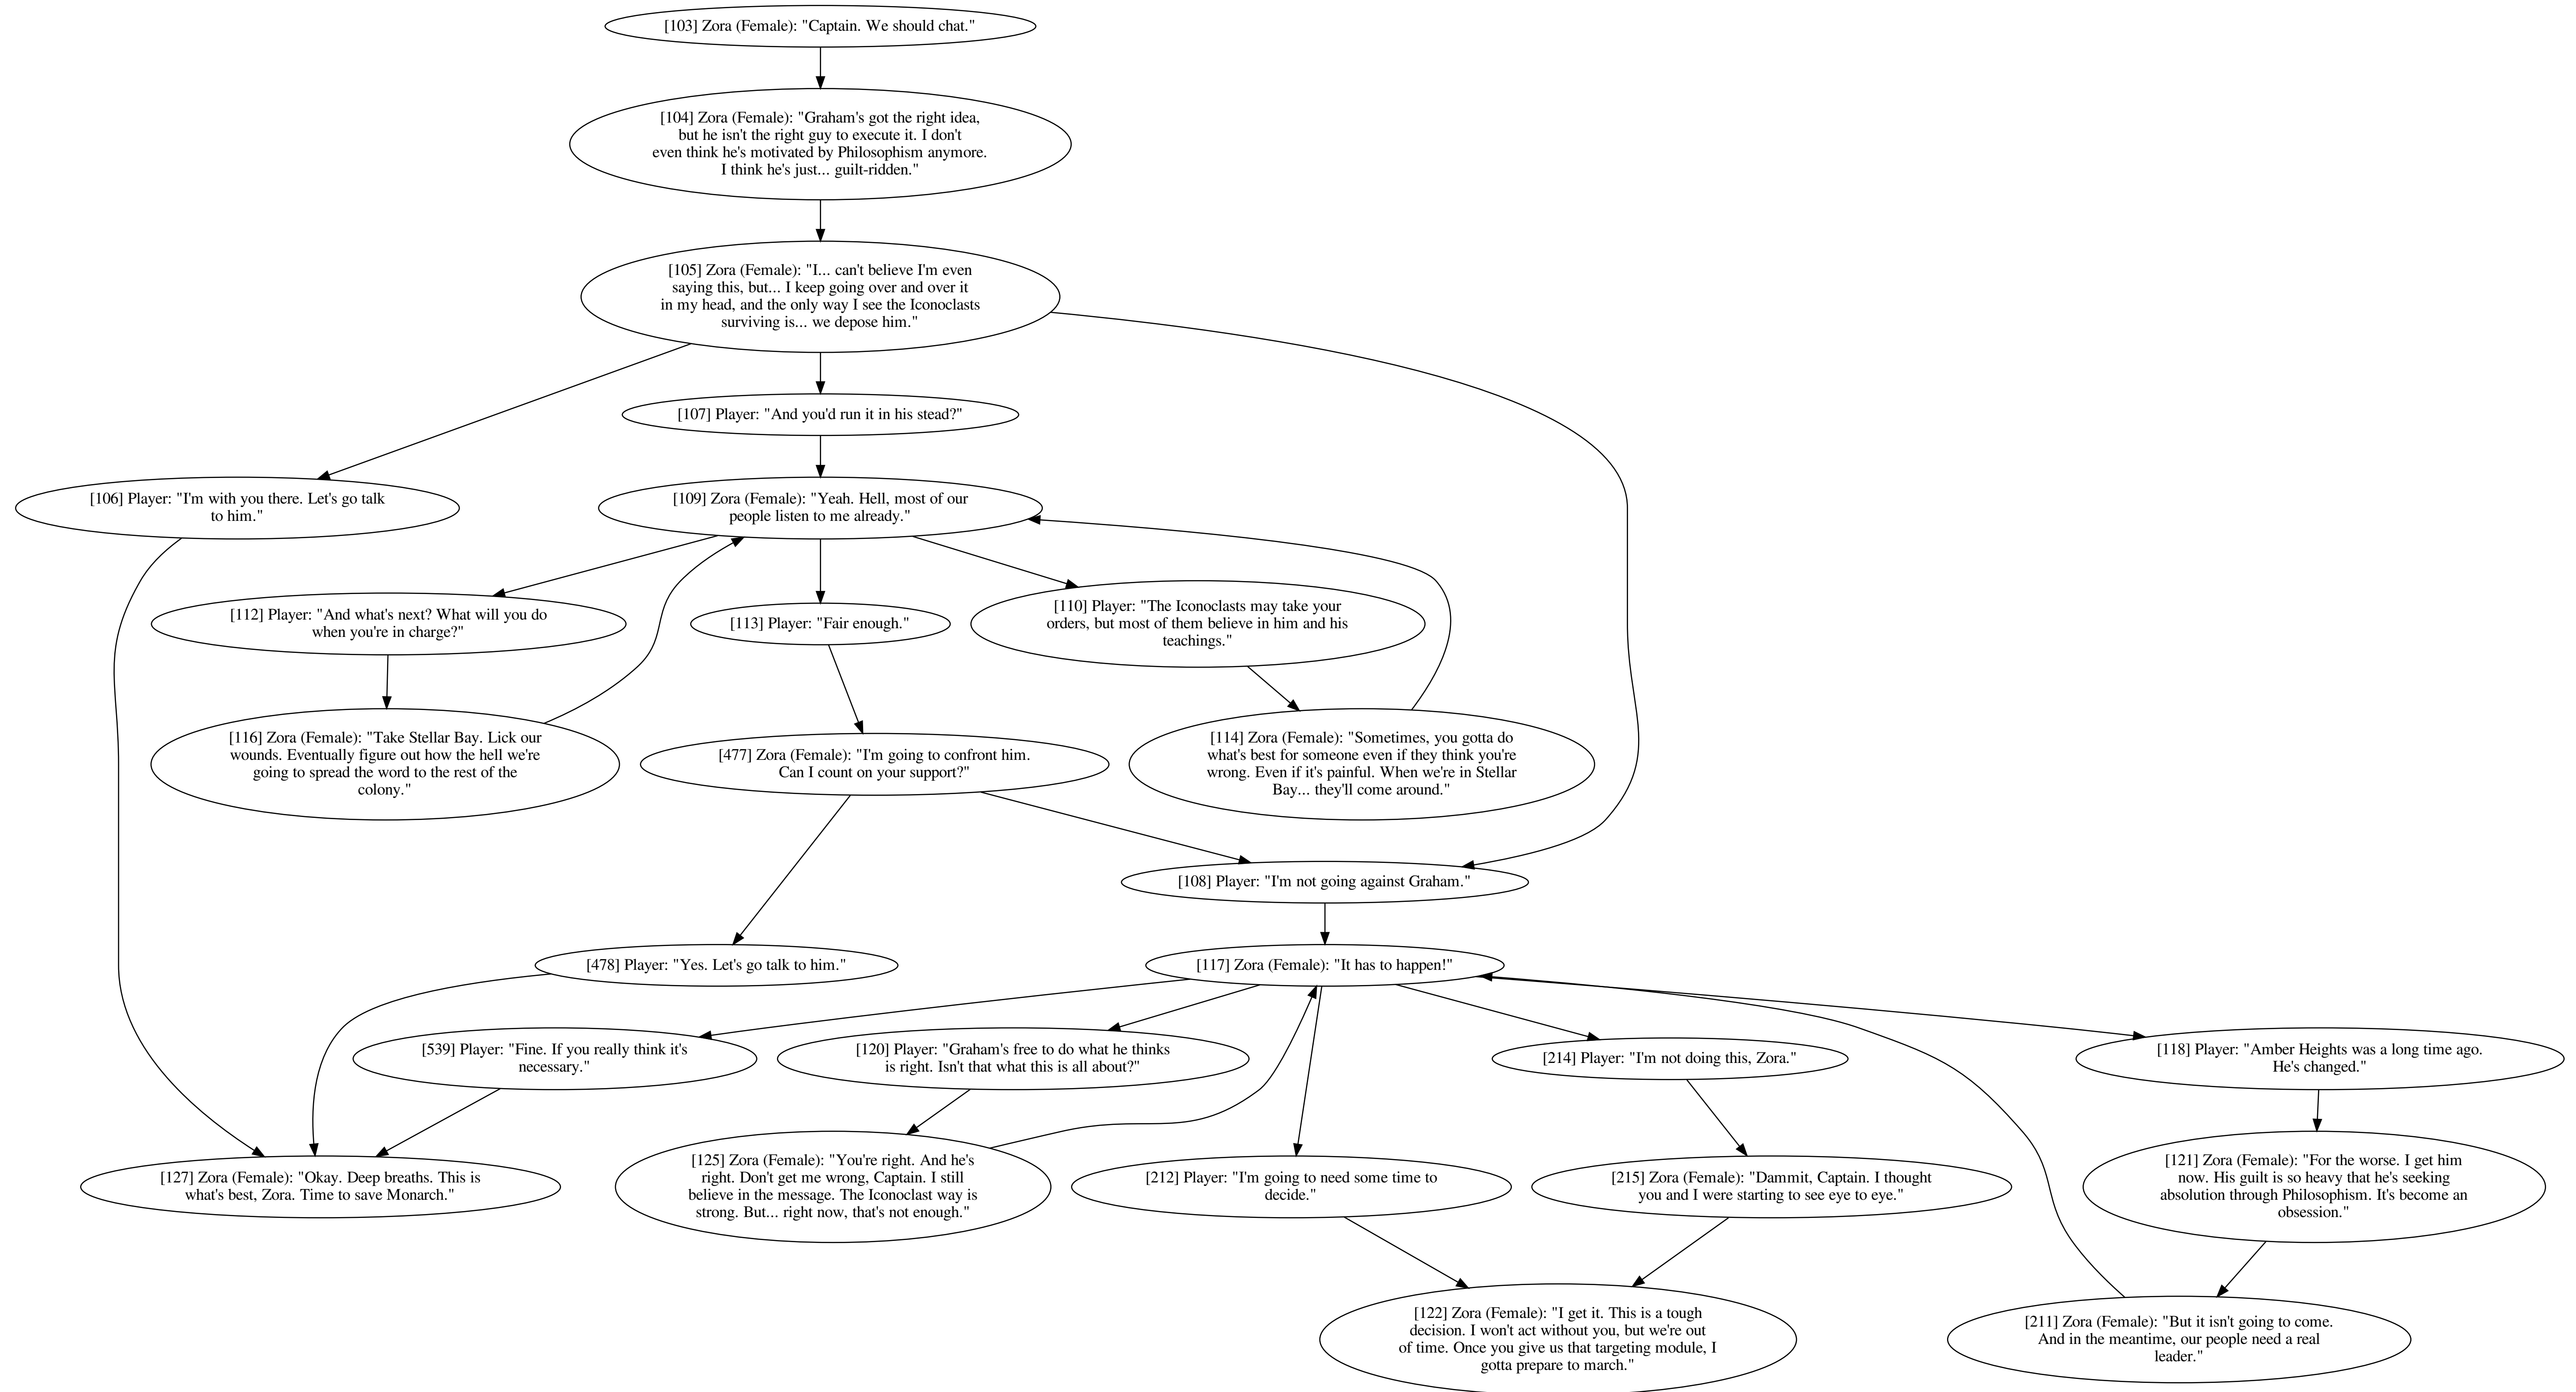

Supplement: software [file 2024.emnlp-main.520.software.zip]

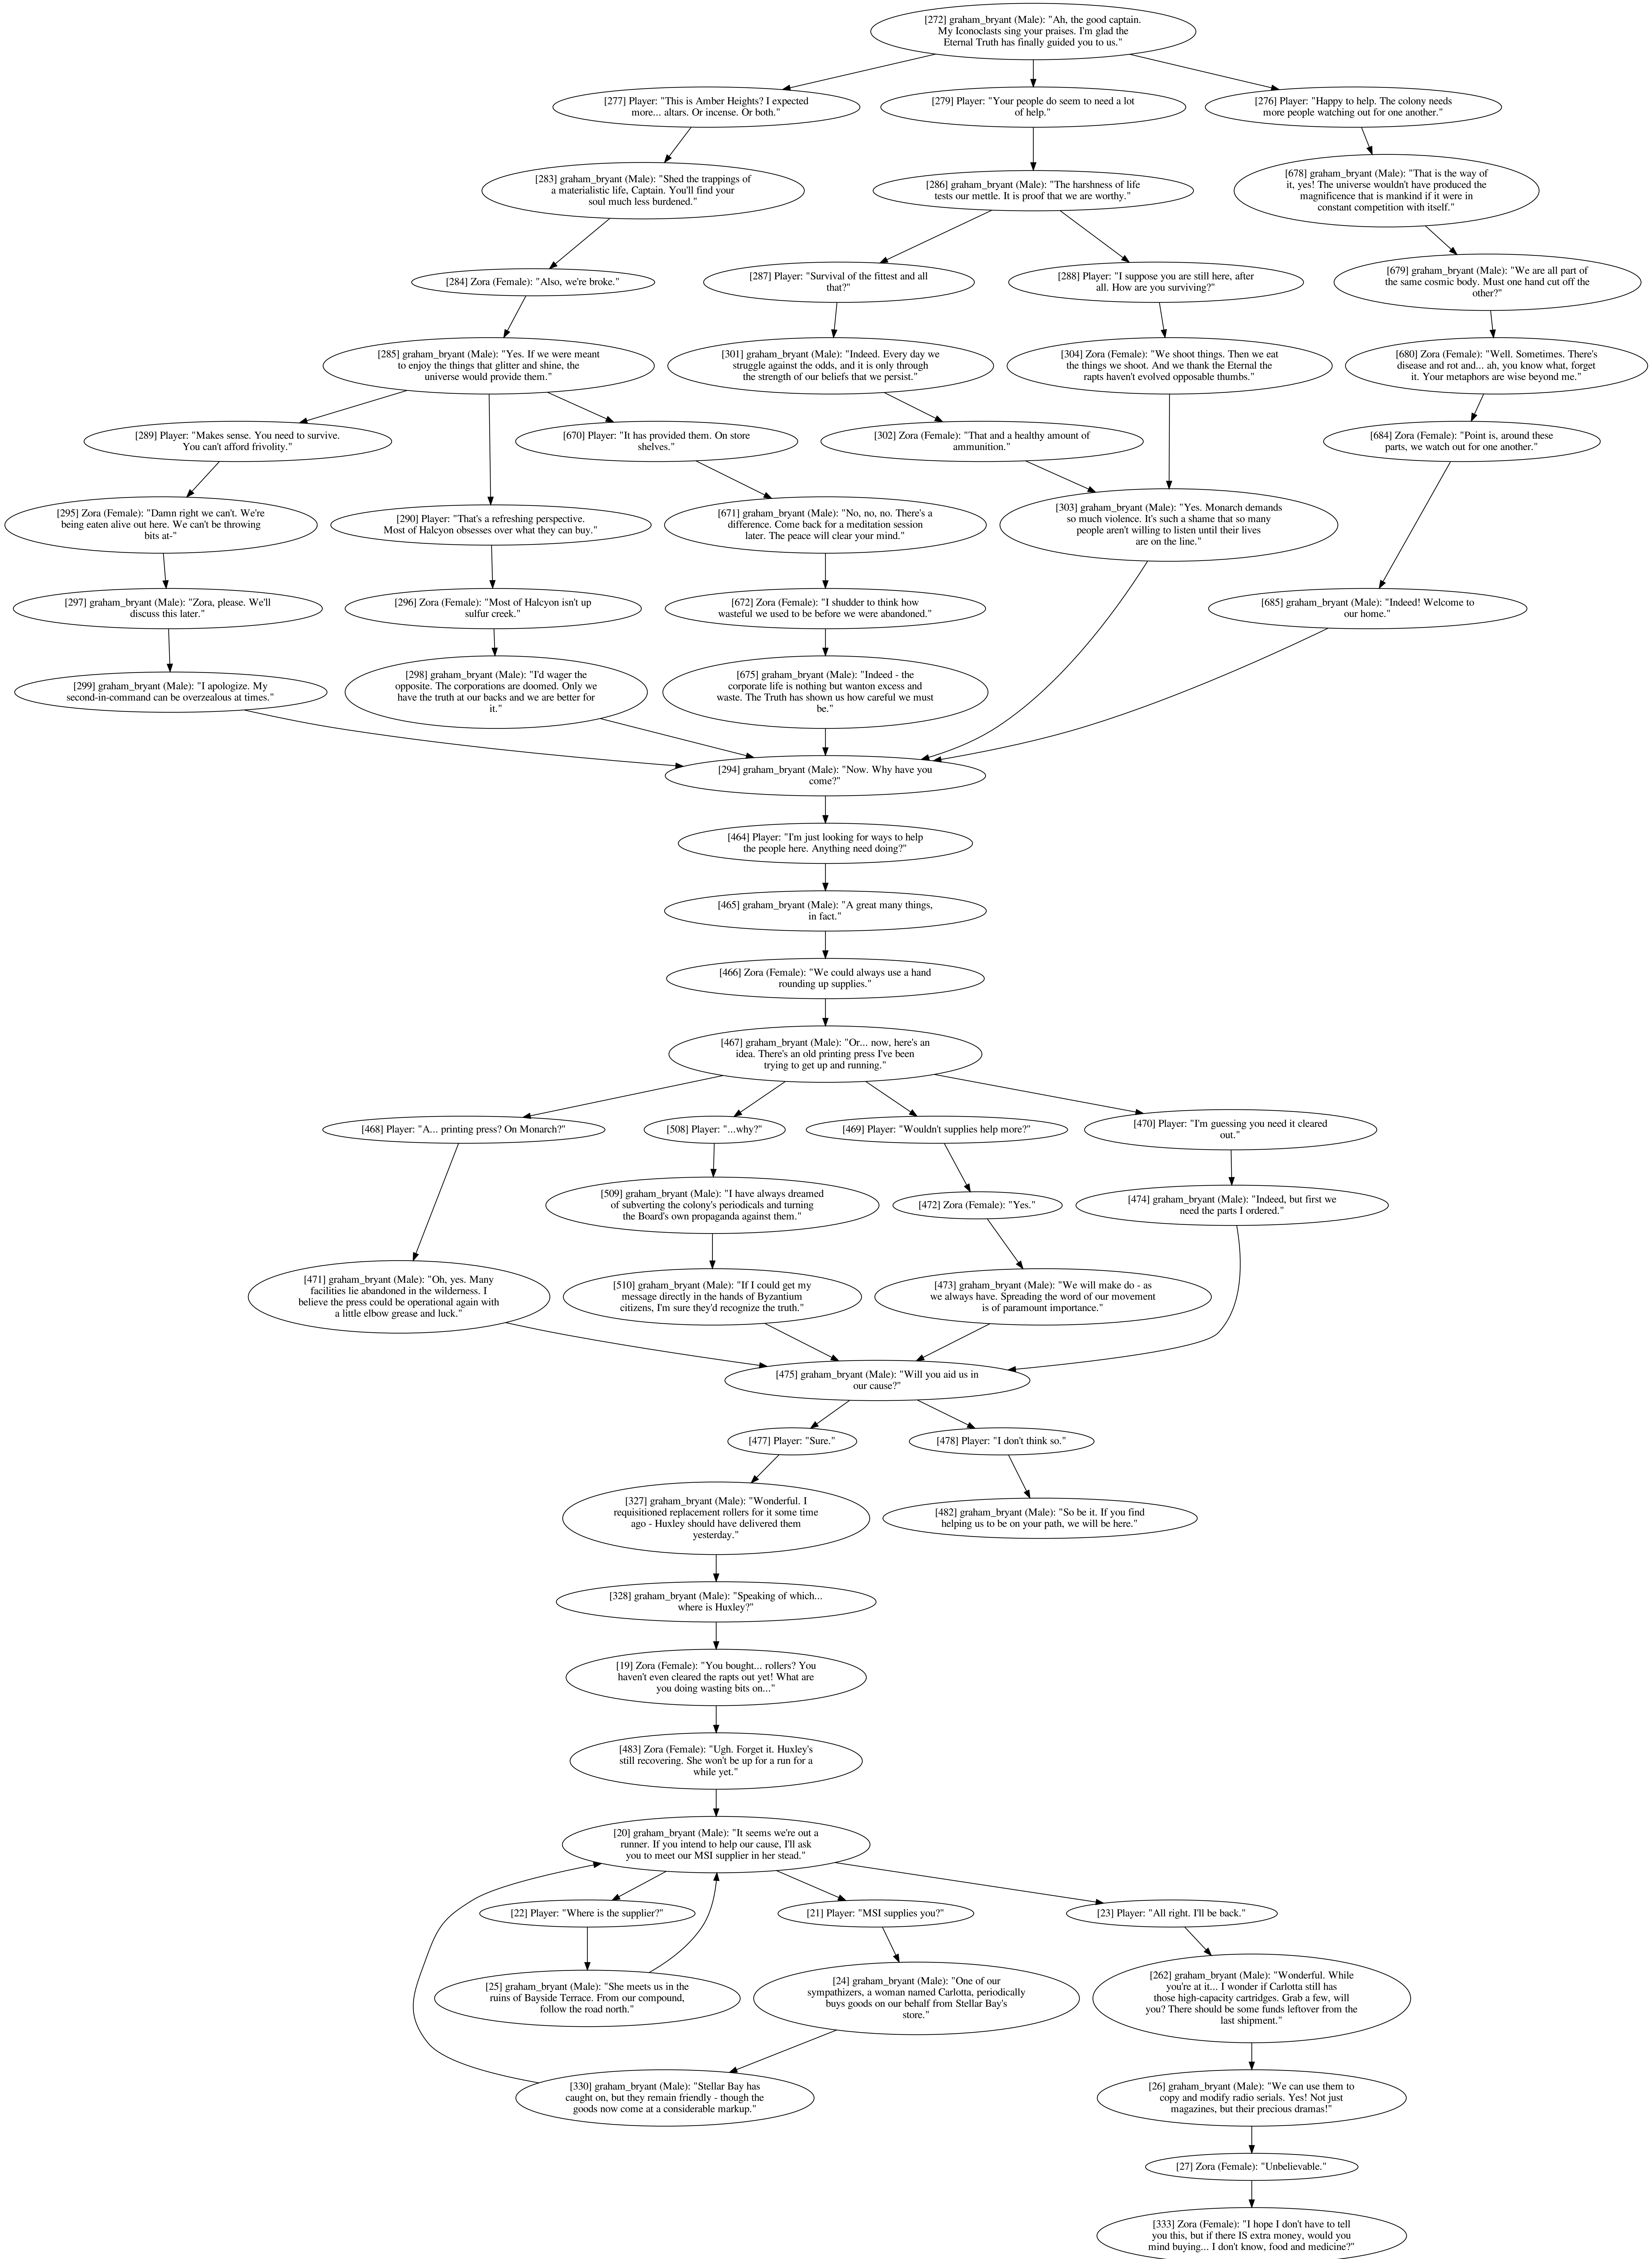

Supplement: software [file 2024.emnlp-main.520.software.zip]

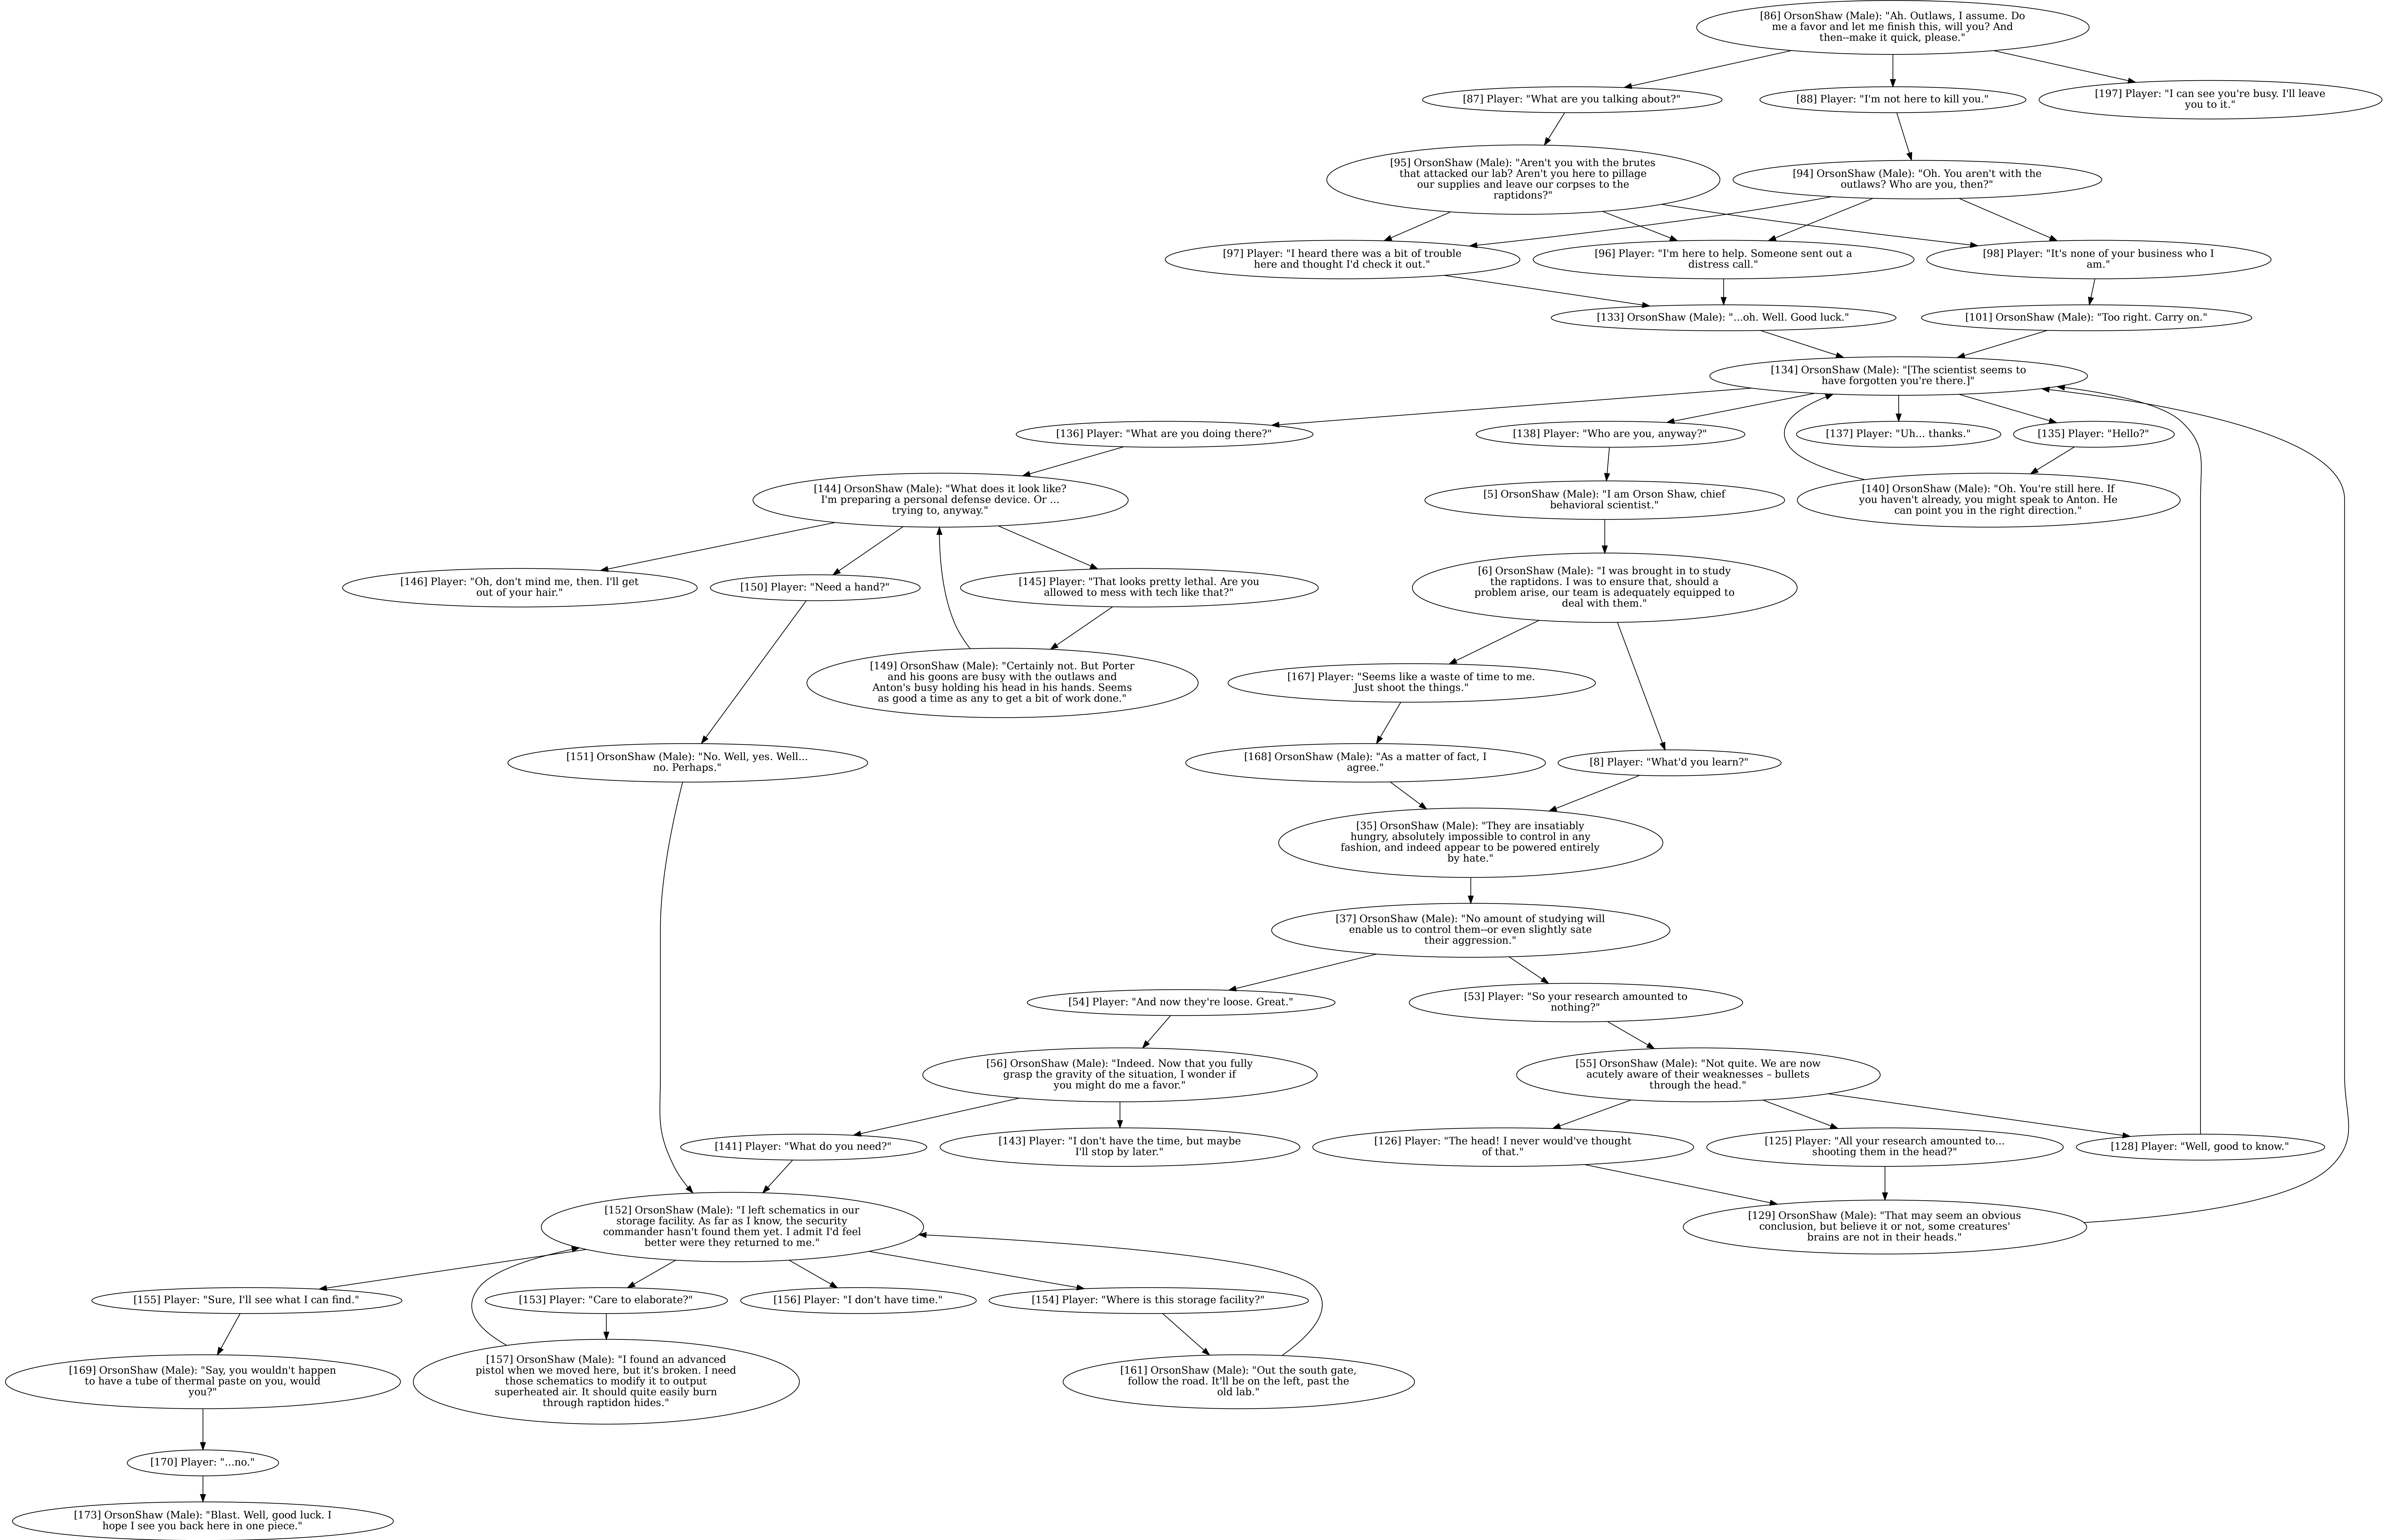

Supplement: software [file 2024.emnlp-main.520.software.zip]

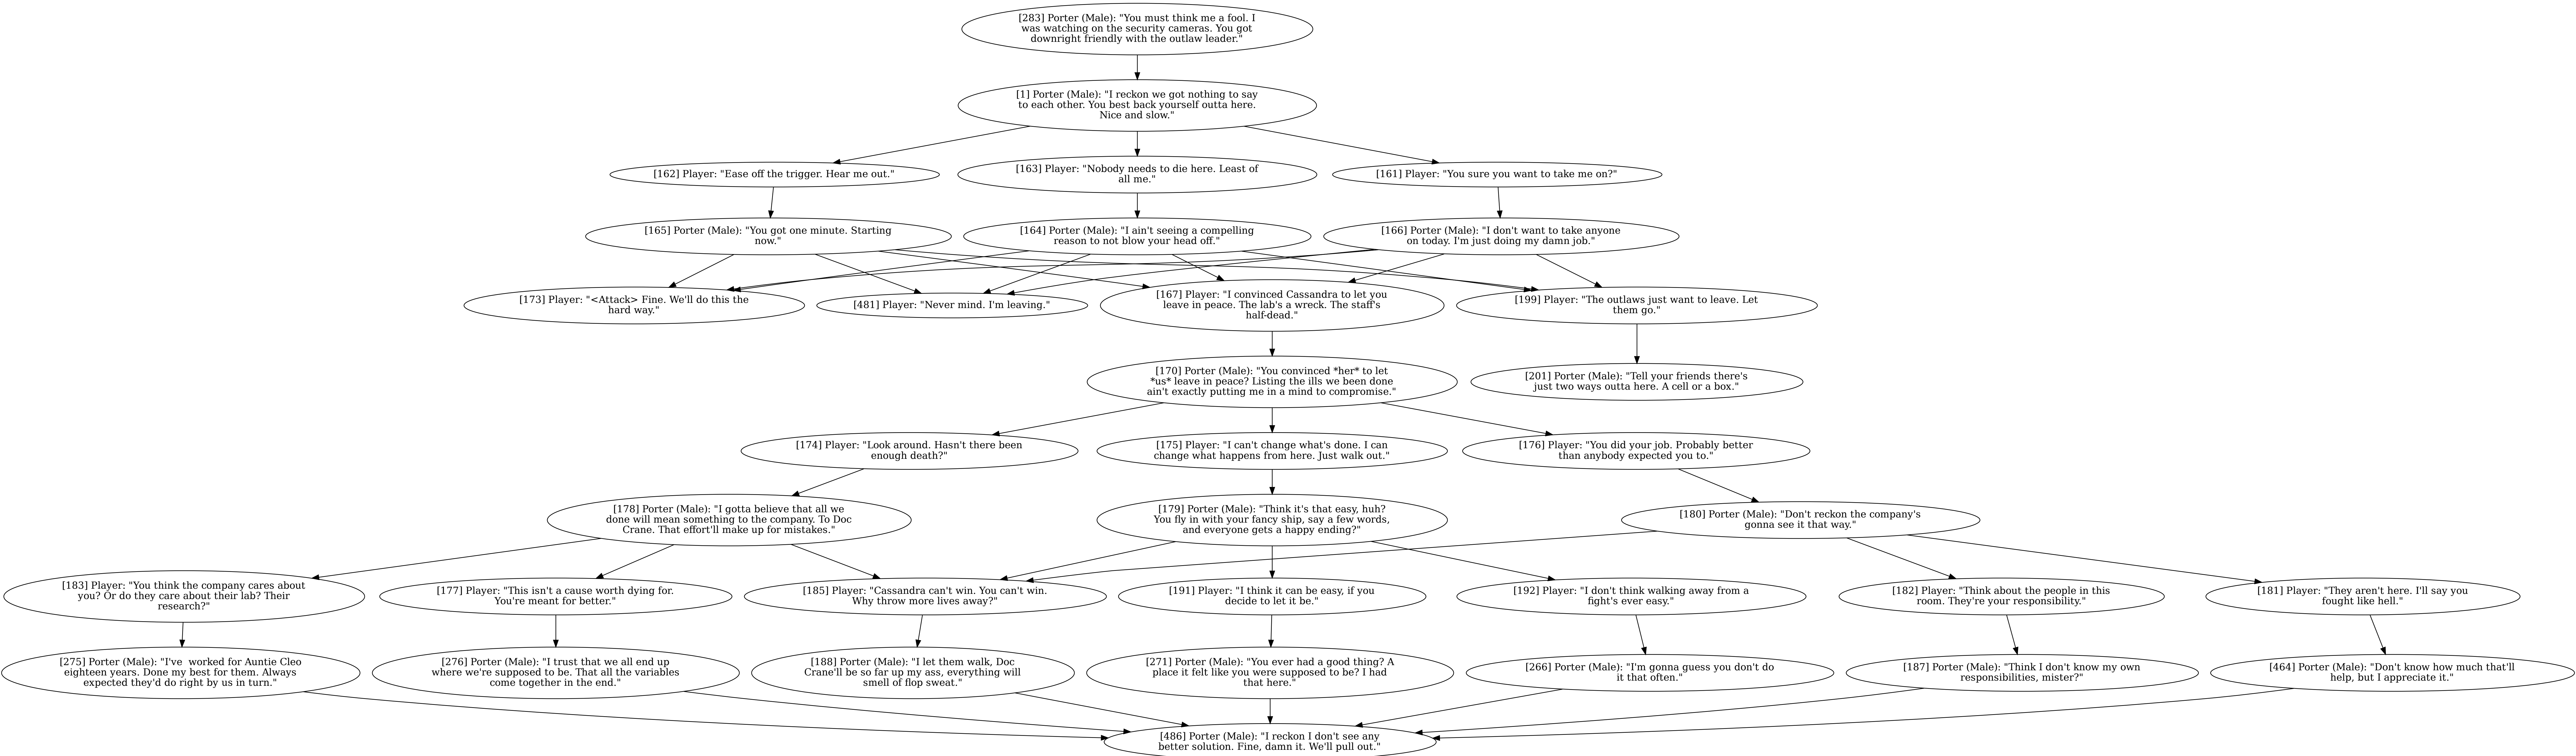

Supplement: software [file 2024.emnlp-main.520.software.zip]

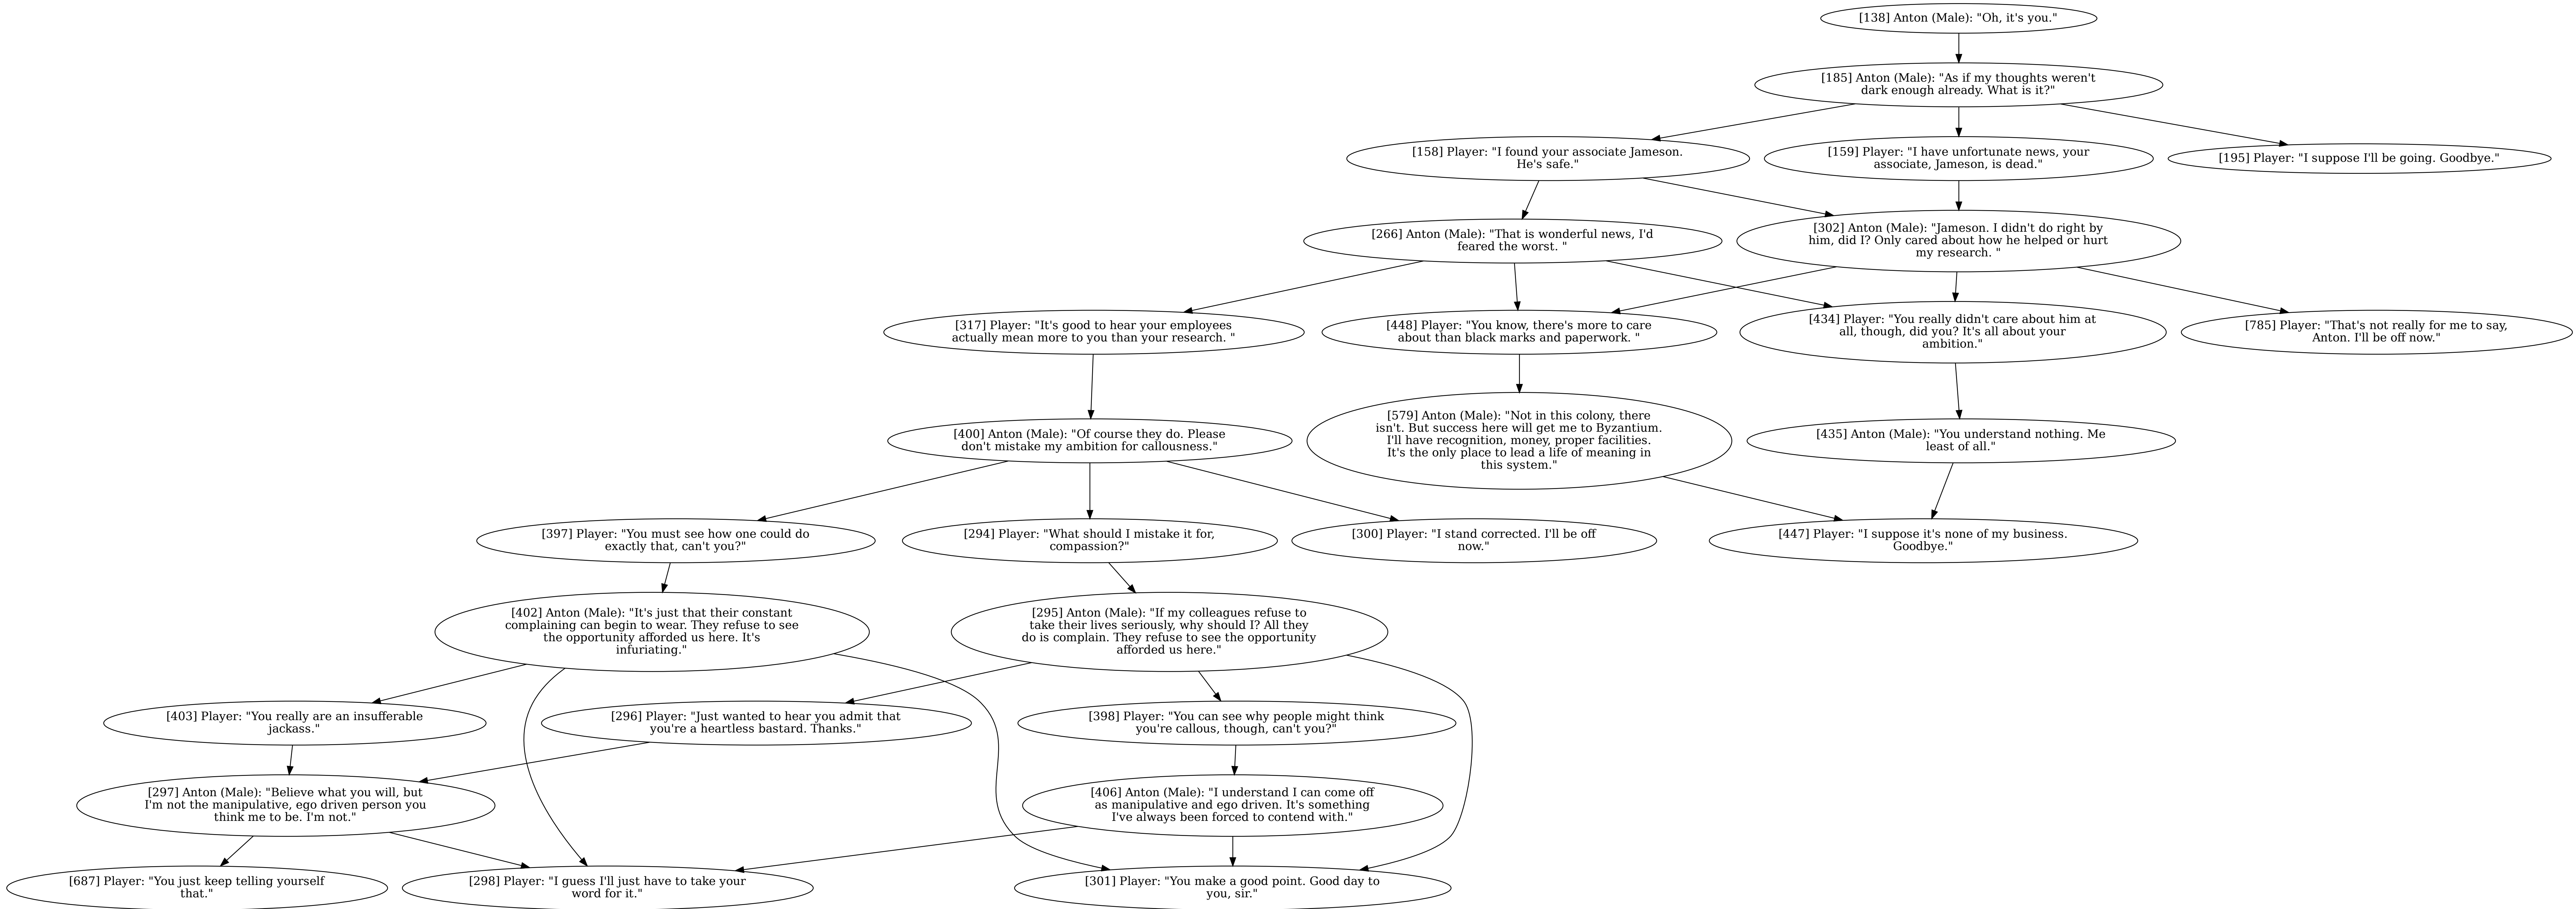

Supplement: software [file 2024.emnlp-main.520.software.zip]

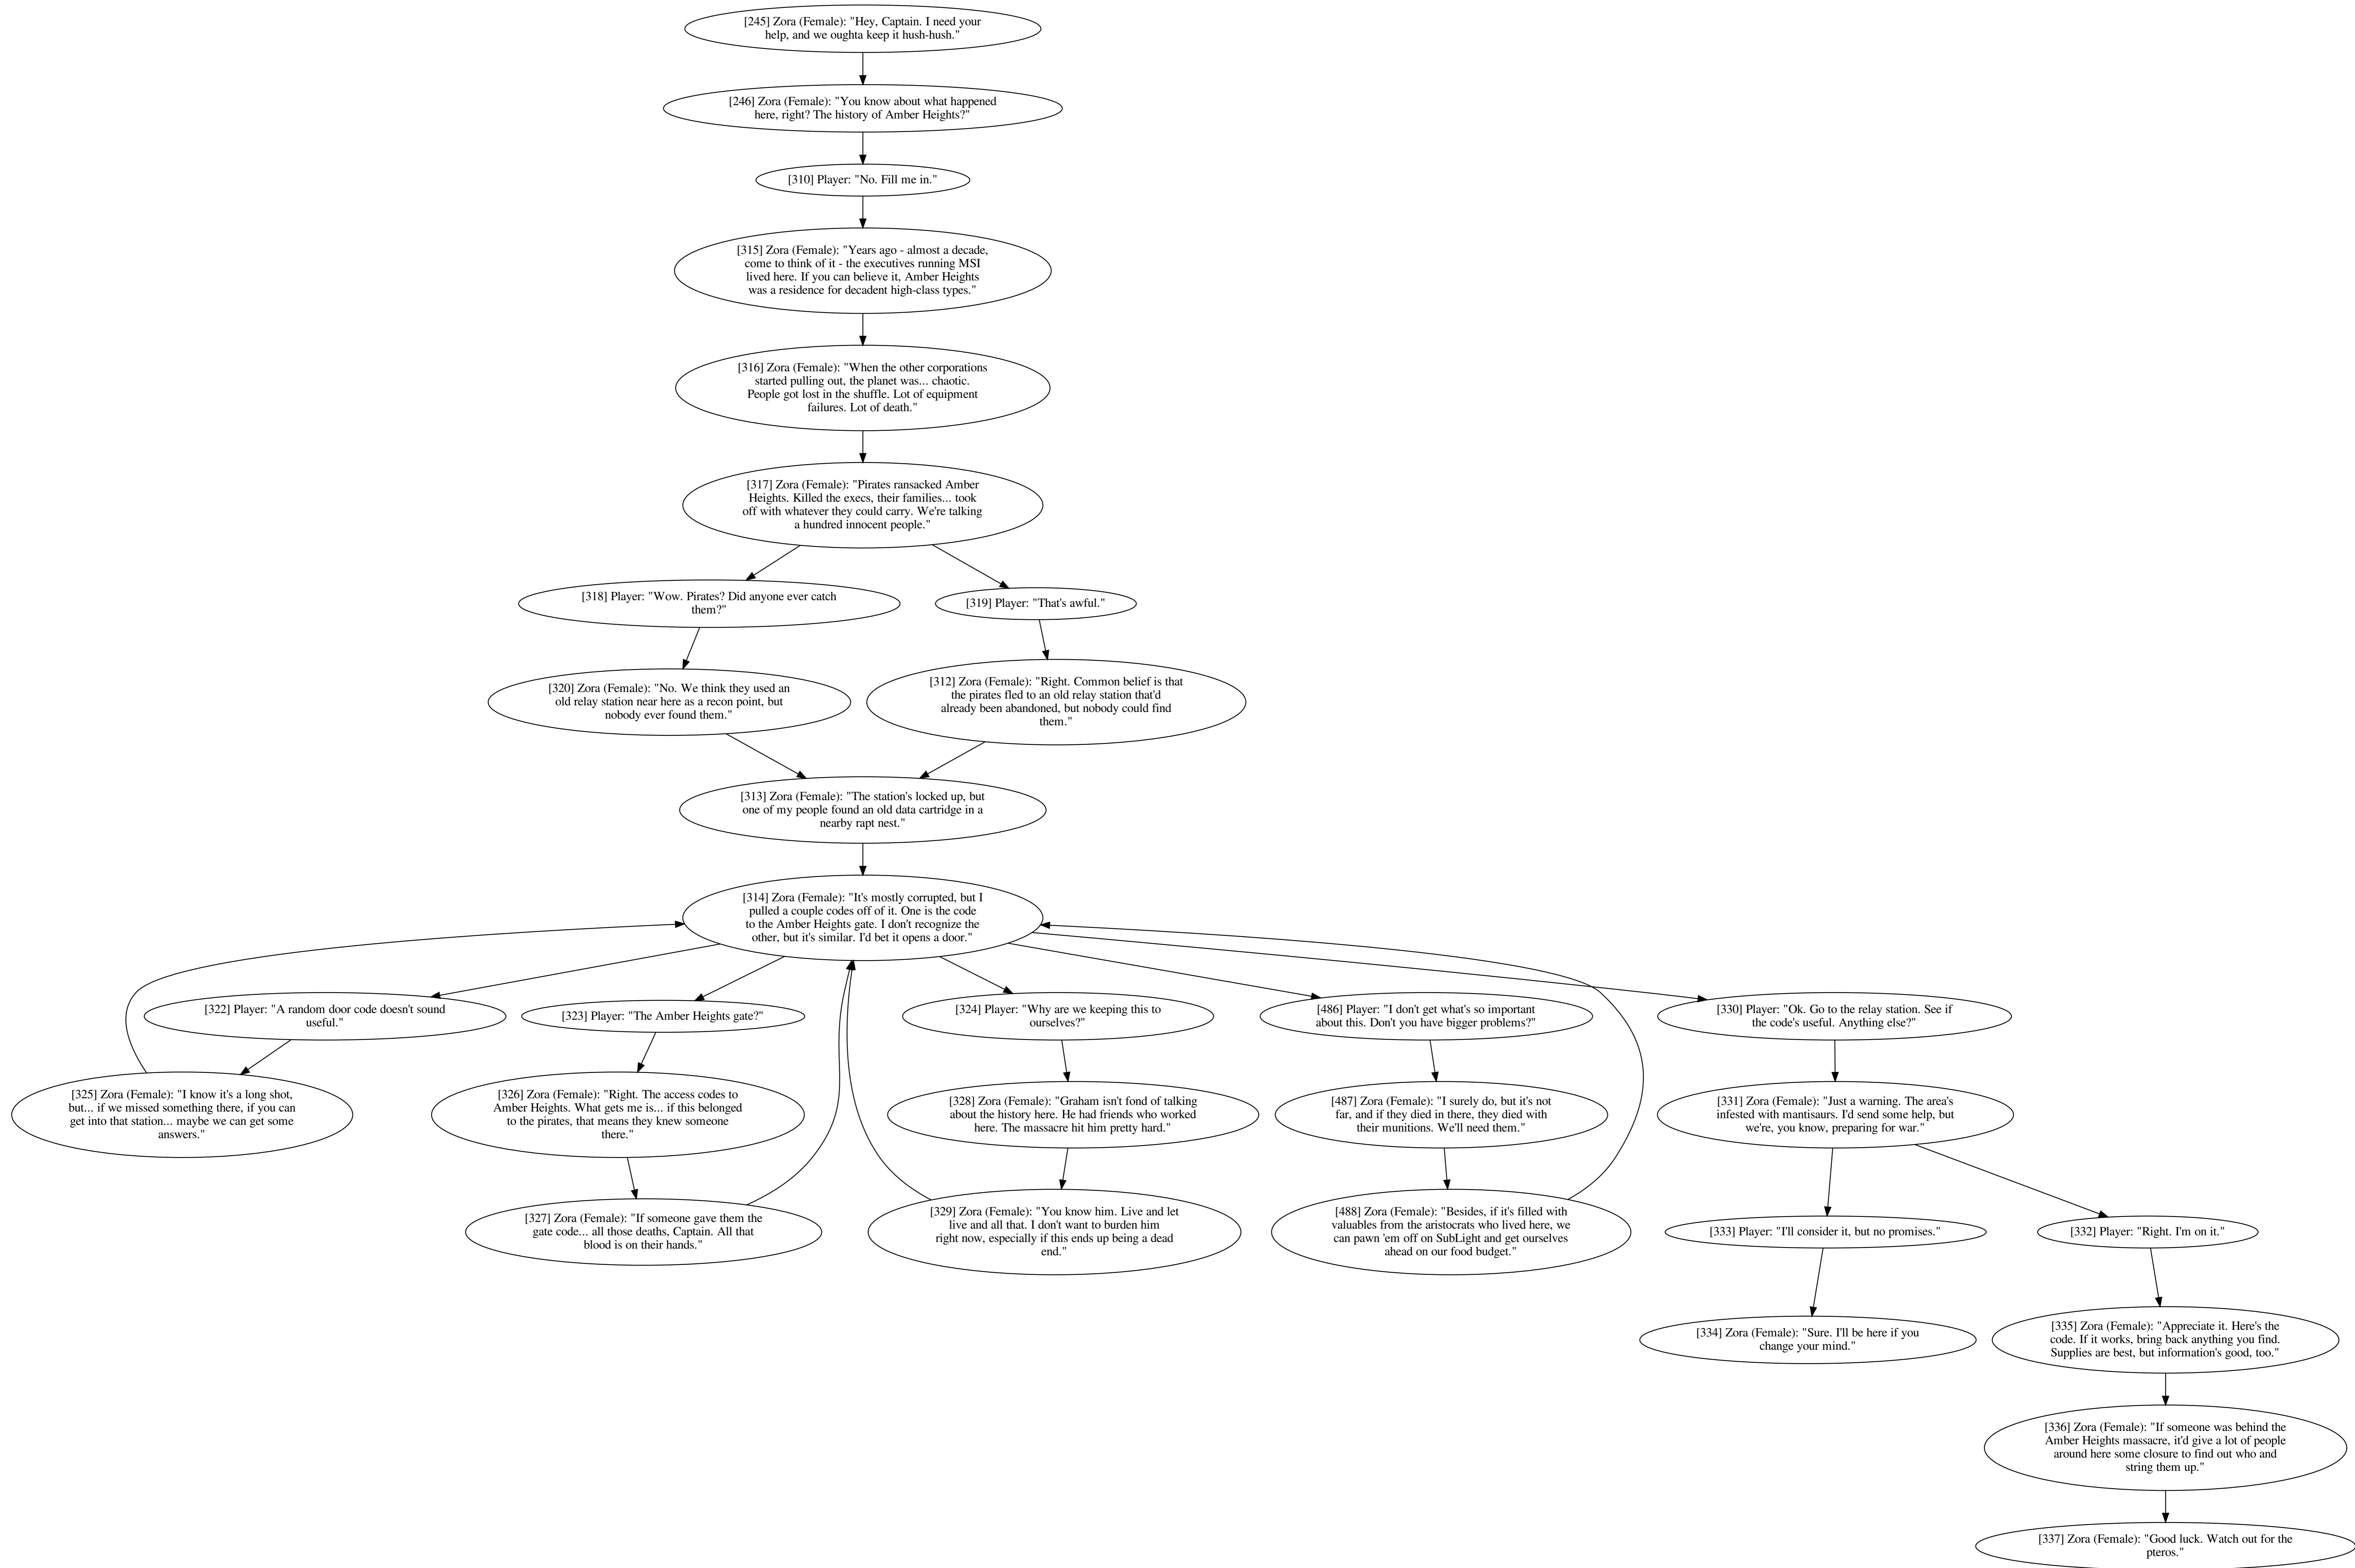

Supplement: software [file 2024.emnlp-main.520.software.zip]

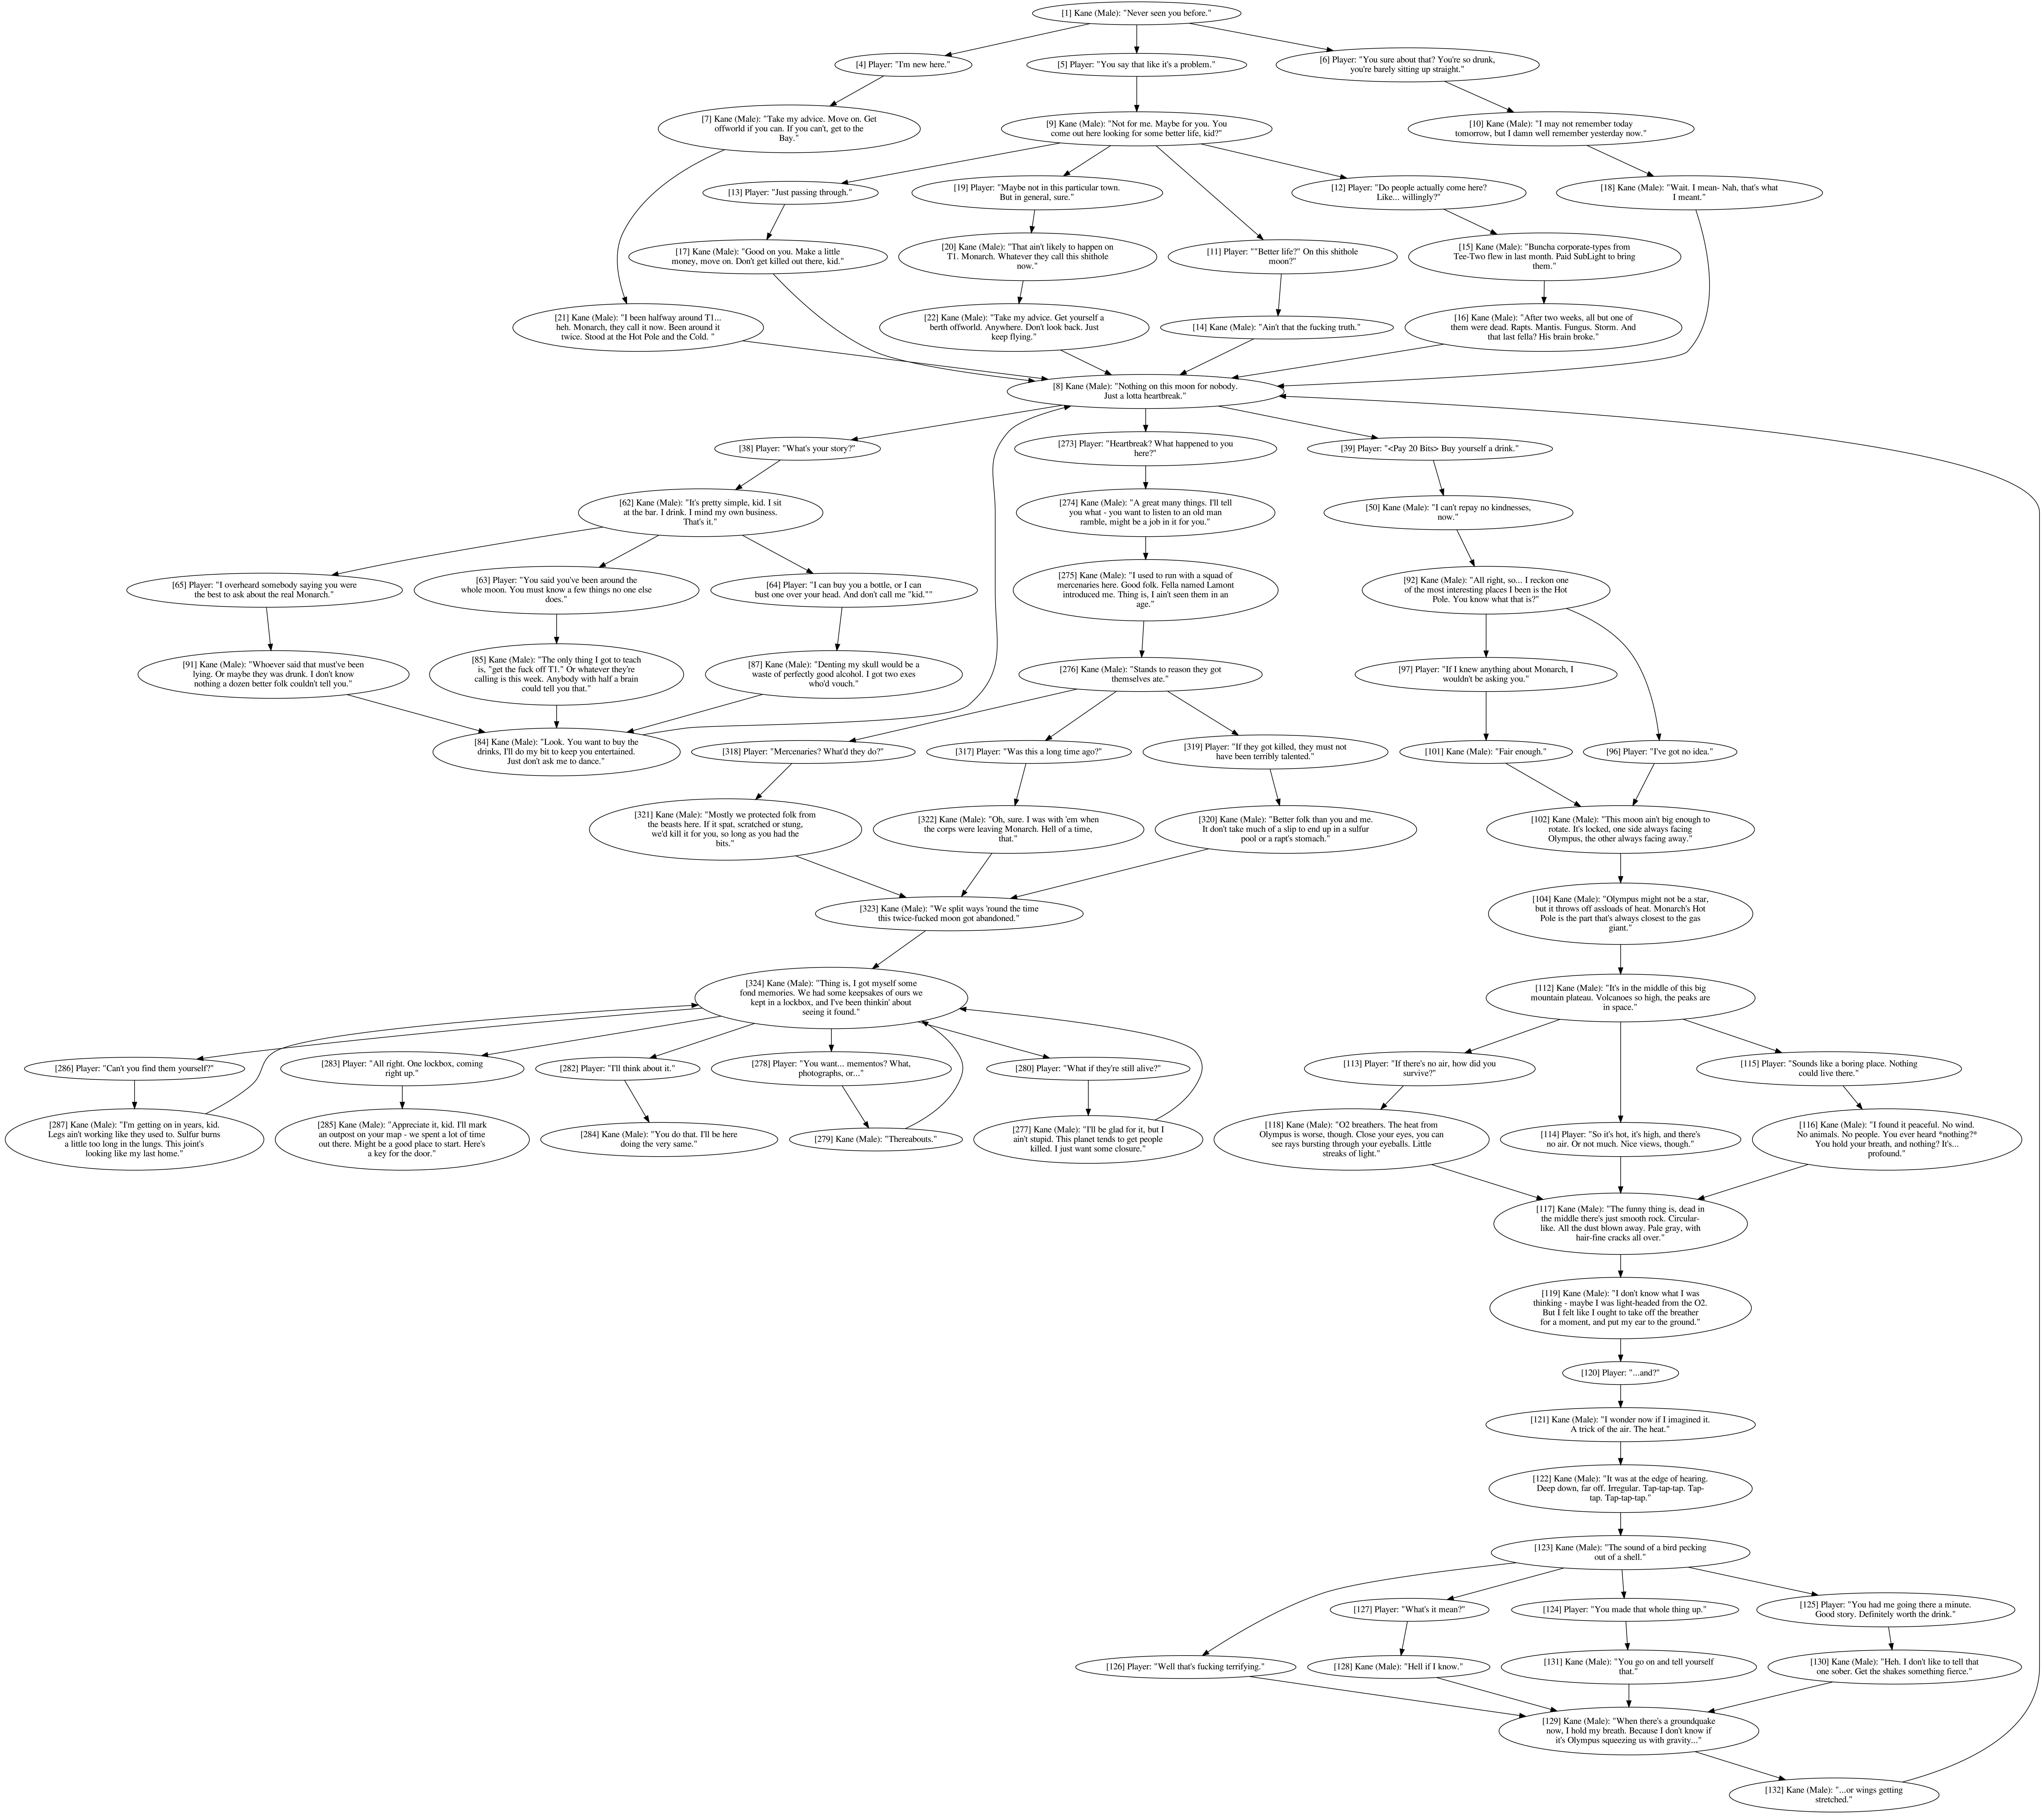

Supplement: software [file 2024.emnlp-main.520.software.zip]

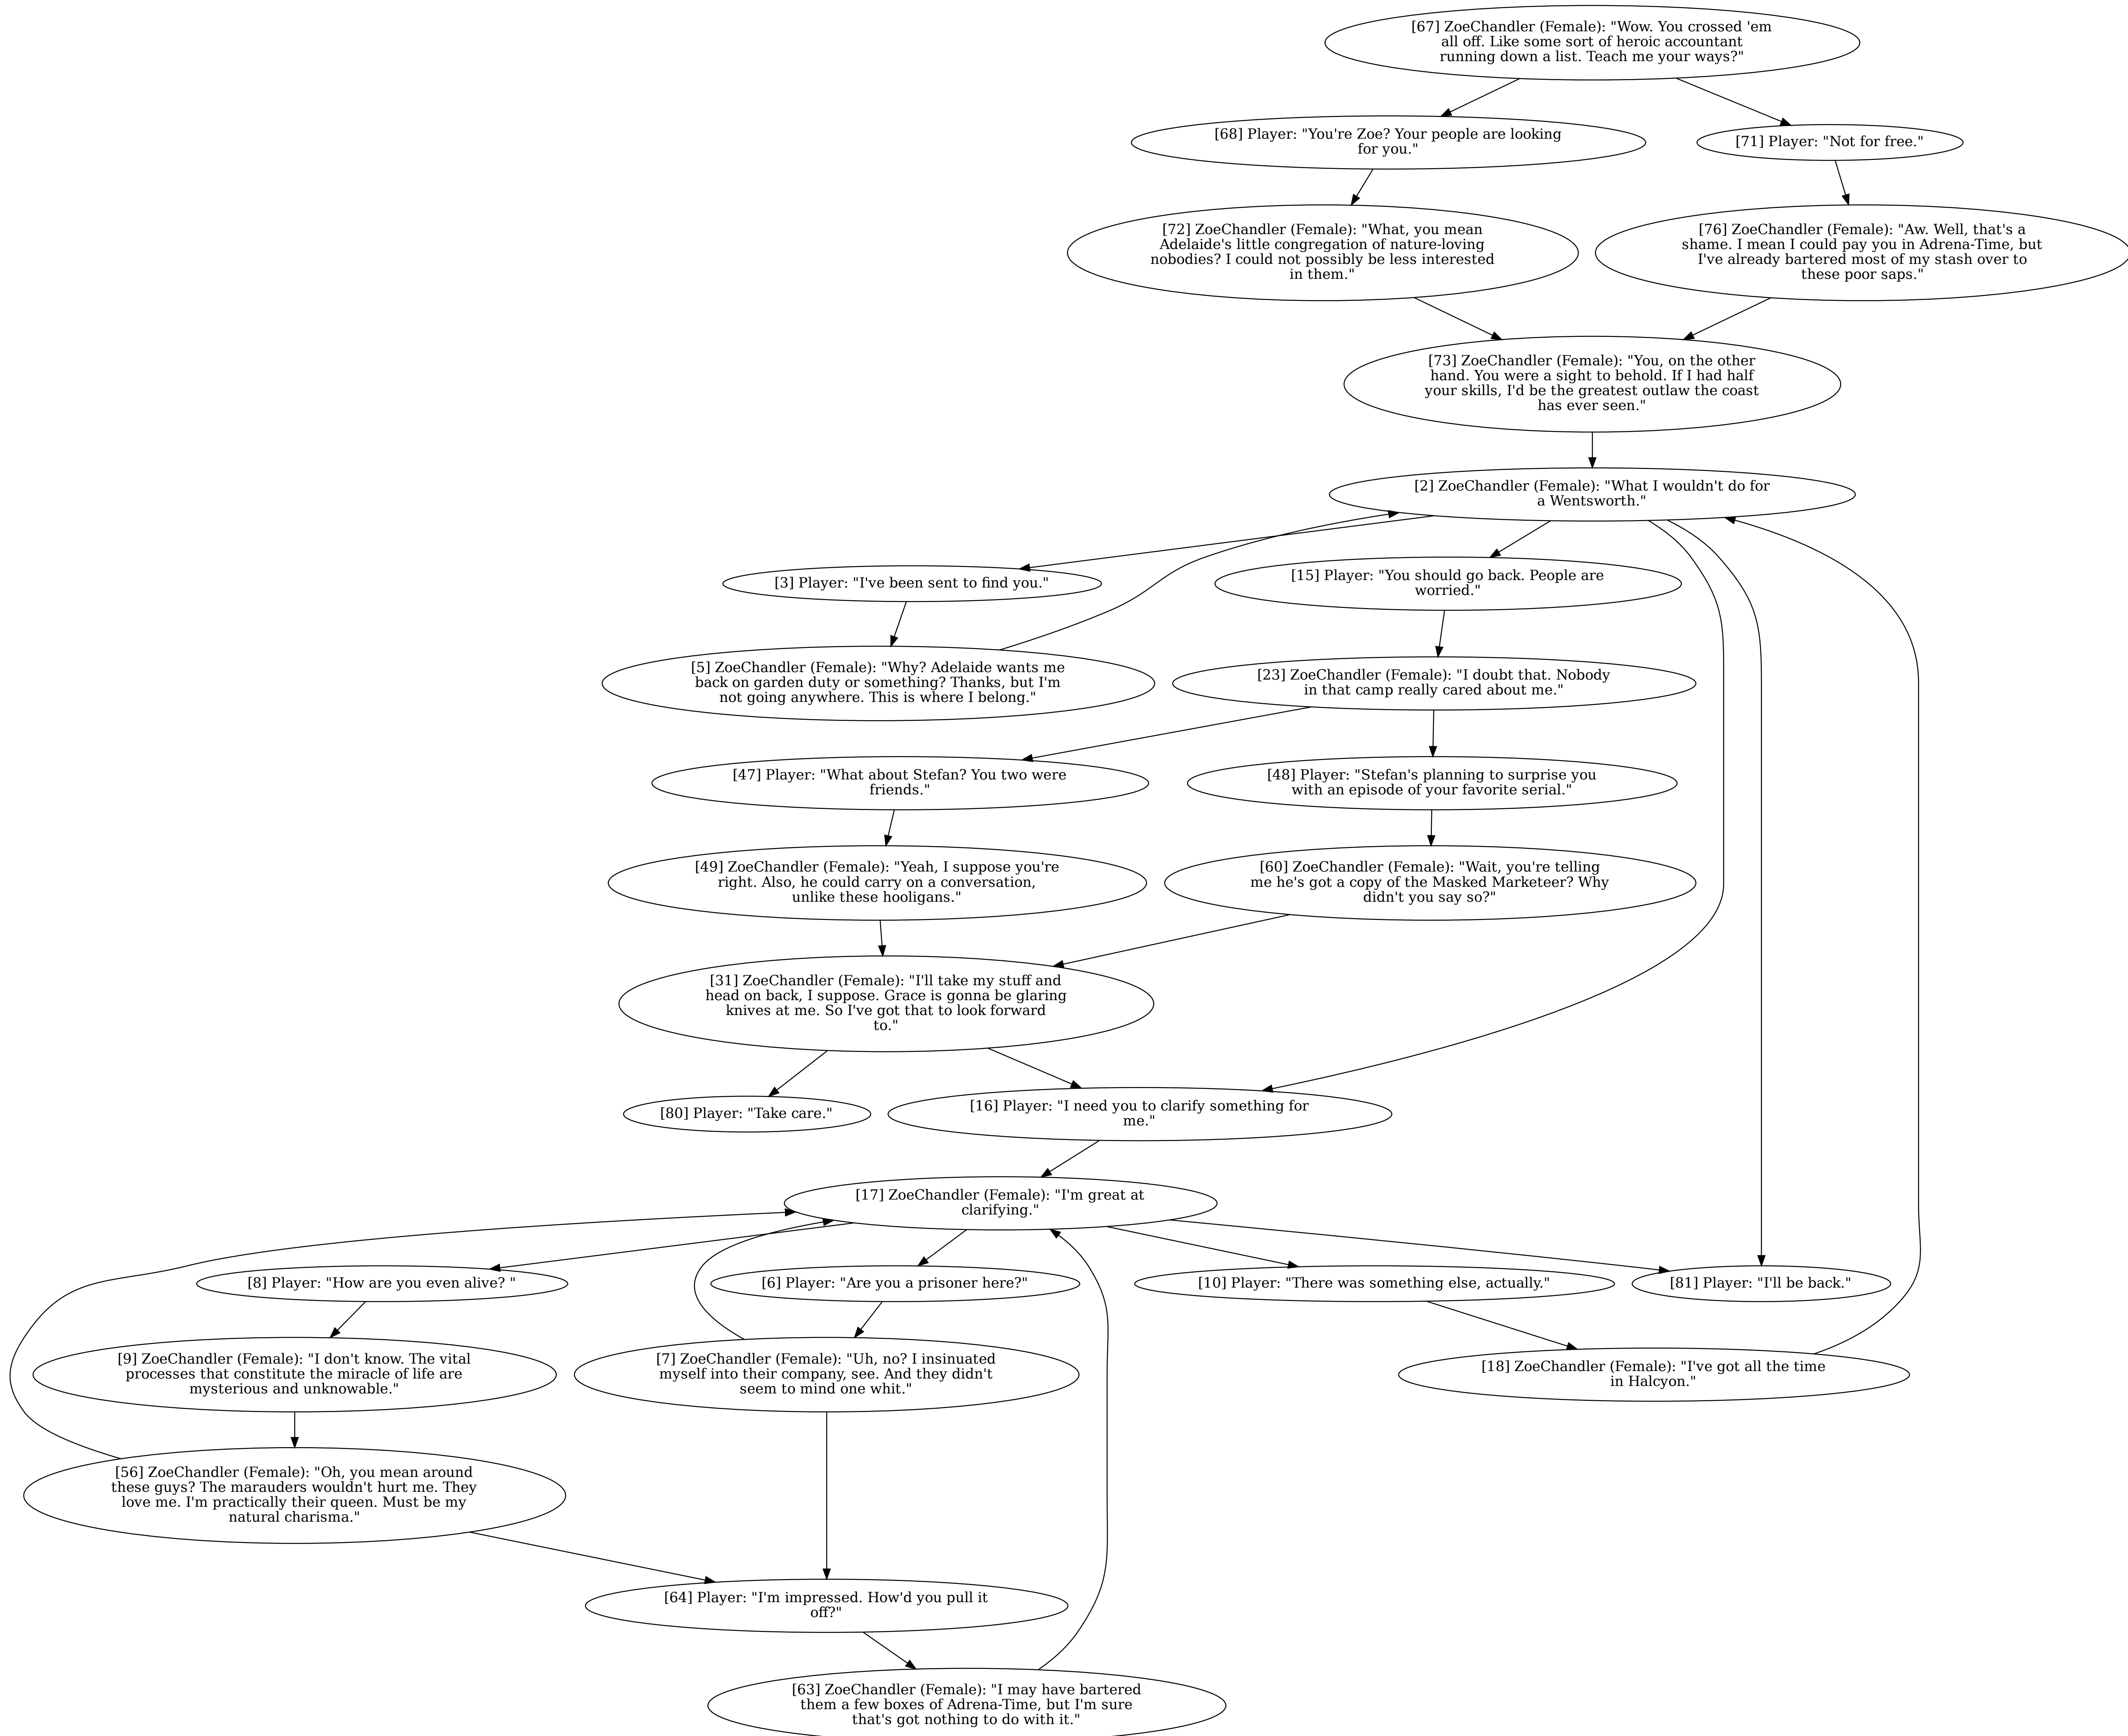

Supplement: software [file 2024.emnlp-main.520.software.zip]

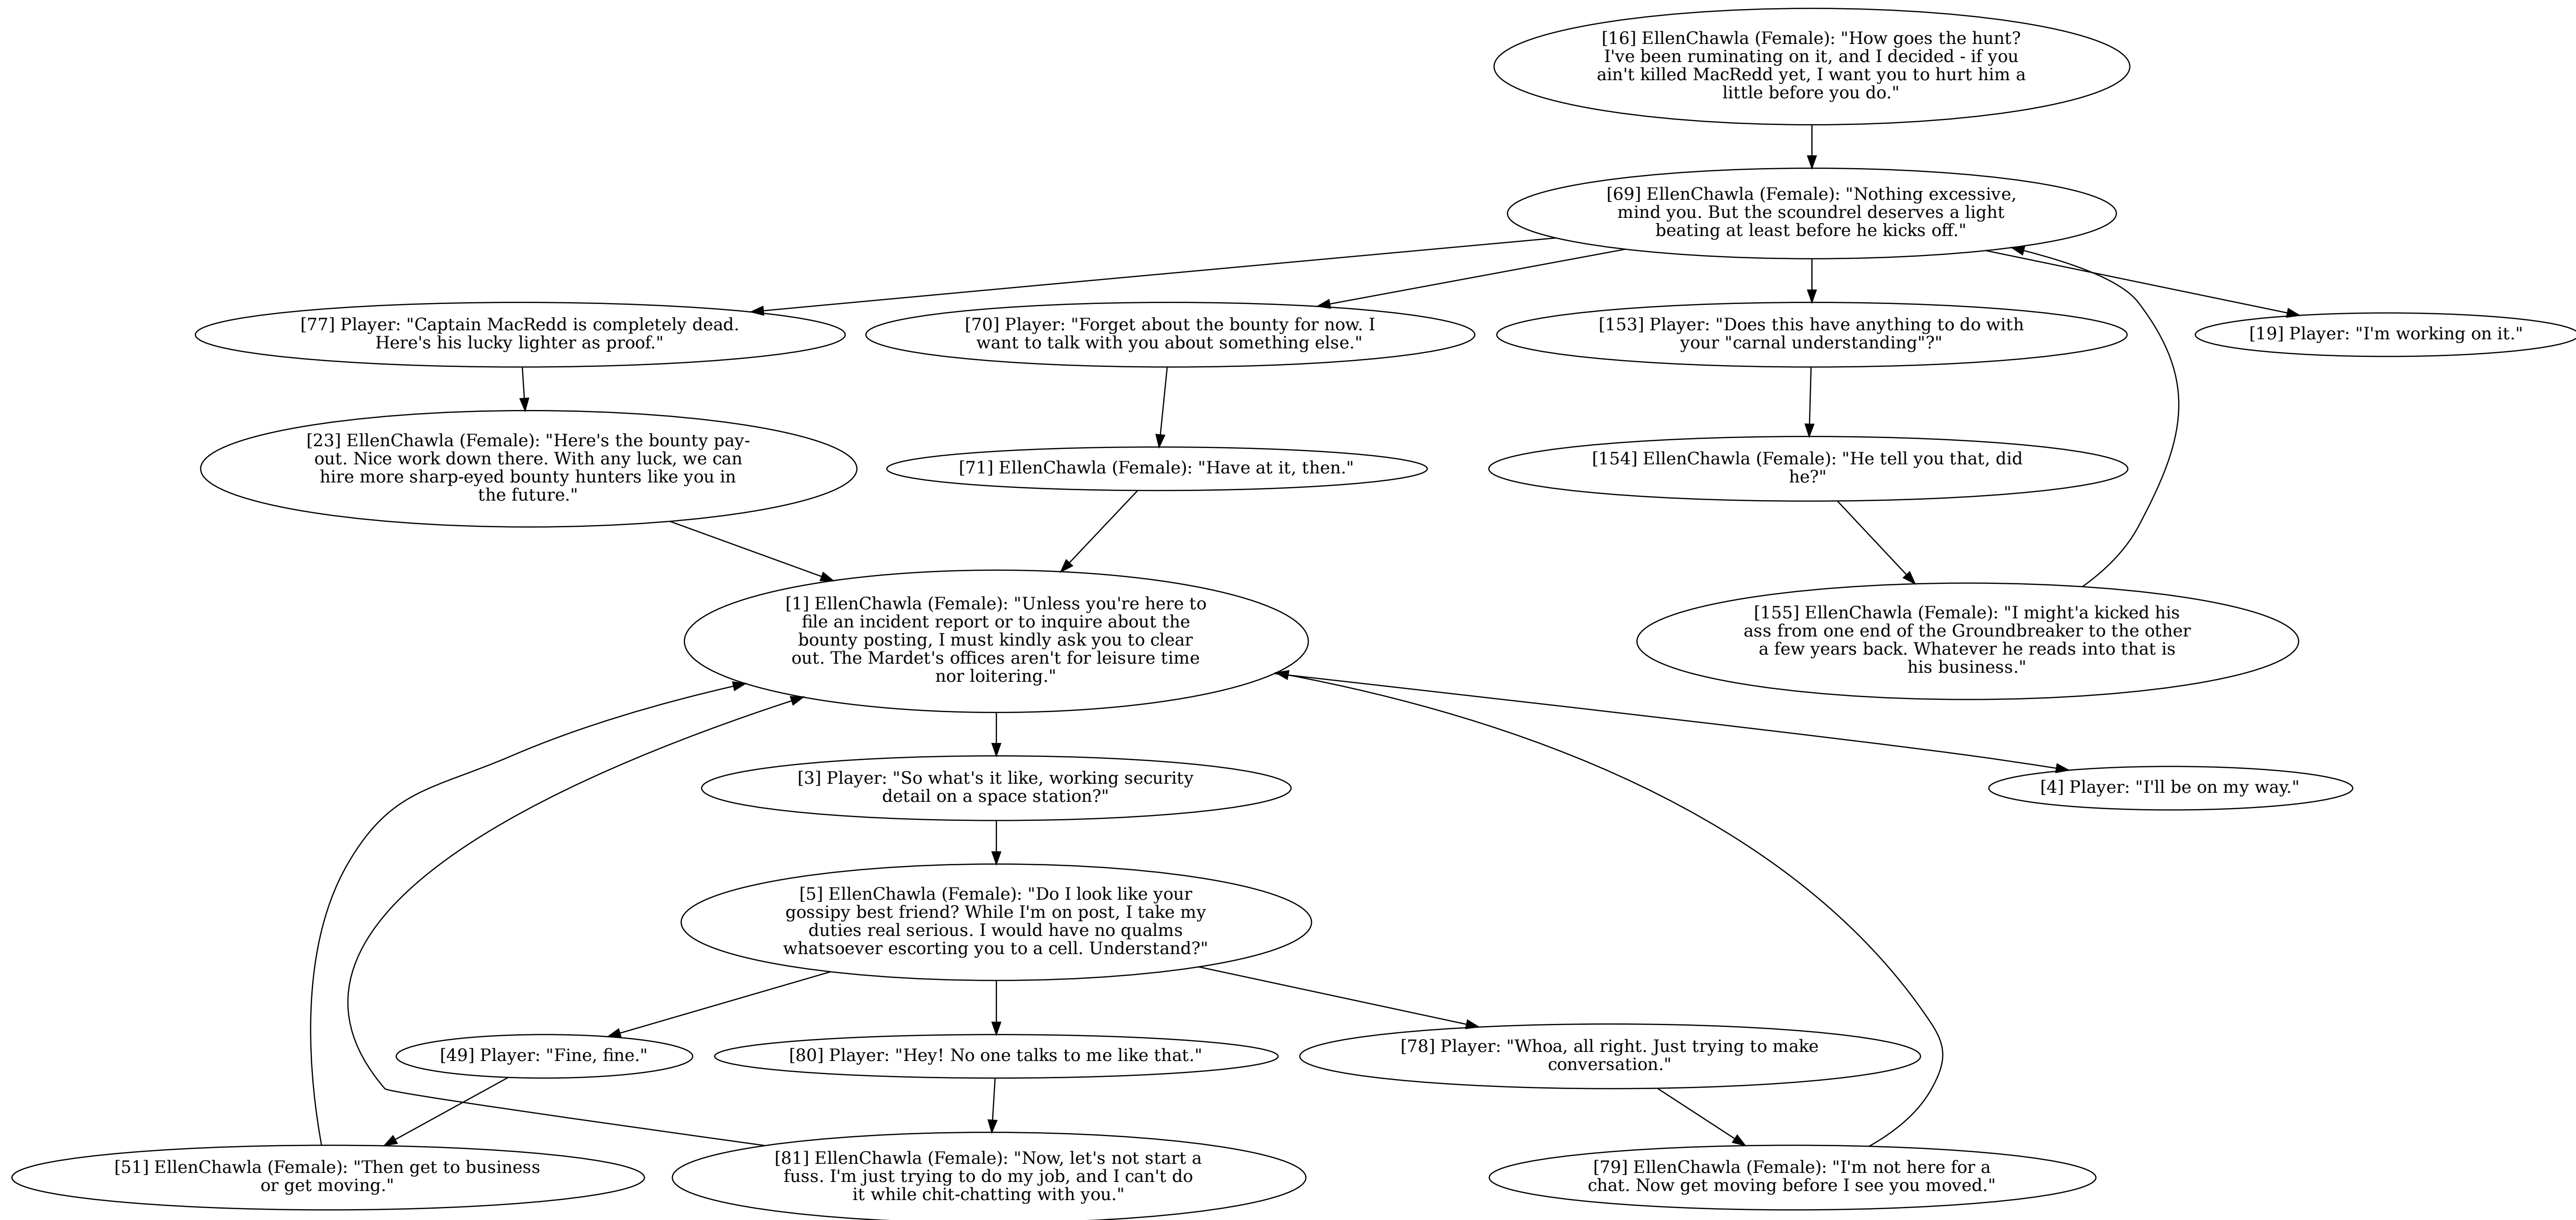

Supplement: software [file 2024.emnlp-main.520.software.zip]

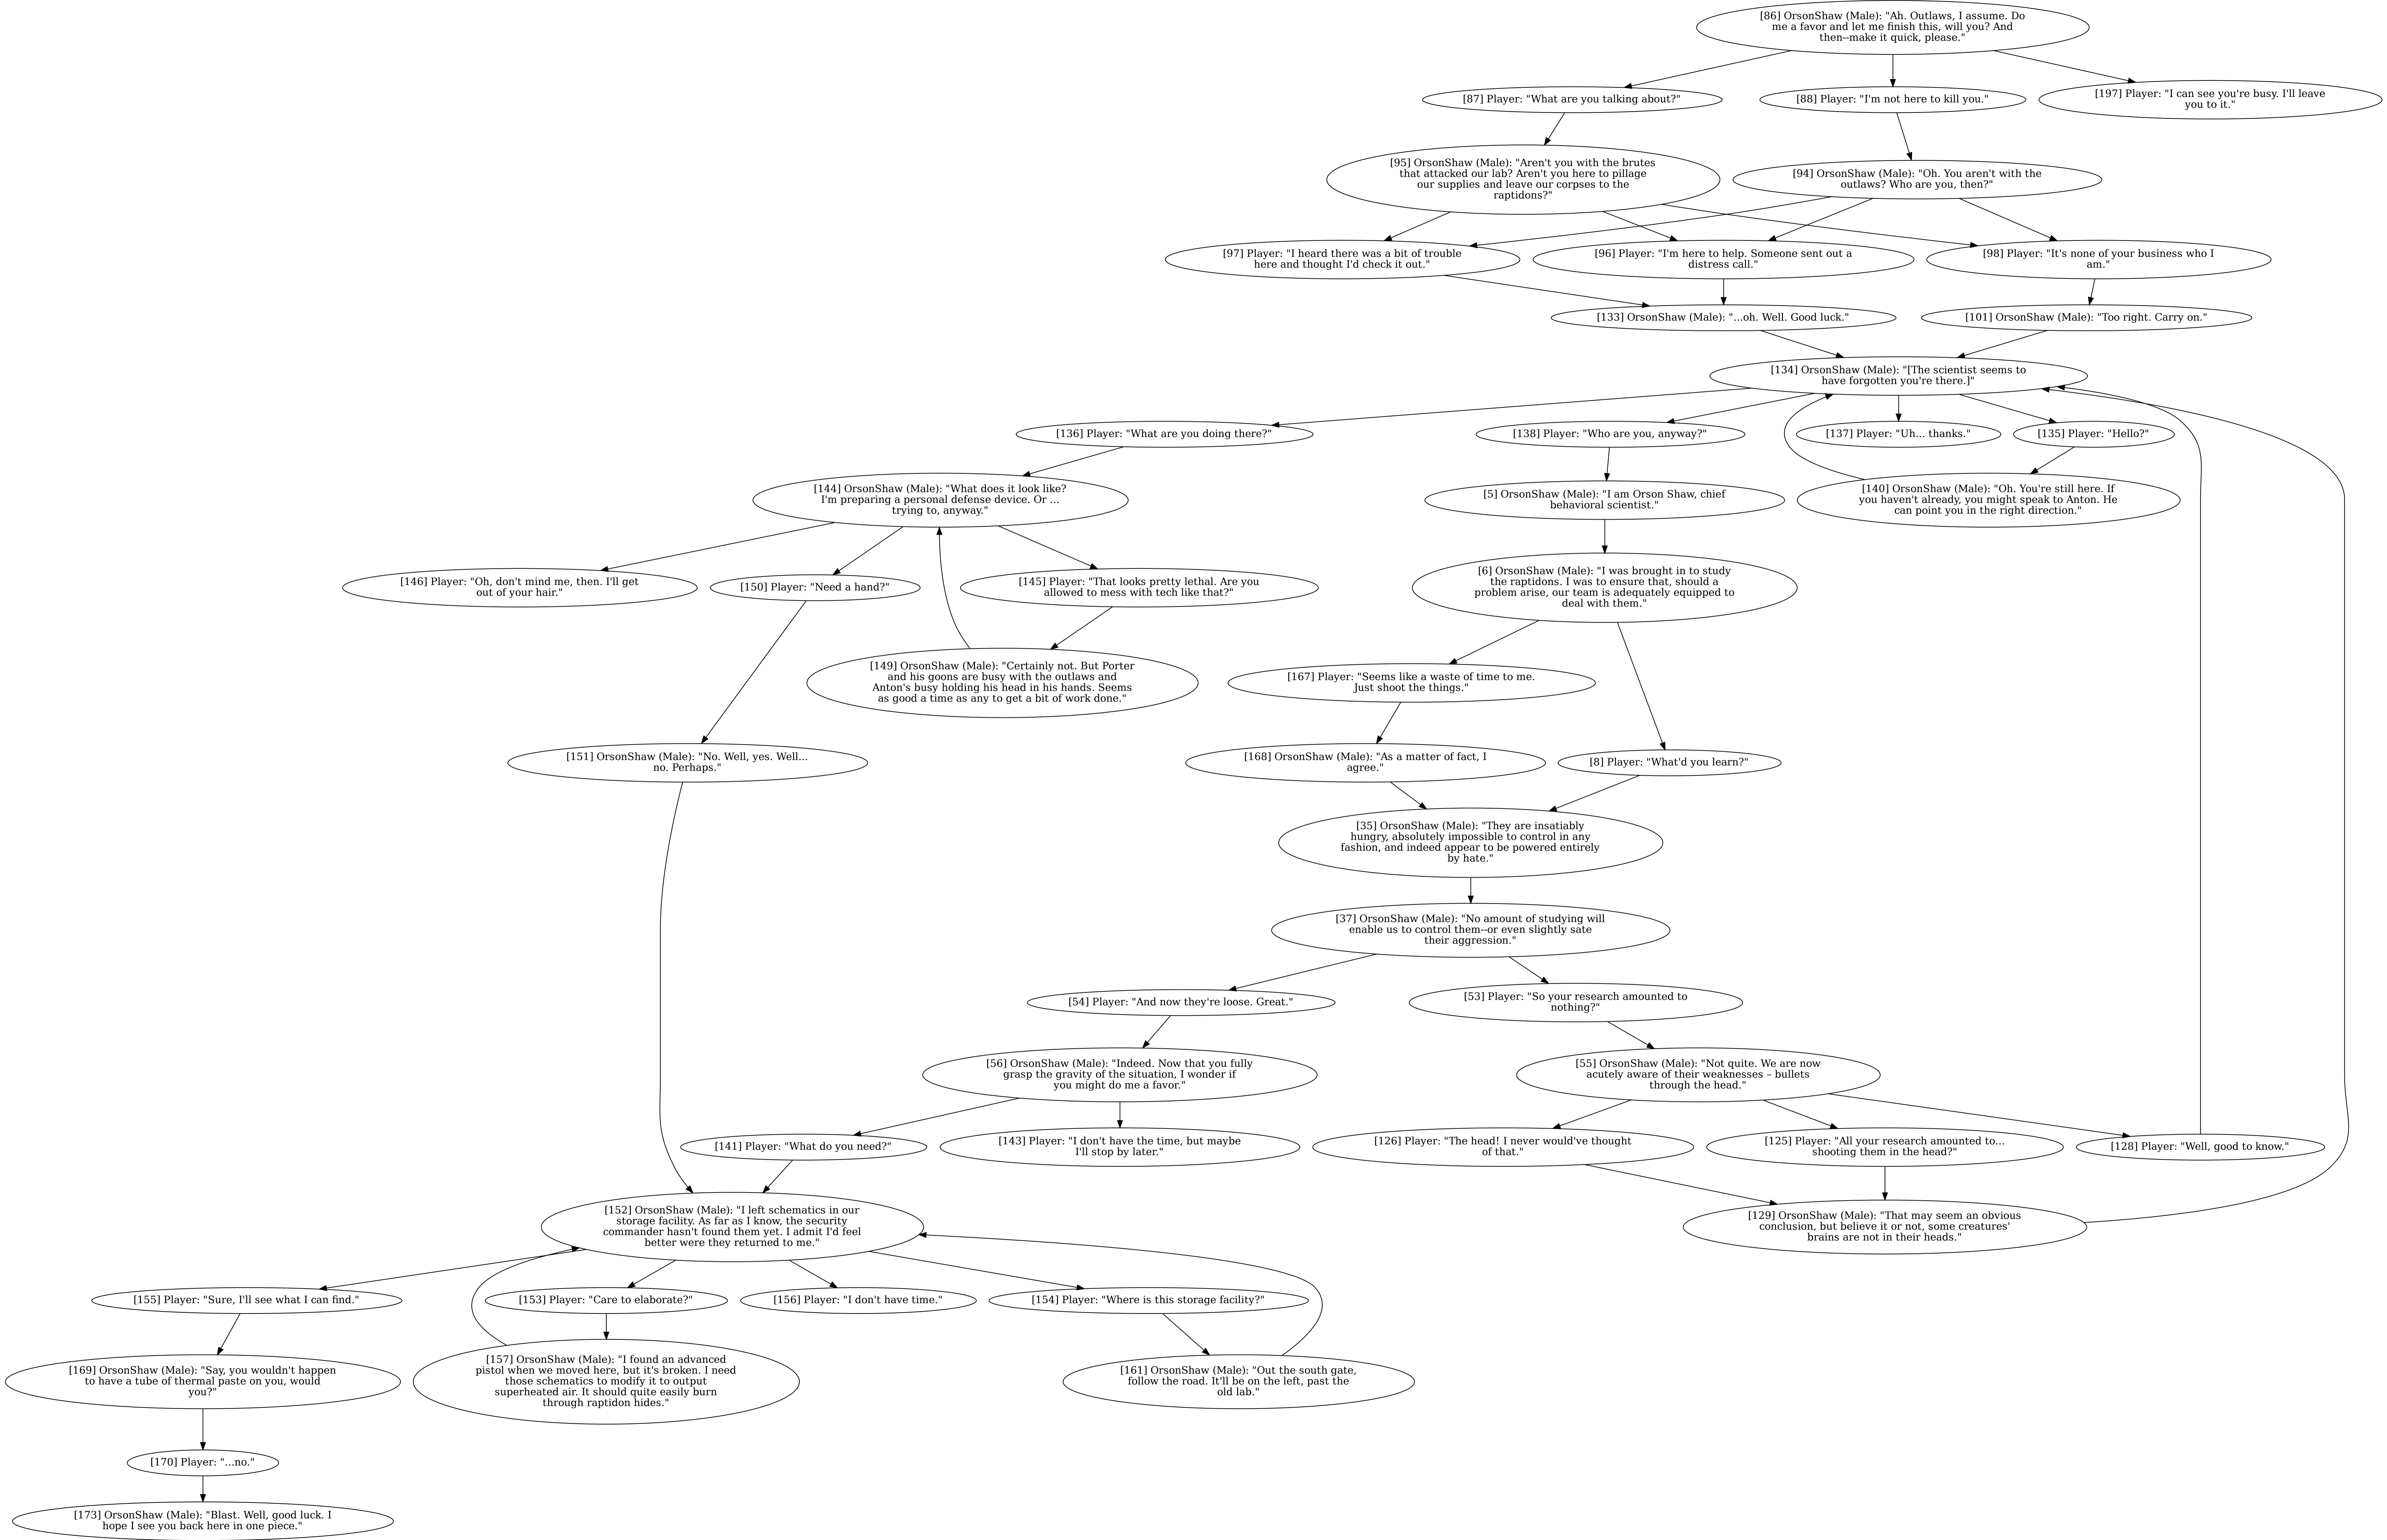

Supplement: software [file 2024.emnlp-main.520.software.zip]

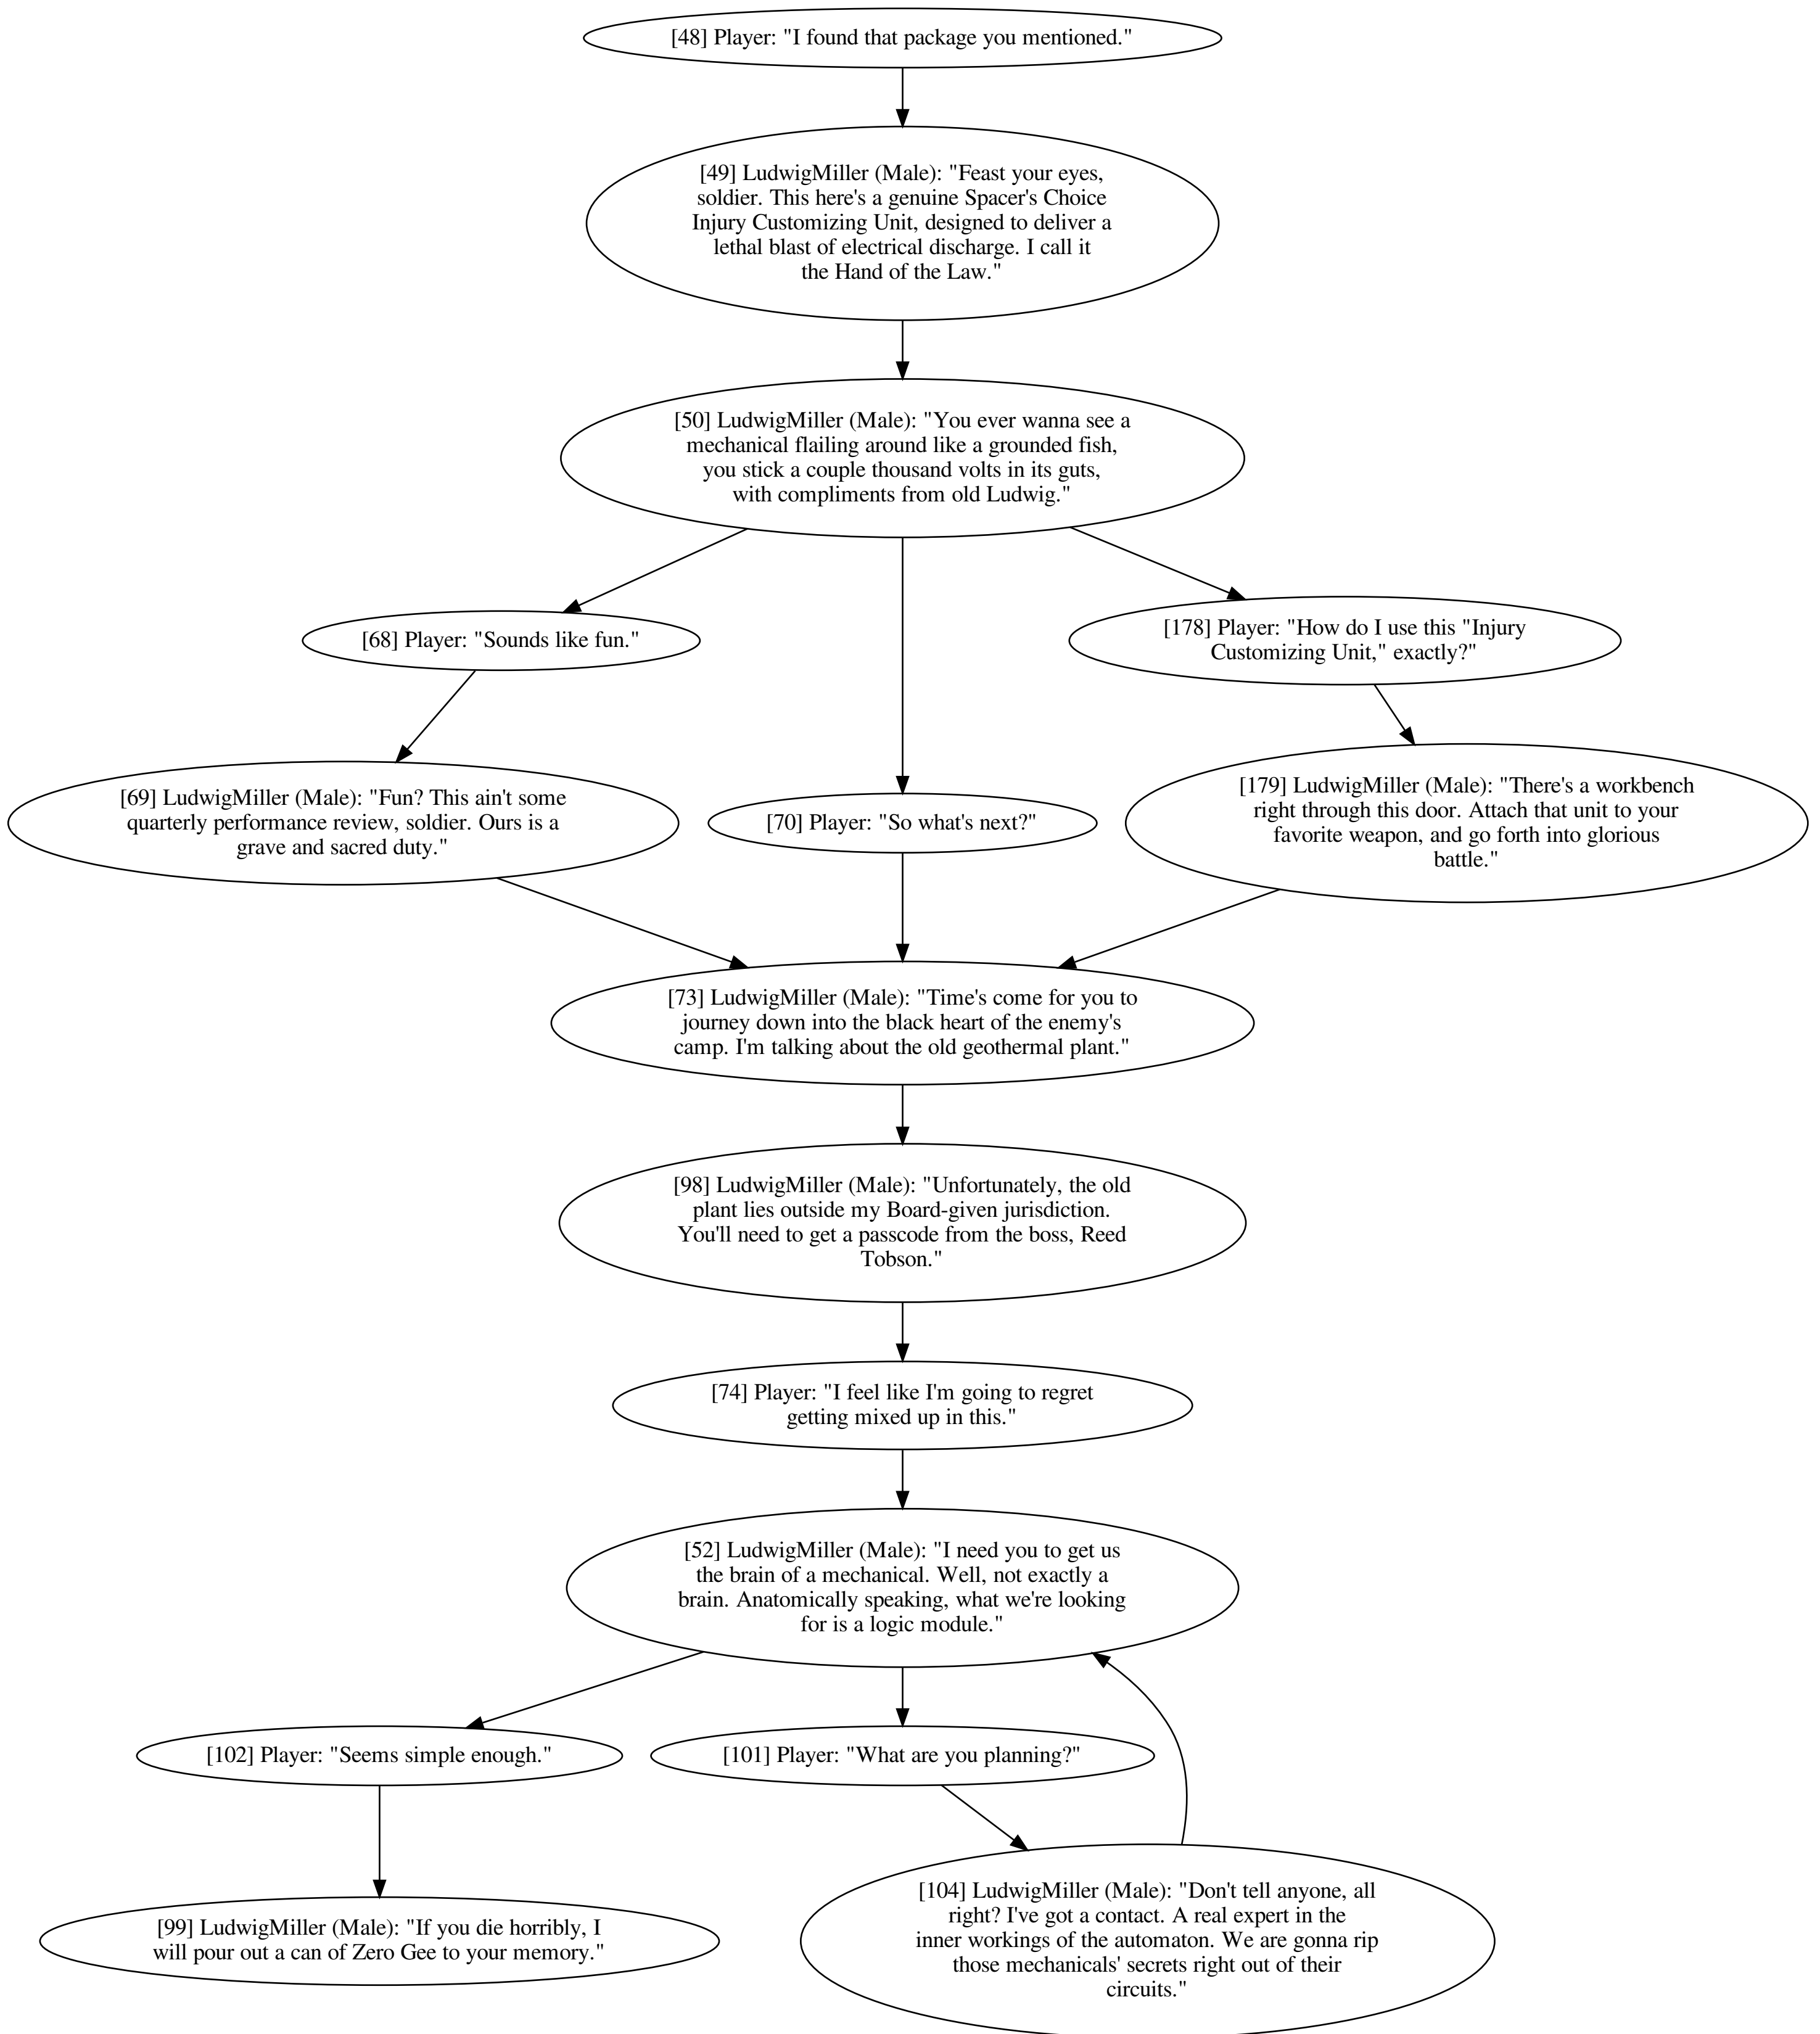

Supplement: software [file 2024.emnlp-main.520.software.zip]

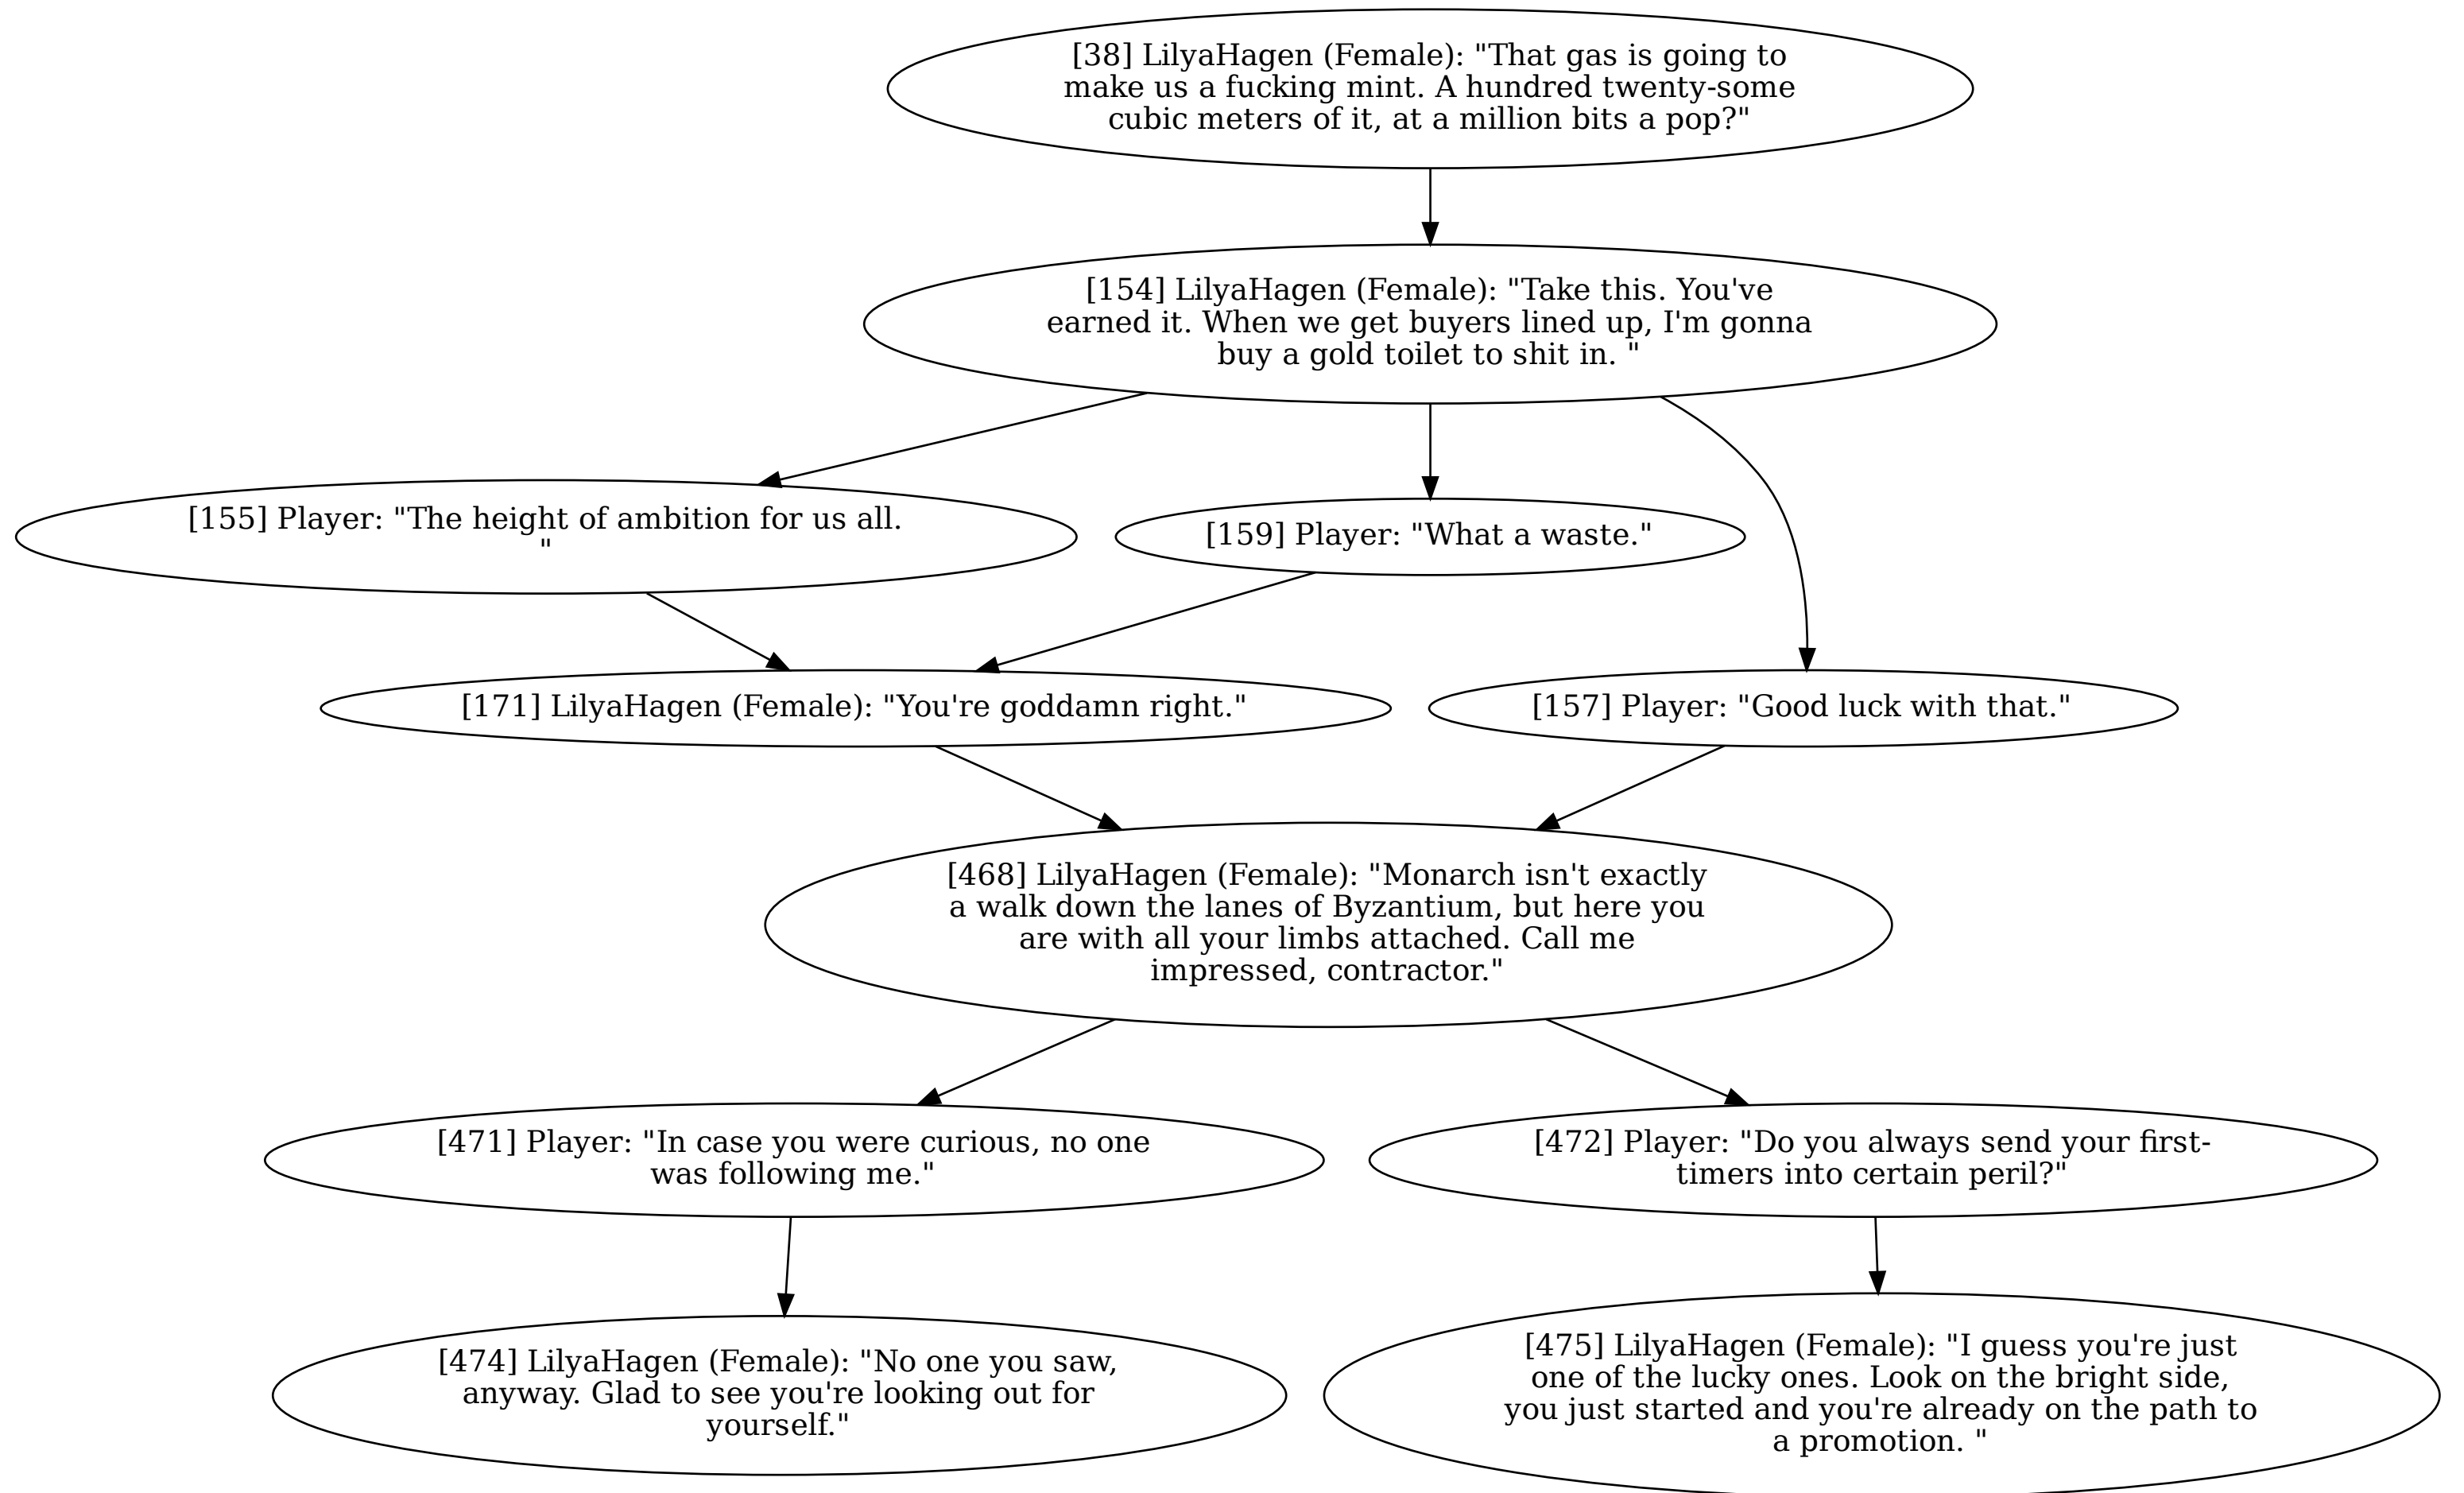

Supplement: software [file 2024.emnlp-main.520.software.zip]

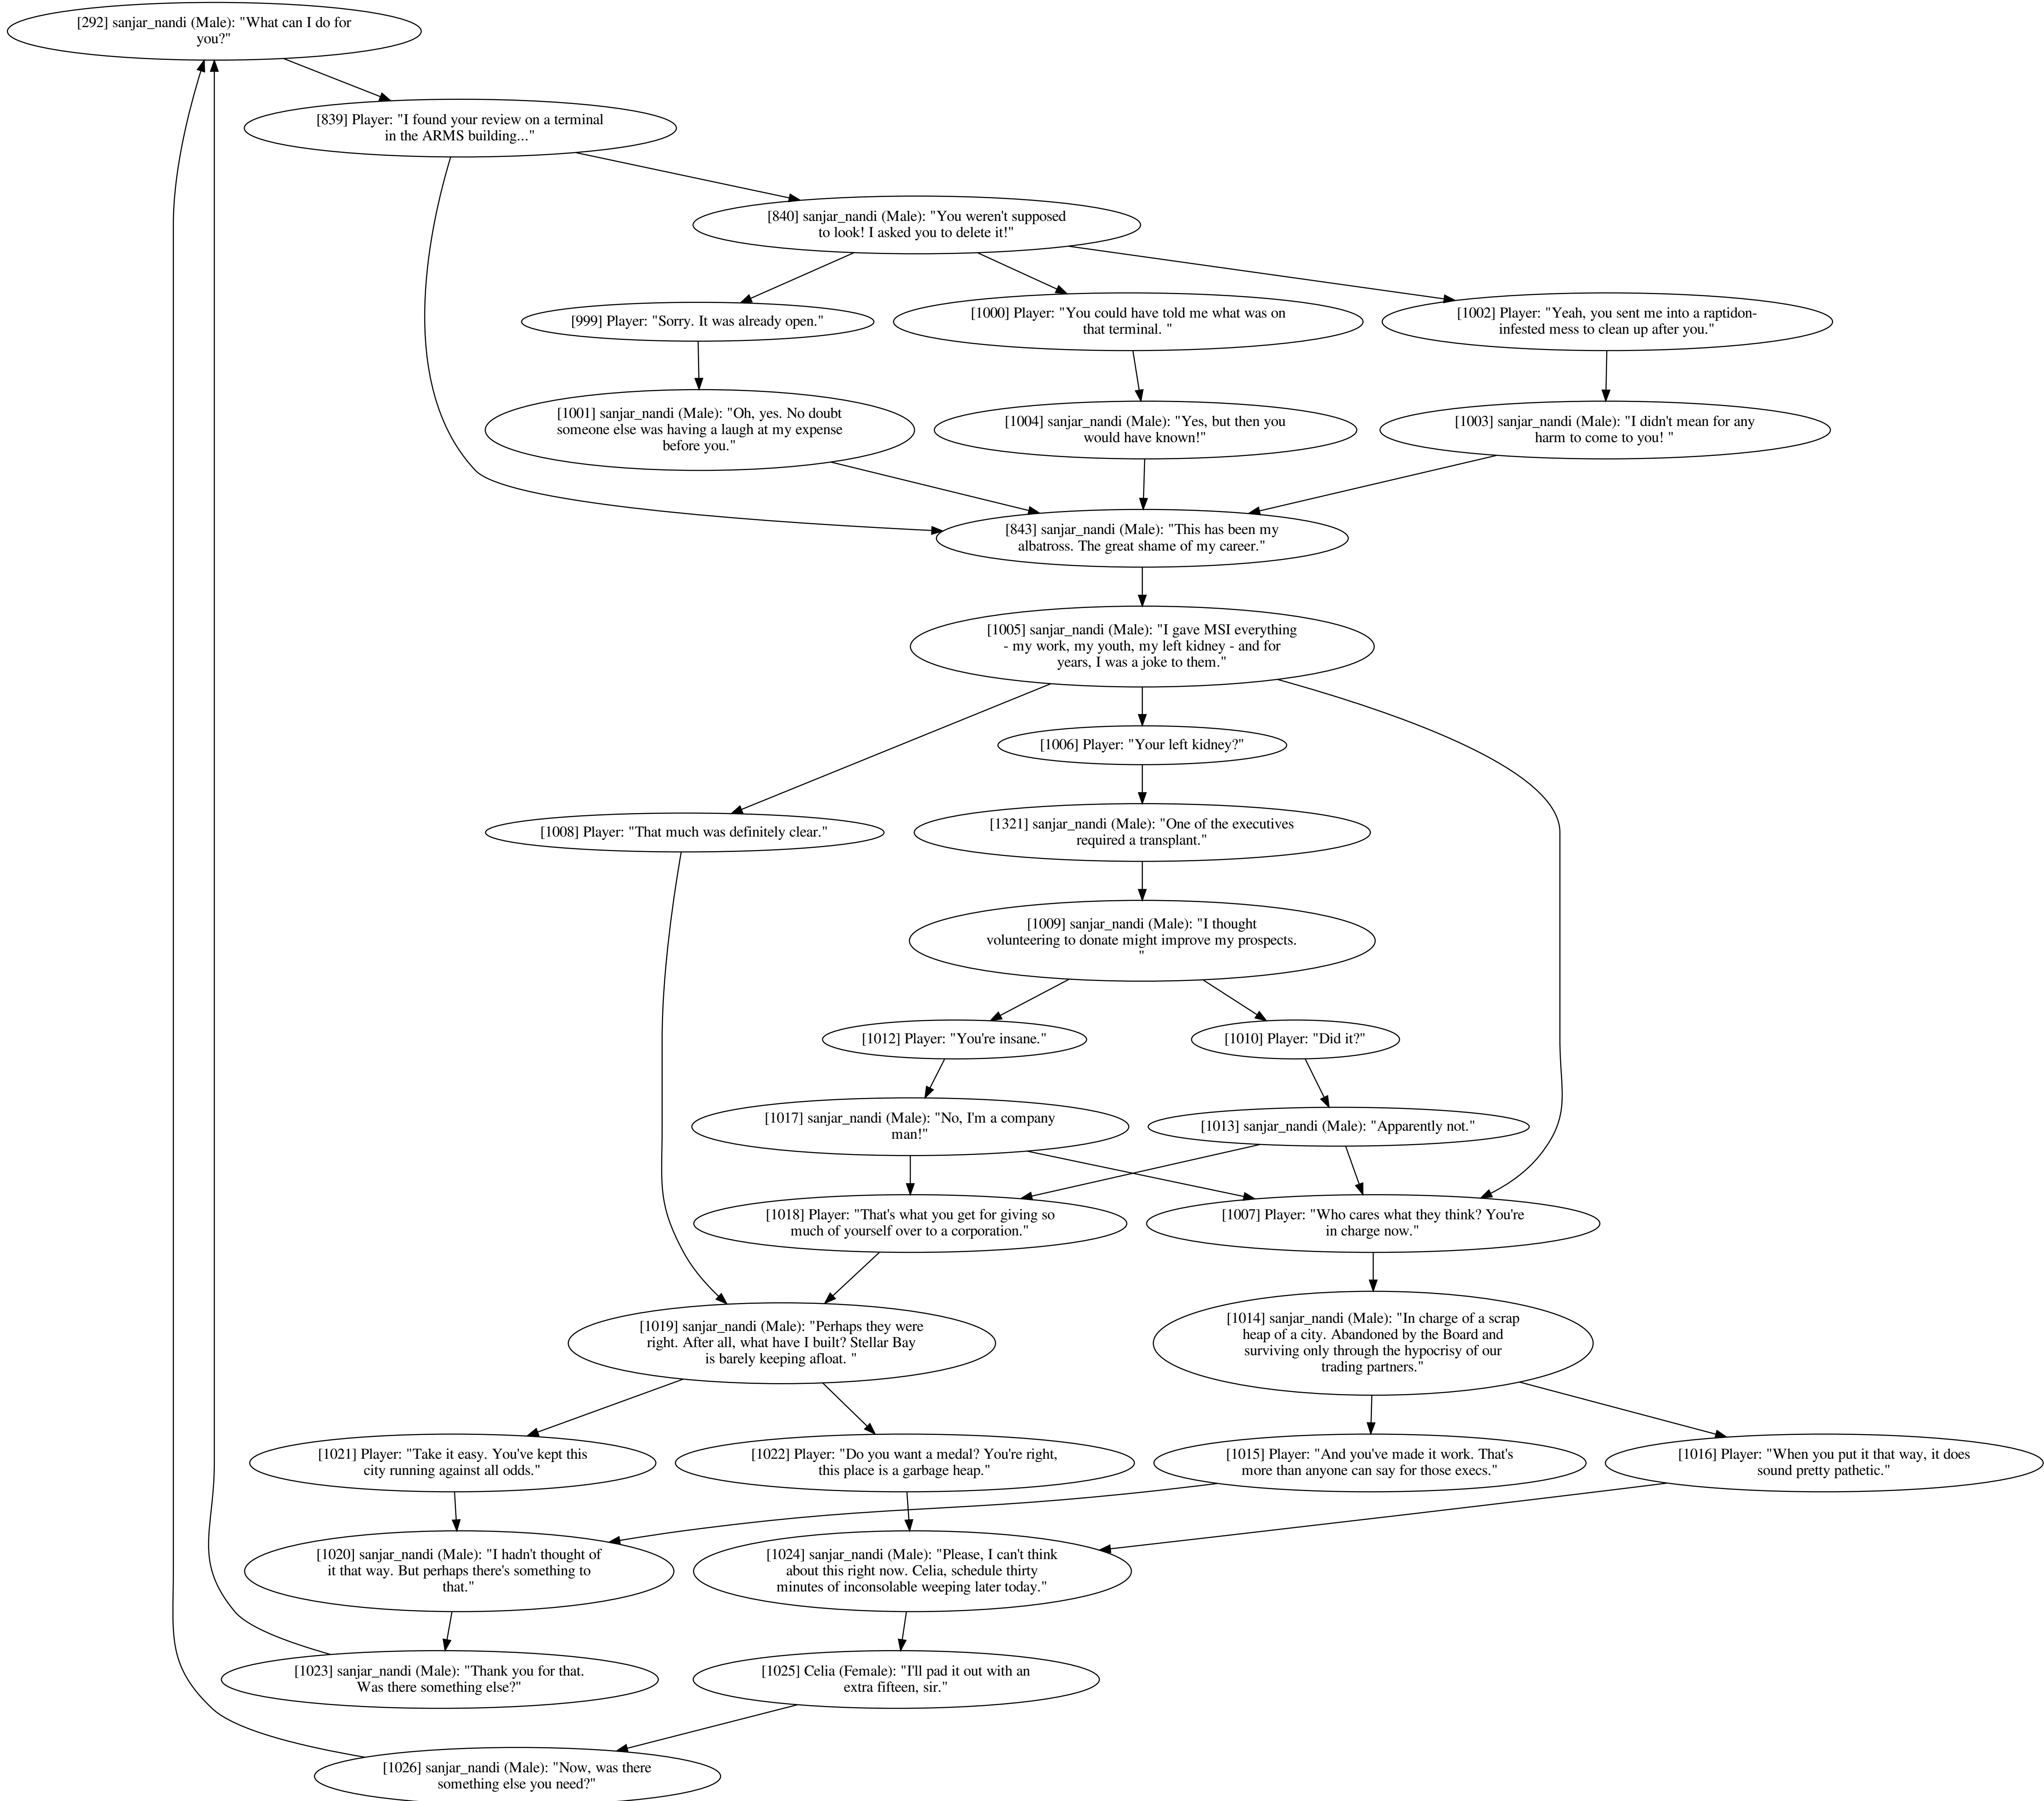

Supplement: software [file 2024.emnlp-main.520.software.zip]

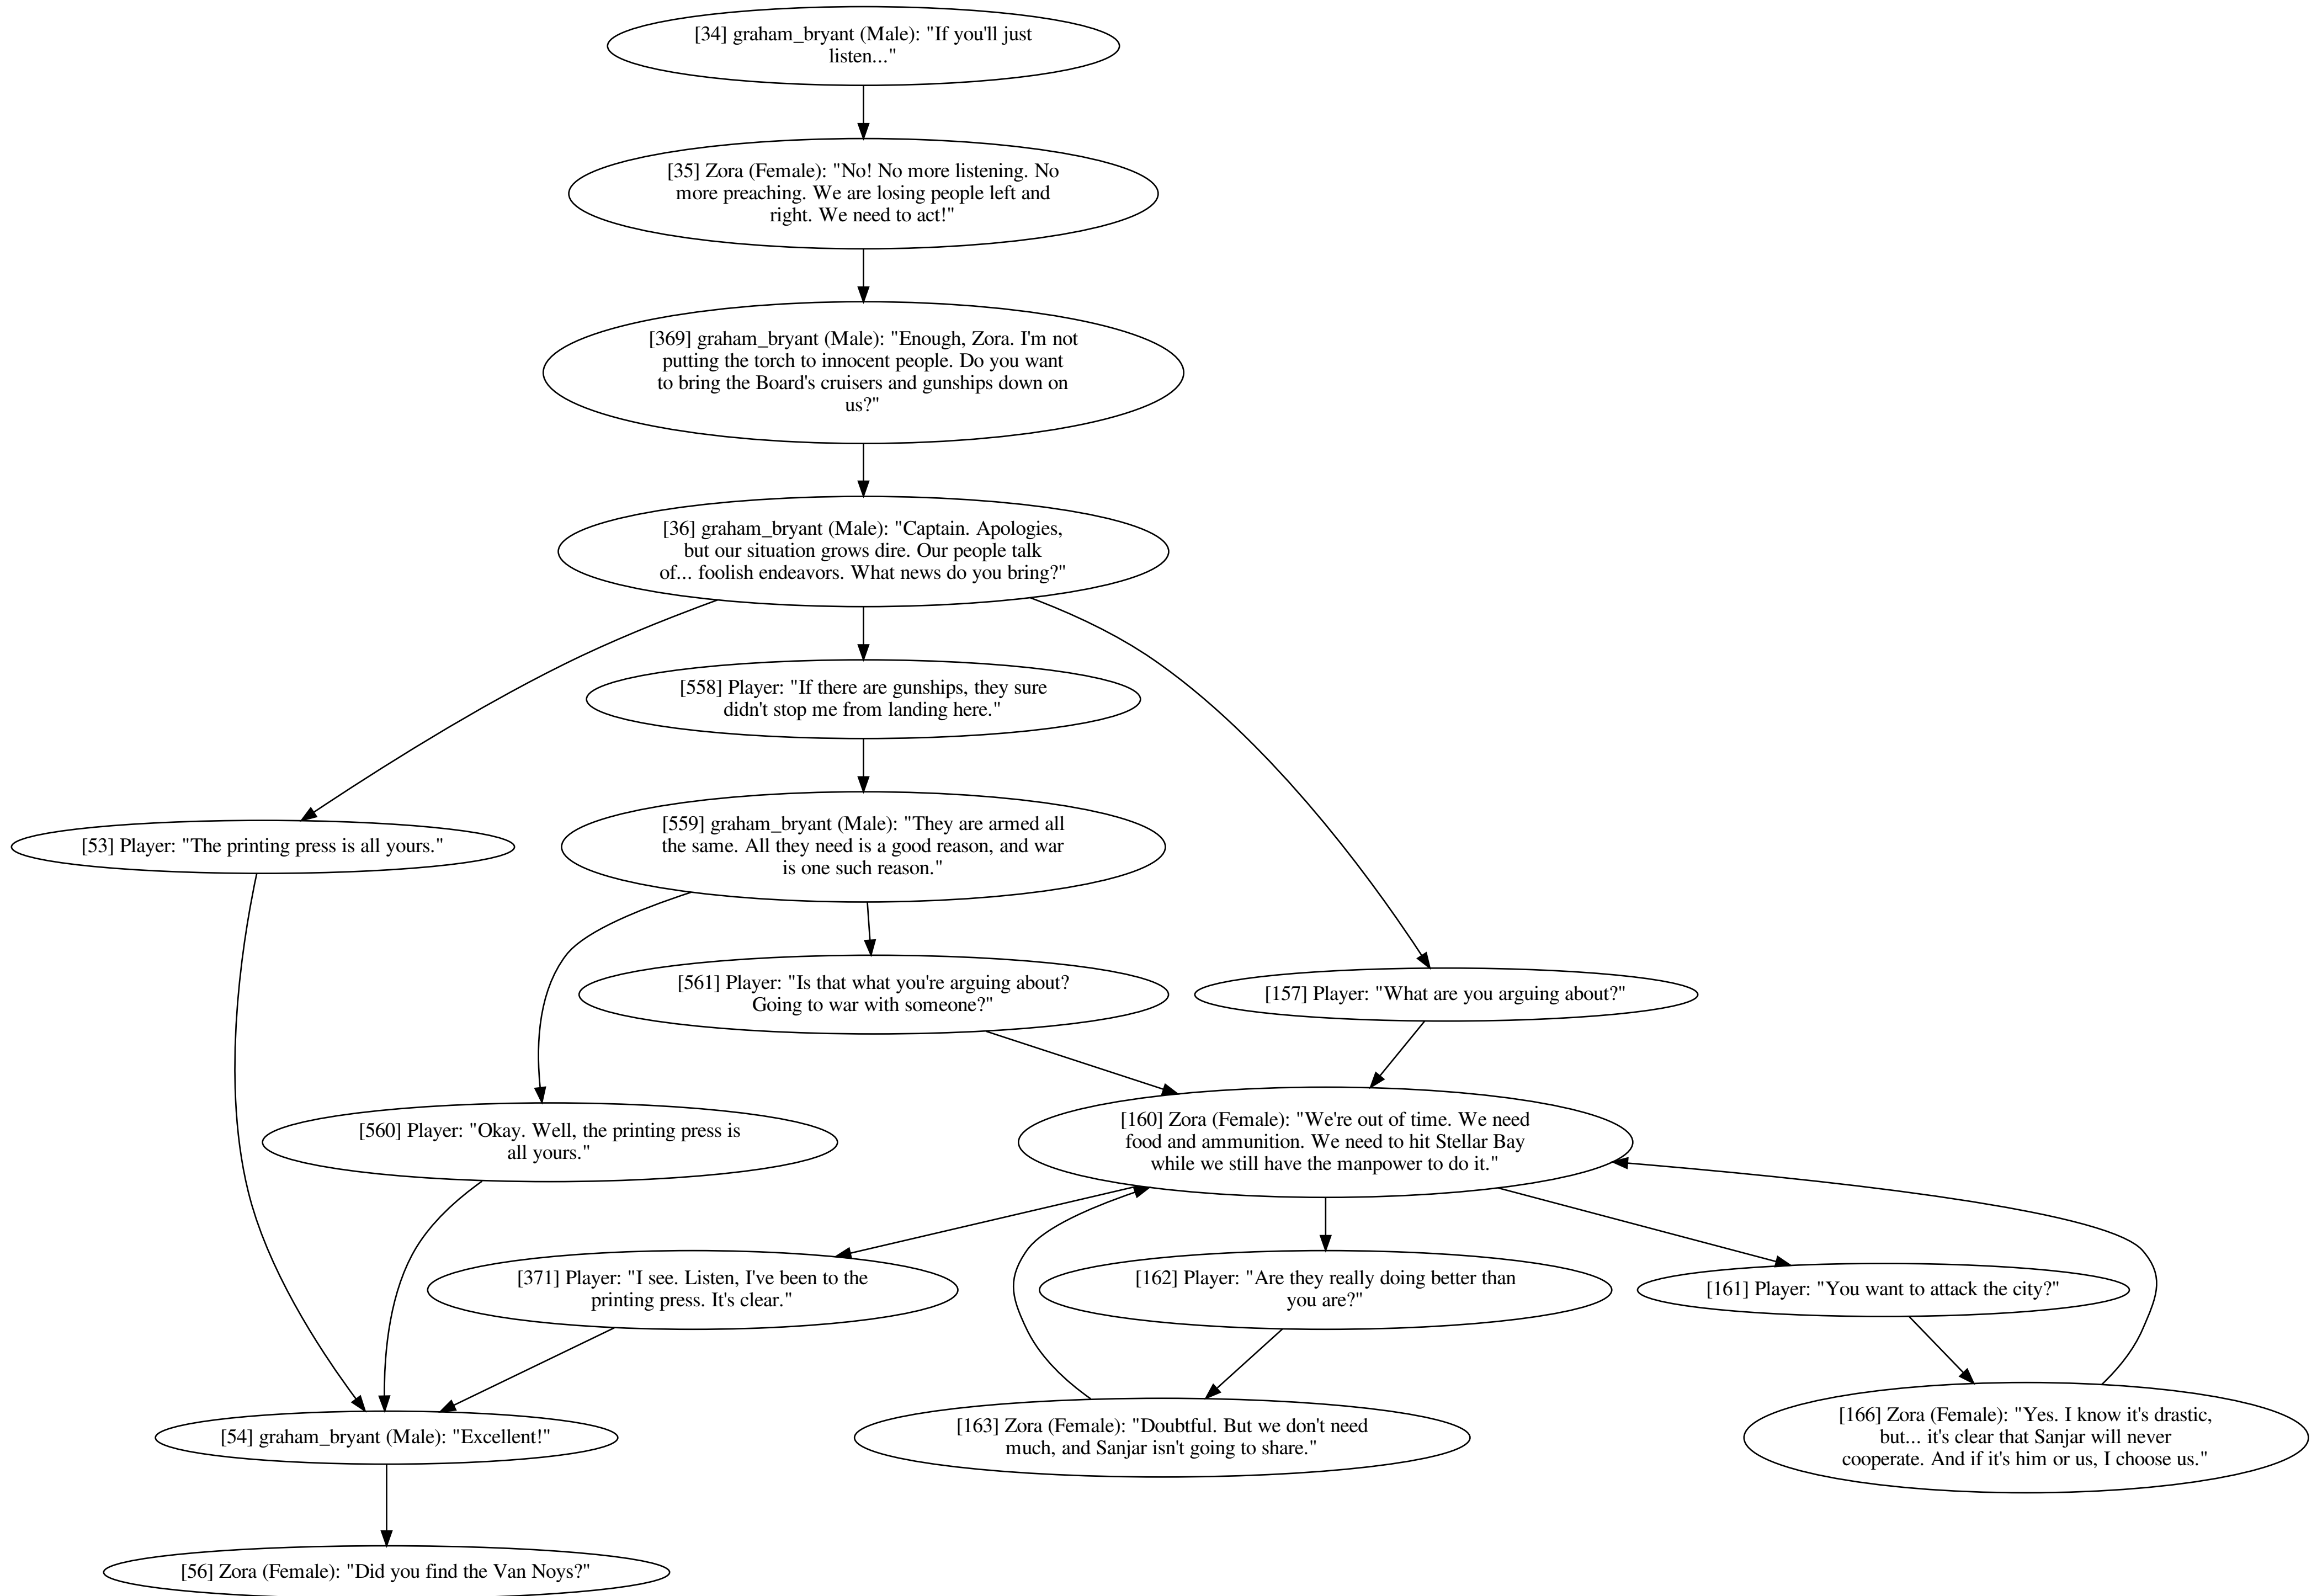

Supplement: software [file 2024.emnlp-main.520.software.zip]

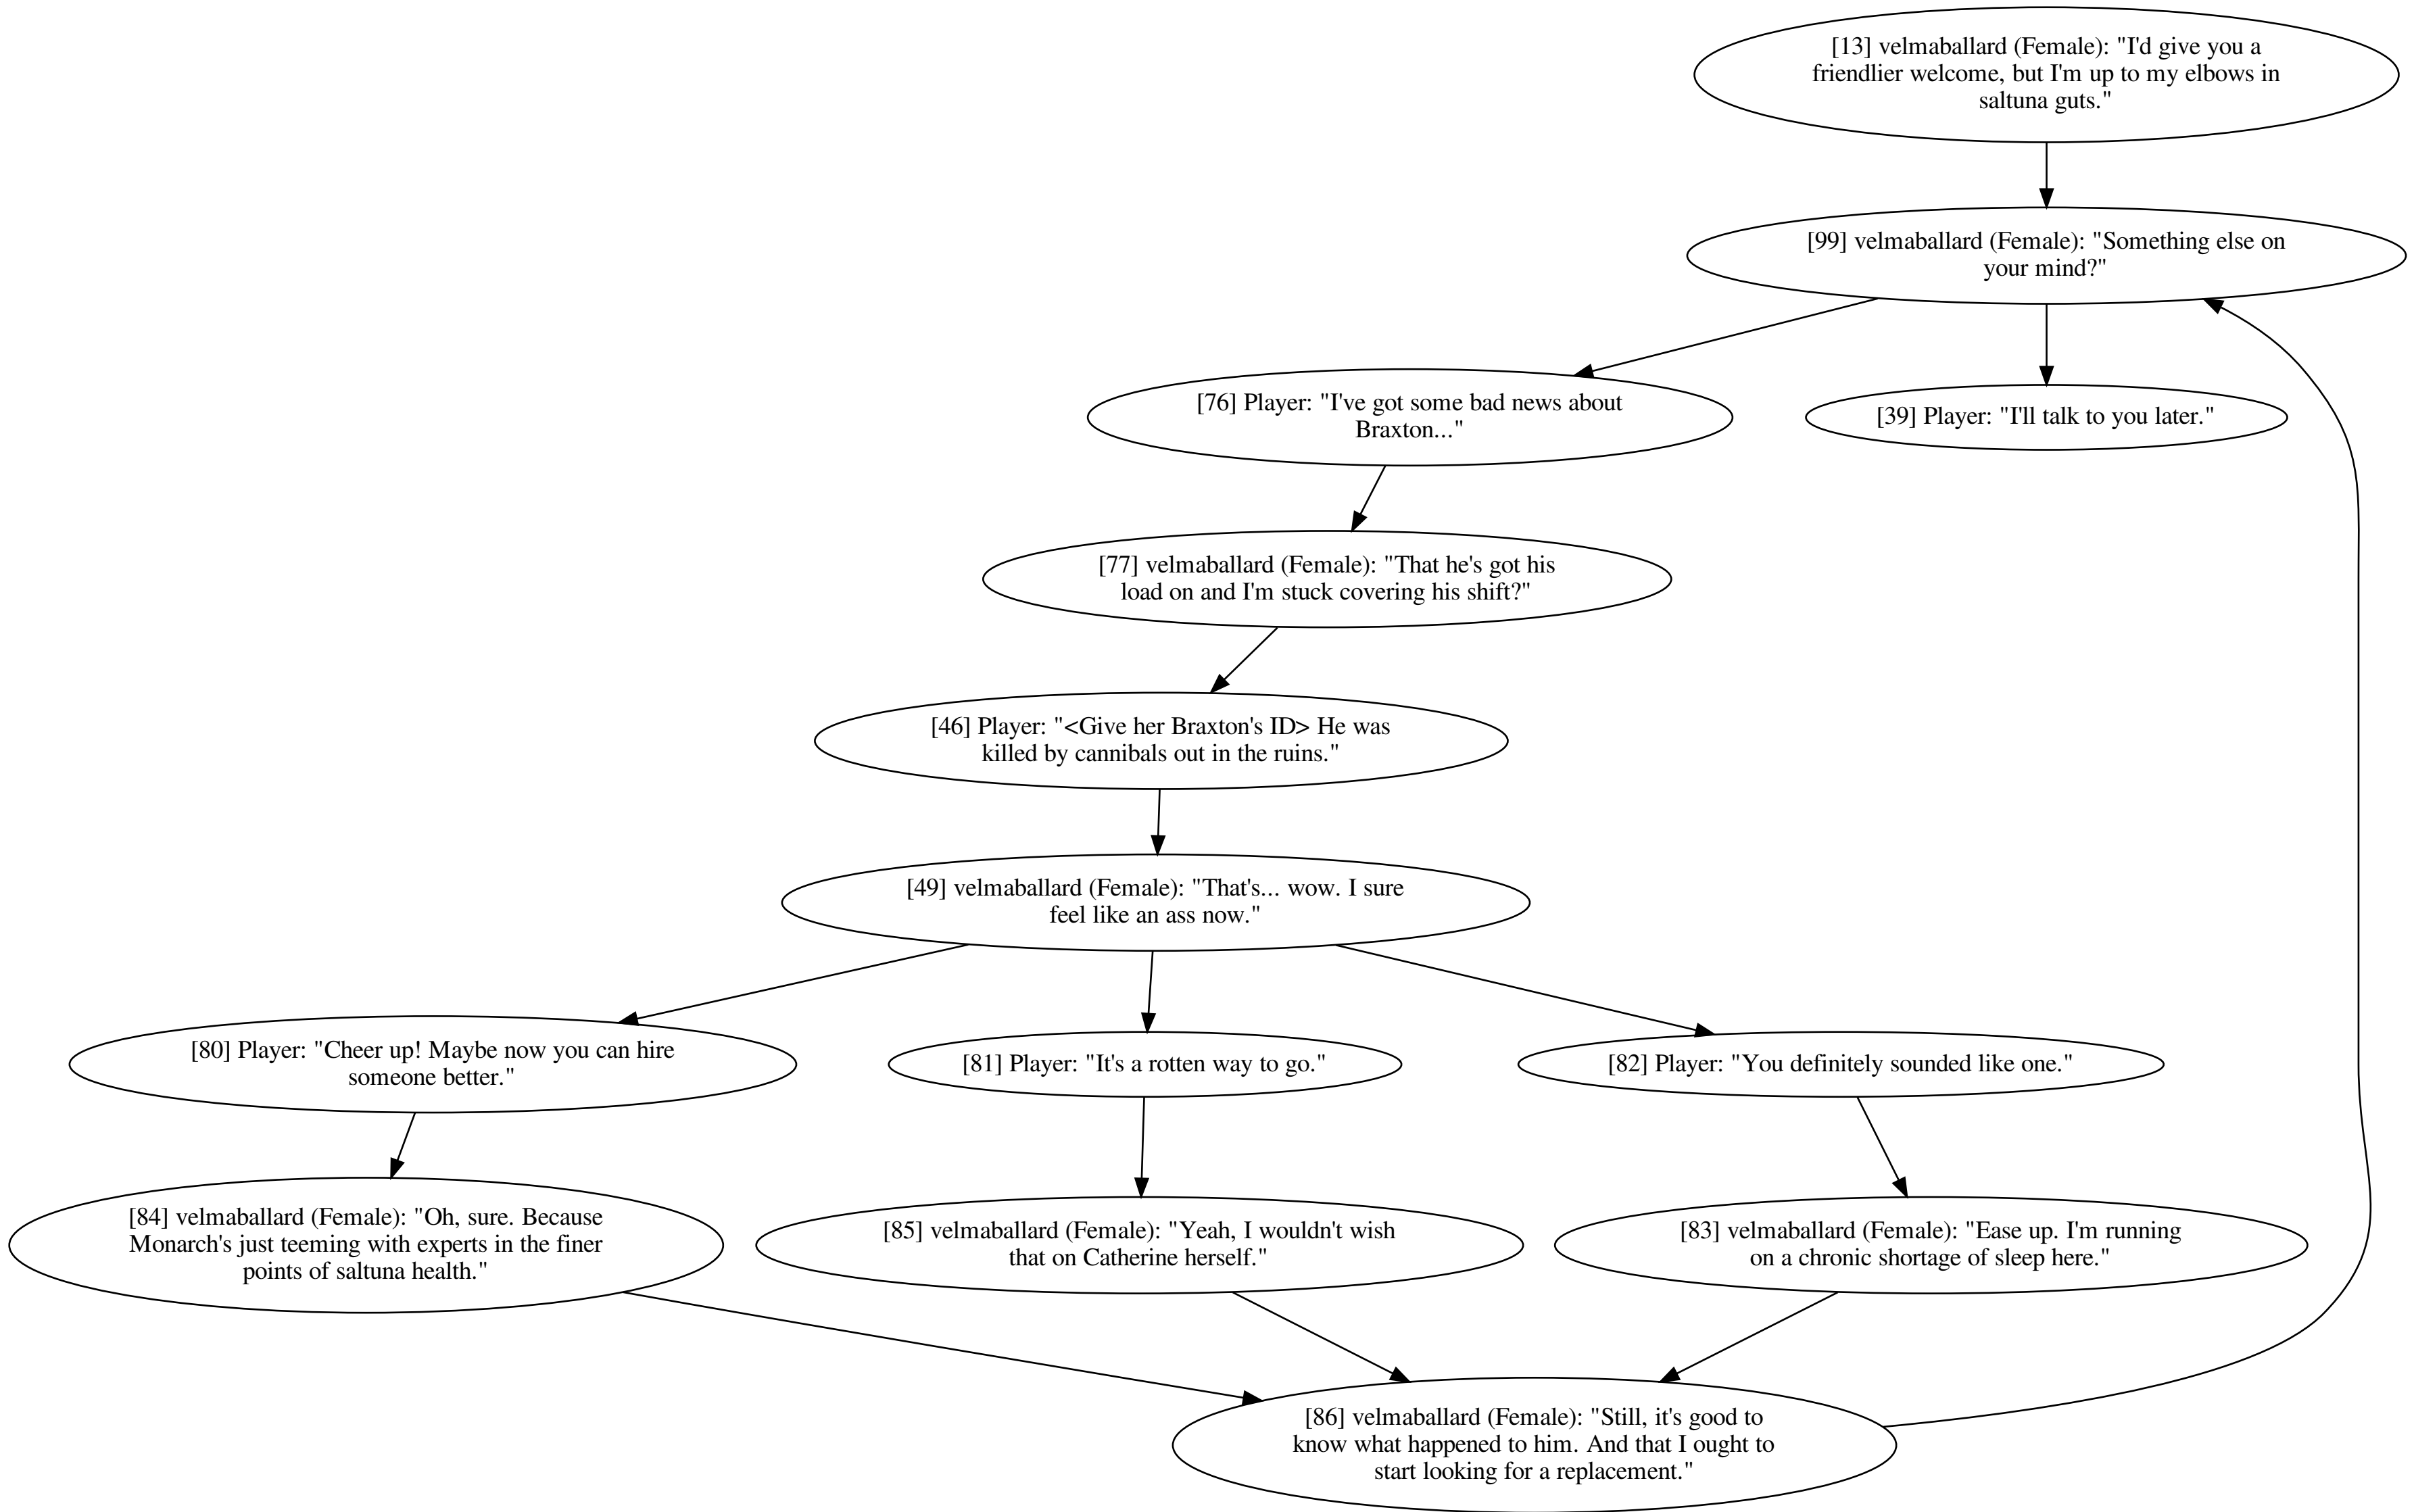

Supplement: software [file 2024.emnlp-main.520.software.zip]

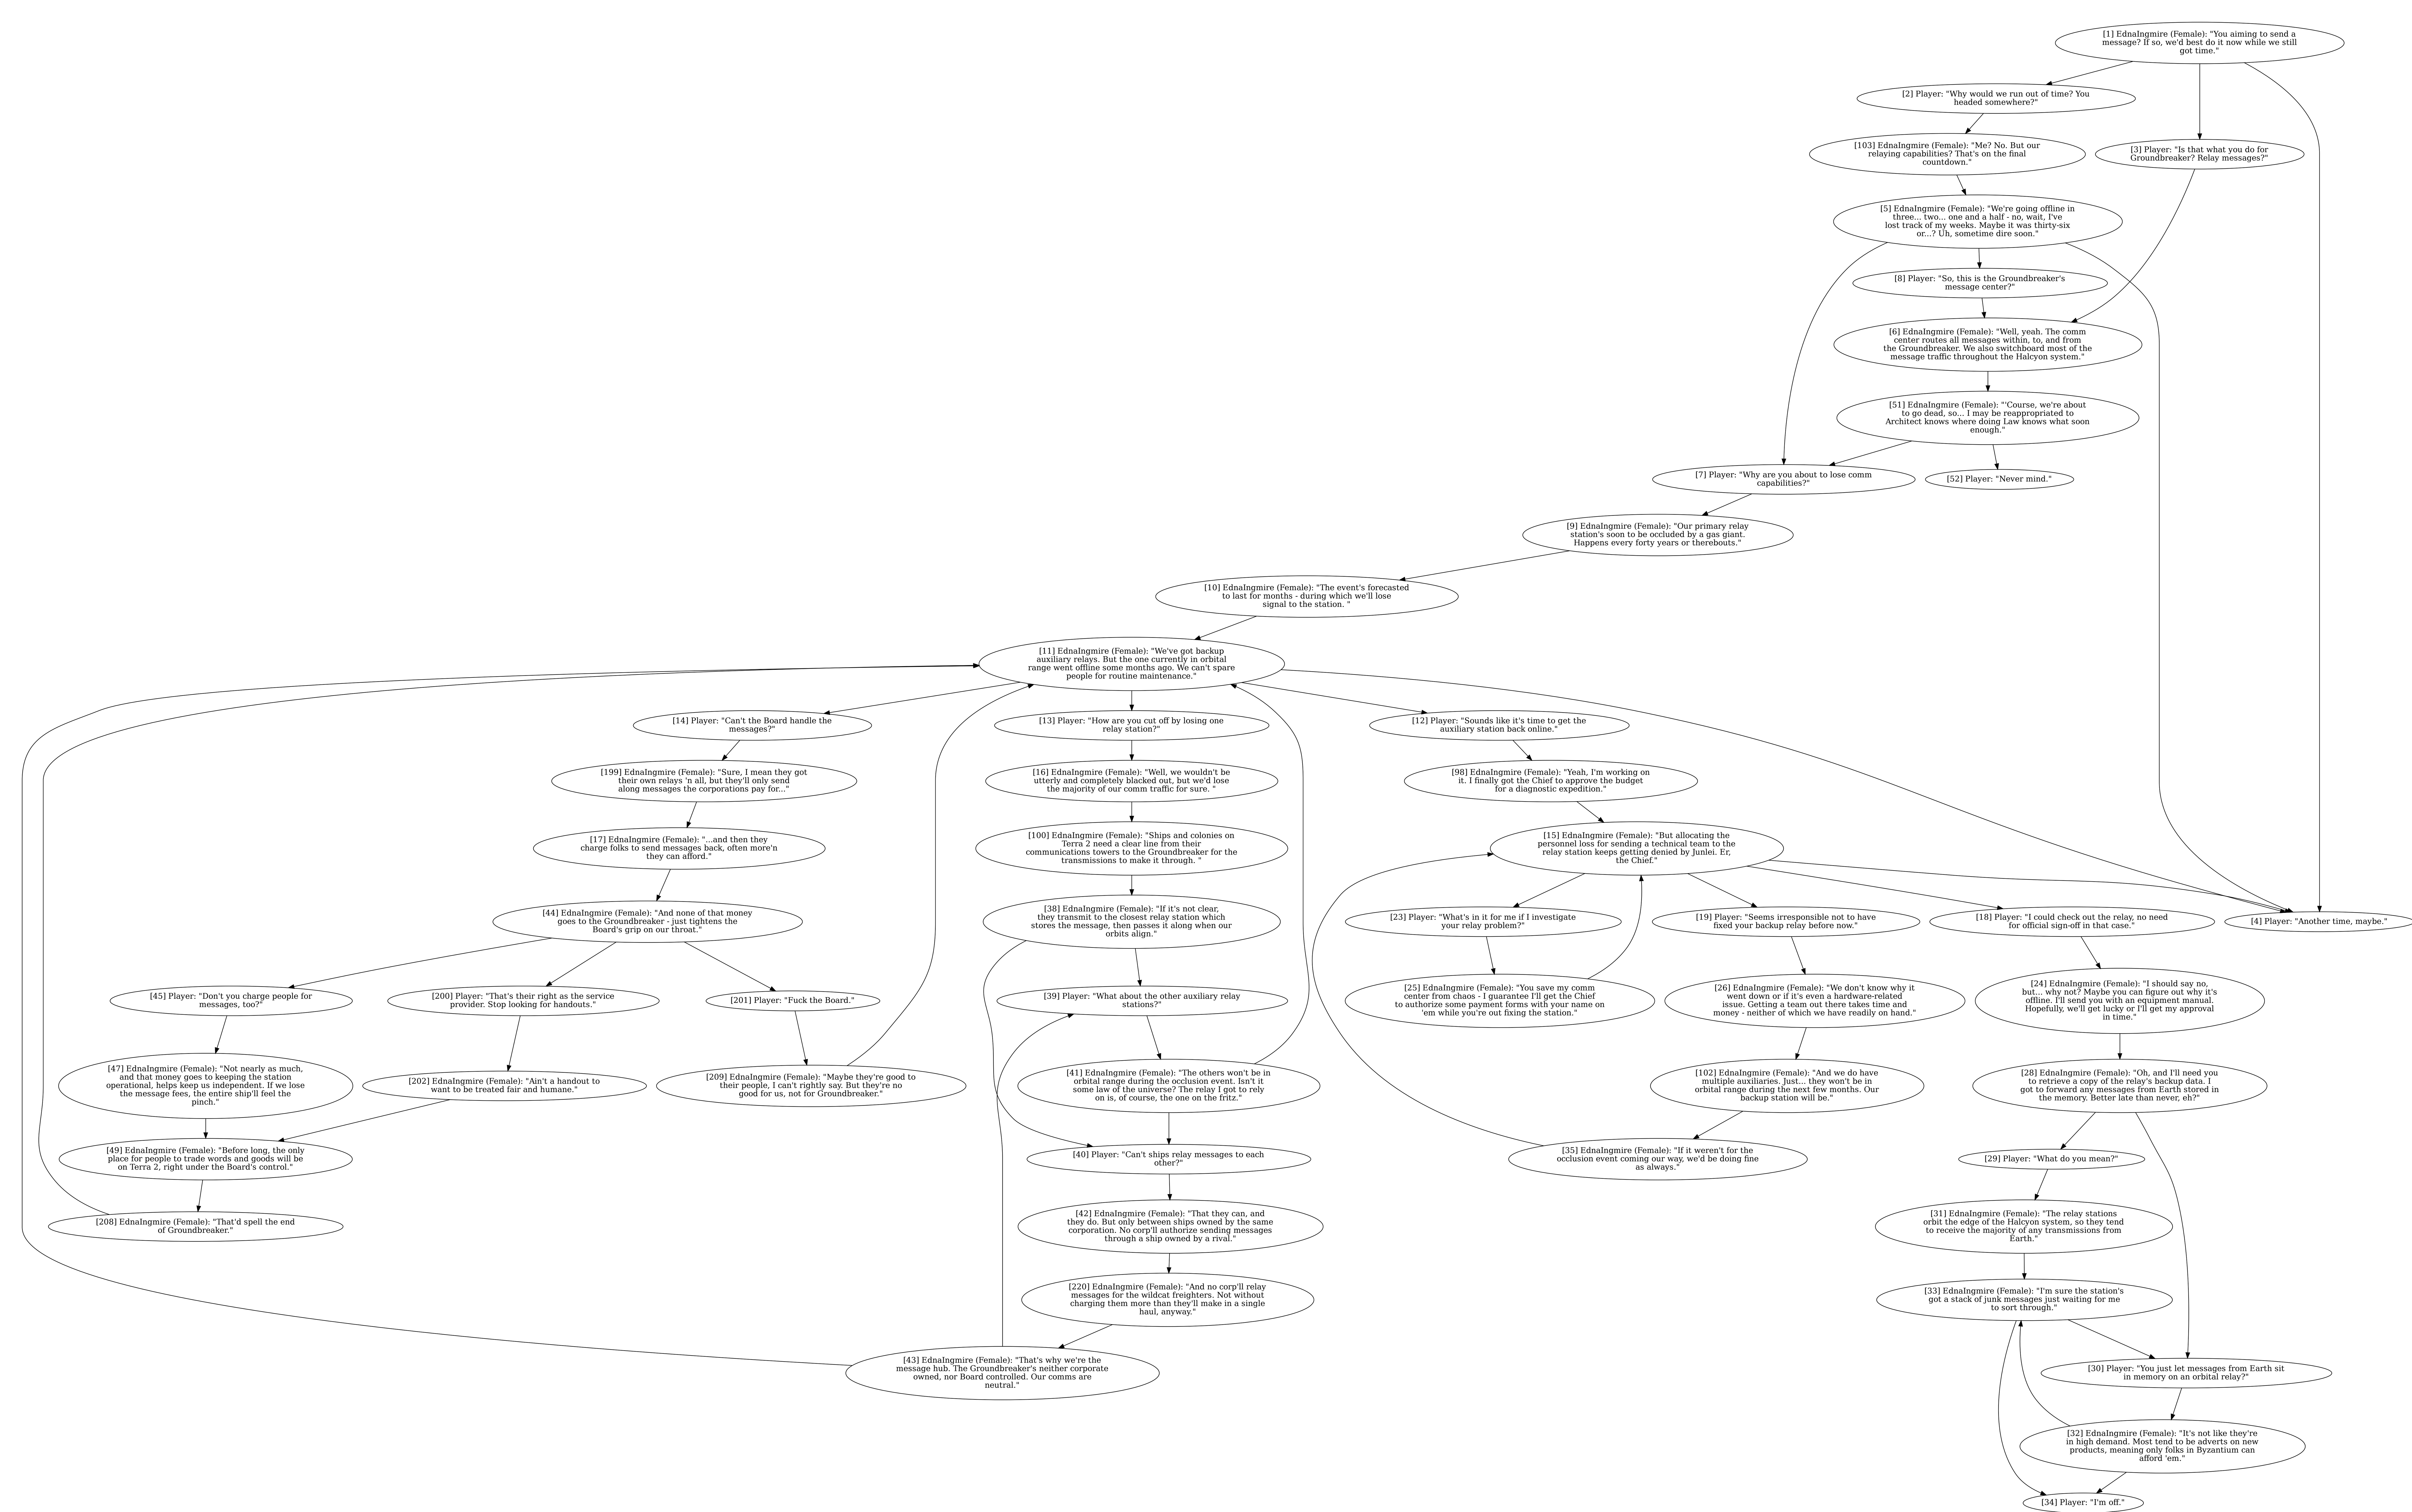

Supplement: software [file 2024.emnlp-main.520.software.zip]

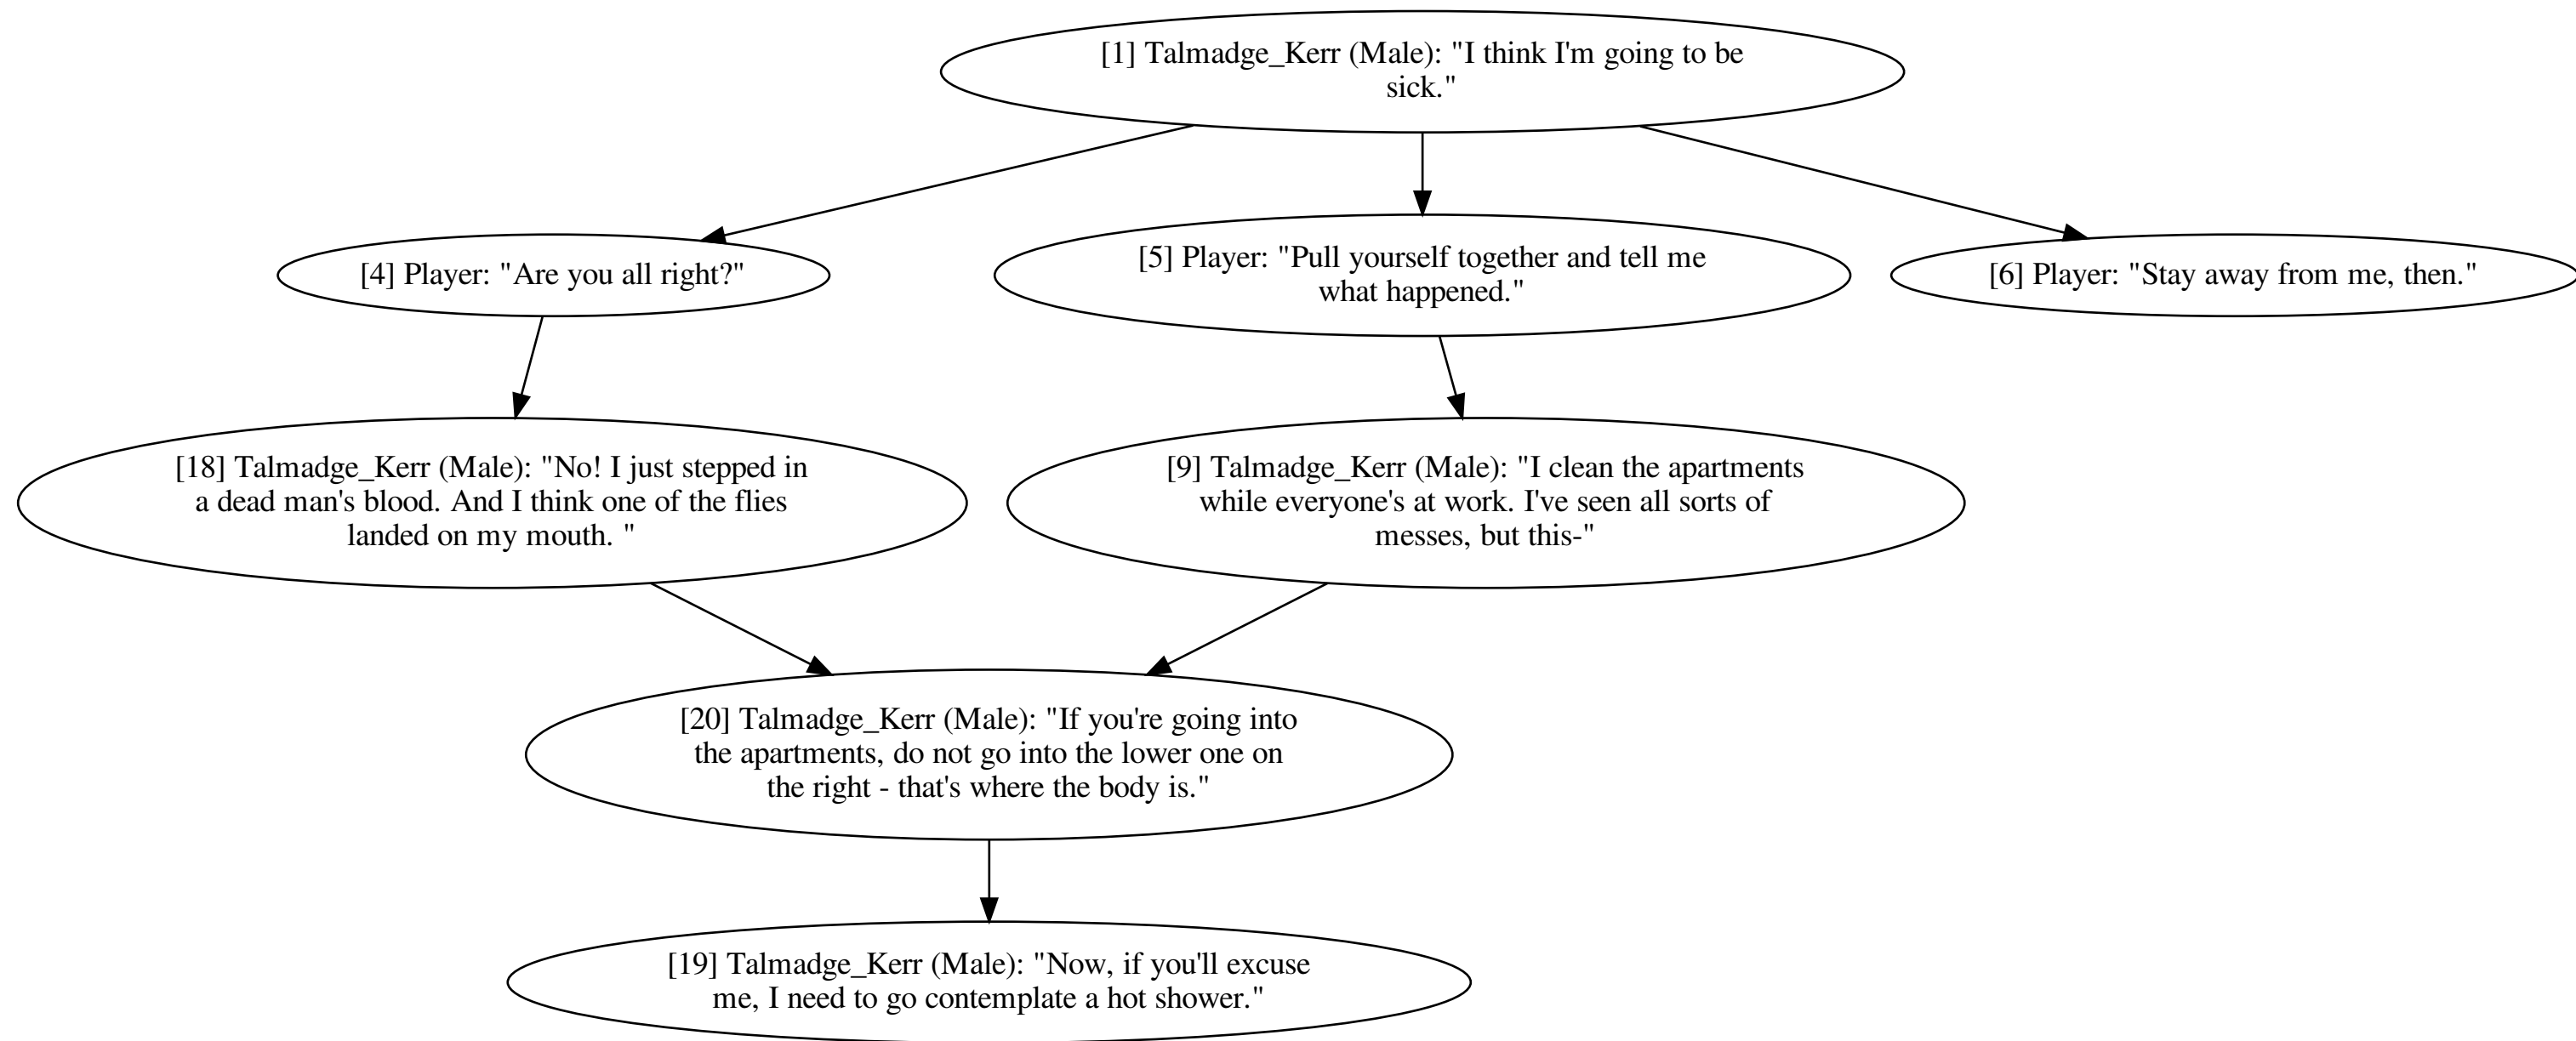

Supplement: software [file 2024.emnlp-main.520.software.zip]

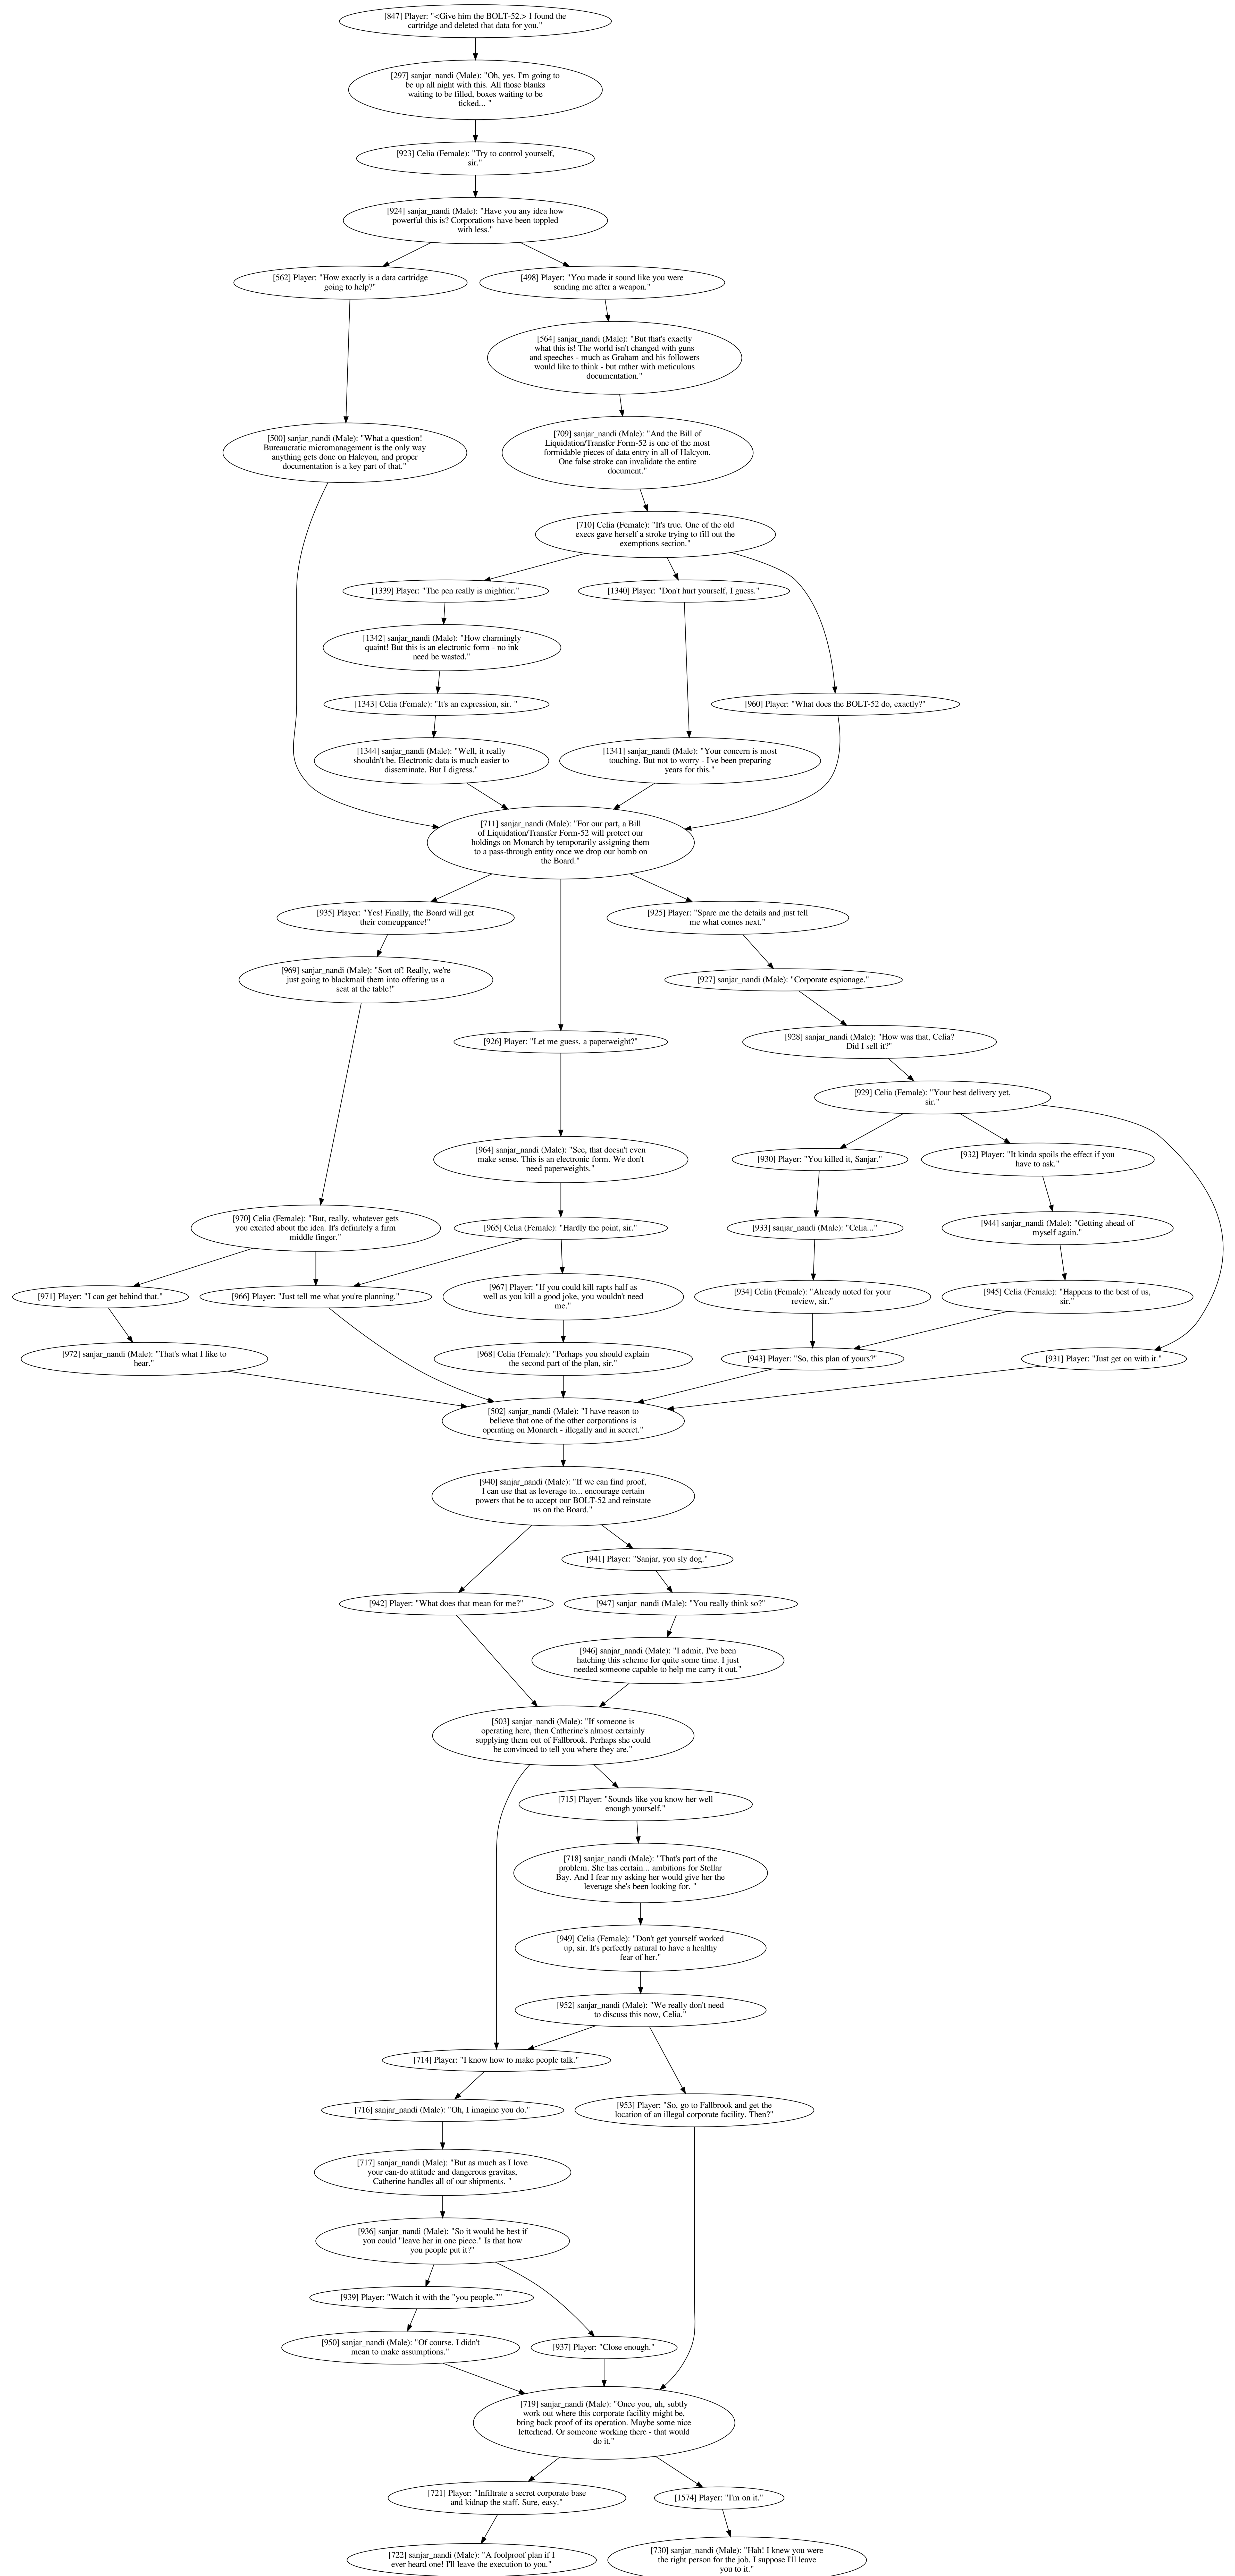

Supplement: software [file 2024.emnlp-main.520.software.zip]

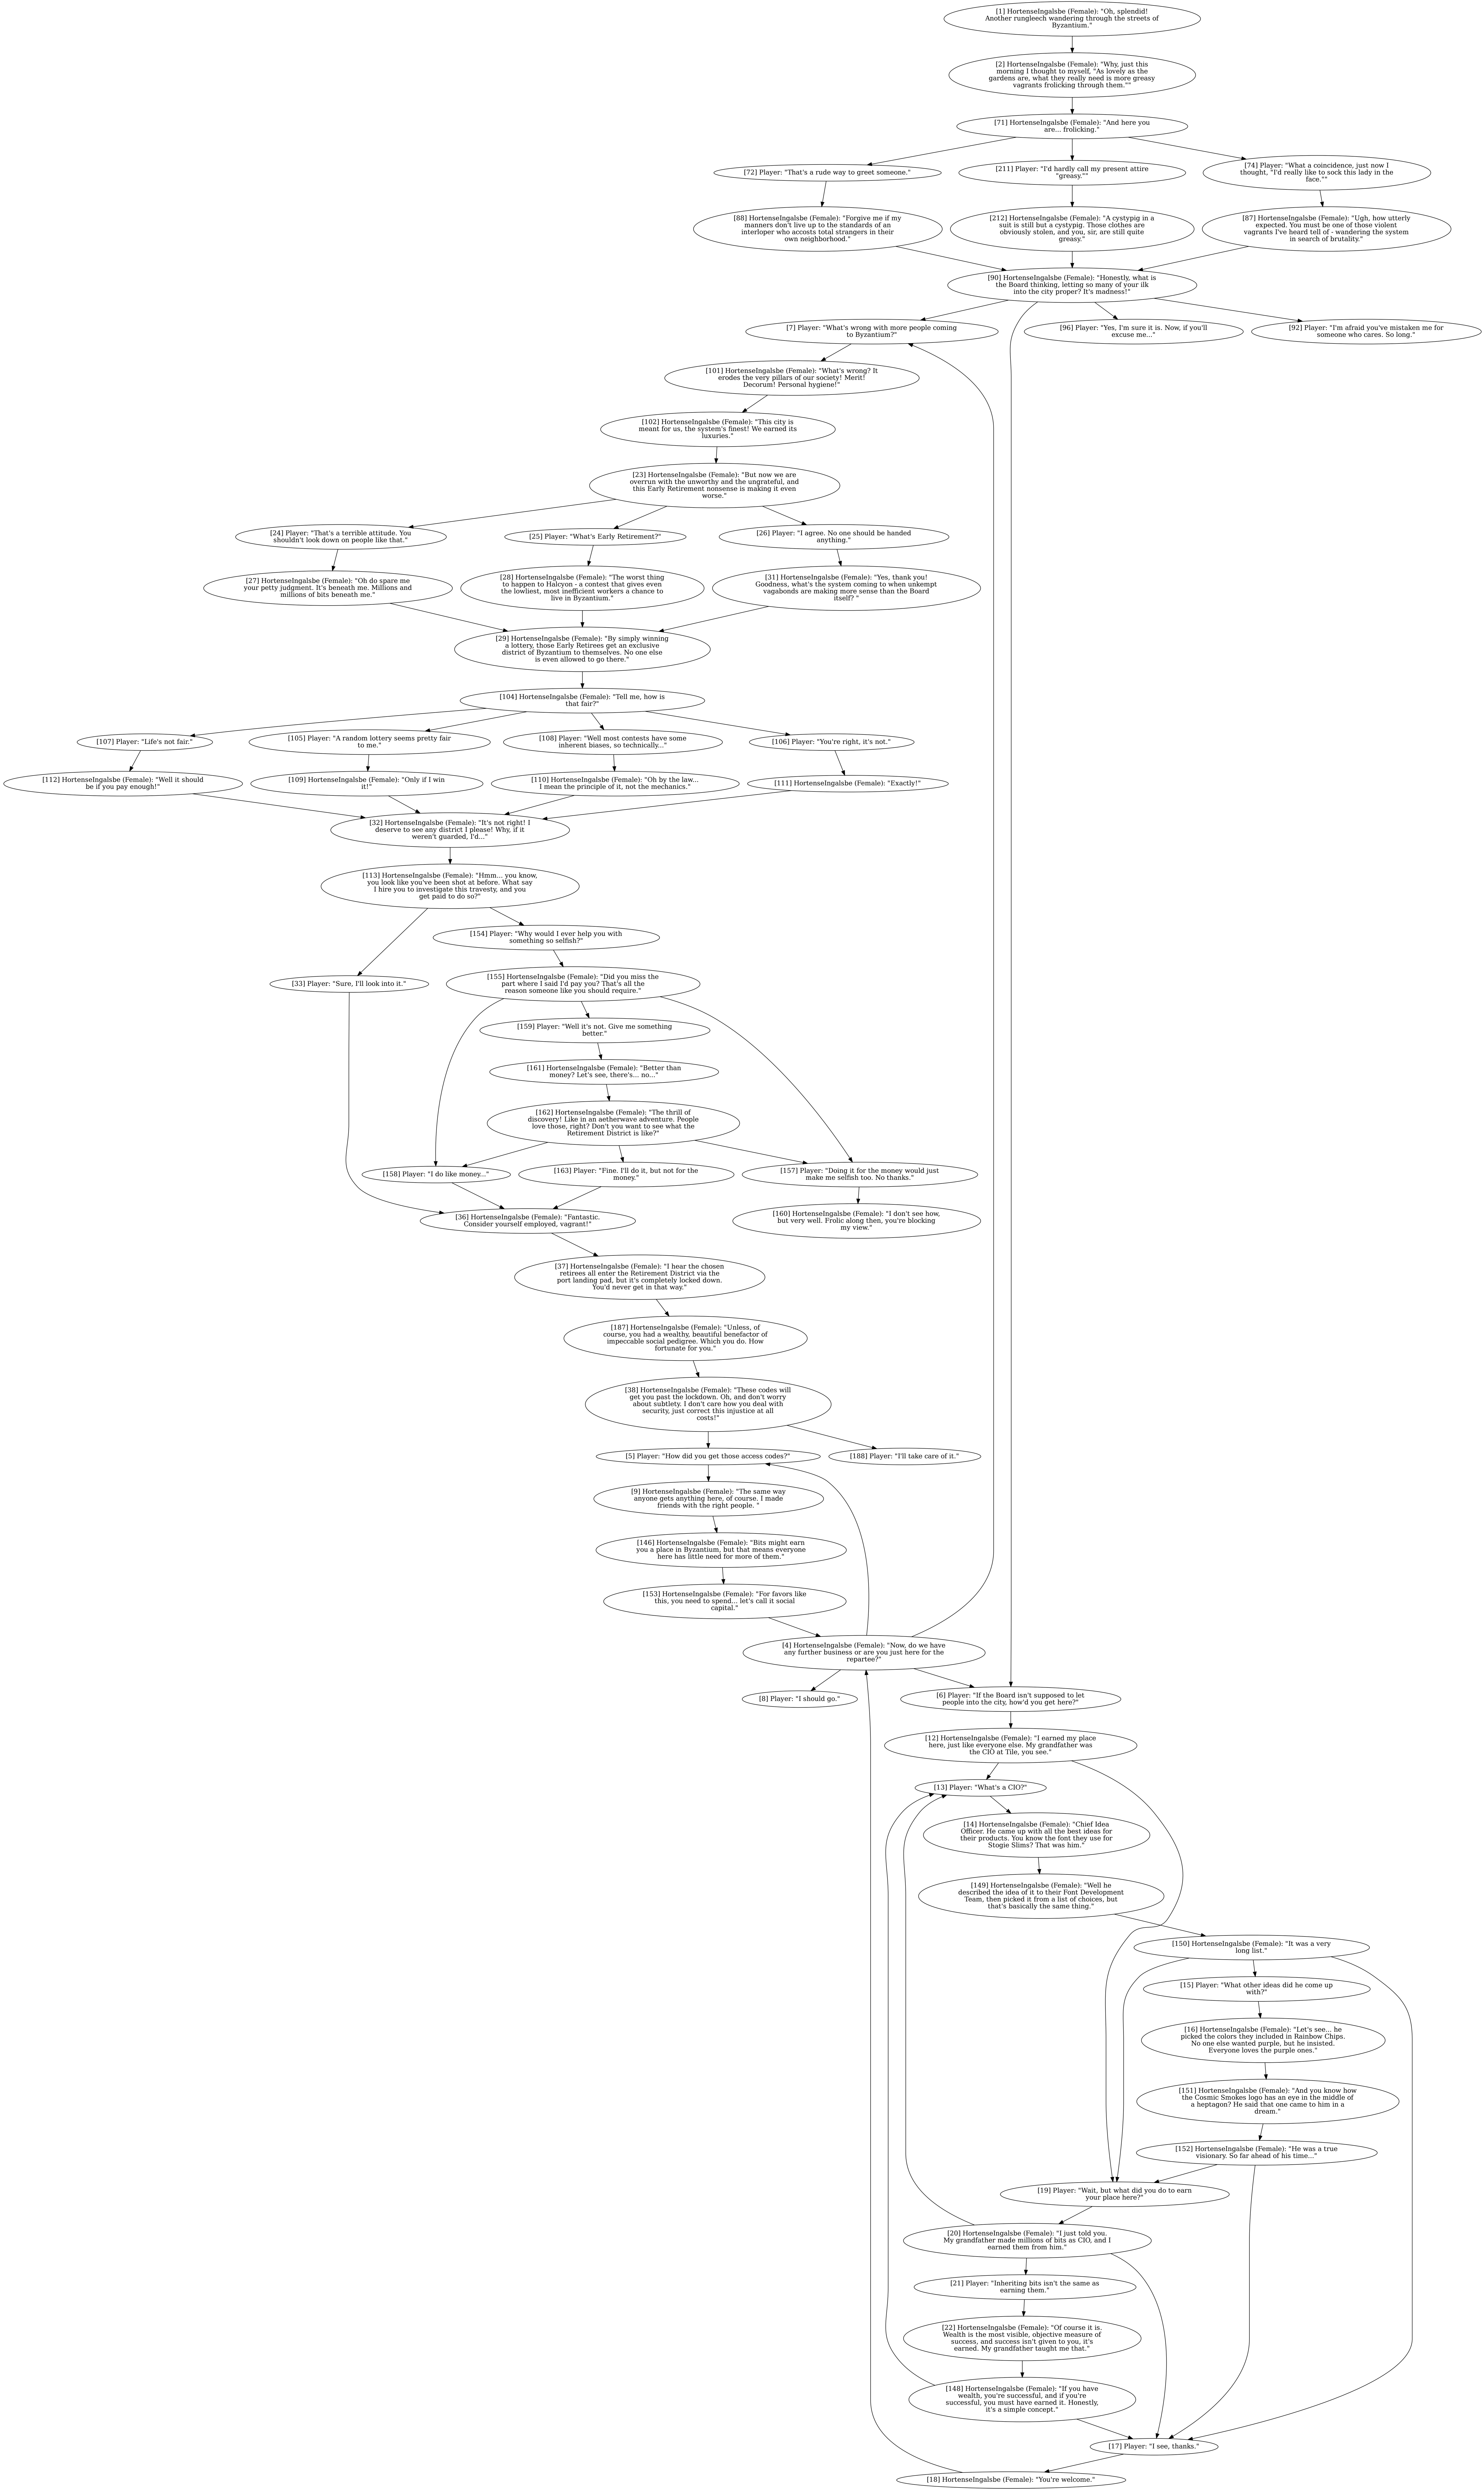

Supplement: software [file 2024.emnlp-main.520.software.zip]

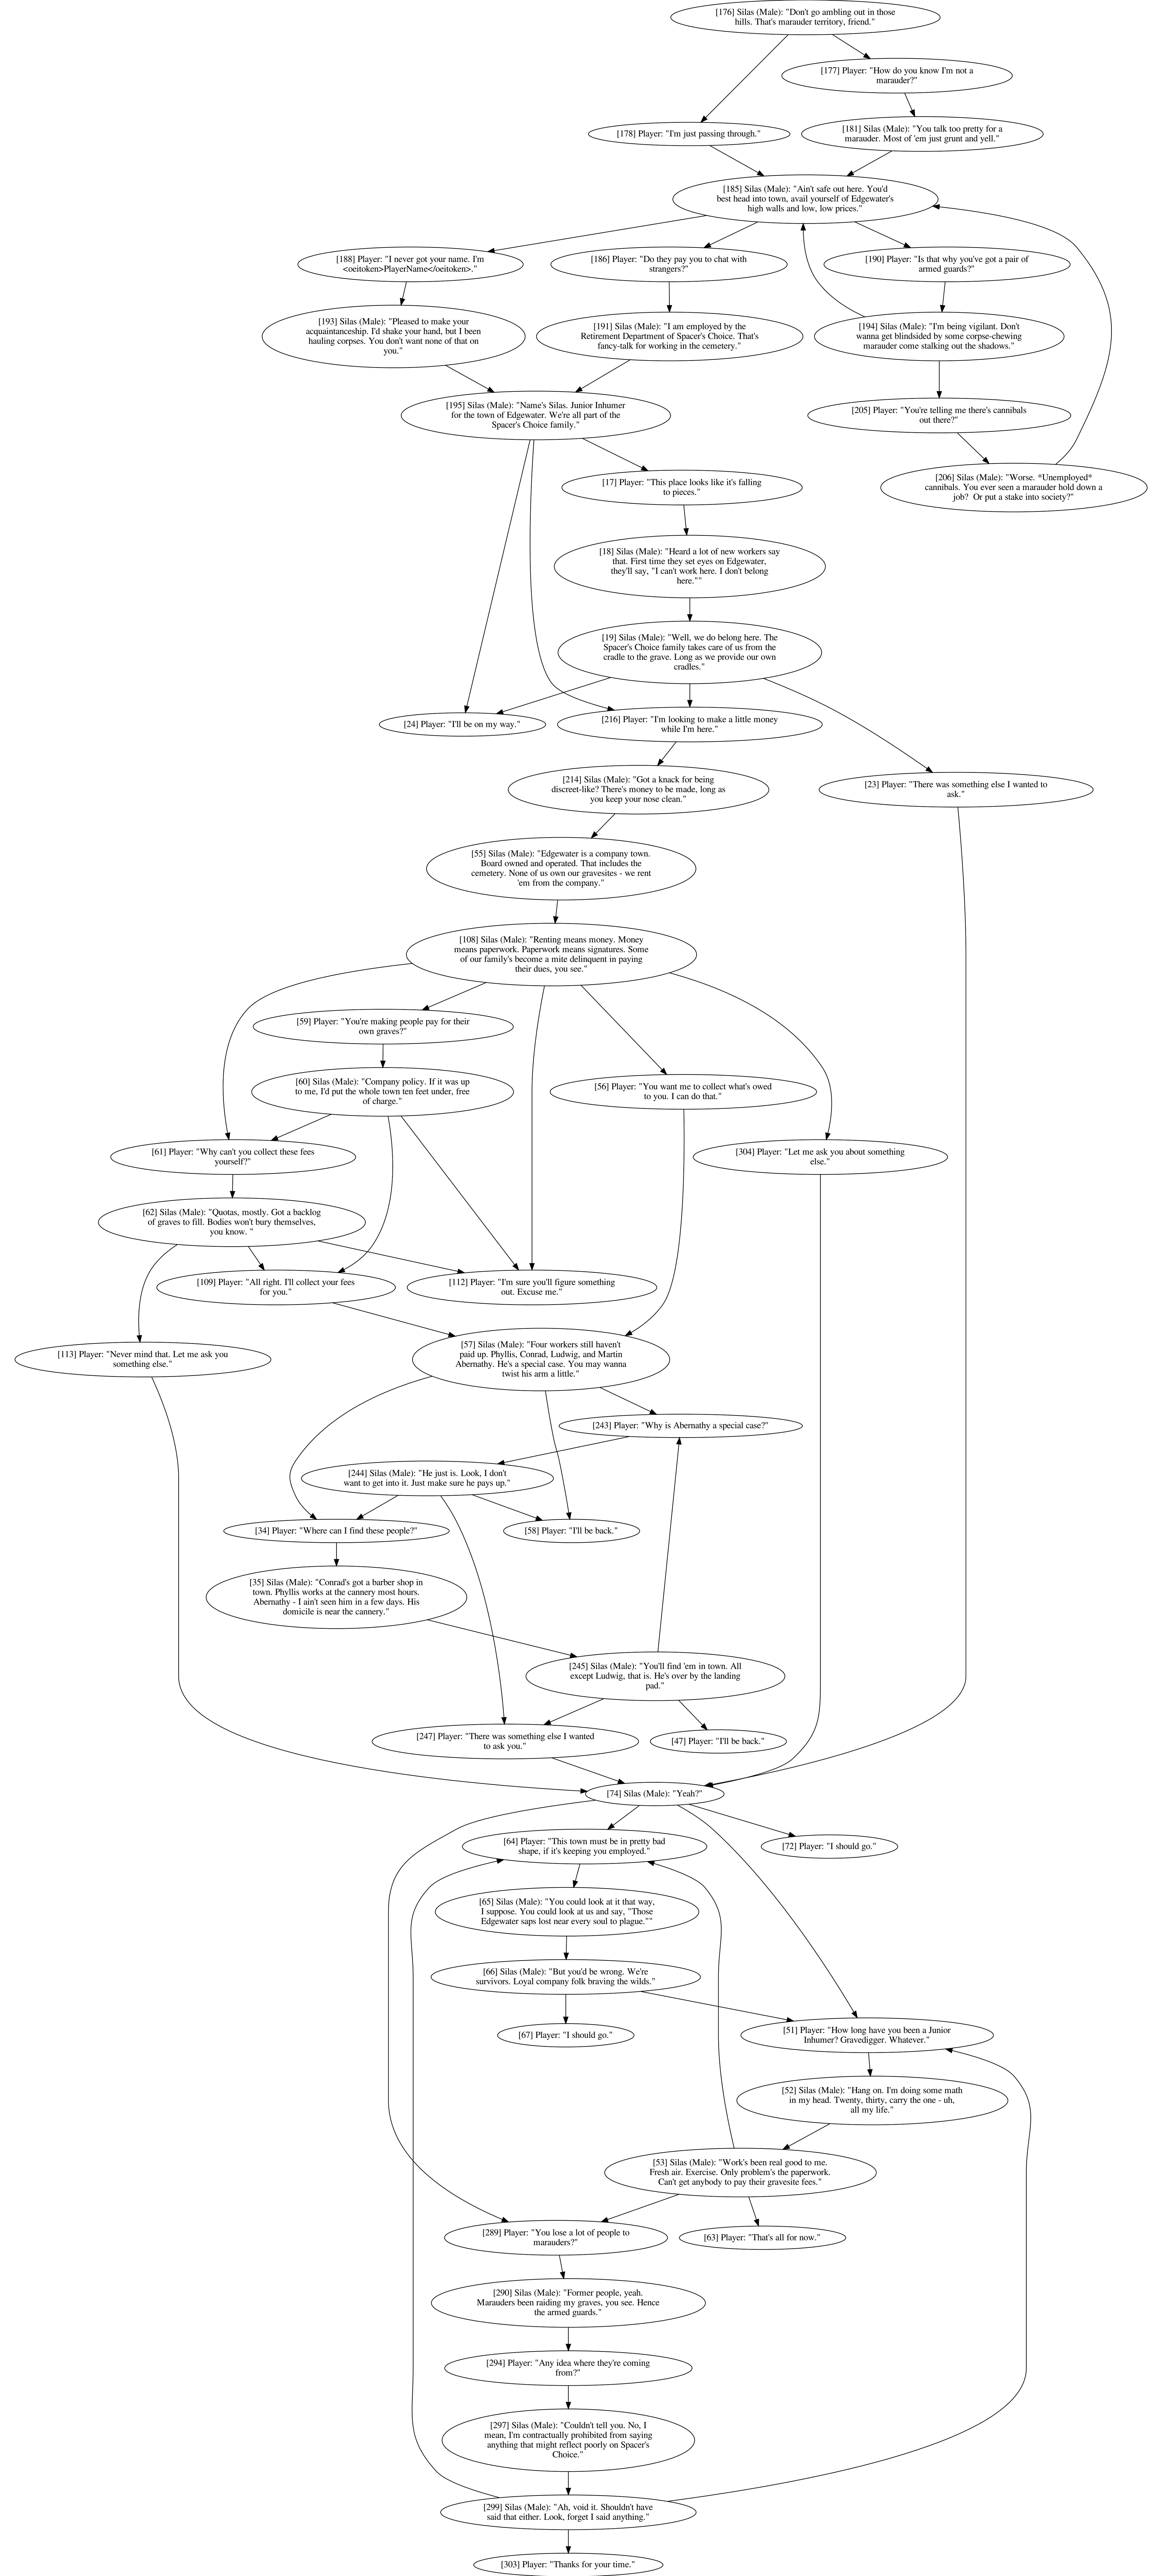

Supplement: software [file 2024.emnlp-main.520.software.zip]

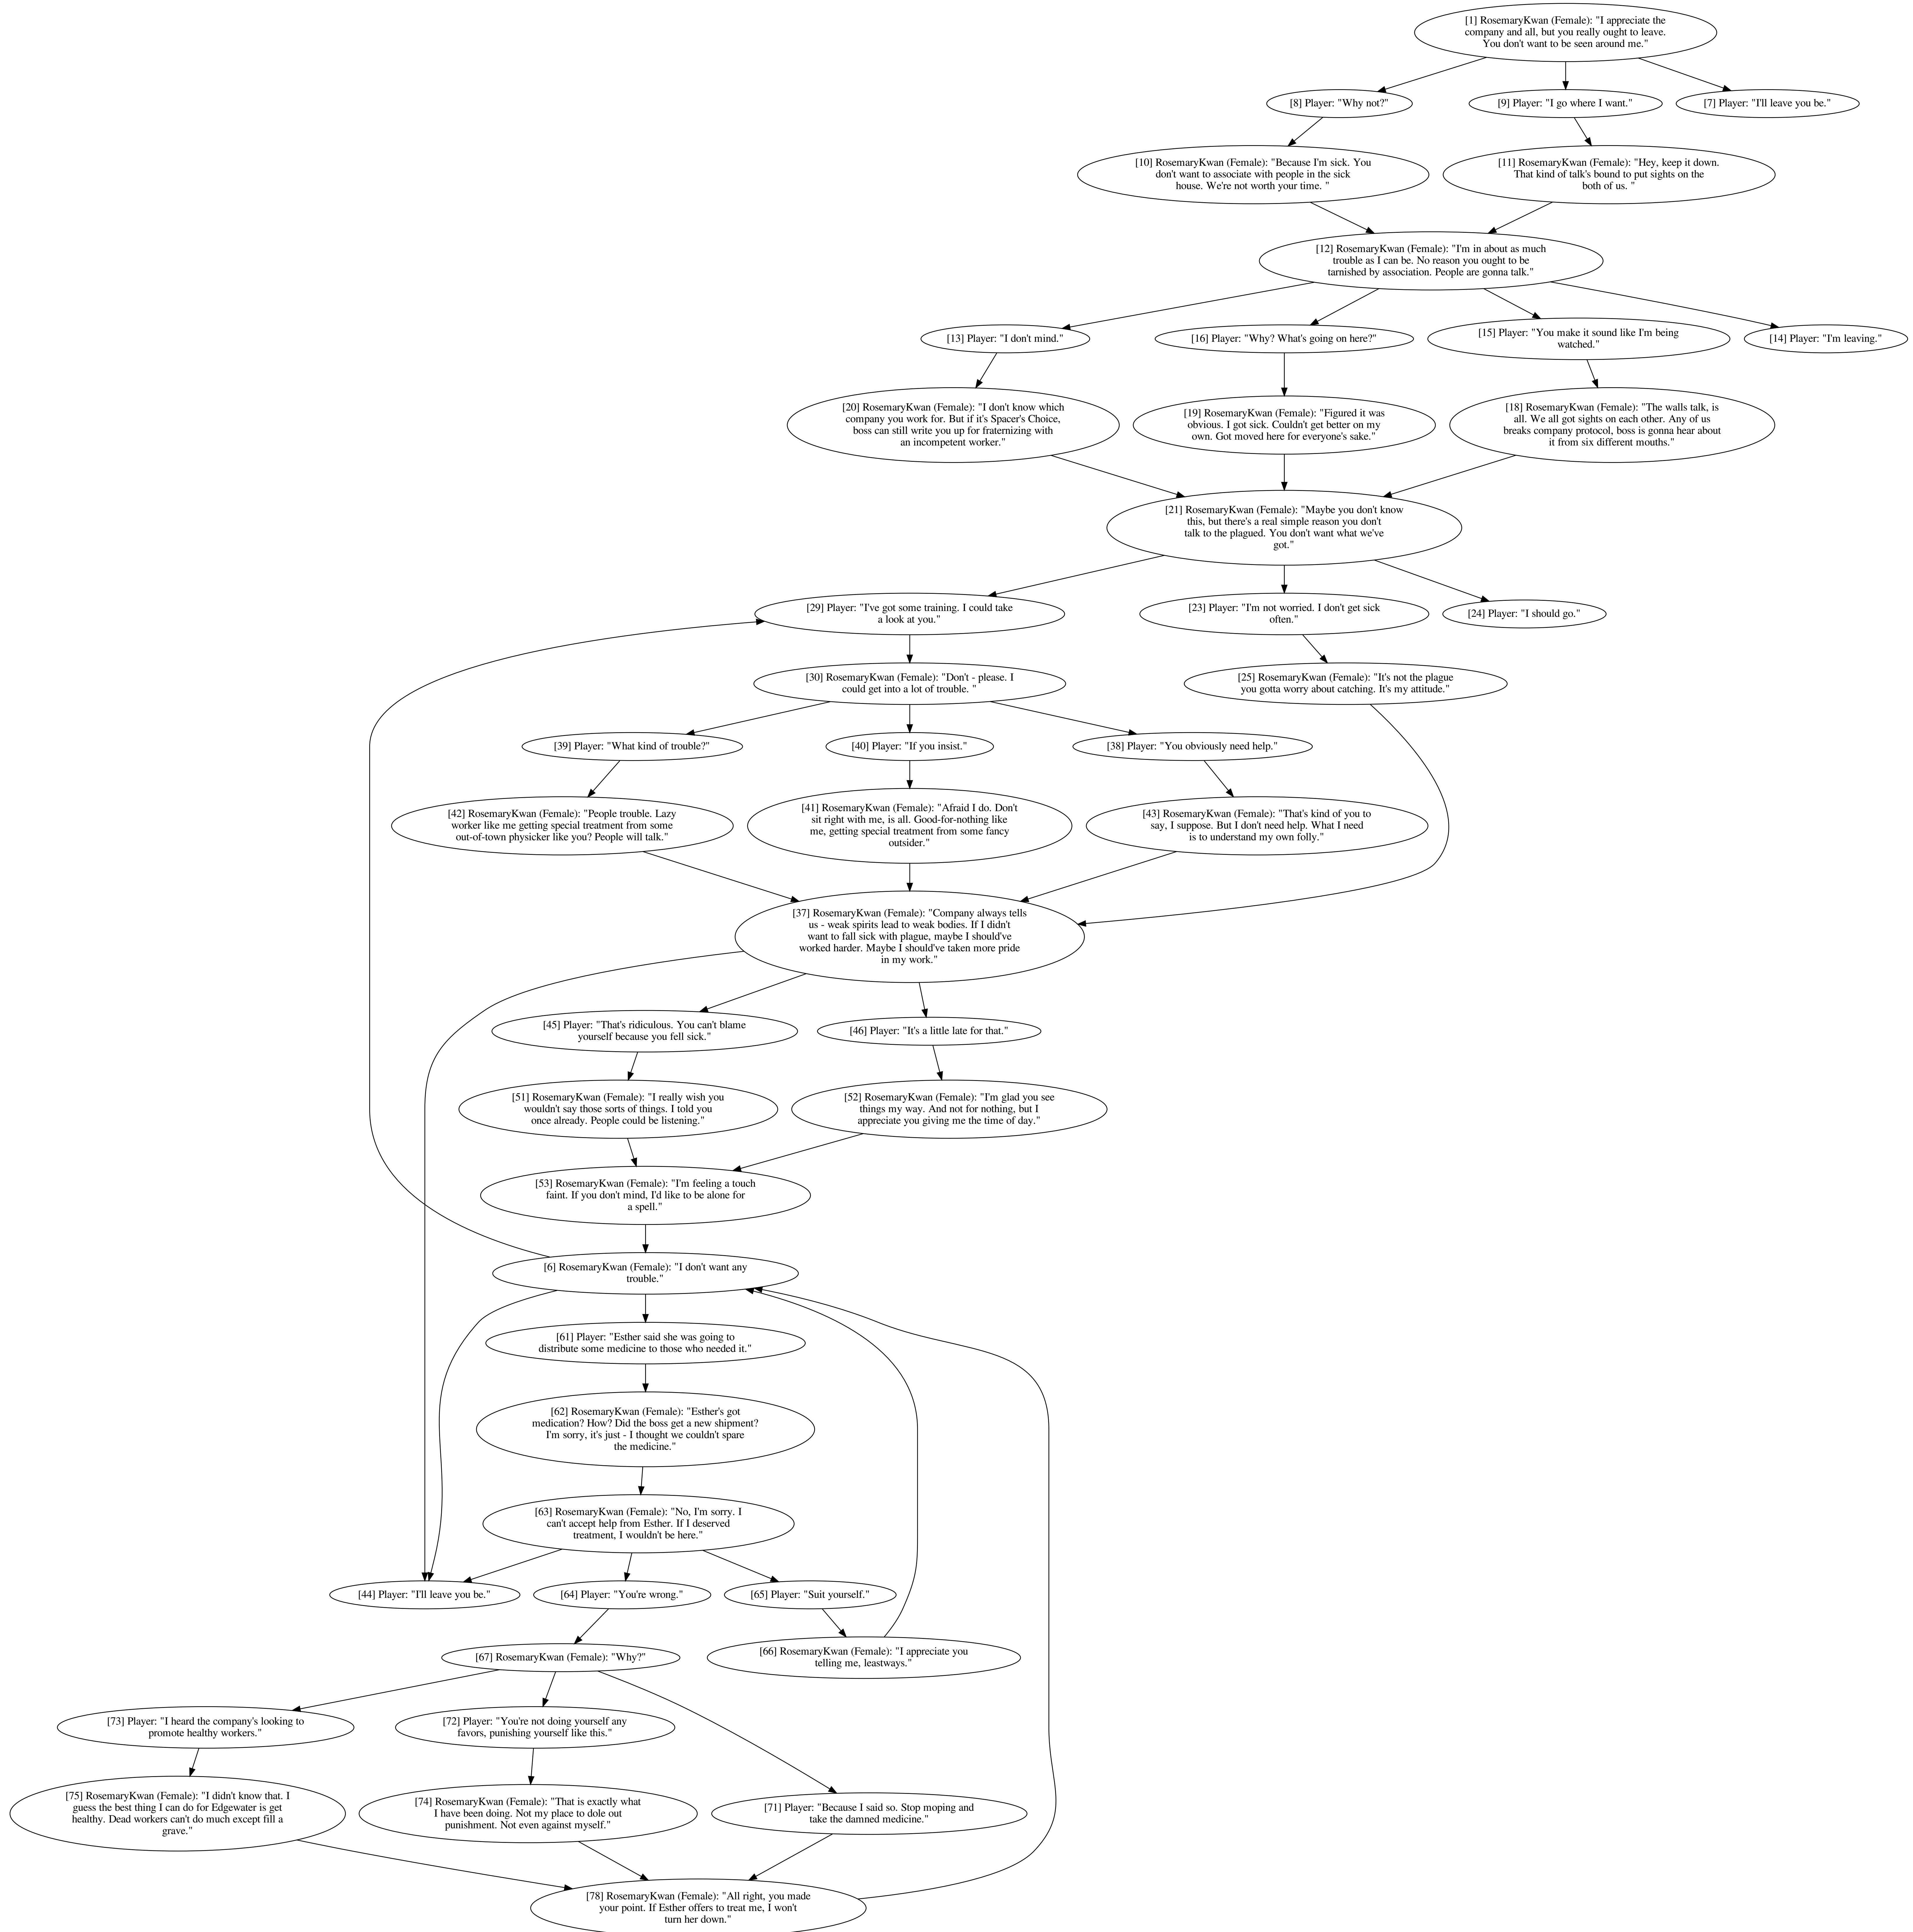

Supplement: software [file 2024.emnlp-main.520.software.zip]

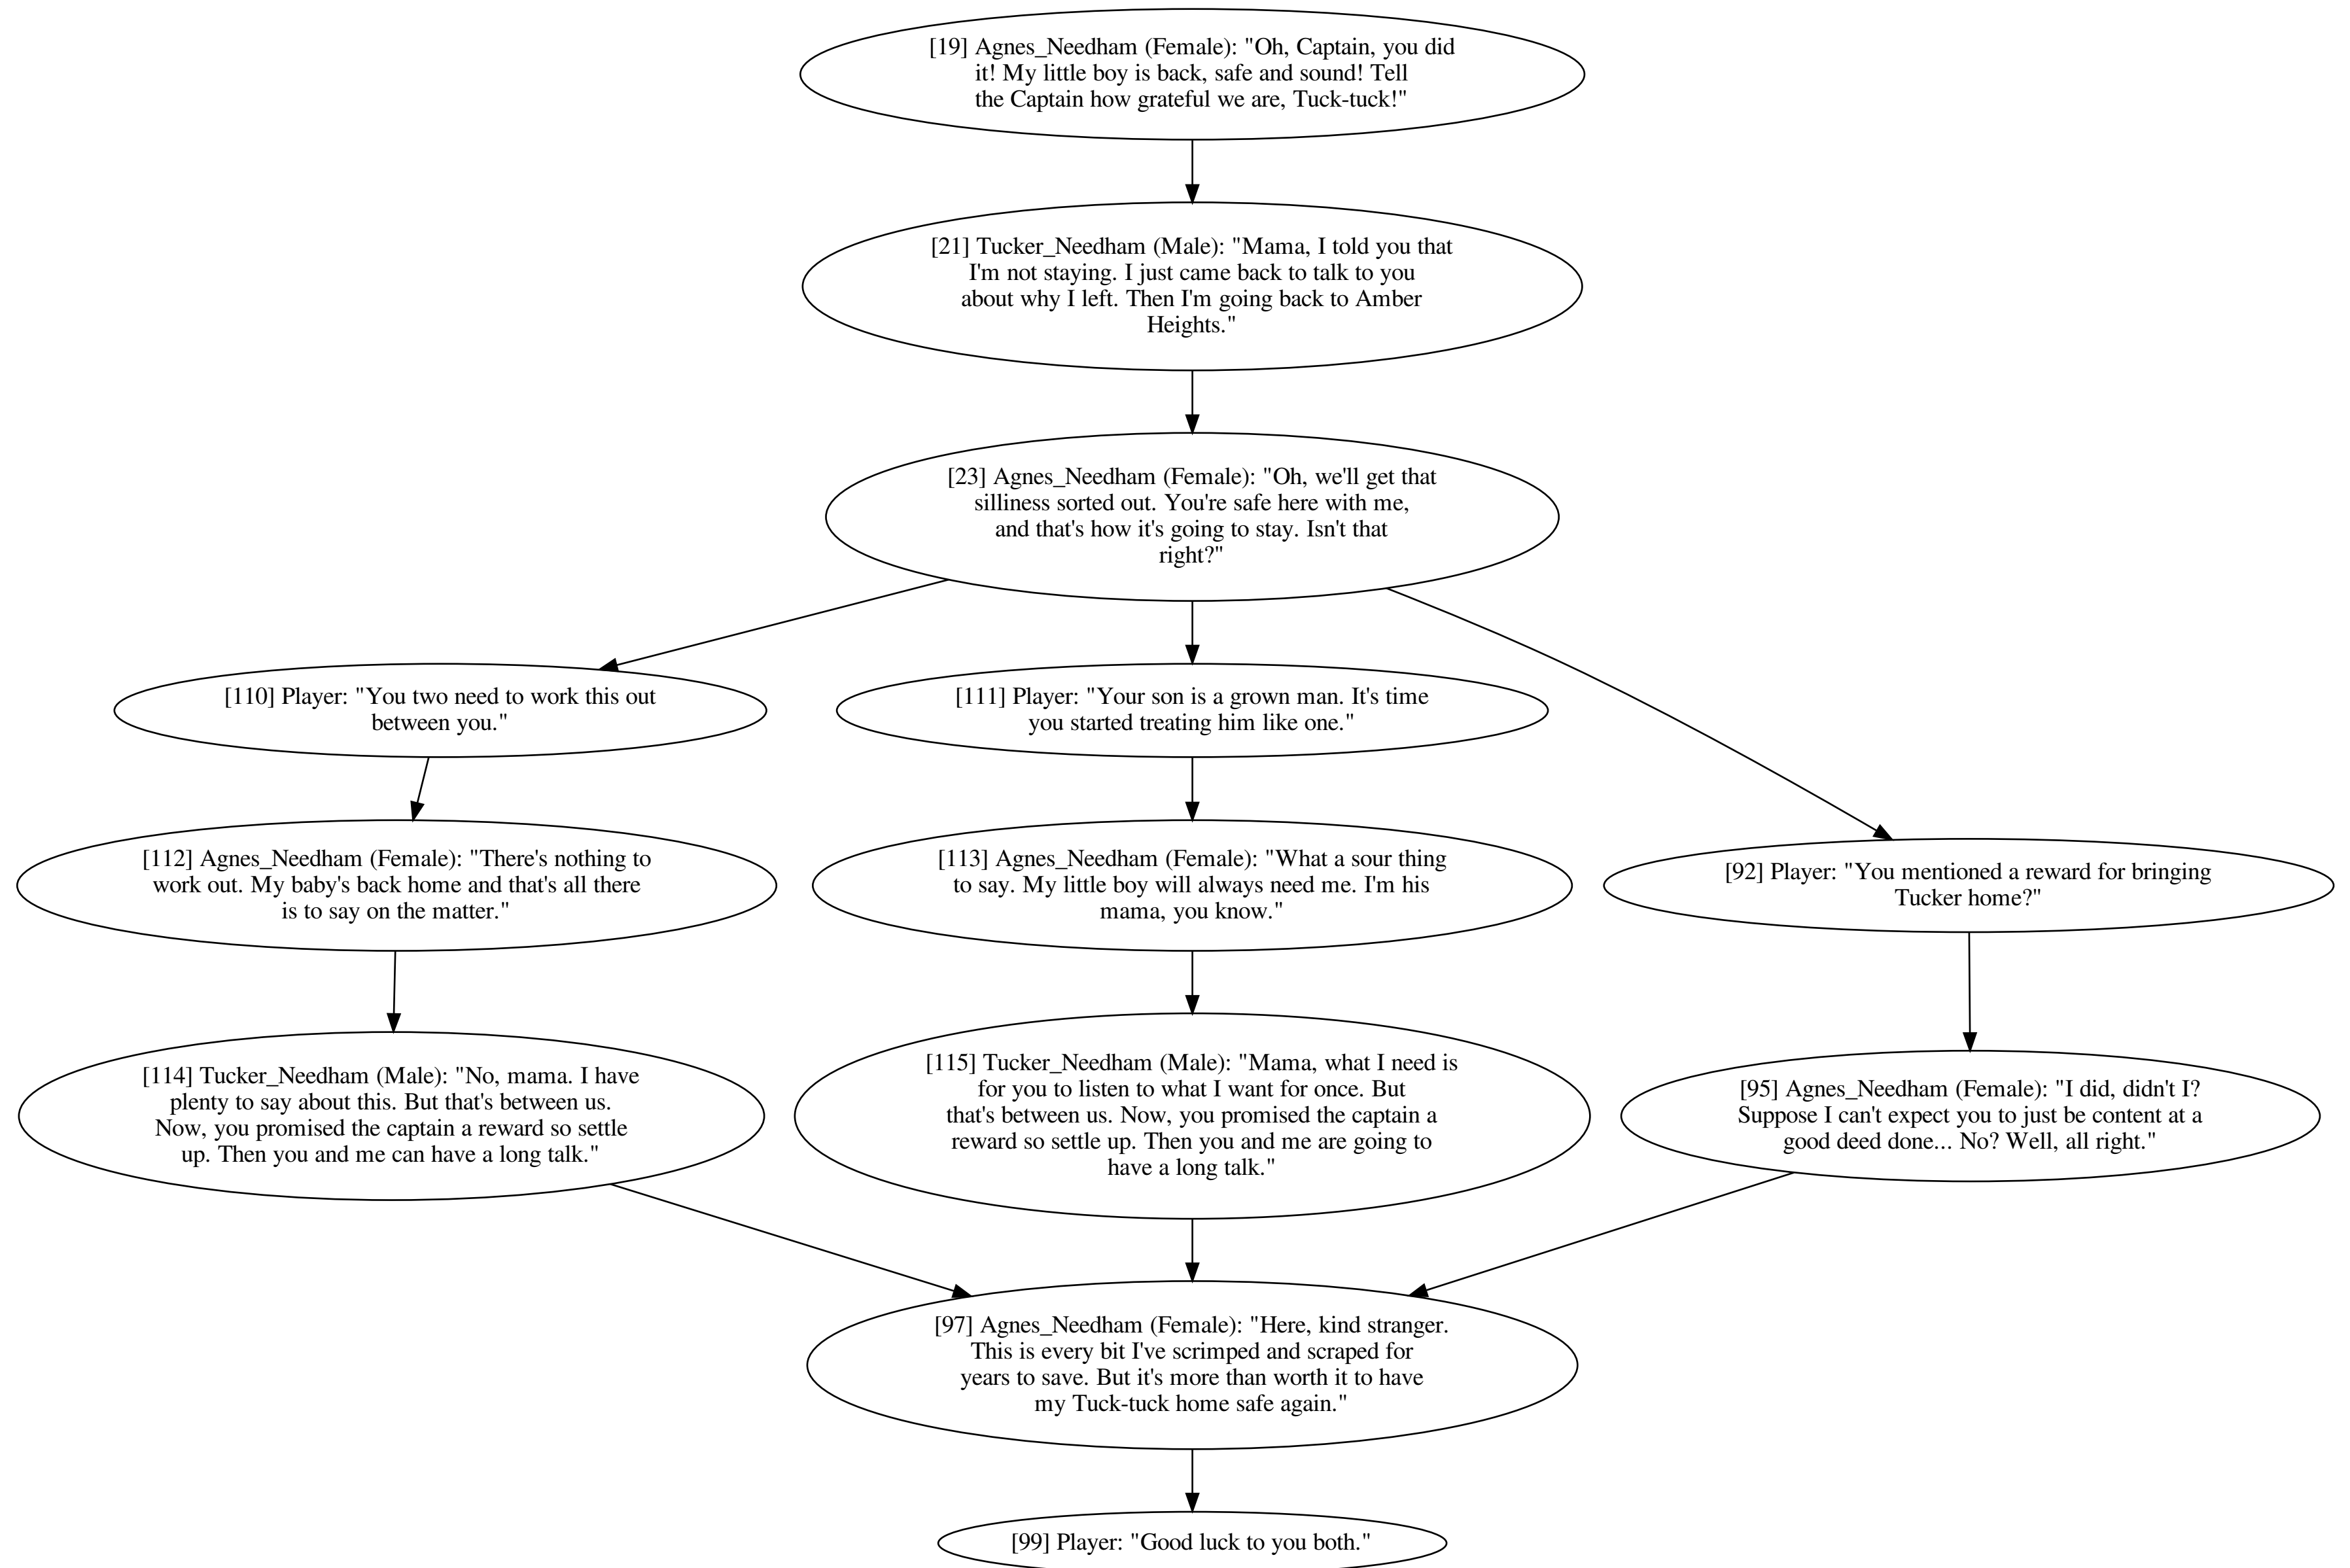

Supplement: software [file 2024.emnlp-main.520.software.zip]

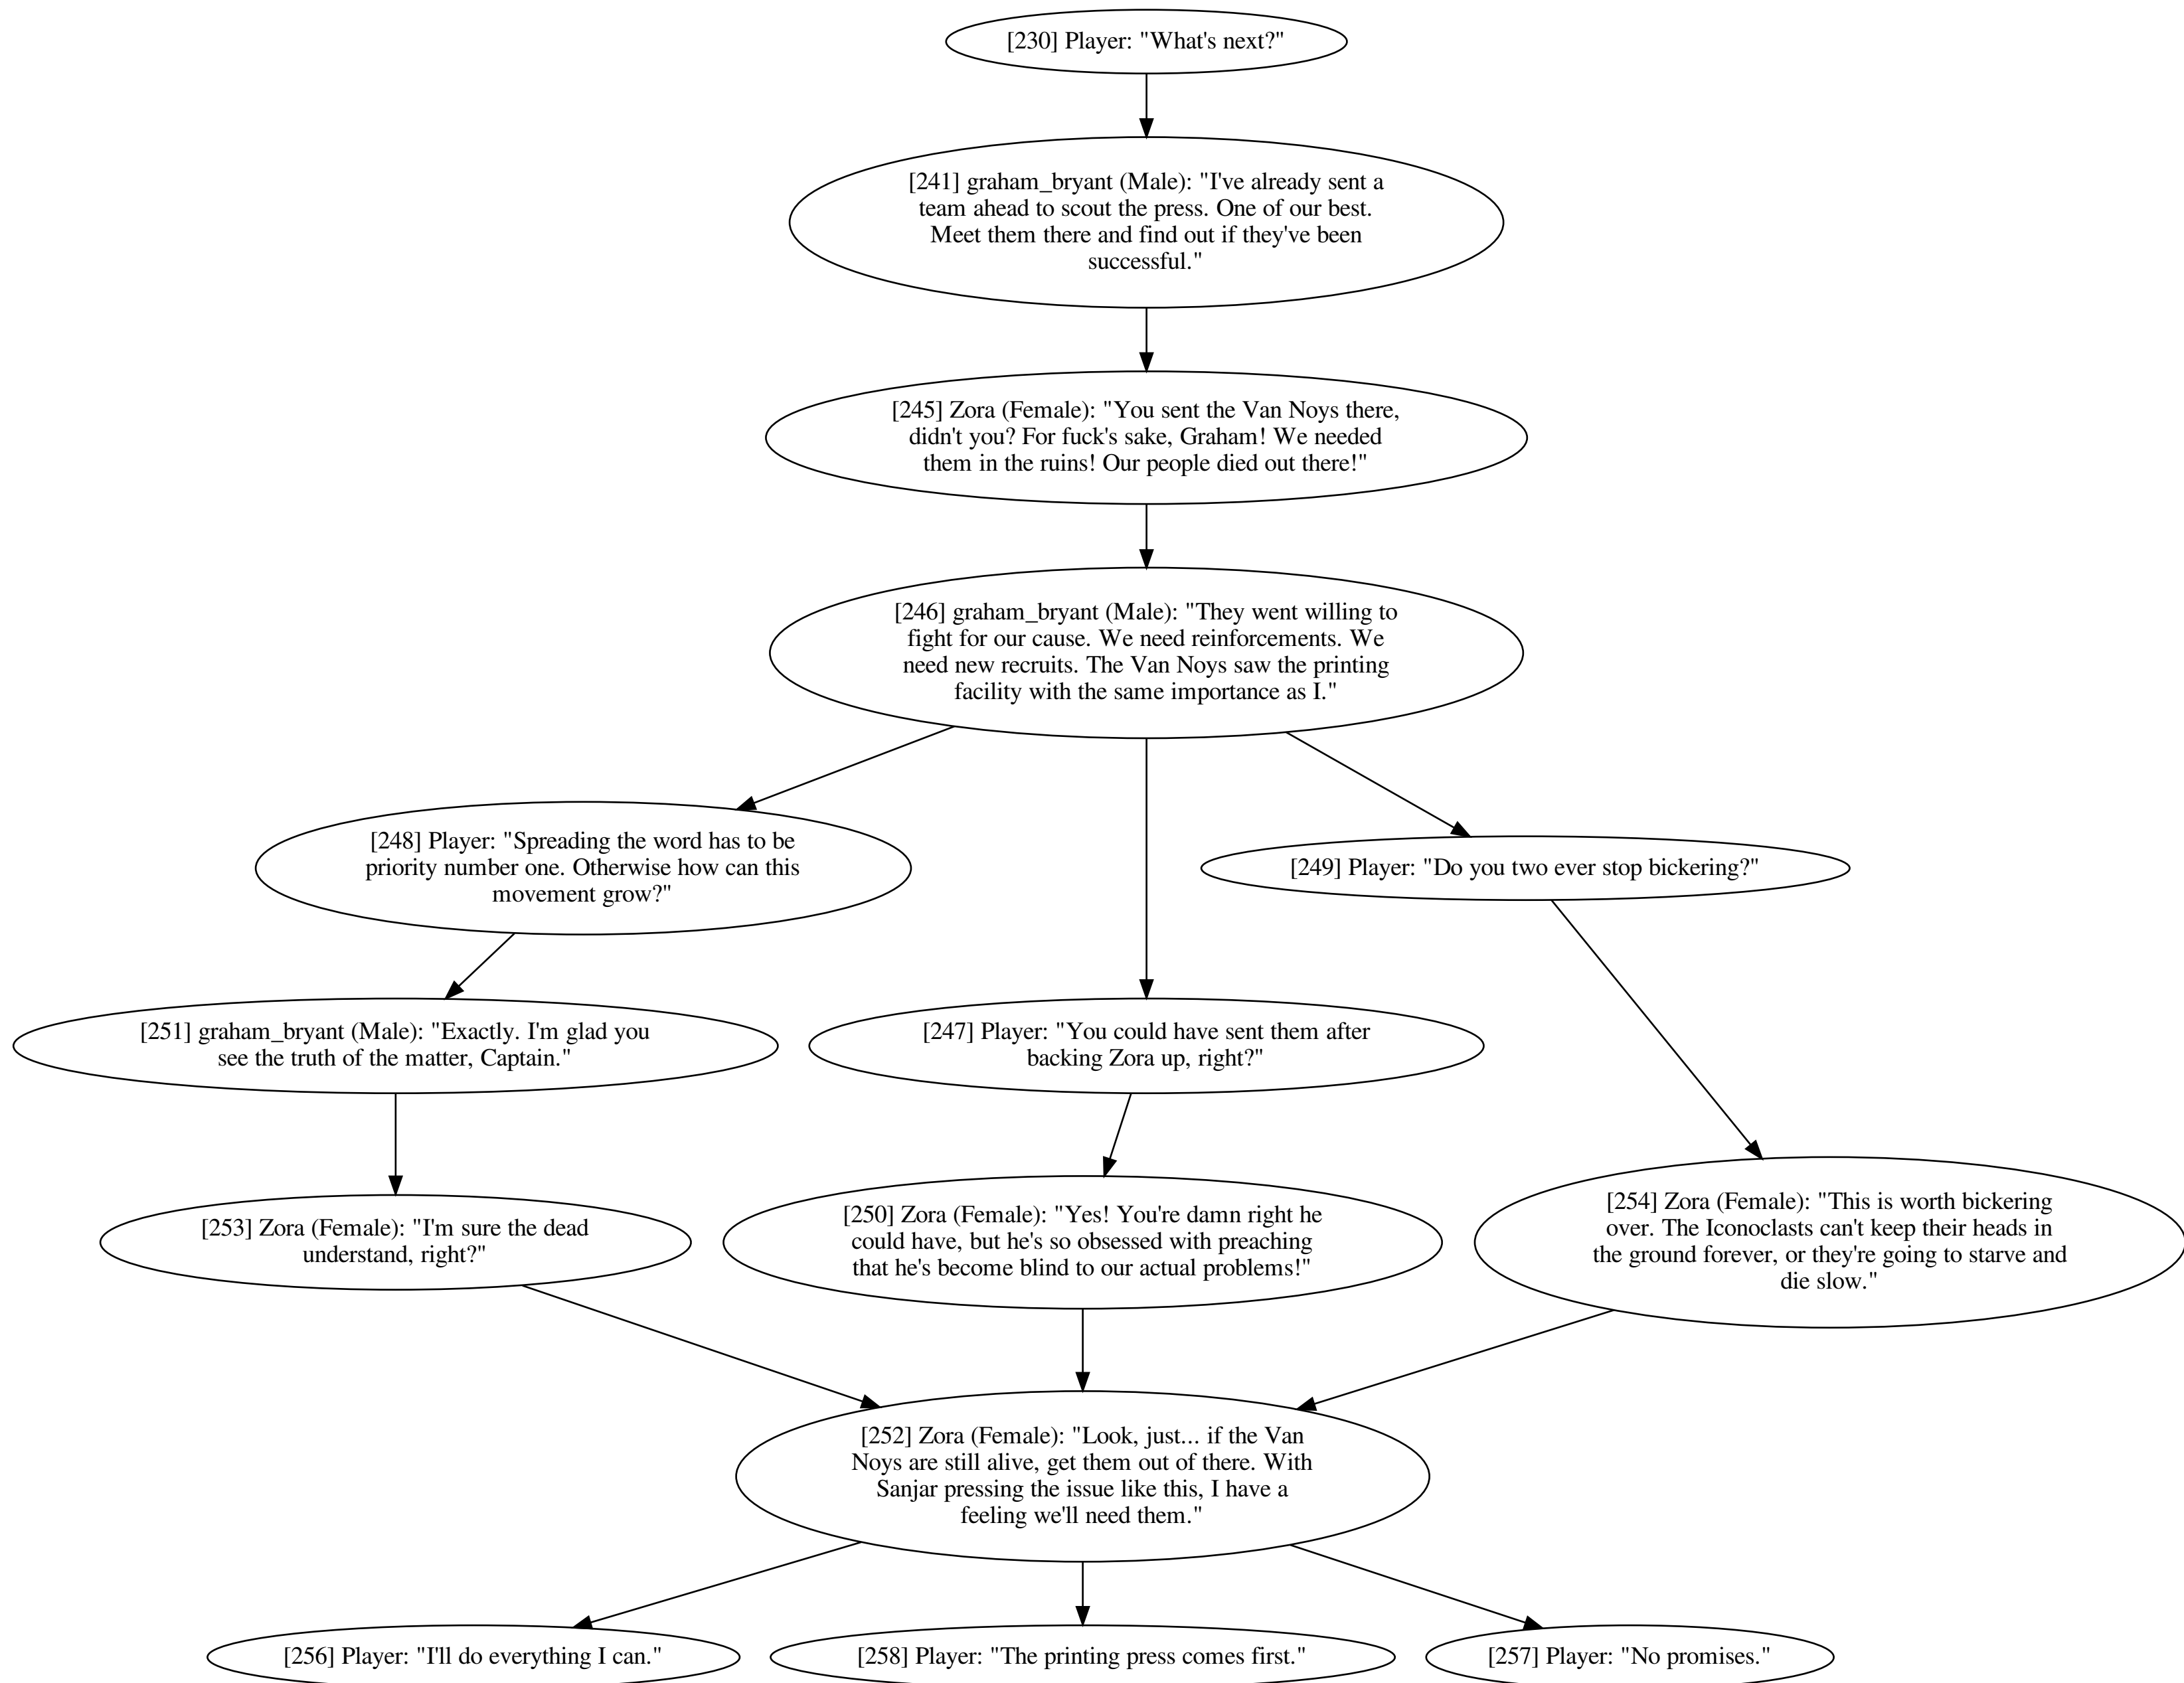

Supplement: software [file 2024.emnlp-main.520.software.zip]

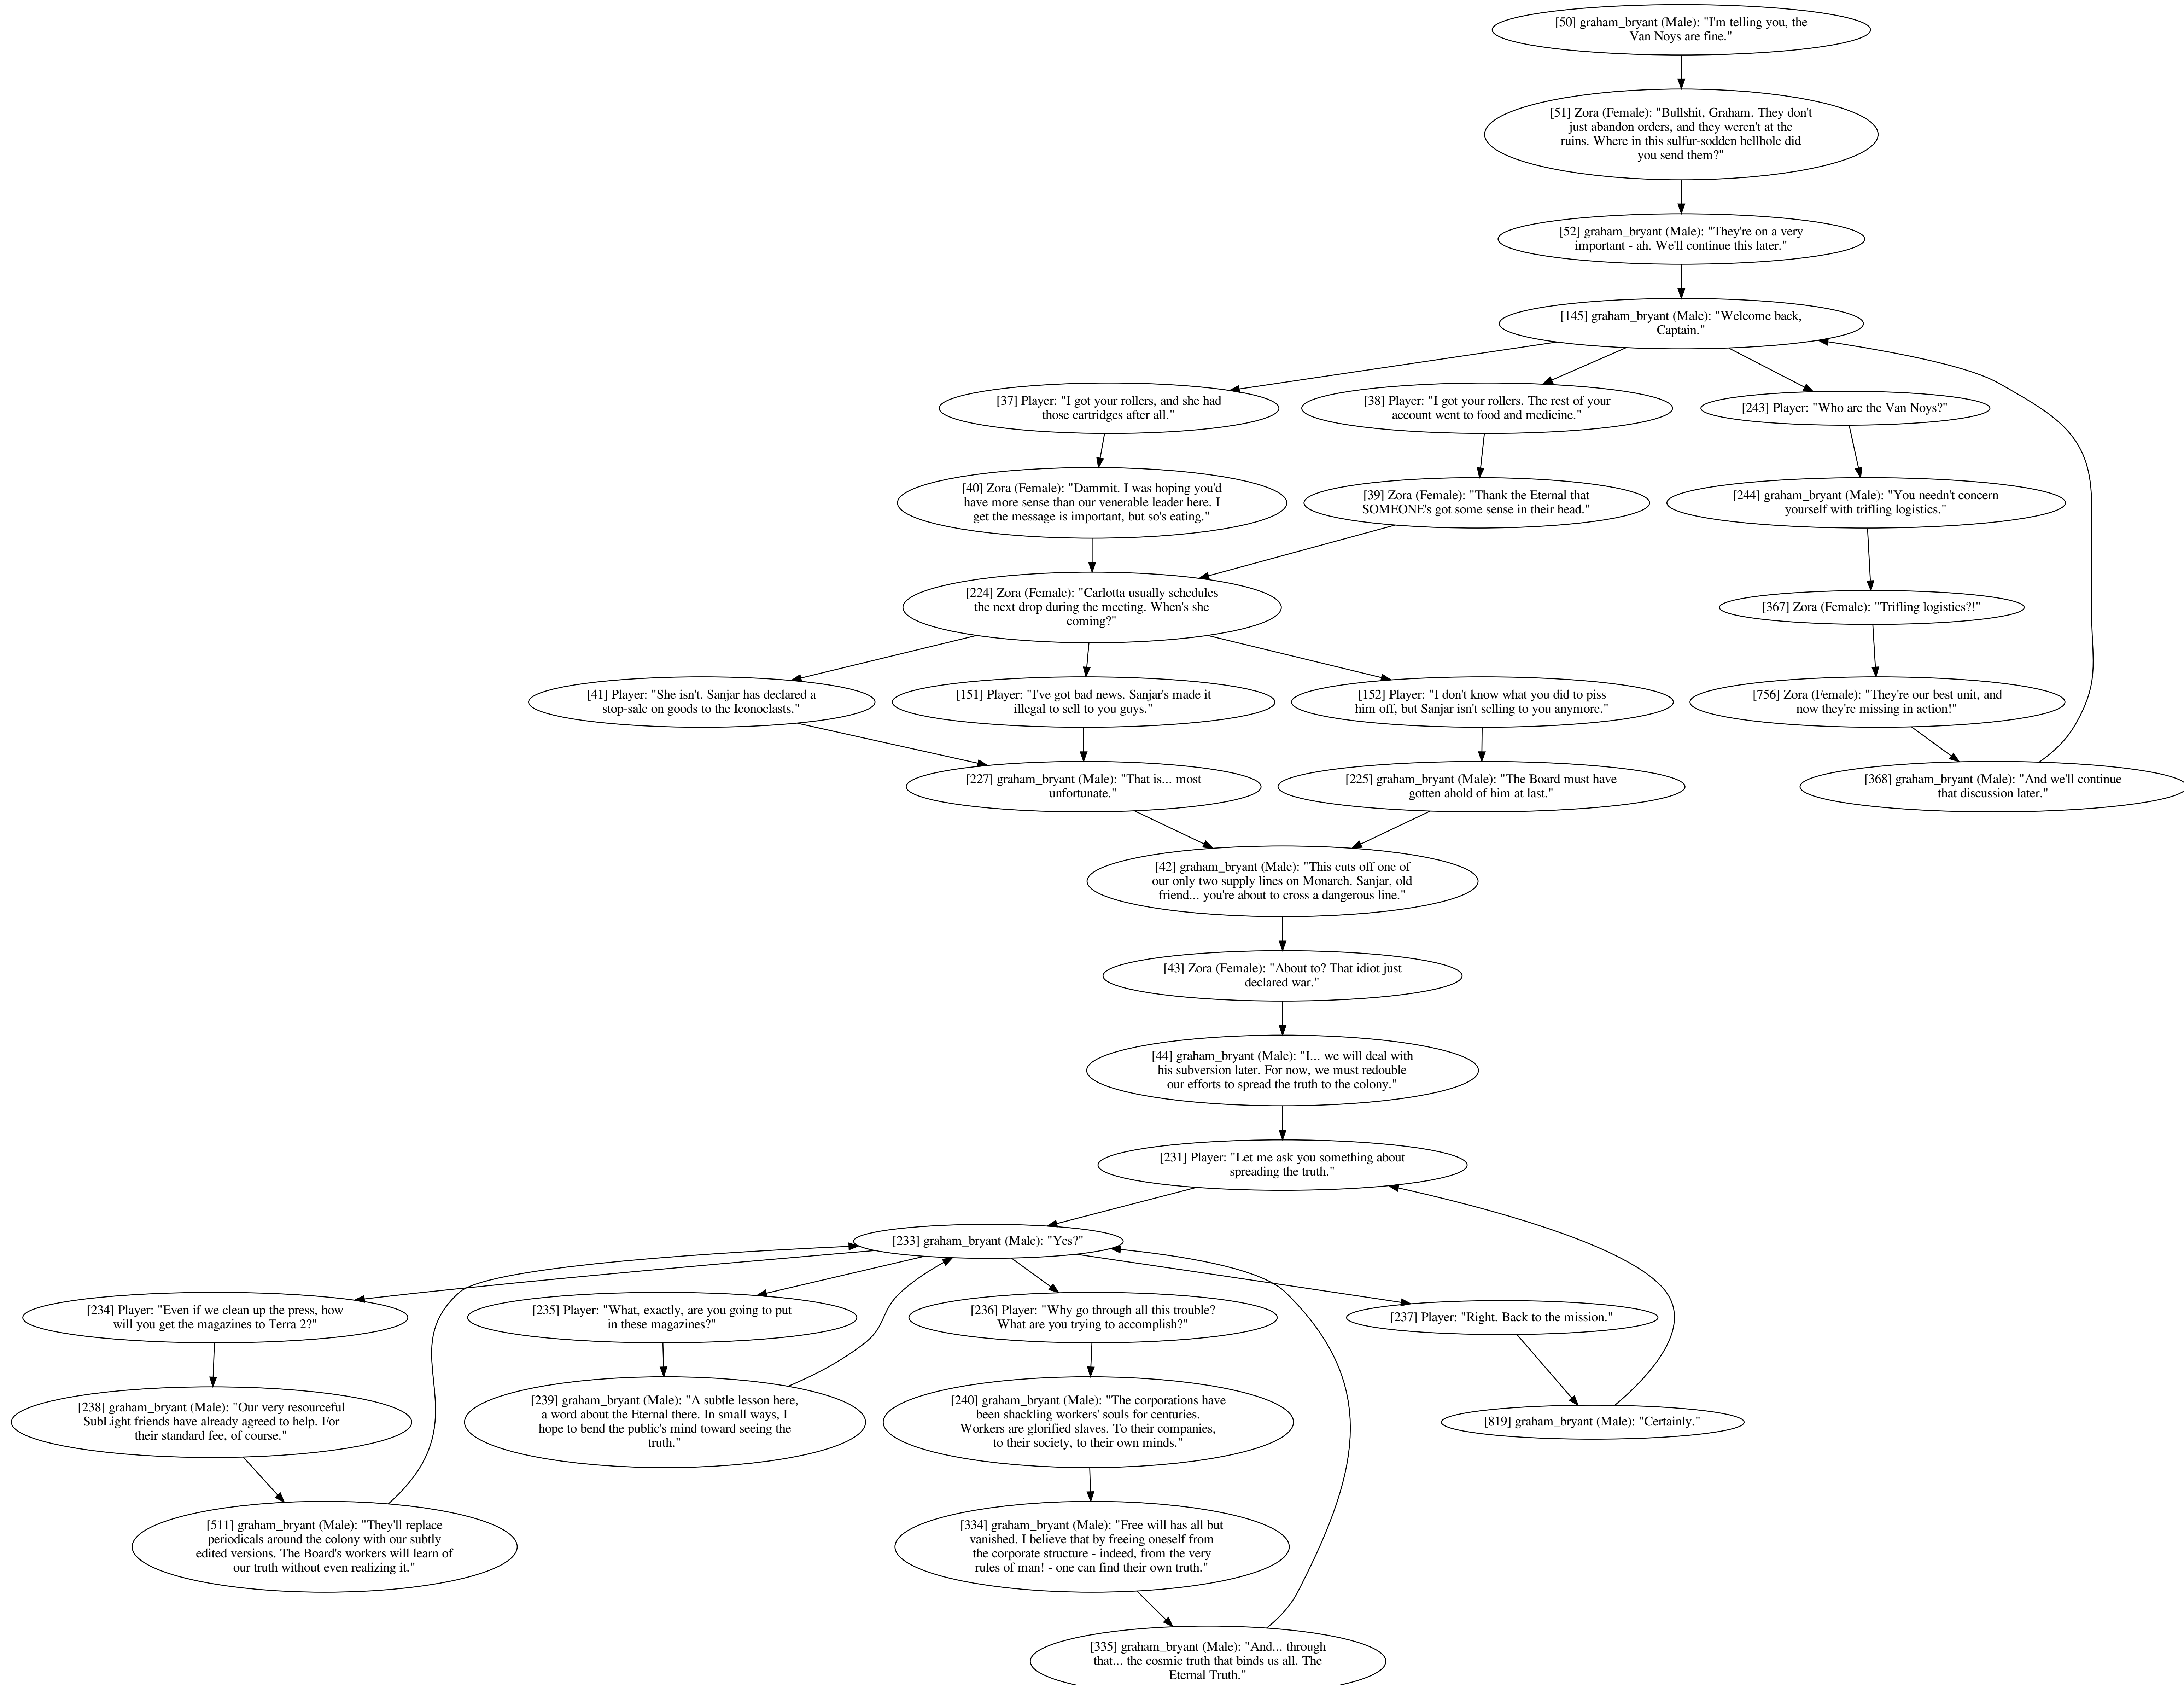

Supplement: software [file 2024.emnlp-main.520.software.zip]

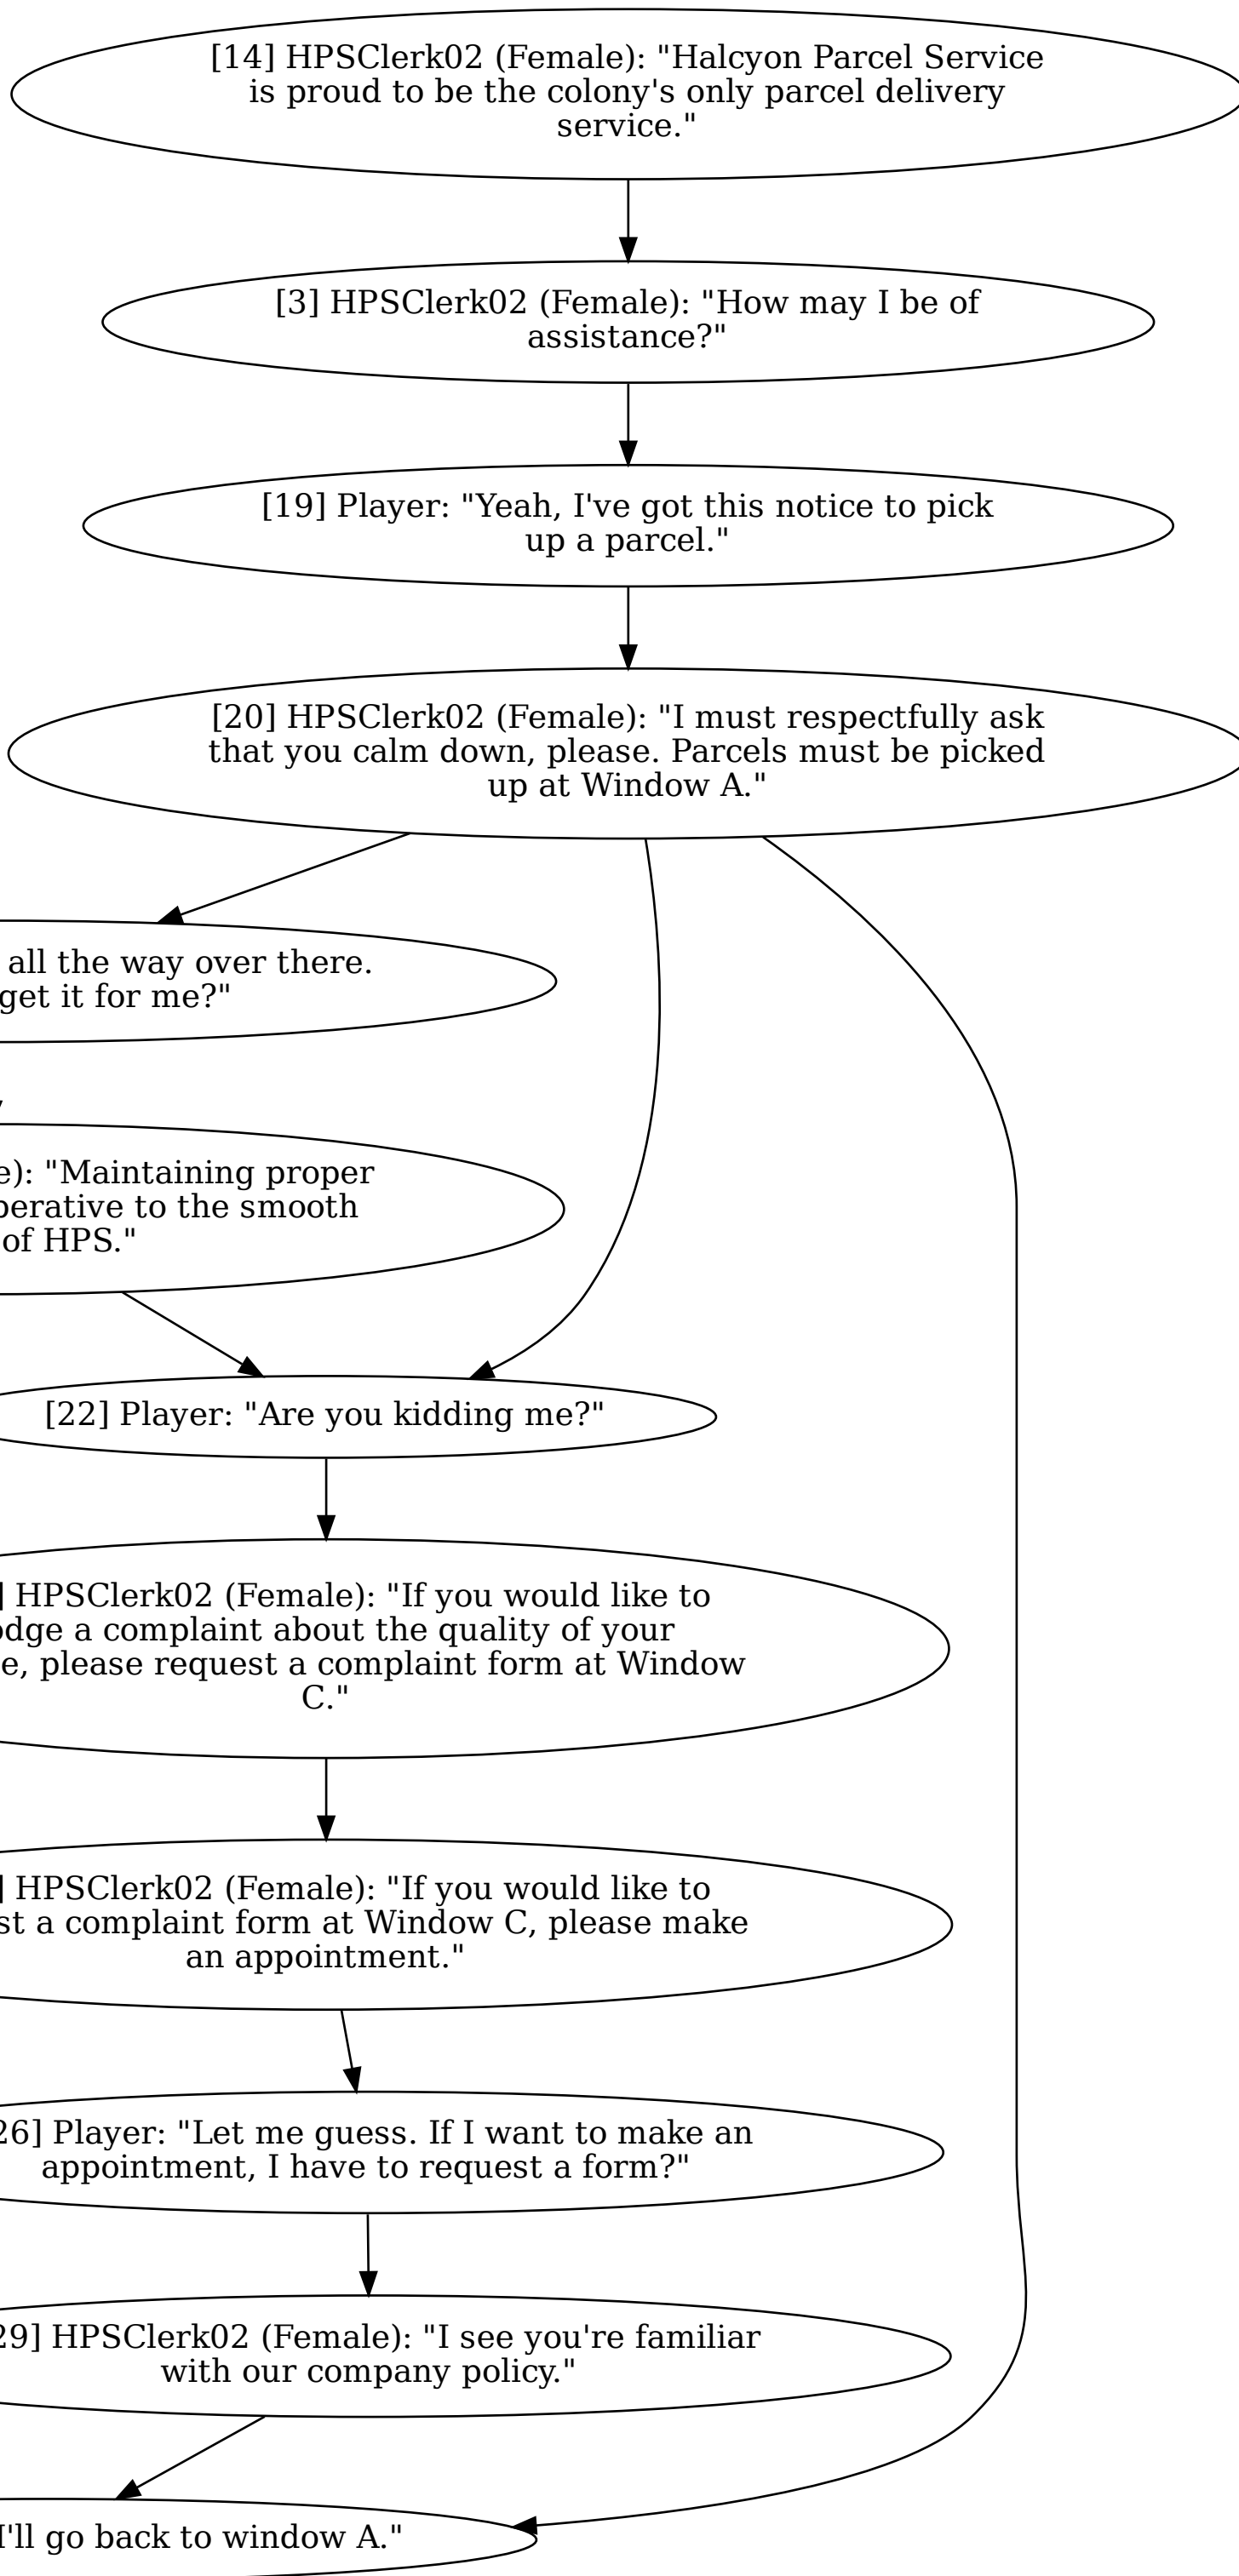

Supplement: software [file 2024.emnlp-main.520.software.zip]

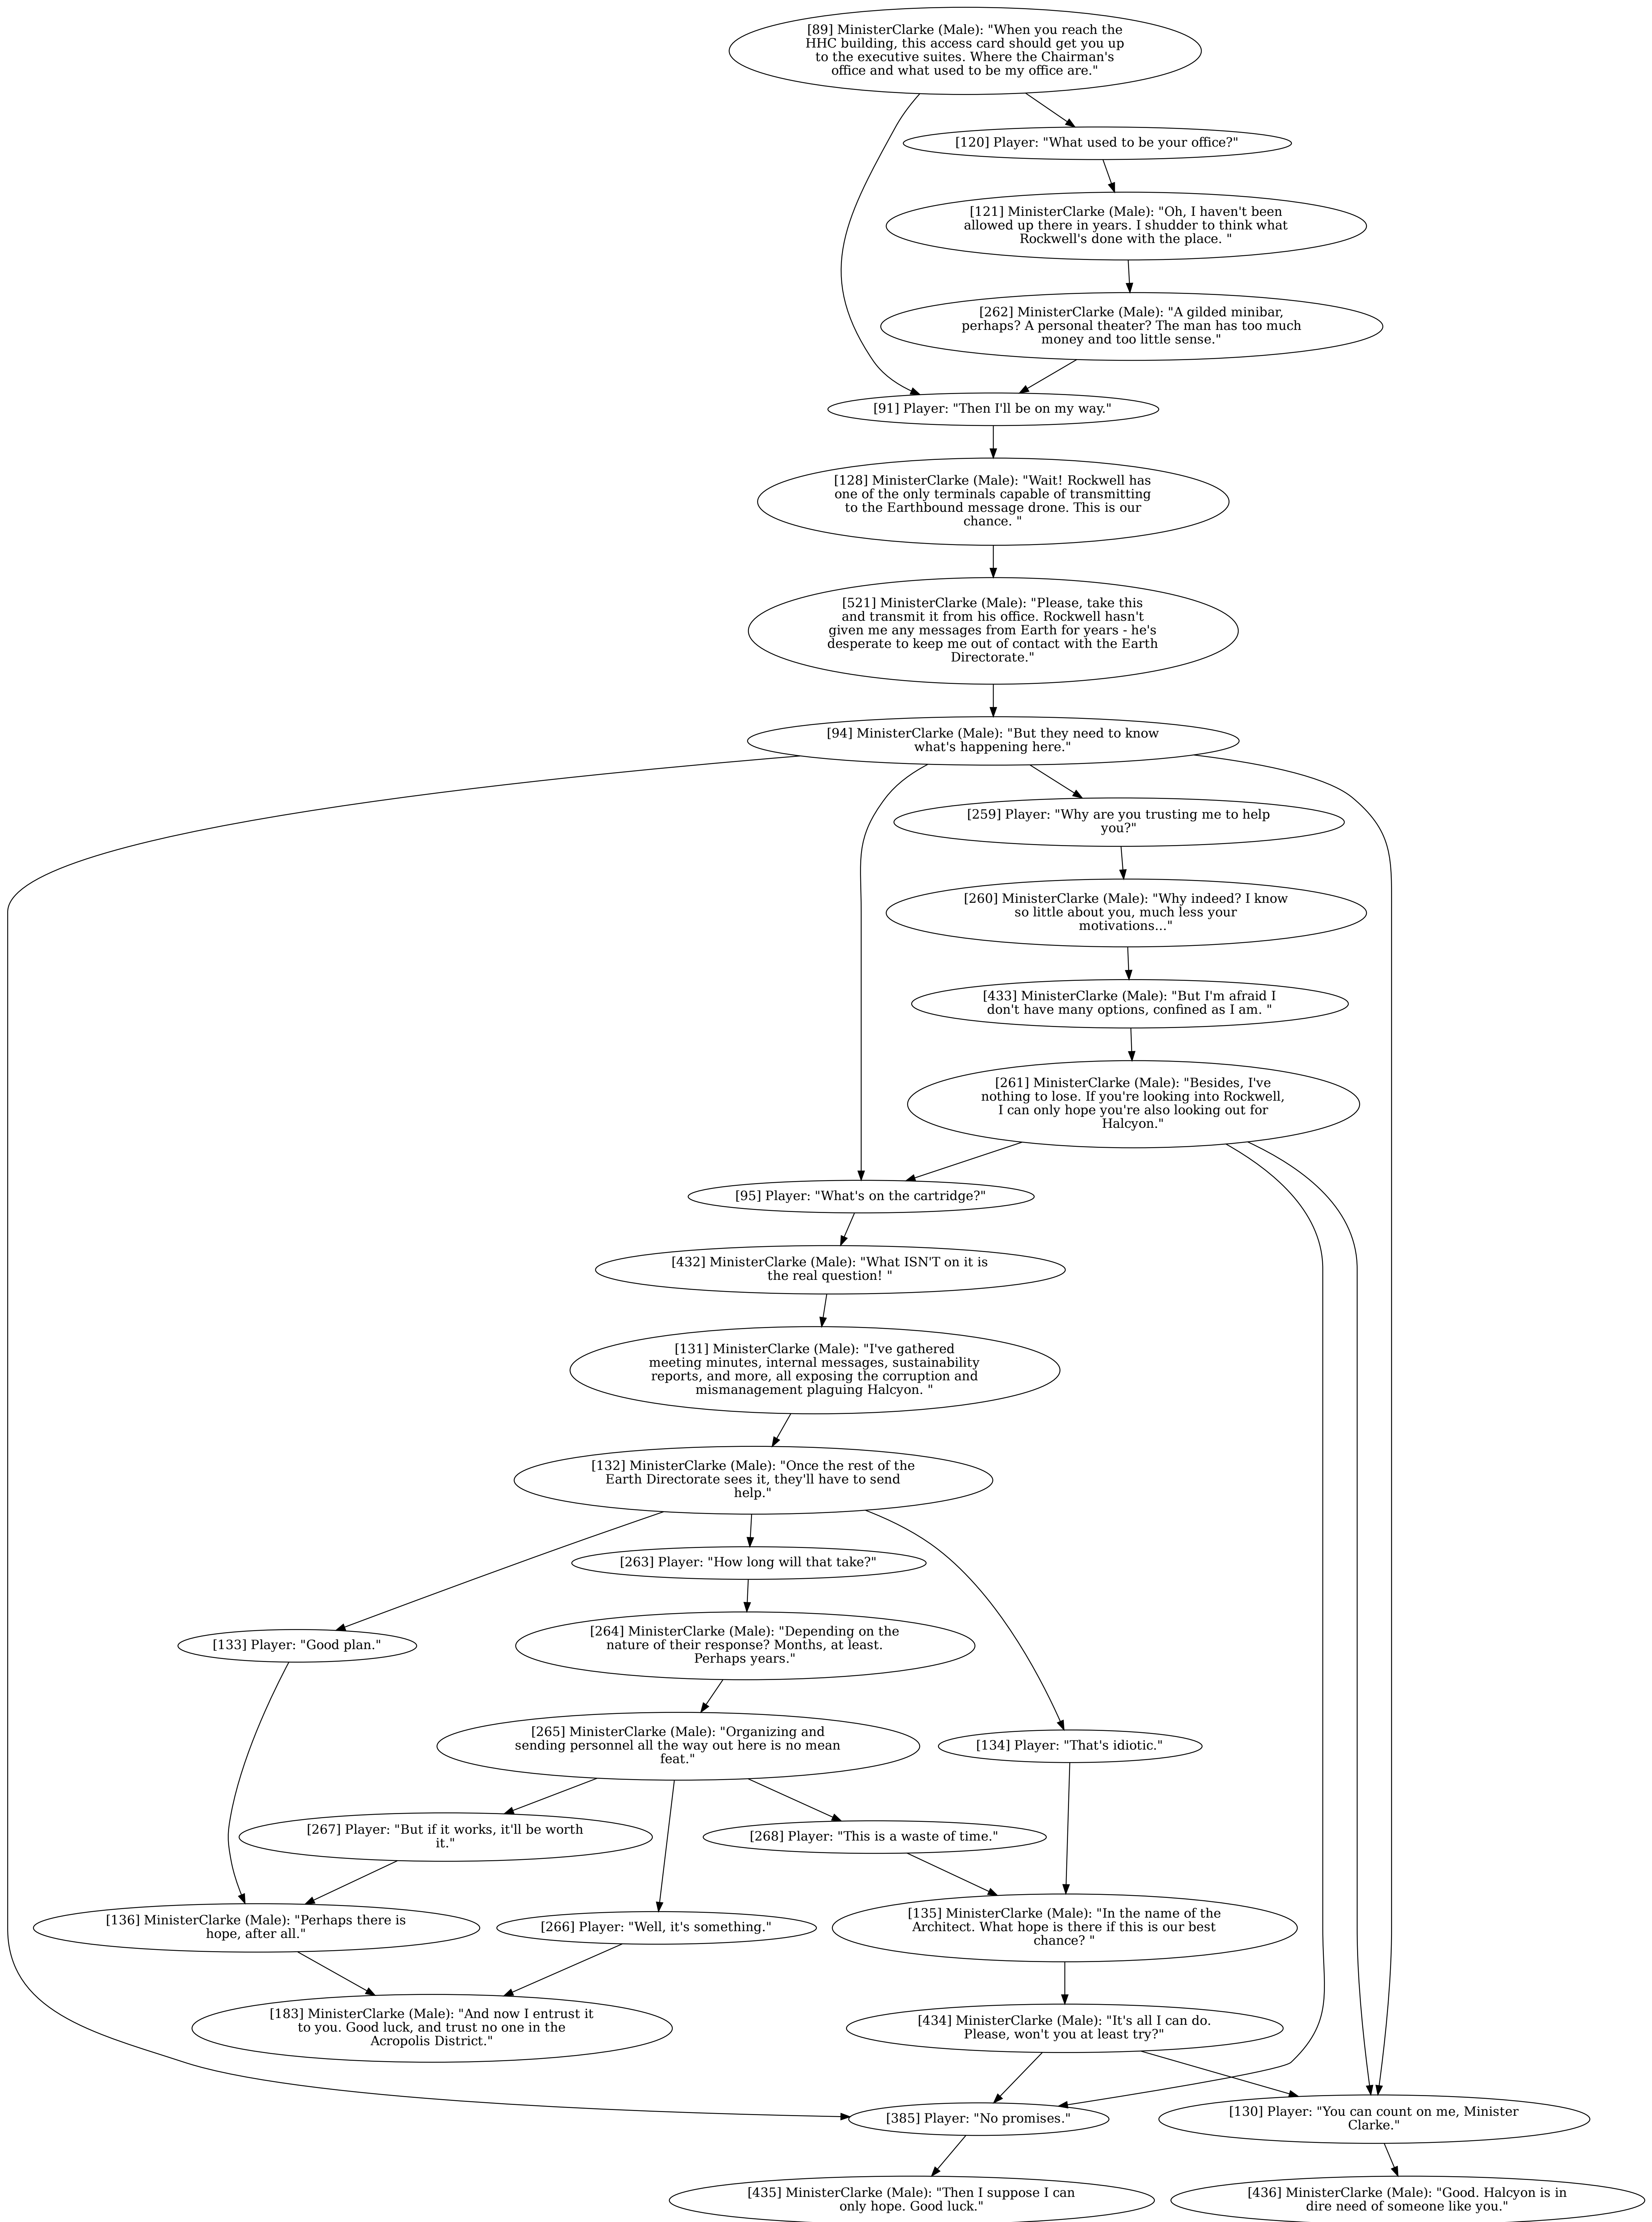

Supplement: software [file 2024.emnlp-main.520.software.zip]

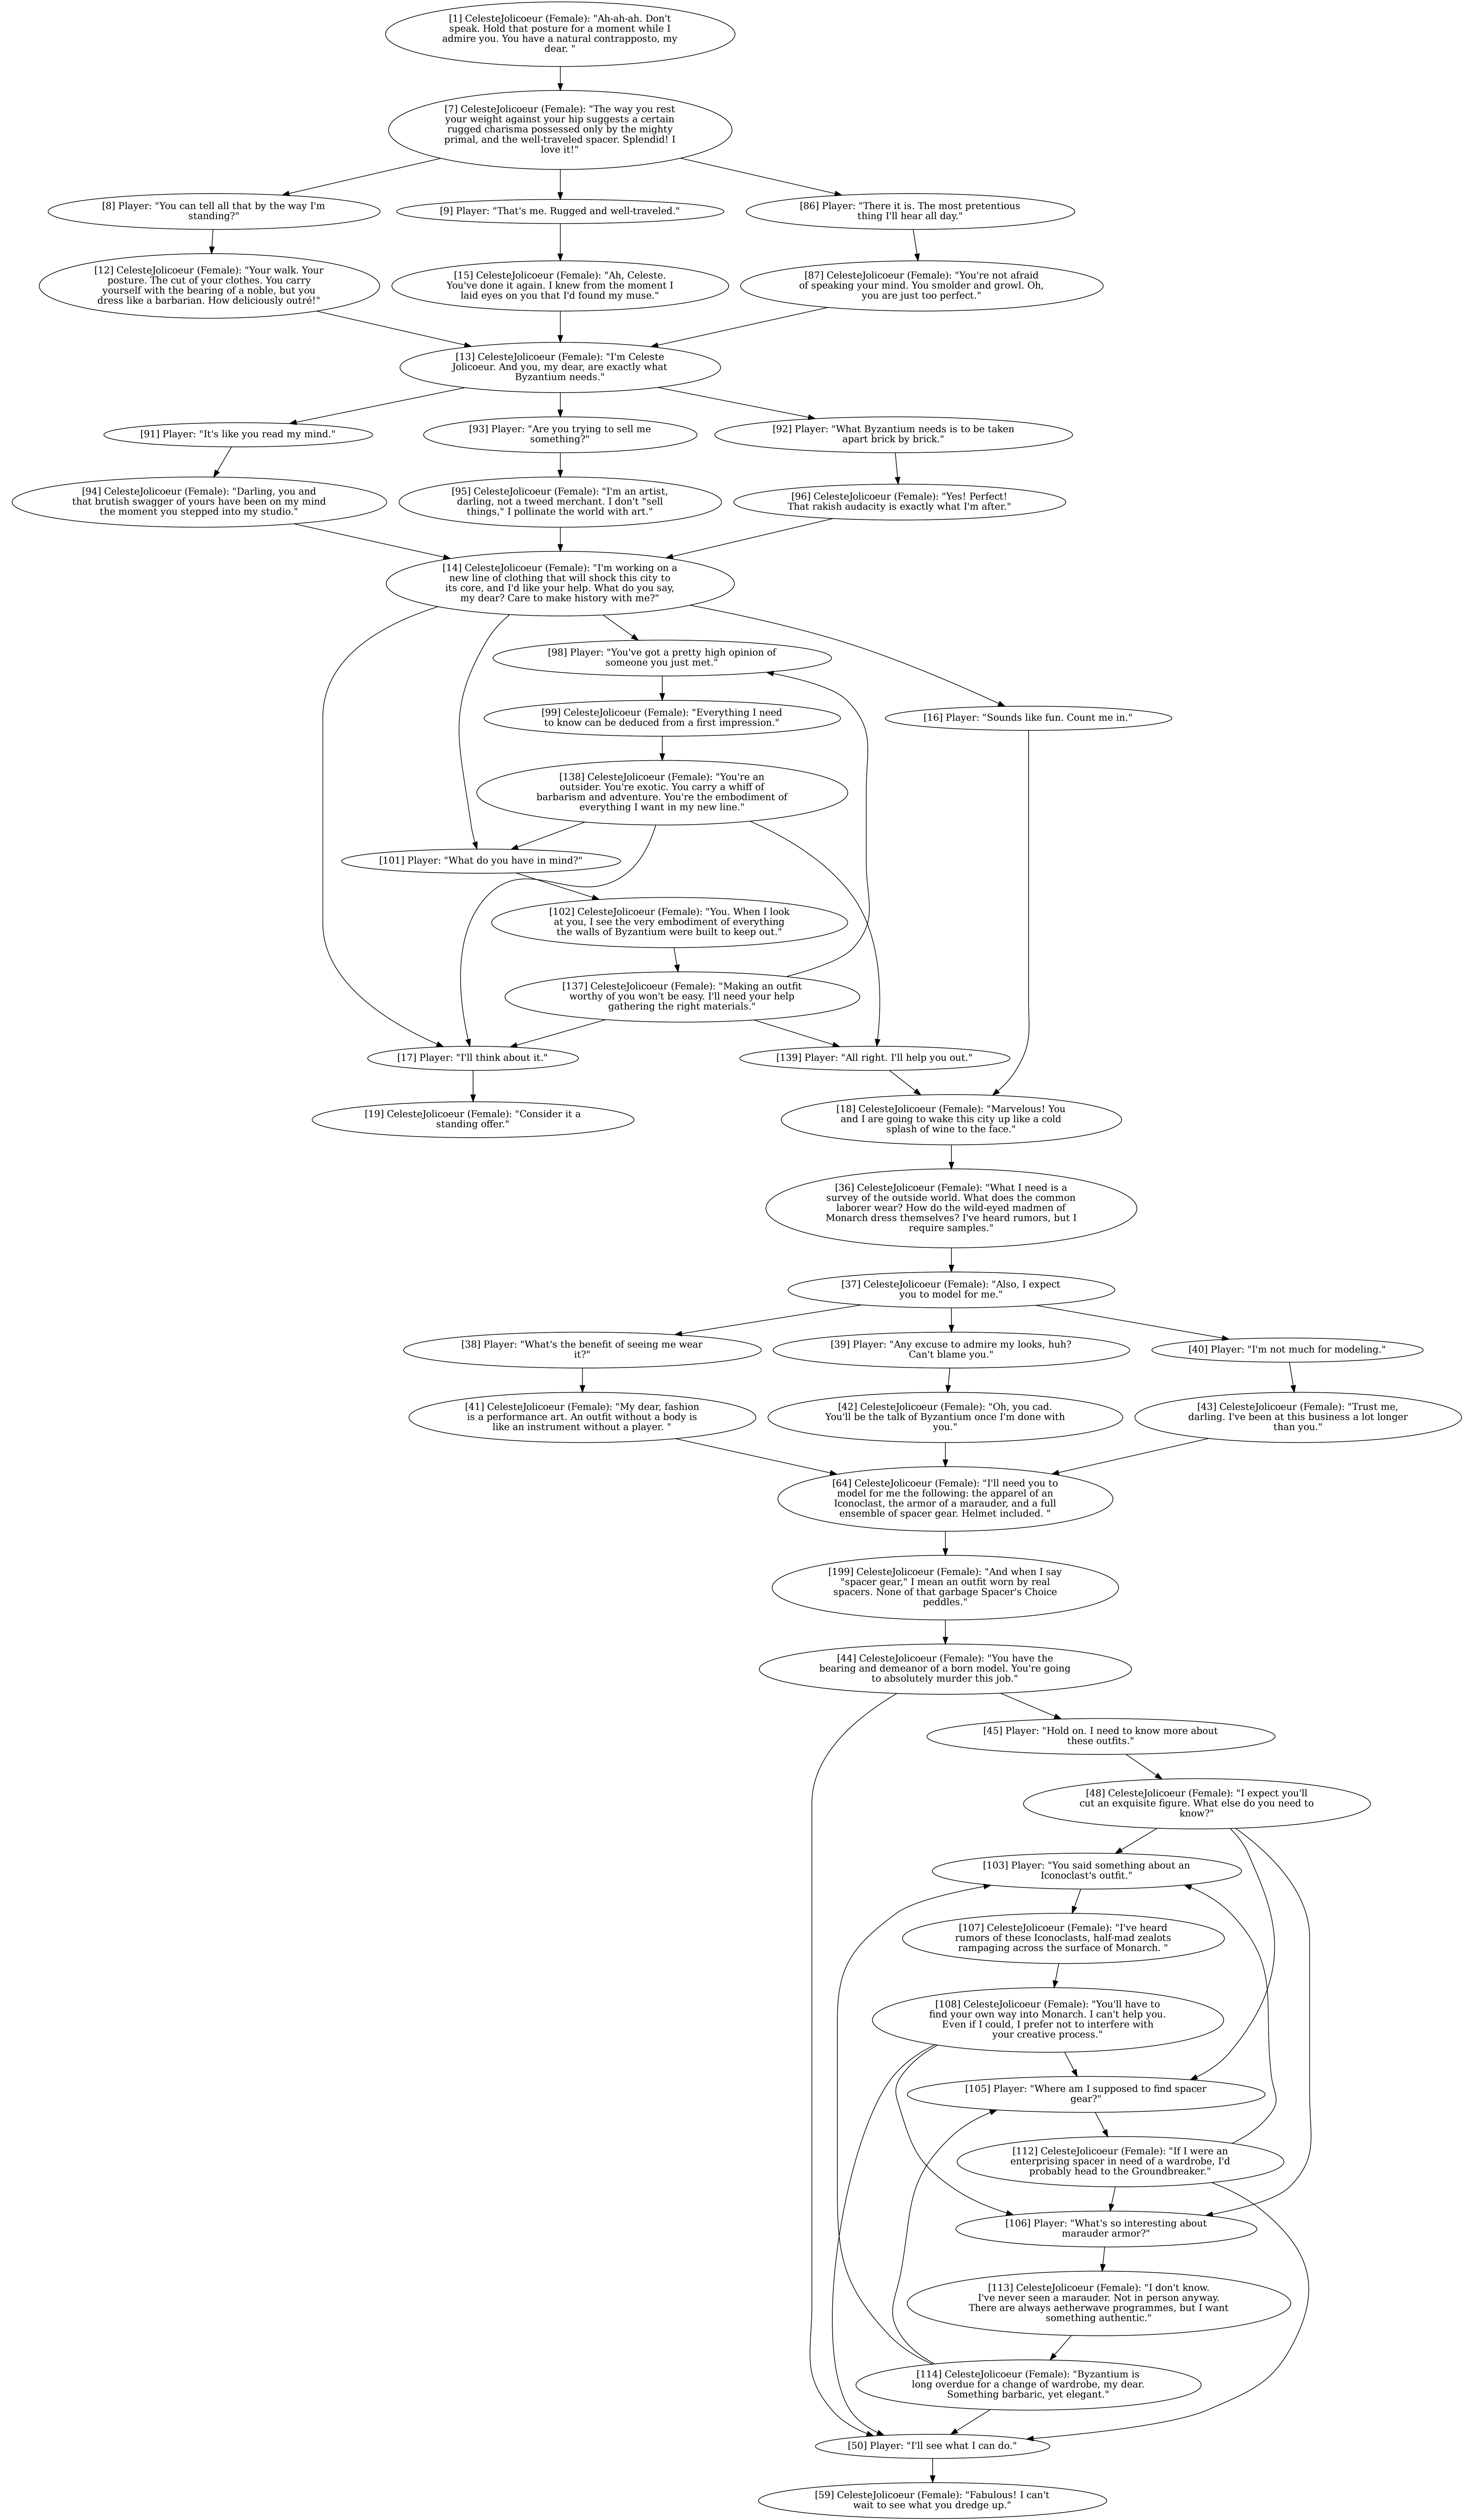

Supplement: software [file 2024.emnlp-main.520.software.zip]

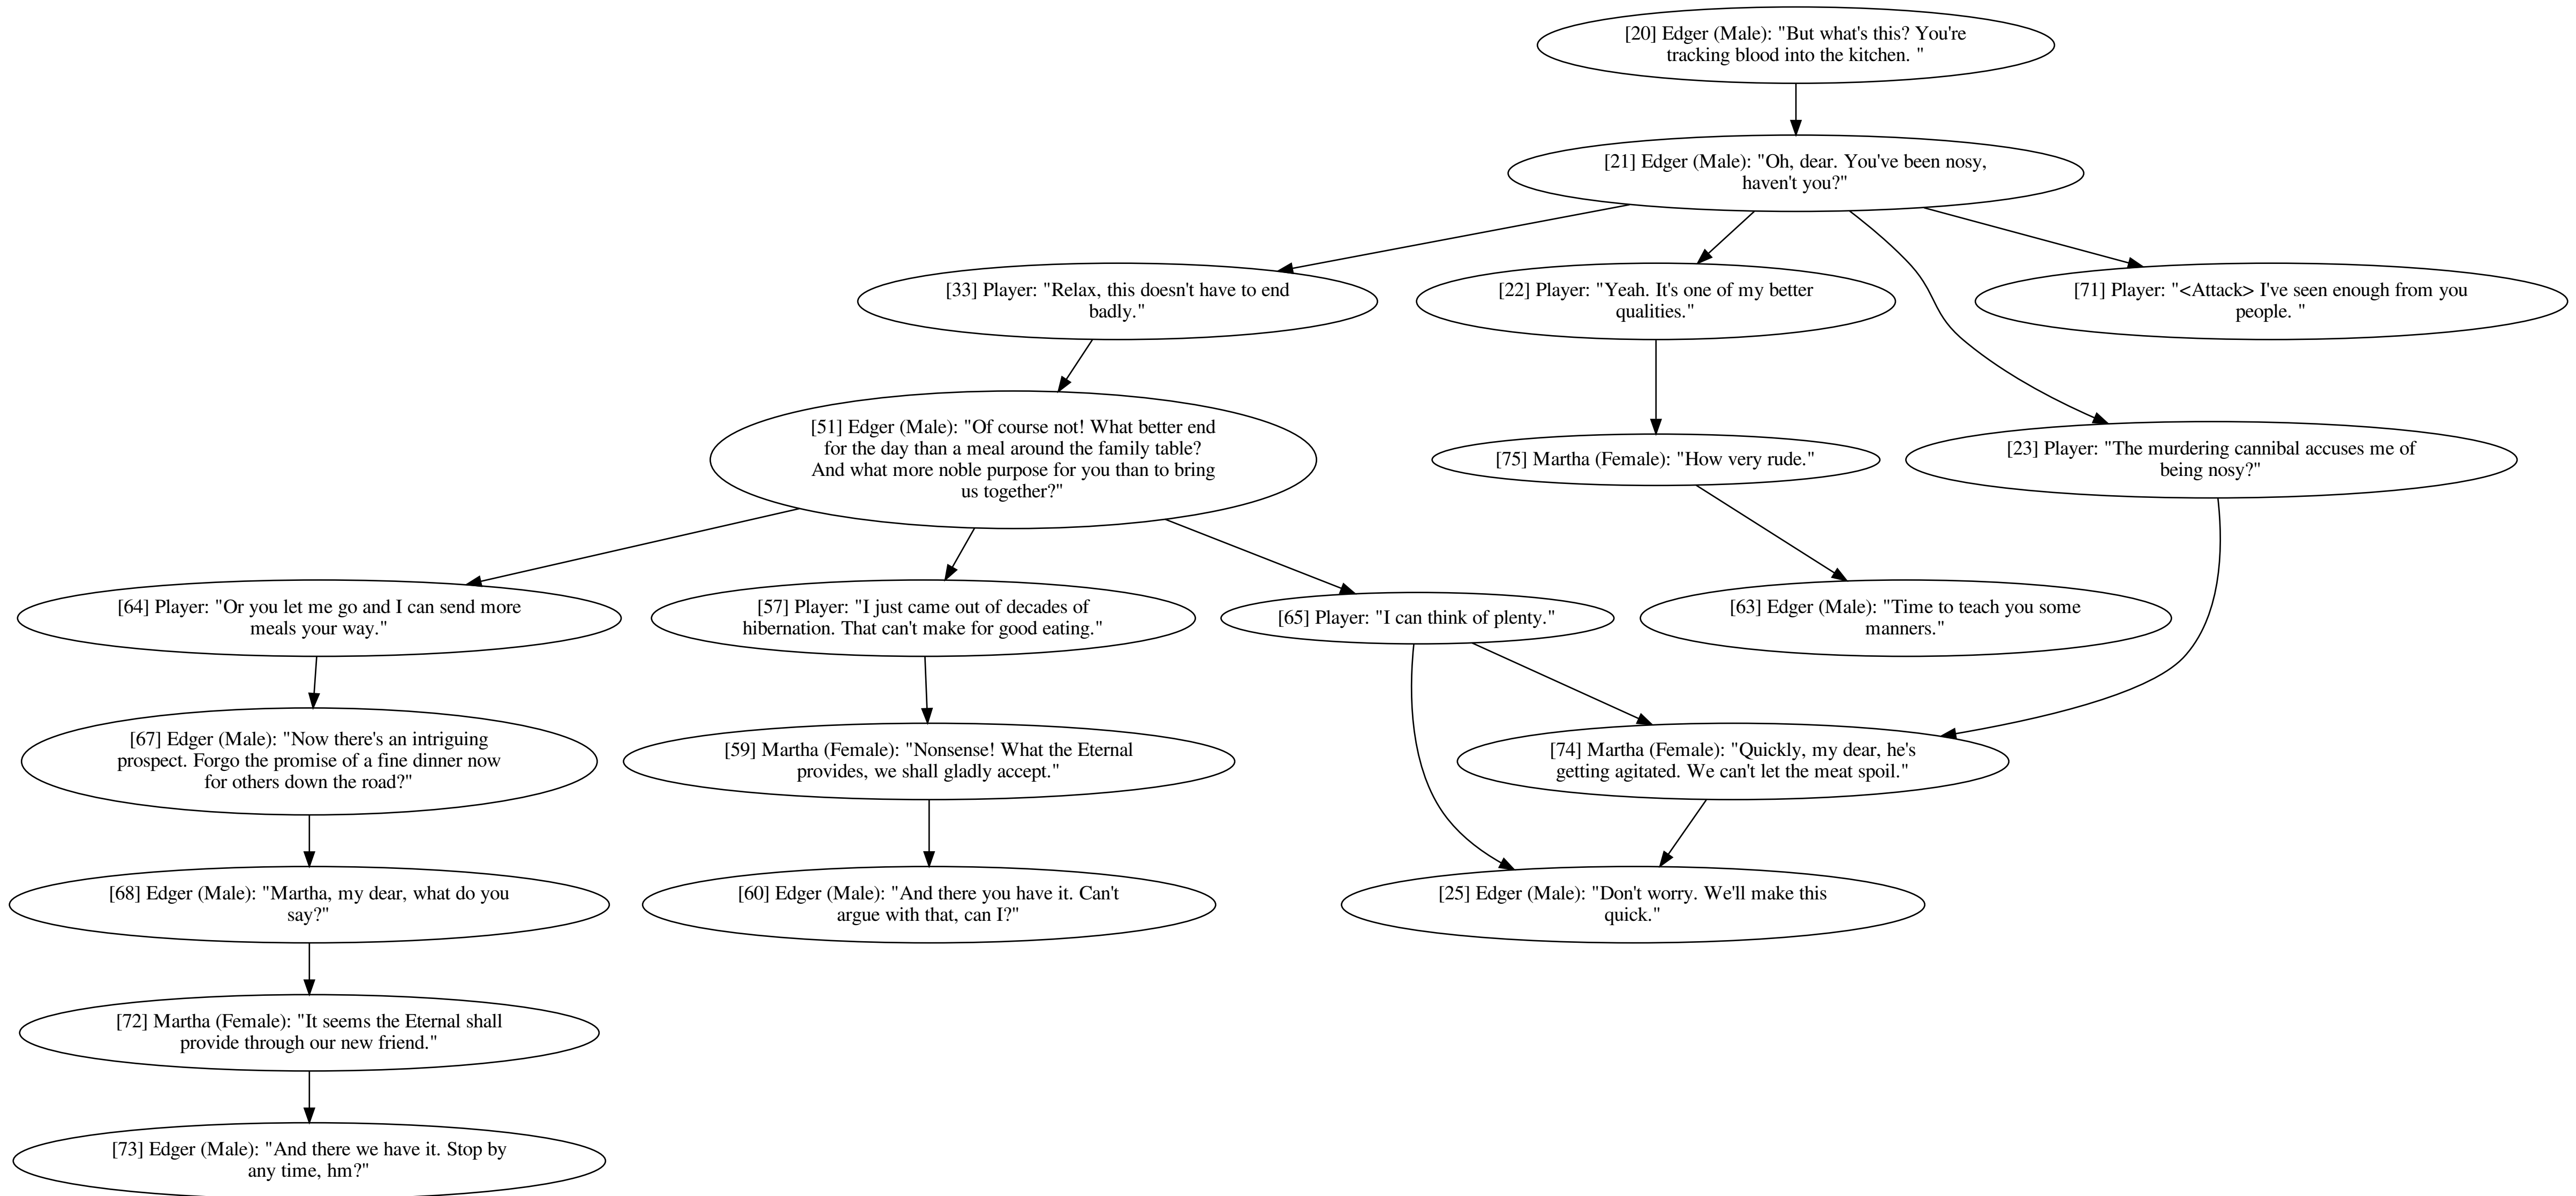

Supplement: software [file 2024.emnlp-main.520.software.zip]

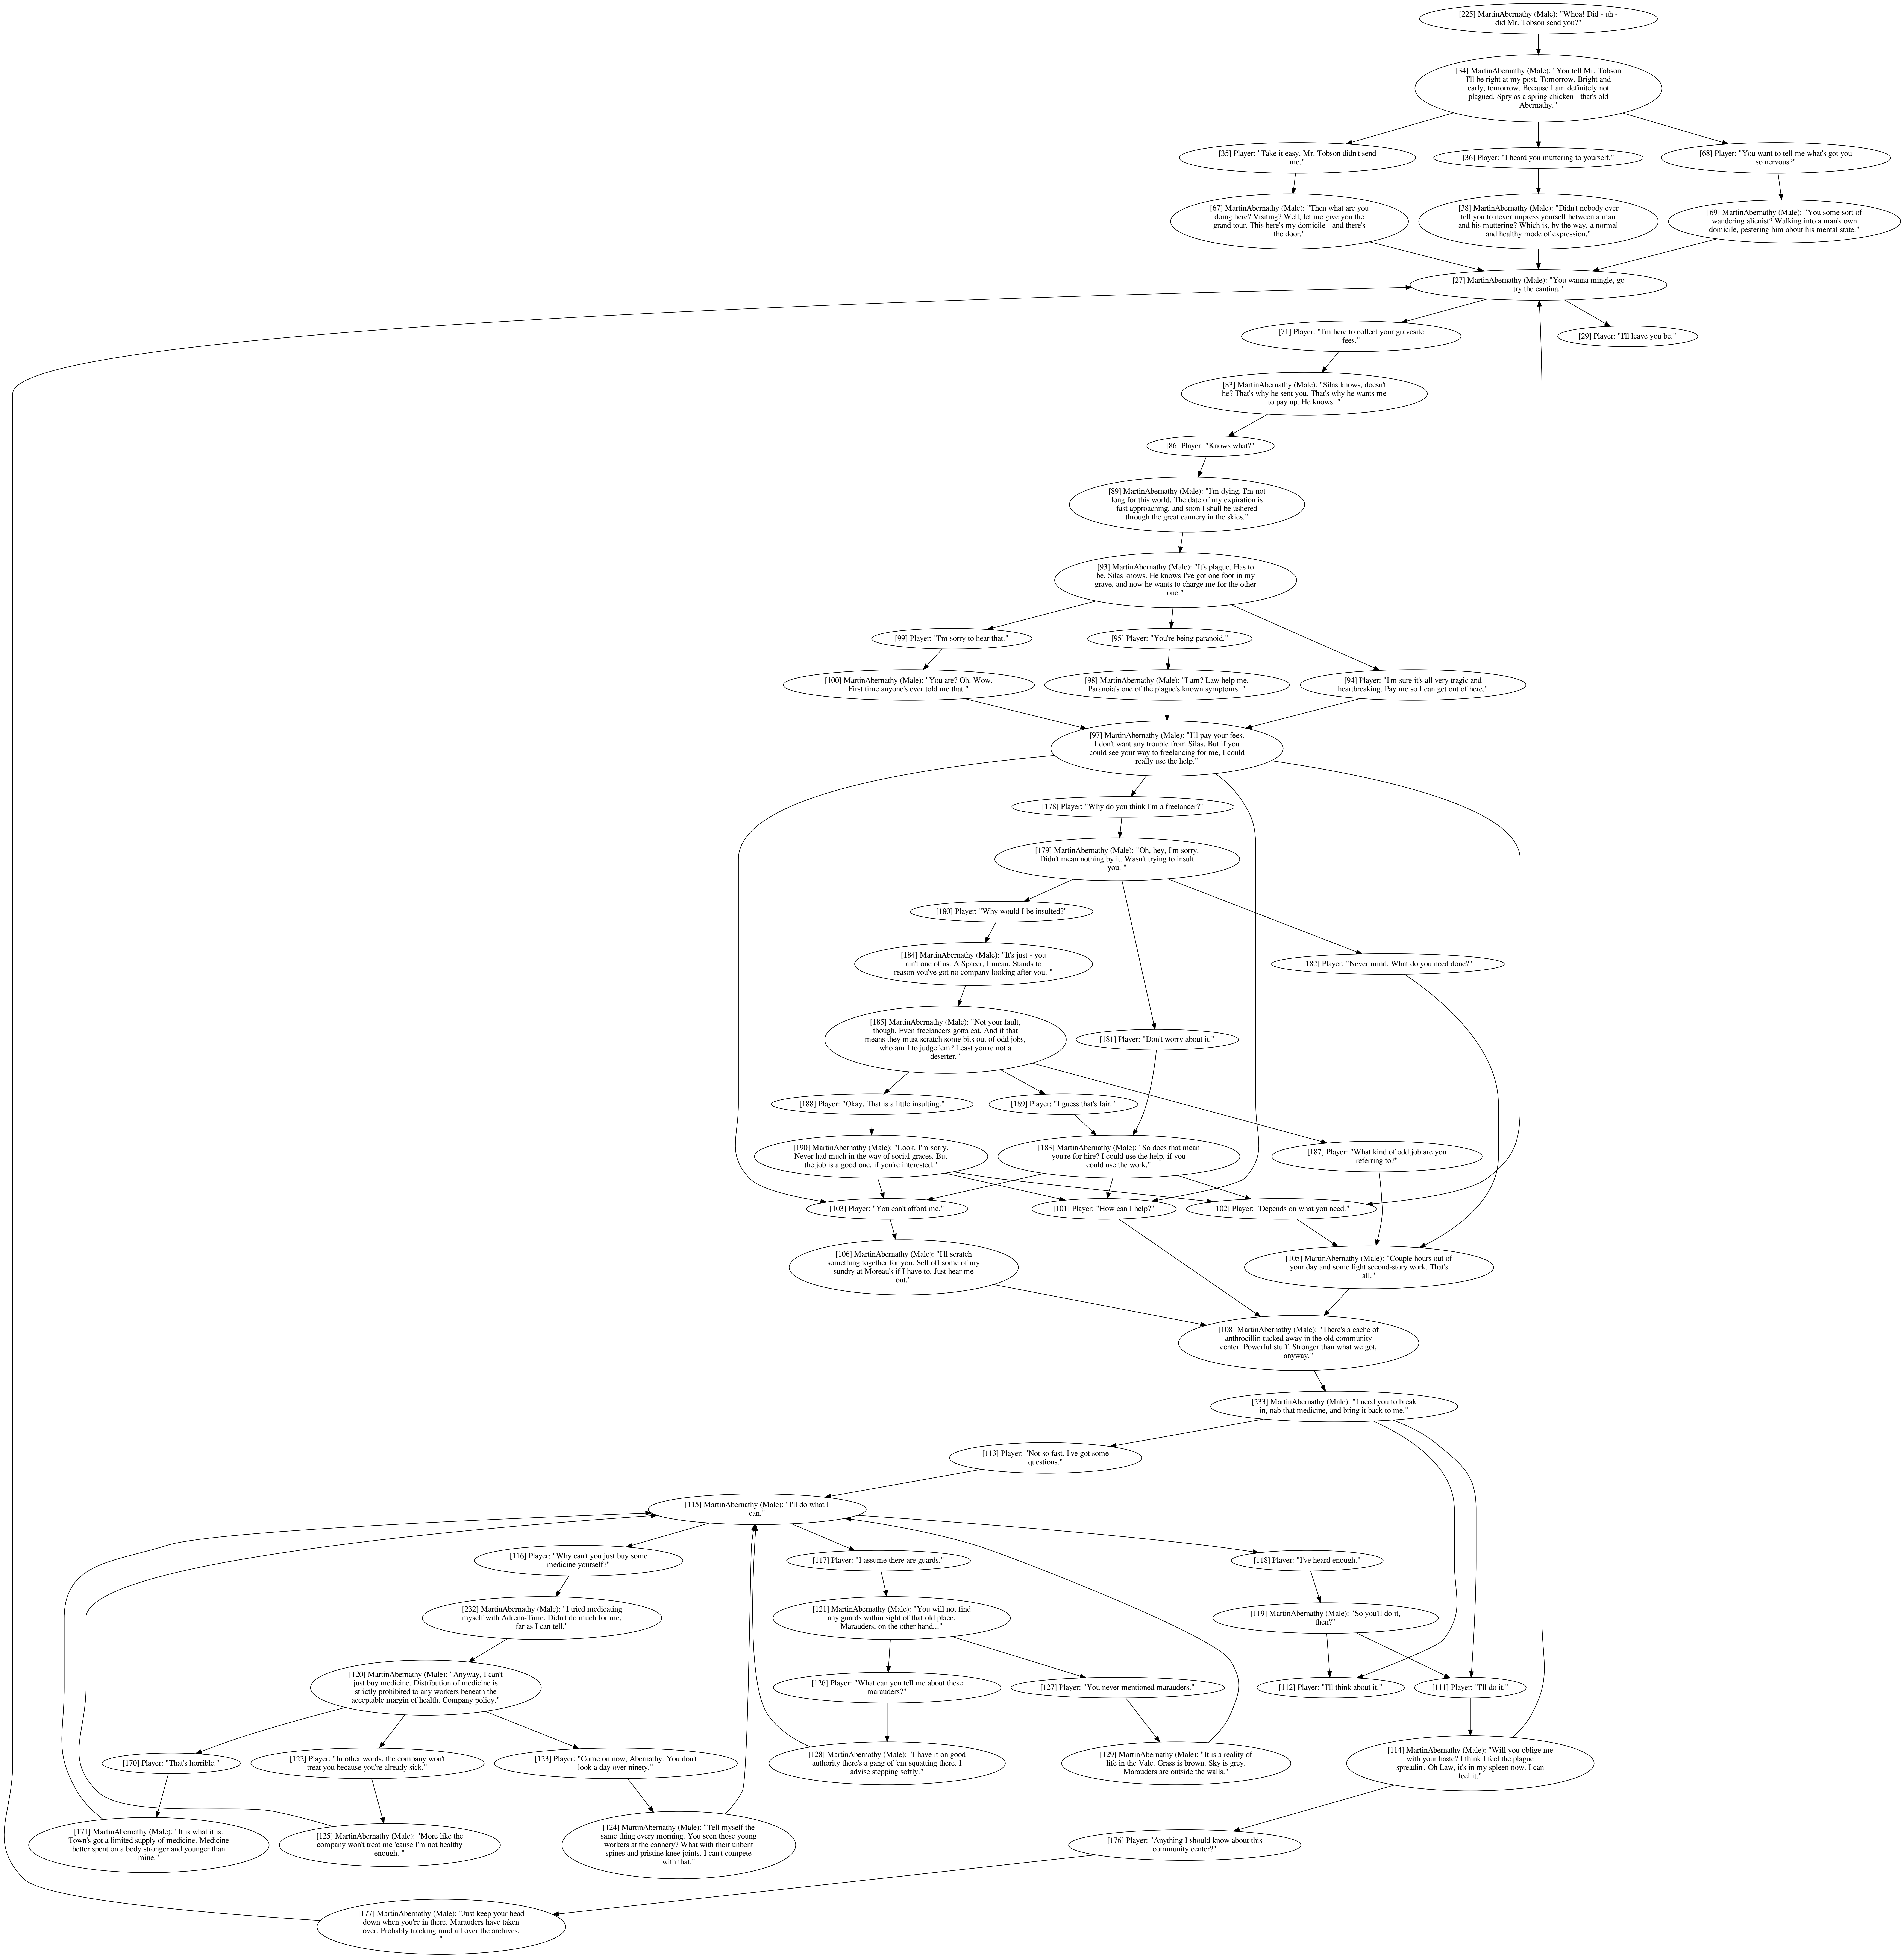

Supplement: software [file 2024.emnlp-main.520.software.zip]

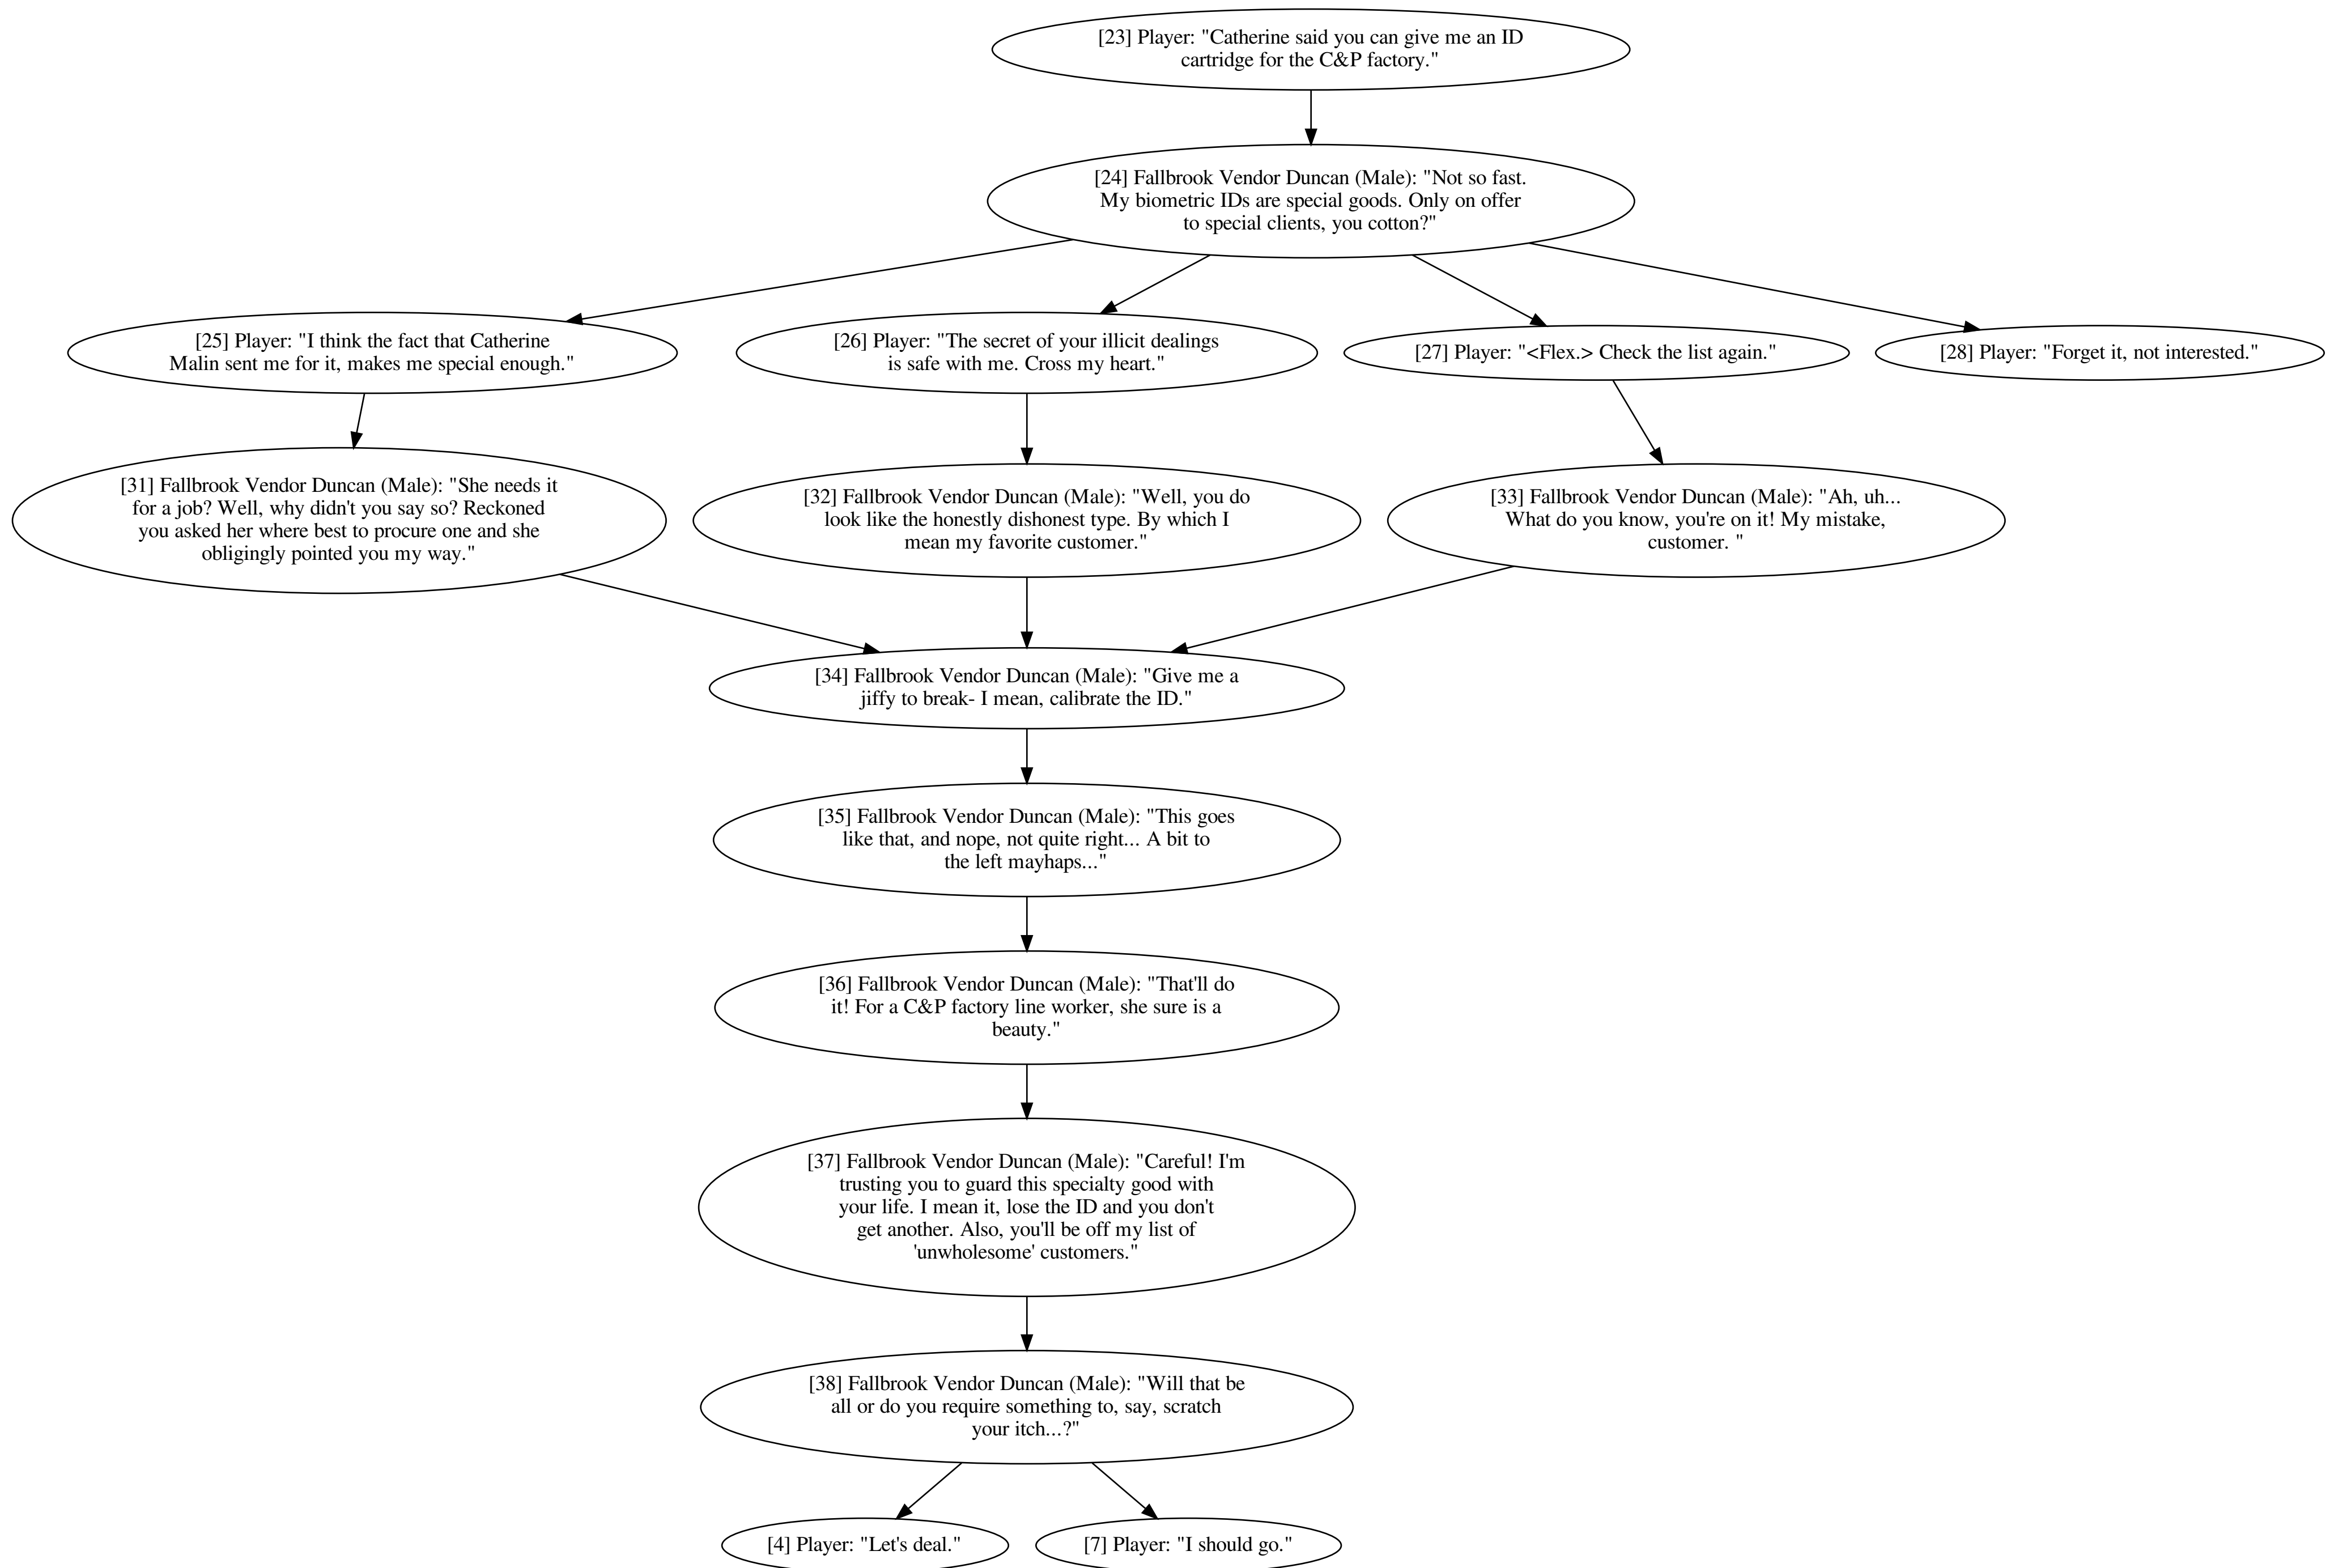

Supplement: software [file 2024.emnlp-main.520.software.zip]

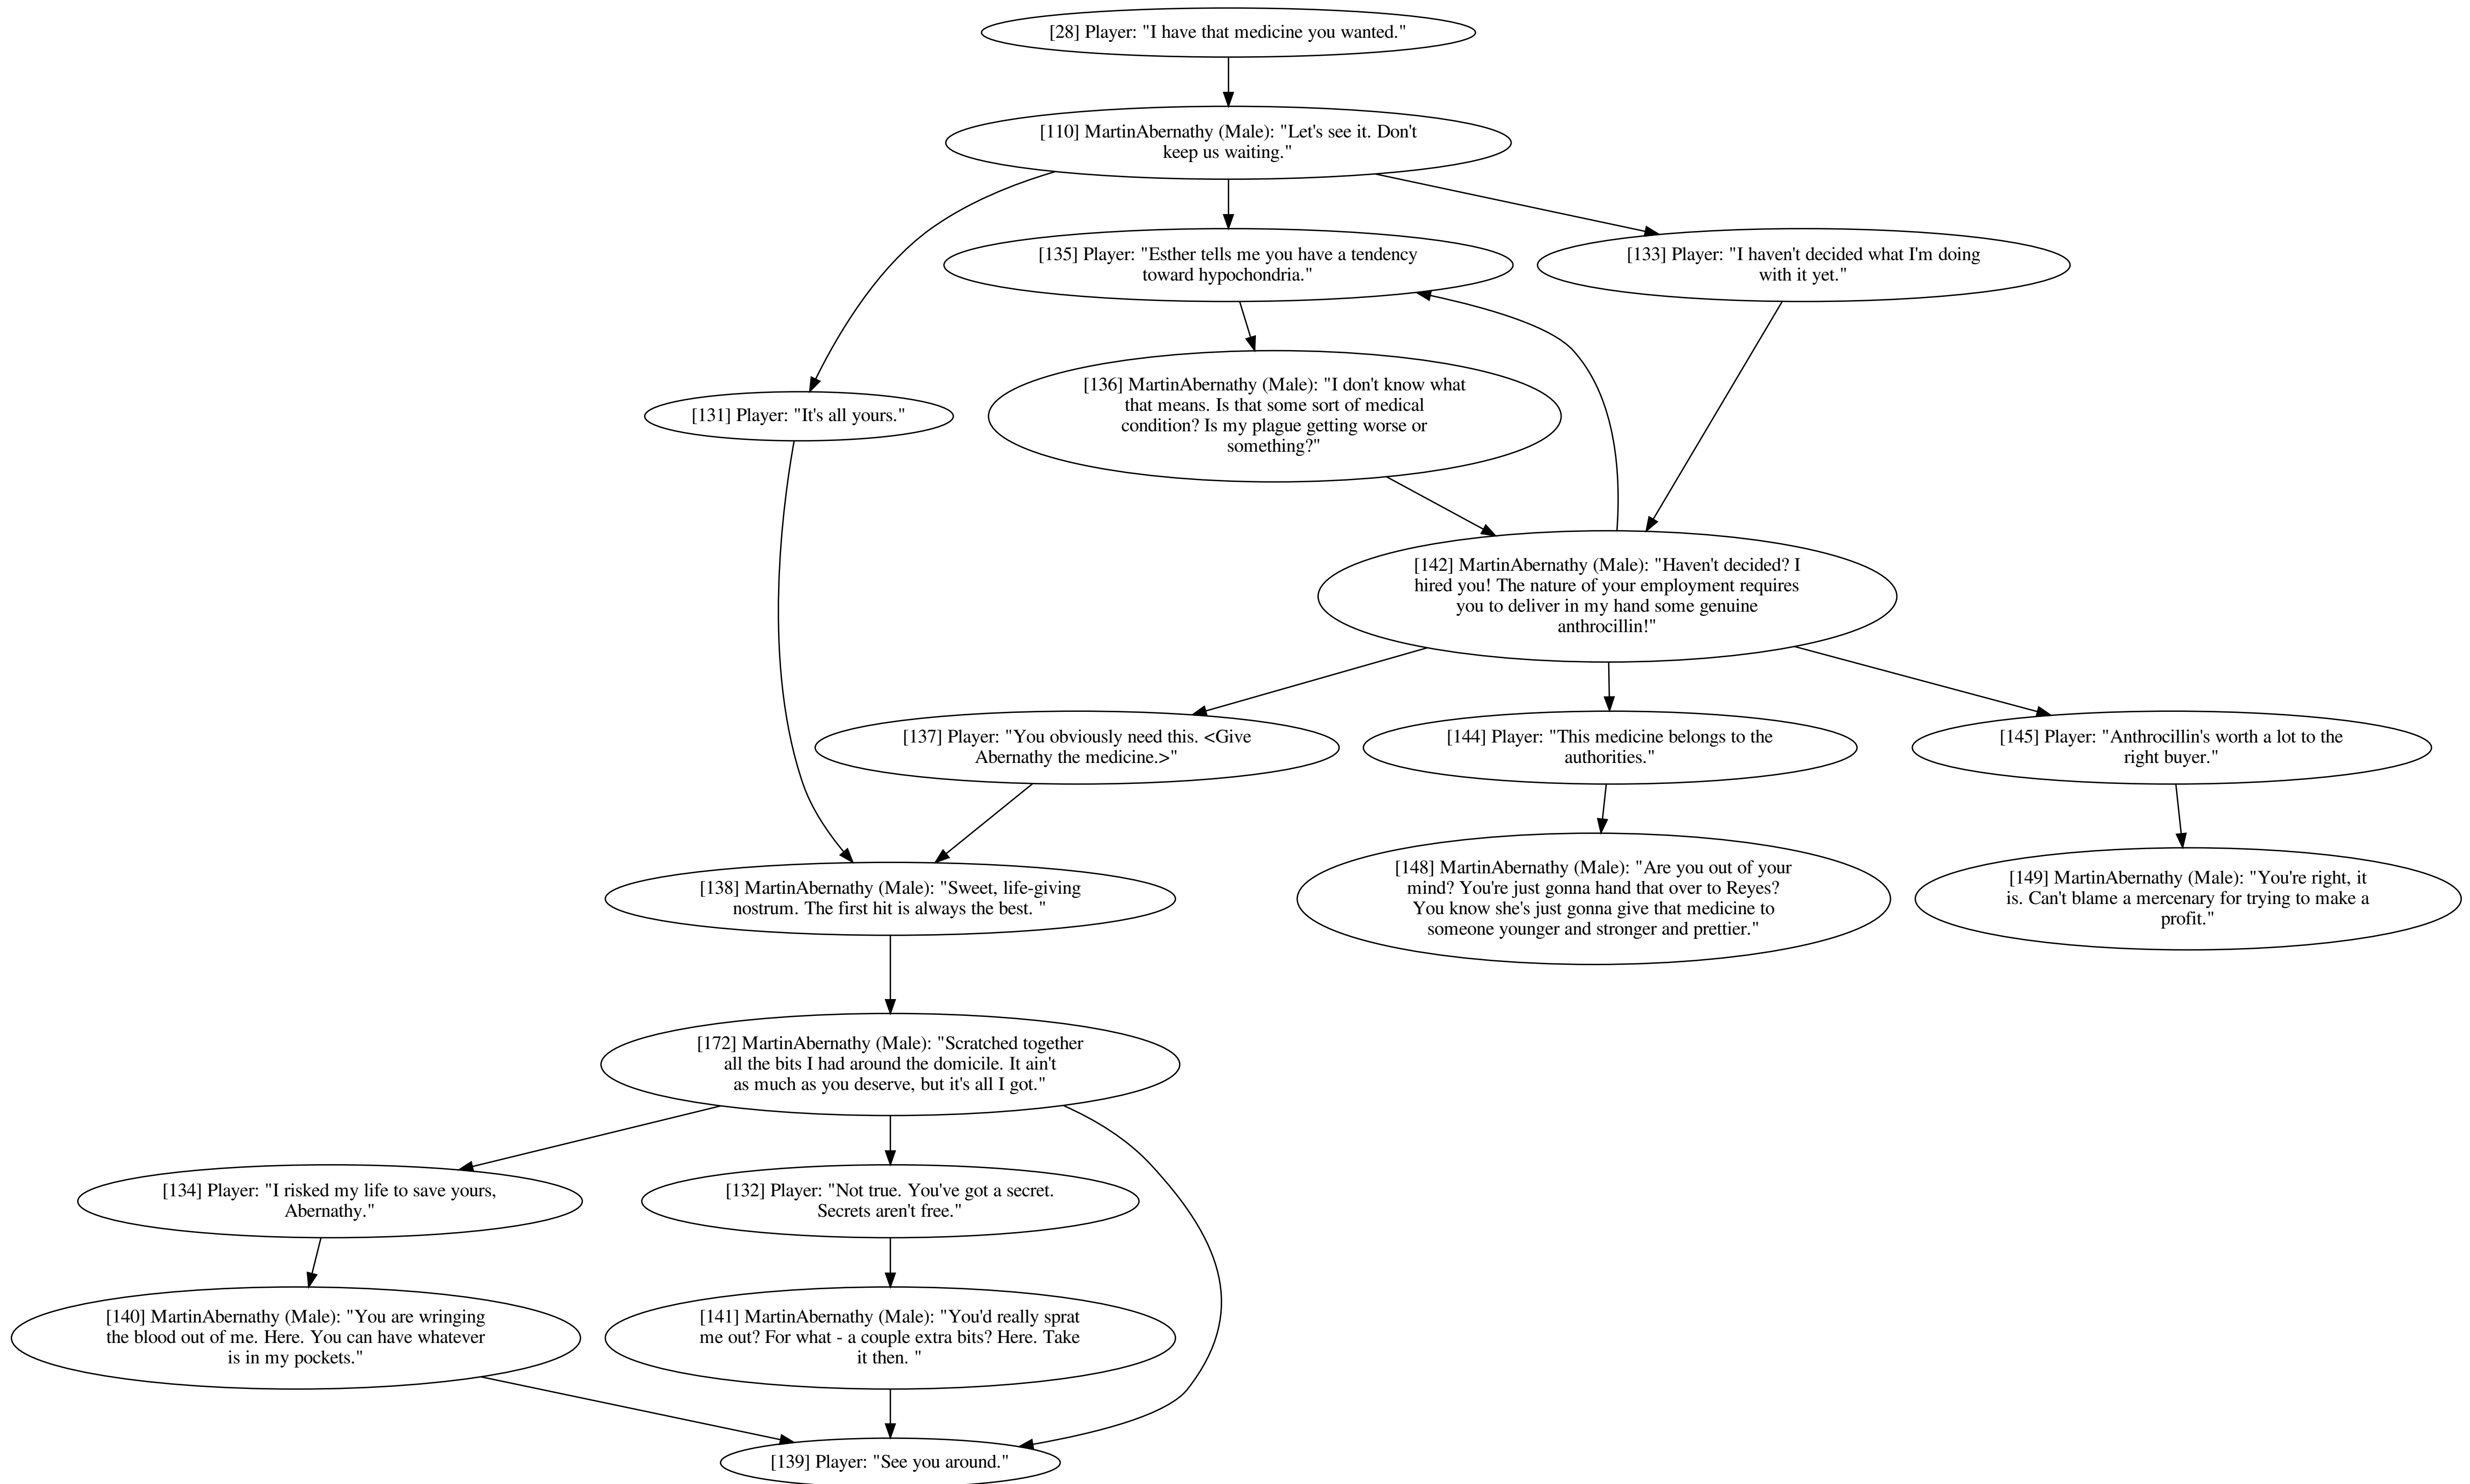

Supplement: software [file 2024.emnlp-main.520.software.zip]

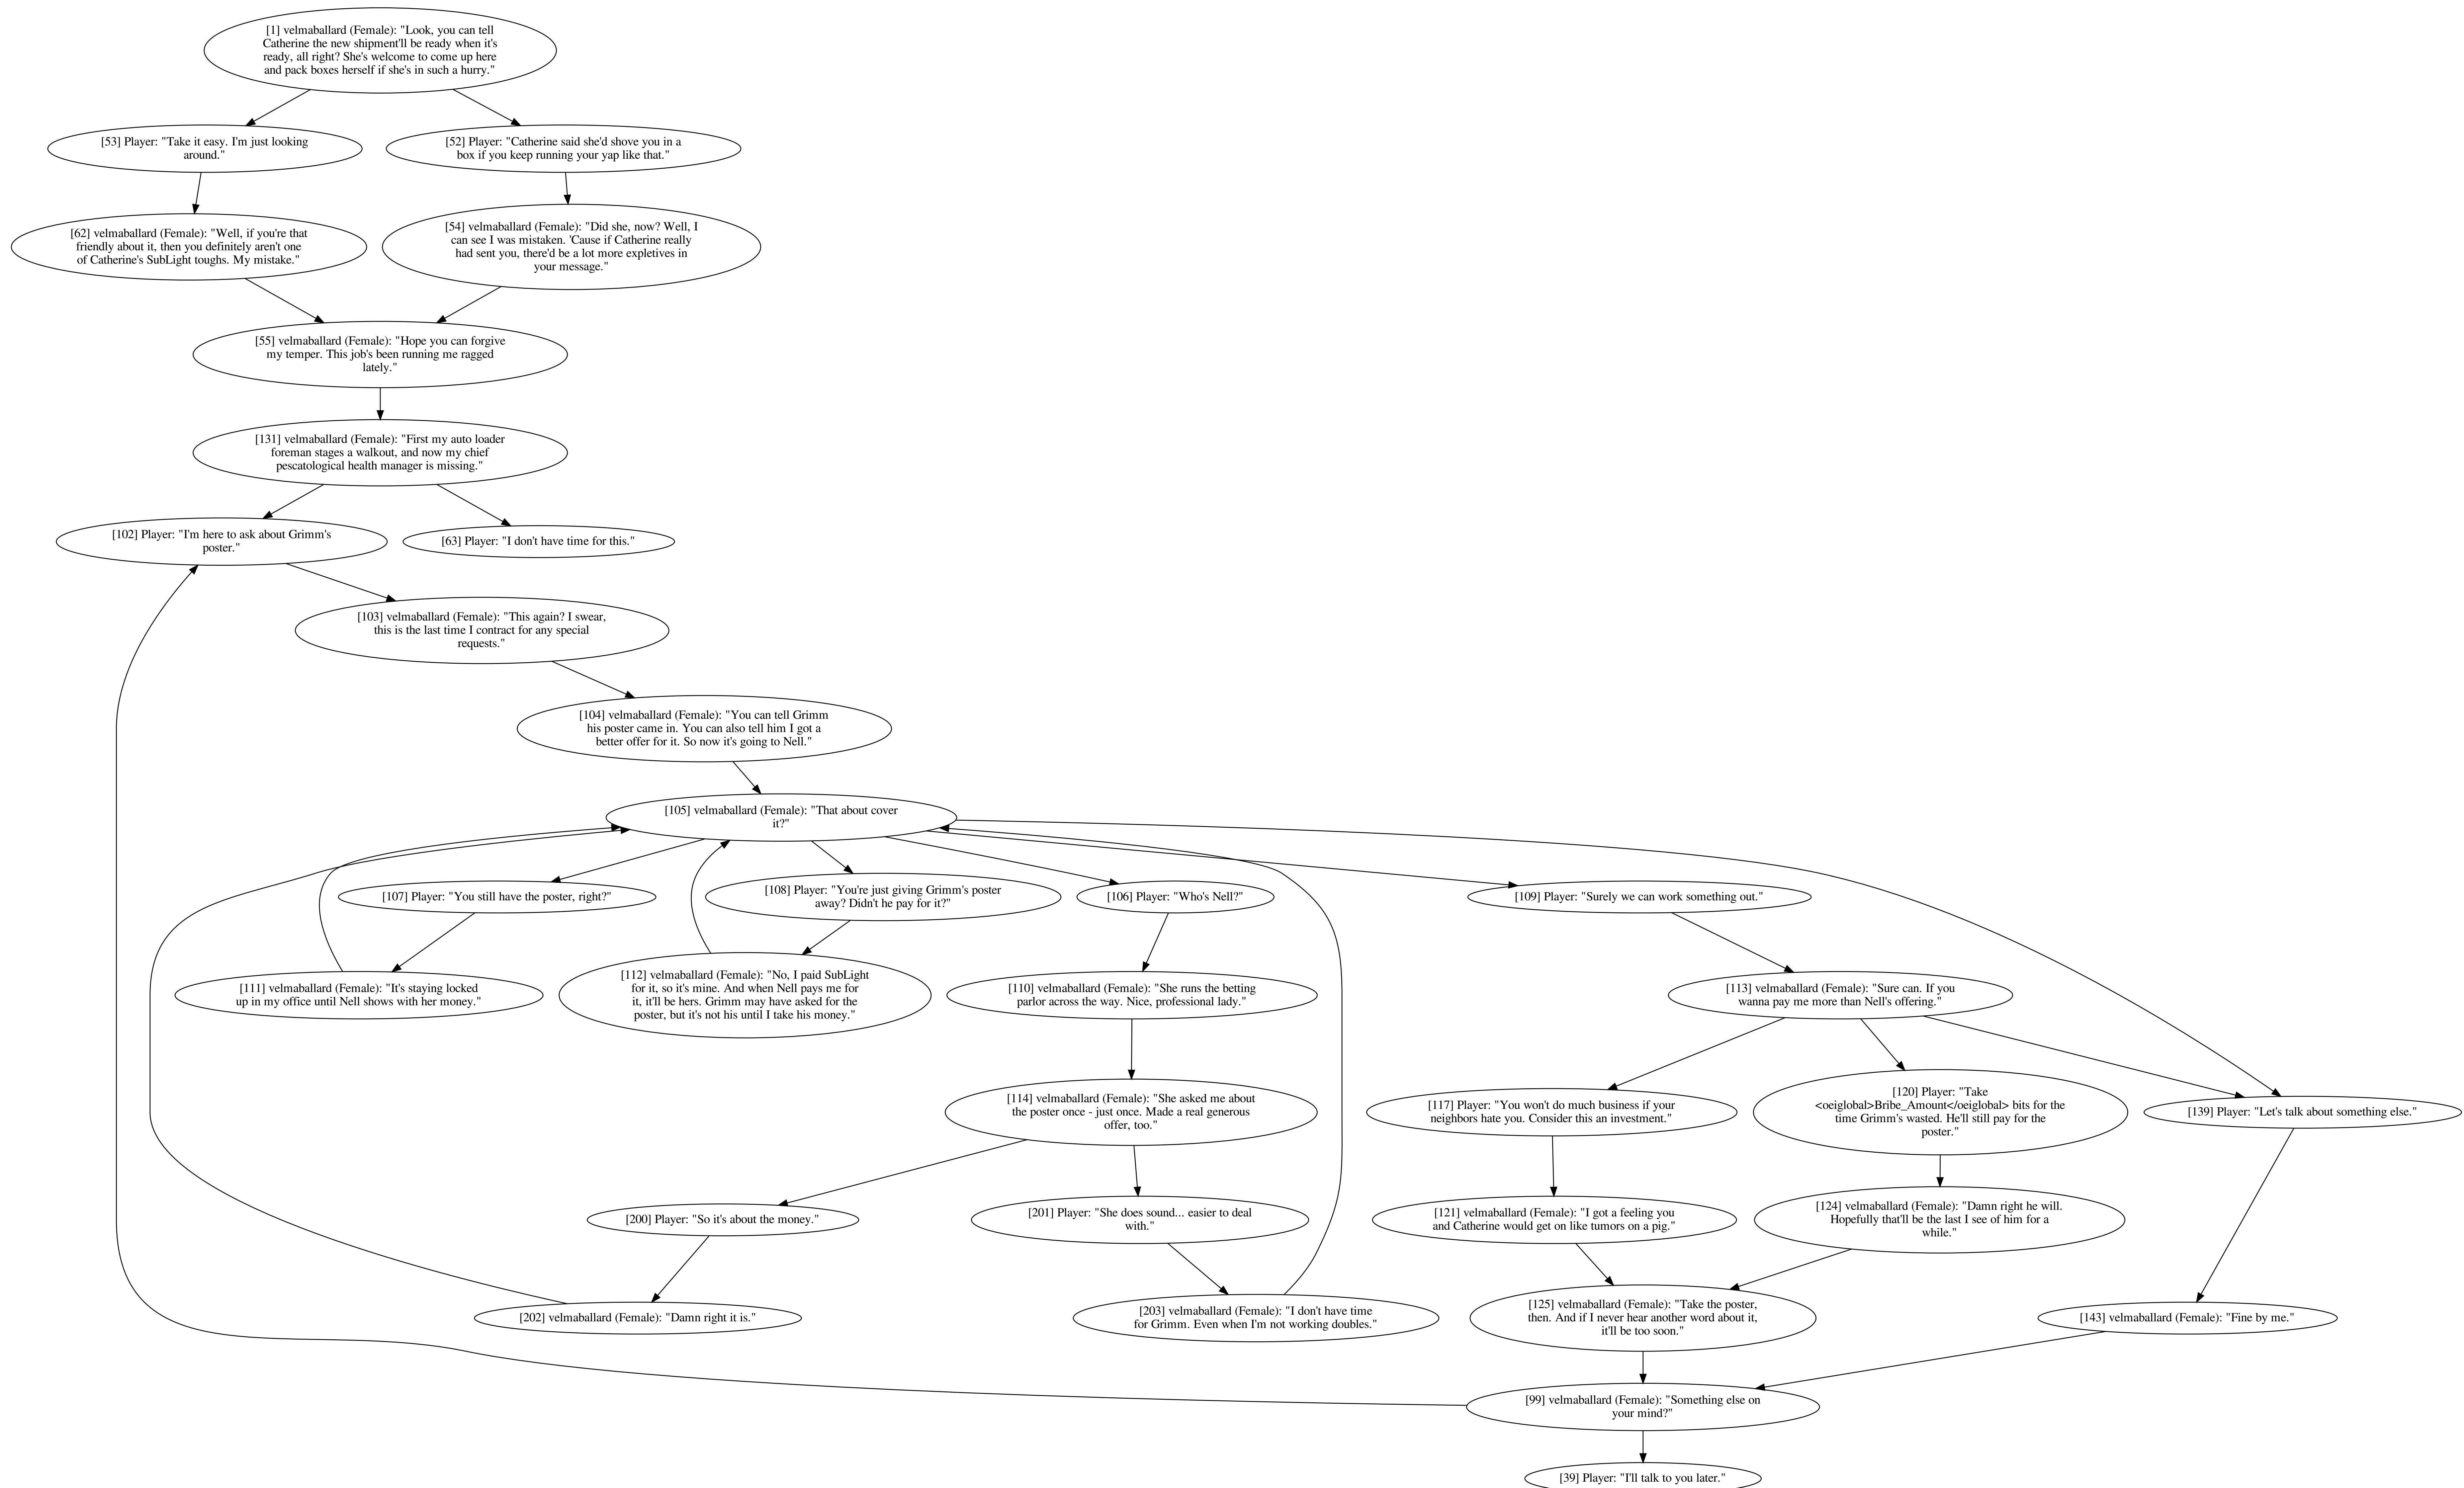

Supplement: software [file 2024.emnlp-main.520.software.zip]

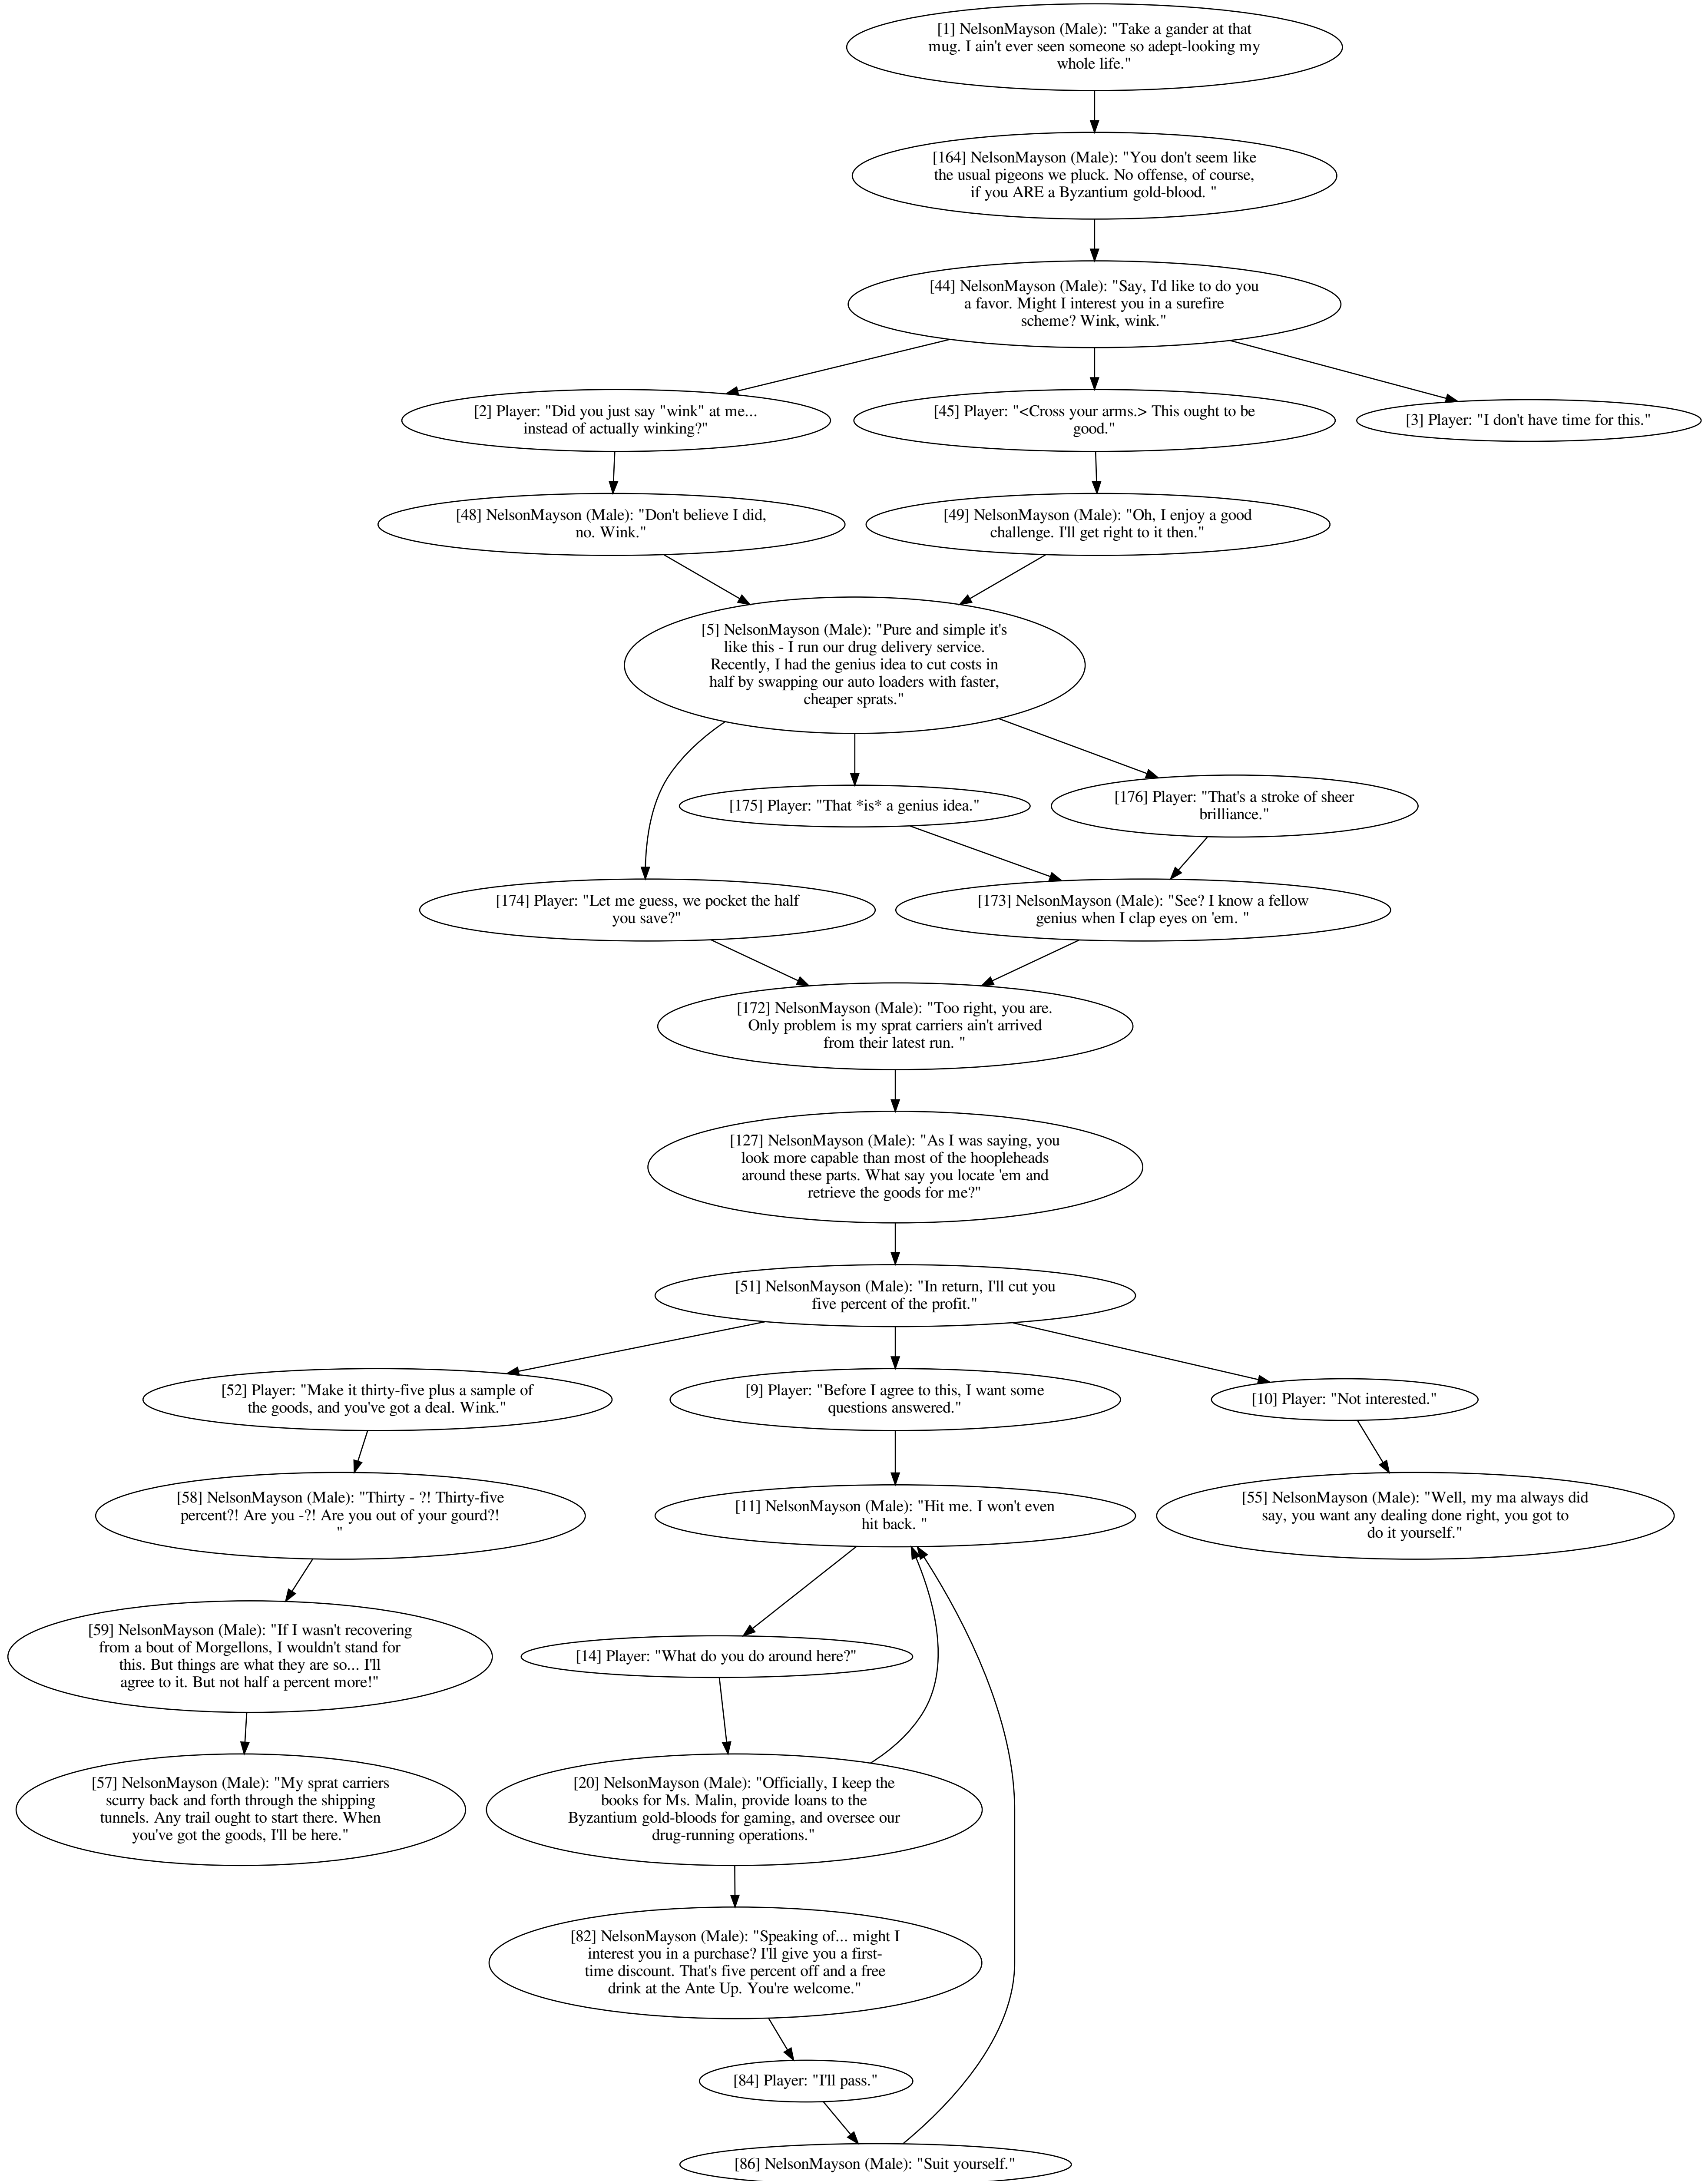

Supplement: software [file 2024.emnlp-main.520.software.zip]



Supplement: software [file 2024.emnlp-main.520.software.zip]

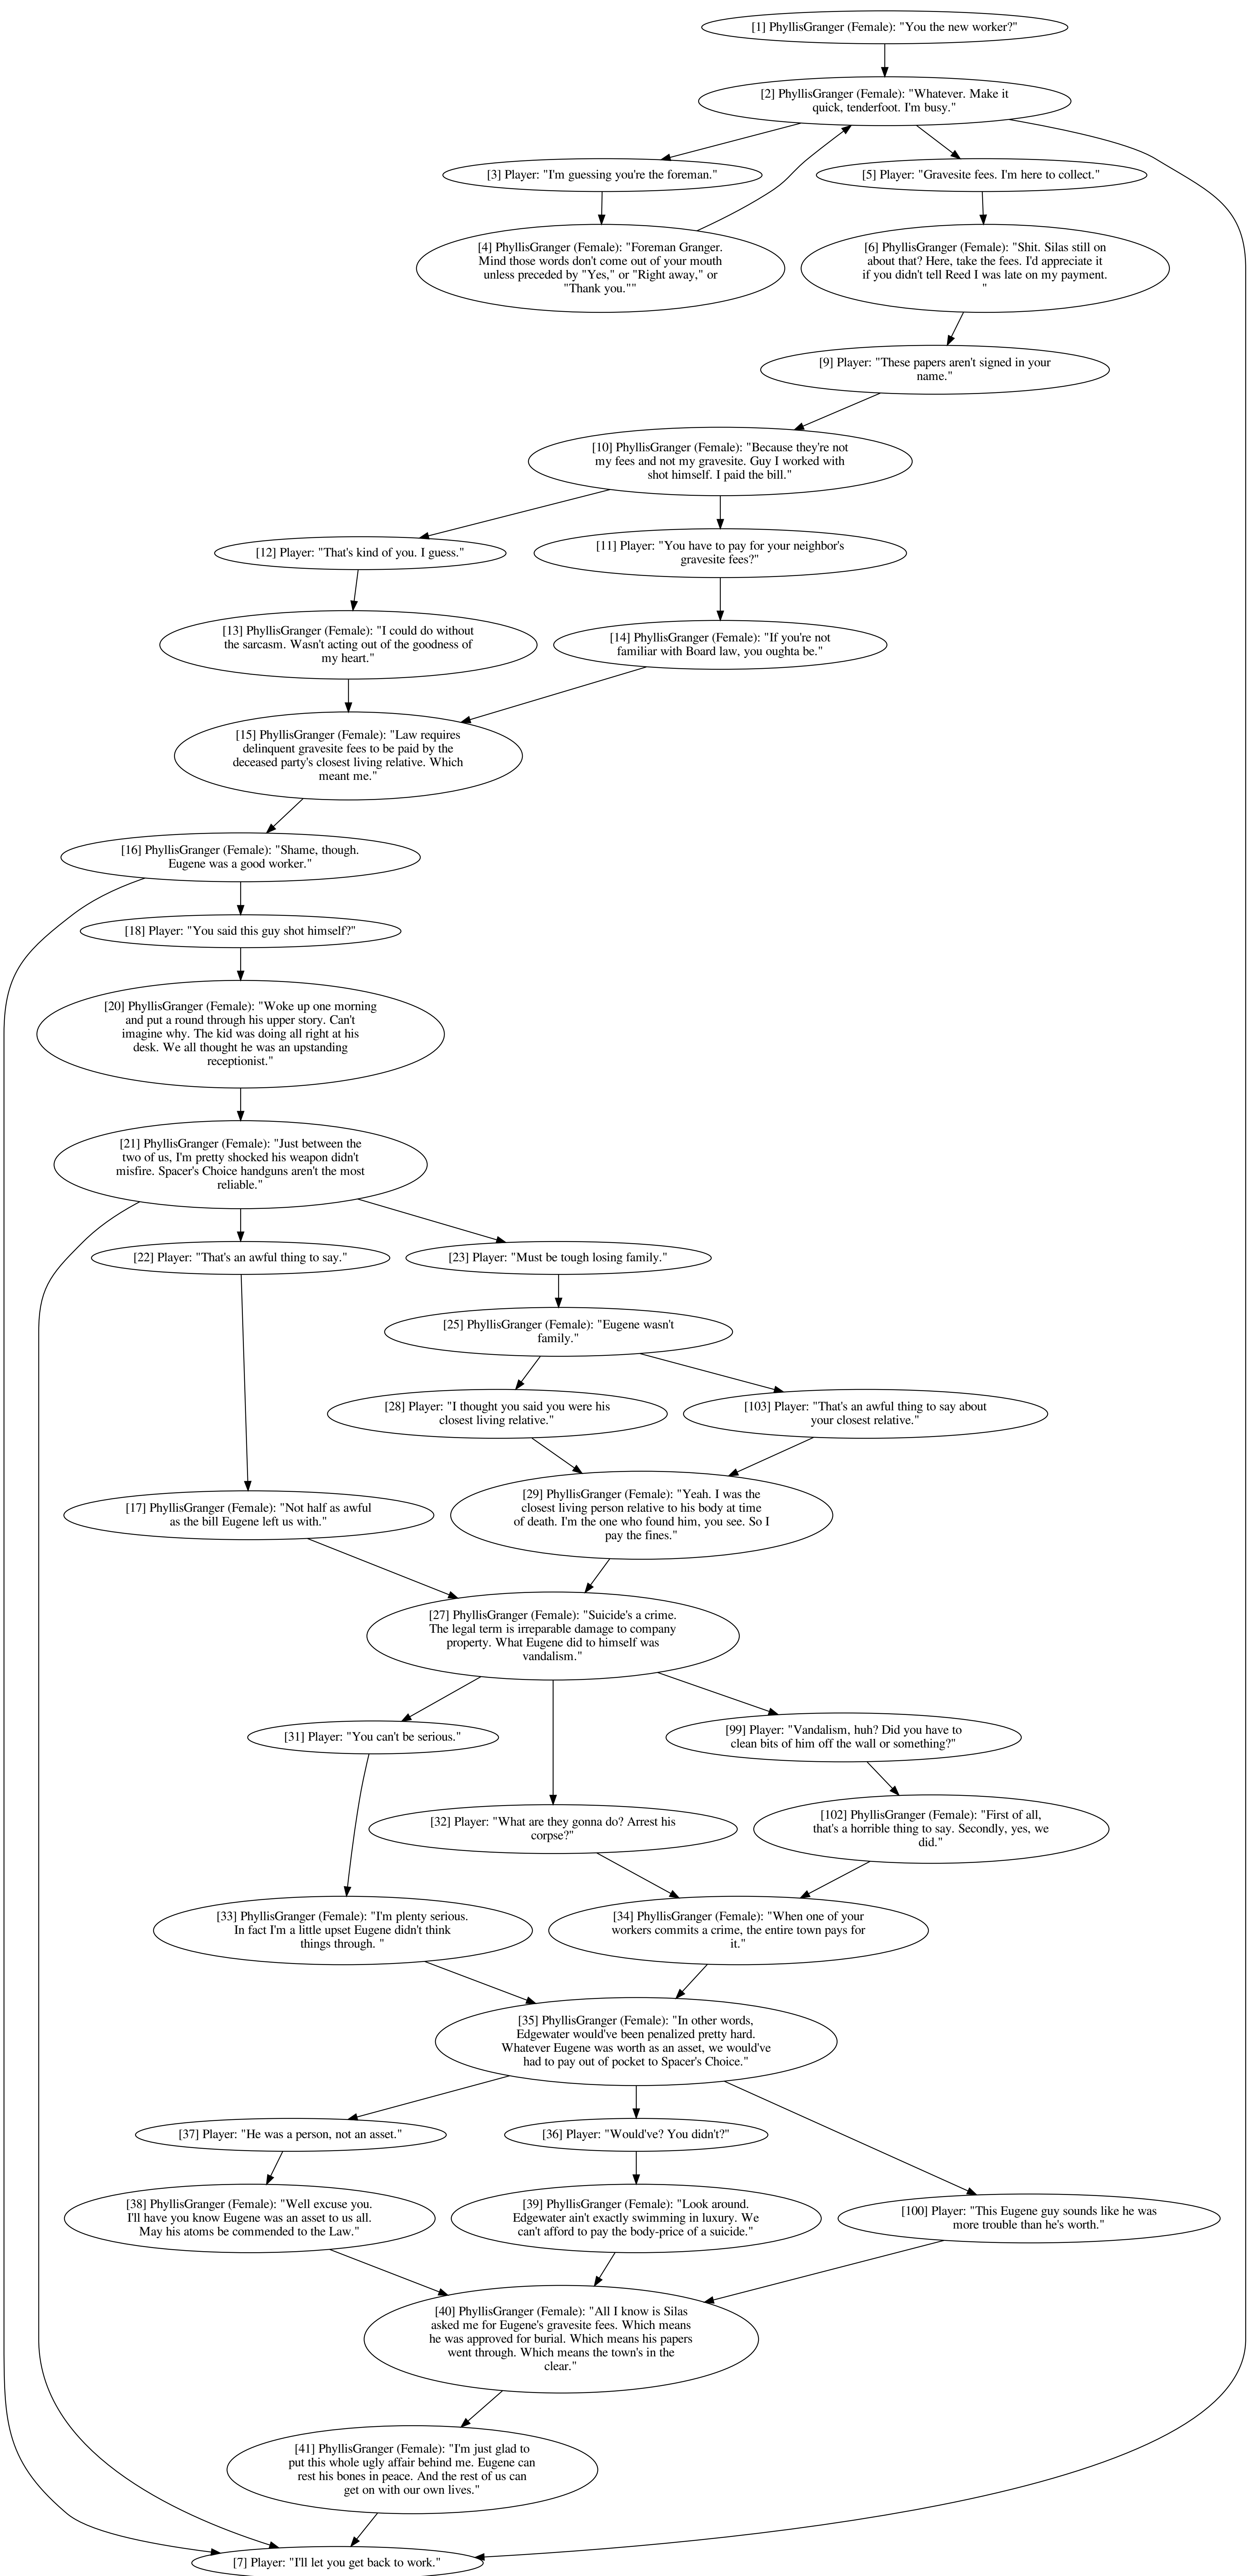

Supplement: software [file 2024.emnlp-main.520.software.zip]
